# Supplementary material for: Dysregulation of Ceramide Metabolism Is Linked to Iron Deposition and Activation of Related Pathways in the Aorta of Atherosclerotic Miniature Pigs
Source: MDPI journal article supplement (doi:10.3390/antiox13010004), 2023-12-19
Supplement: s1 [file s1]

**Table S1. Information on primers used to perform qRT-PCR**

| No | Gene symbol | Primer sequences (5'-3') |                           | GenBank No.    |
|----|-------------|--------------------------|---------------------------|----------------|
| 1  | FTL         | Forward                  | AGAAGATGGGCGACCACTGAC     | NM_001244131.1 |
|    |             | Reversed                 | TCGTGCTTGAGTGTGAGCCTTTC   |                |
| 2  | NCOA4       | Forward                  | TTGGAGCTTGCTATTGGTGGAGTTC | NM_001243122.1 |
|    |             | Reversed                 | CTGTGAATCTGGGCTTTGACCTCTC |                |
| 3  | SLC40A1     | Forward                  | TGTCCCTGAGATGAGCCCTAAACC  | XM_003483701.4 |
|    |             | Reversed                 | AAGACCGATTCTAGCAGCAATGACG |                |
| 4  | TFRC        | Forward                  | GCTCGGCAGGTAGATGGTGATAAC  | NM_214001.1    |
|    |             | Reversed                 | TGTGGTTACTCCTTGTGTTGCTGTC |                |
| 5  | ASAHI       | Forward                  | GCTGTCACTGGCATACTTTAGGAG  | XM_003134187.6 |
|    |             | Reversed                 | TCCACCCAAGCAATAGTCCGAAATC |                |
| 6  | CERS6       | Forward                  | GACCACAAATTGCCAGCCAAATG   | XM_021075470.1 |
|    |             | Reversed                 | TCTGTCGGAACCAGTGTTGAATGC  |                |
| 7  | GALC        | Forward                  | TCTGCTTCTATGCTGCTTGACTCTG | NM_001243631.1 |
|    |             | Reversed                 | ACTGTACGGGTCCCAGGATAATGAG |                |
| 8  | SGMS1       | Forward                  | GTTGGCACGCTGTACCTGTATCG   | NM_001097438.2 |
|    |             | Reversed                 | ATTATTCTCCGCAGTTGGGCTTCC  |                |
| 9  | SGPP1       | Forward                  | CGTGGTCAAGTTGGAGGTCTTCTAC | XM_013993487.2 |
|    |             | Reversed                 | CAACGGCCATAGGTGAGCAGAAC   |                |
| 10 | GAPDH       | Forward                  | TCACCAACACCAGCATCCA       | NM_001206359.1 |
| 12 |             | Reversed                 | GCACATCTCTCGAAGCACCA      |                |

Note: FTL: Ferritin light chain; NCOA4: Nuclear receptor coactivator 4; SLC40A1: Iron transporter; TFRC: Transferrin receptor; ASAH1: Neutral ceramidase 1; CERS6: Ceramide synthase 6; GALC: galactosylceramidase; SGMS1: Sphingomyelin synthase 1; SGPP1: Sphingosine-1-phosphate phosphatase 1; GAPDH: Glyceraldehyde-3-phosphate dehydrogenase.

**Table S2. Abbreviations for the detected lipids**

| <b>Lipid Class</b> | <b>Lipid Name</b>                  |
|--------------------|------------------------------------|
| PC                 | Phosphatidylcholine                |
| TG                 | Triglyceride                       |
| PE                 | Phosphatidylethanolamine           |
| SM                 | Sphingomyelin                      |
| Cer                | Ceramides                          |
| PS                 | Phosphatidylserine                 |
| PI                 | Phosphatidylinositol               |
| LPC                | Lysophosphatidylcholine            |
| CerG1              | hexosyl ceramide                   |
| DG                 | Diglyceride                        |
| LPE                | Lysophosphatidylethanolamine       |
| PG                 | Phosphatidylglycerol               |
| CerG3              | hexosyl ceramide                   |
| CerG3GNAc1         | Dihexosyl N-acetylhexosyl ceramide |
| LPS                | Lysophosphatidylserine             |
| GM3                | Ganglioside                        |
| So                 | Sphingosine                        |
| Co                 | Coenzyme Q                         |
| LPI                | Lysophosphatidylinositol           |
| FA                 | Fatty acid                         |
| MGDG               | Monogalactosyldiacylglycerol       |
| ChE                | Cholesterol Ester                  |
| CL                 | Cardiolipin                        |
| AcCa               | Acyl Carnitine                     |

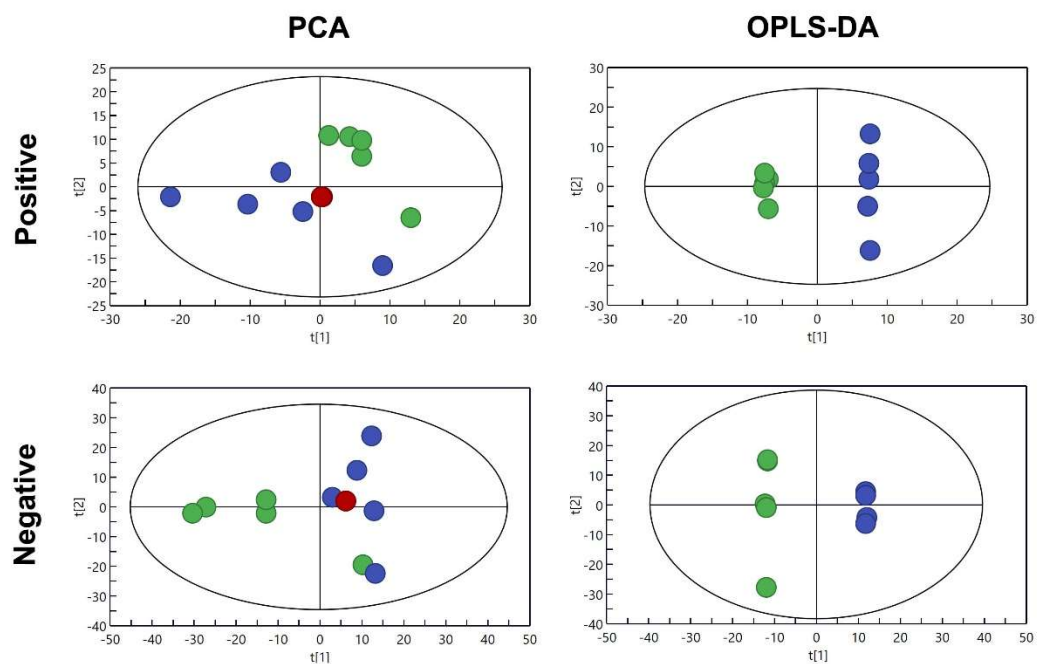

**Figure S1:** Multivariate data analysis of LC-MS lipidomics data from abdominal aorta samples from NC and HFCF pigs. Unsupervised principal component analysis (PCA) score plot and supervised orthogonal partial least-squares-discriminant analysis (OPLS-DA) models. Blue and green symbols represent aorta samples from HFCF and NC pigs, respectively. Red symbols represent QC samples. NC, normal chow; HFCF, high-fat, high-cholesterol, and high-fructose diet.

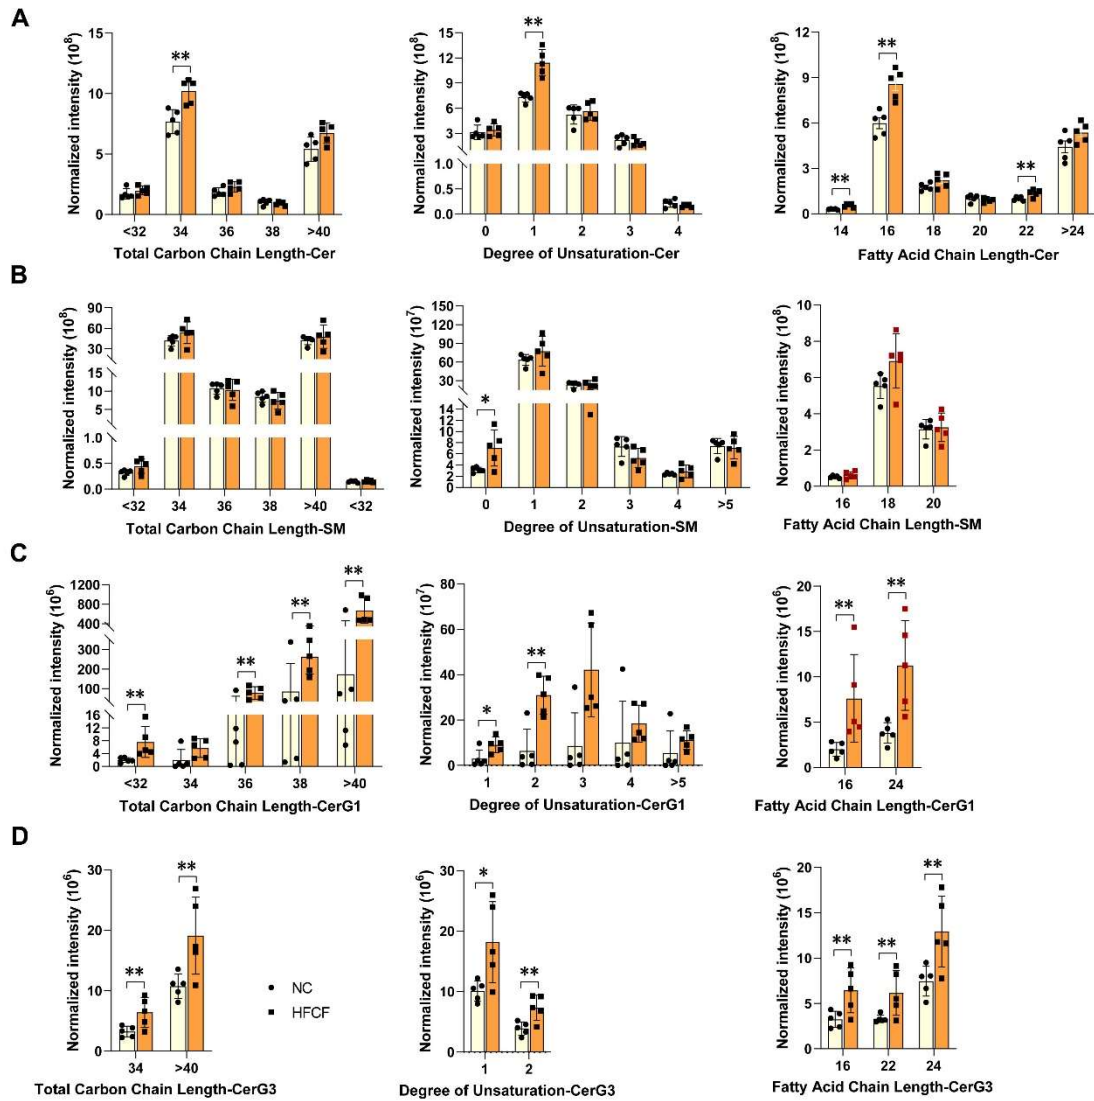

**Figure S2:** Altered fatty acid composition of sphingolipids in the aorta of miniature pigs fed a HFCF diet. Analysis of fatty-acyl composition of Cer, SM, CerG1, and CerG3 species by total carbon chain length total degree of unsaturation and sphingolipids N-acyl chain lengths (A-D). Data from five pigs for each group were used for statistical analysis. NC, normal chow; HFCF, high-fat, high-cholesterol, and high-fructose diet; Cer, Ceramide; SM, Sphingomyelin; CerG1 and CerG3, hexosyl ceramide. All data were presented as means  $\pm$  SE and analyzed using student's *t*, \*  $p < 0.05$ , \*\*  $p < 0.01$ .

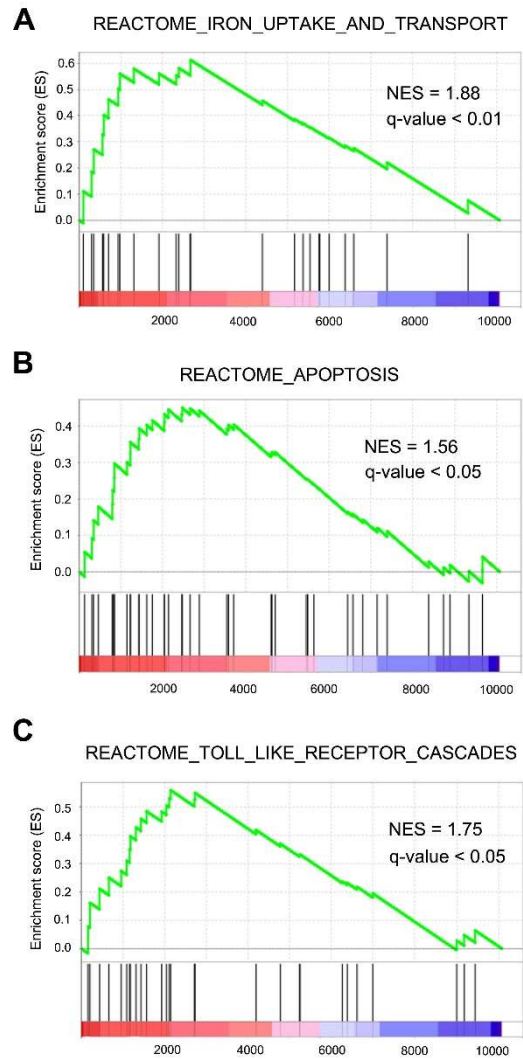

**Figure S3:** Gene set enrichment analysis showing significant enrichment in iron uptake and transport, toll-like receptor cascades, and apoptosis from NC and HFCF pigs. NC, normal chow; HFCF, high-fat, high-cholesterol, and high-fructose diet. NES, normalized enrichment score.

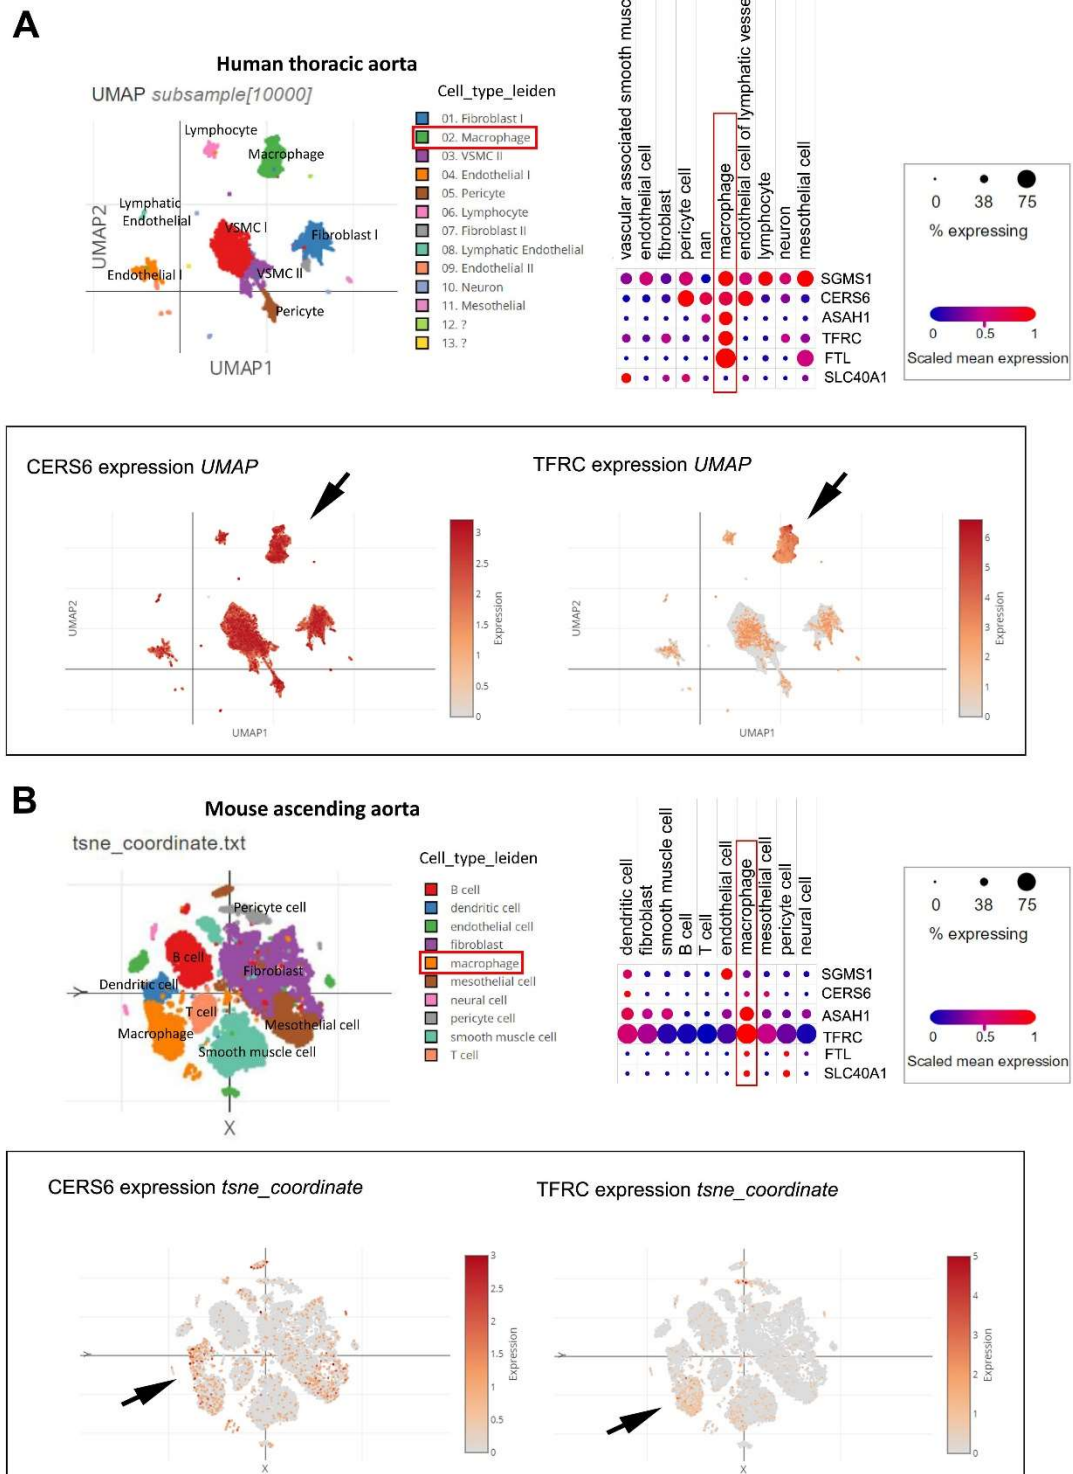

**Figure S4:** Ceramide generation and iron deposition related genes are found in macrophage cells in both human and mouse aortas. Single-cell RNA-Seq analyses were performed on the Single Cell RNA-Seq database of the Broad Institute of MIT and Harvard. A. Single-Cell RNA-Seq database portal for human thoracic aorta: [https://singlecell.broadinstitute.org/single\\_cell/study/SCP1265/deep-learning-enables-genetic-](https://singlecell.broadinstitute.org/single_cell/study/SCP1265/deep-learning-enables-genetic-)

analysis-of-the-human-thoracic-aorta

(<https://www.biorxiv.org/content/10.1101/2020.05.12.091934v1>); B. mouse ascending aorta:

[https://singlecell.broadinstitute.org/single\\_cell/study/SCP1361/single-cell-transcriptome-analysis-reveals-cellular-heterogeneity-in-the-ascending-aorta-of-normal-and-high-fat-diet-mice#study-visualize](https://singlecell.broadinstitute.org/single_cell/study/SCP1361/single-cell-transcriptome-analysis-reveals-cellular-heterogeneity-in-the-ascending-aorta-of-normal-and-high-fat-diet-mice#study-visualize). CERS6, ceramide synthase 6; TFRC, transferrin receptor.
