# Supplementary material for: Dysregulation of Ceramide Metabolism Is Linked to Iron Deposition and Activation of Related Pathways in the Aorta of Atherosclerotic Miniature Pigs
Source: Antioxidants (Basel). 2023 Dec 19;13(1):4. doi: 10.3390/antiox13010004 (PMC10812416; doi:10.3390/antiox13010004)
Supplement: Supplementary file 1 [file antioxidants-13-00004-s001.zip › Supplementary file 2.xlsx]

## Sheet: Table S3
LipidIon	LipidGroup	Class	FattyAcid	FA1	FA2	FA3	FA4	IonFormula	CalMz	RT-(min)	QCRSD	NC1	NC2	NC3	NC4	NC5	HFCF1	HFCF2	HFCF3	HFCF4	HFCF5	QC-1	QC-2	QC-3
PE(40:4p)-H	PE(40:4p)-H	PE	(40:4p)	(40:4p)				C45 H81 O7 N1 P1	778.576	12.9724	0.0050954	7.55391e+07	6.20075e+07	6.8787e+07	60491041	7.31254e+07	5.32427e+07	5.97234e+07	5.56334e+07	4.44522e+07	3.05264e+07	5.26978e+07	5.2235e+07	5.22358e+07
PC(18:0p/16:0)+HCOO	PC(34:0p)+HCOO	PC	(18:0p/16:0)	(18:0p)	(16:0)			C43 H85 O9 N1 P1	790.597	12.1121	0.00550921	2.88876e+07	2.97514e+07	2.99828e+07	2.06307e+07	3.59578e+07	9.93597e+07	5.16902e+07	5.74986e+07	4.94291e+07	5.08841e+07	4.34402e+07	4.34404e+07	4.30271e+07
Cer(d18:1/14:0)+HCOO	Cer(d32:1)+HCOO	Cer	(d18:1/14:0)	(d18:1)	(14:0)			C33 H64 O5 N1	554.479	10.7032	0.00880869	2.99043e+07	3.2045e+07	3.18187e+07	2.44774e+07	2.89101e+07	5.98057e+07	6.53229e+07	4.48886e+07	6.5122e+07	3.94956e+07	3.77456e+07	3.77293e+07	3.8316e+07
PE(18:0/22:4)-H	PE(40:4)-H	PE	(18:0/22:4)	(18:0)	(22:4)			C45 H81 O8 N1 P1	794.571	12.5242	0.00121814	7.84612e+07	9.2569e+07	8.8737e+07	4.14308e+07	7.98756e+07	6.10756e+07	5.34908e+07	5.26583e+07	4.98807e+07	2.72401e+07	5.72537e+07	5.71329e+07	5.72535e+07
SM(d18:0/20:2)+HCOO	SM(d38:2)+HCOO	SM	(d18:0/20:2)	(d18:0)	(20:2)			C44 H86 O8 N2 P1	801.613	11.639	0.00485865	3.30165e+07	3.24981e+07	3.75747e+07	2.03084e+07	3.93559e+07	1.49893e+07	1.21007e+07	2.13599e+07	1.5695e+07	1.15095e+07	2.18368e+07	2.16316e+07	2.16915e+07
PC(16:0/18:2)+HCOO	PC(34:2)+HCOO	PC	(16:0/18:2)	(16:0)	(18:2)			C43 H81 O10 N1 P1	802.56	10.7735	0.0064258	9.3609e+07	8.17583e+07	8.85985e+07	9.55037e+07	1.12353e+08	1.96204e+08	1.52119e+08	1.04137e+08	1.1138e+08	1.16522e+08	120558872	1.19223e+08	119230652
PC(18:1/18:2)+HCOO	PC(36:3)+HCOO	PC	(18:1/18:2)	(18:1)	(18:2)			C45 H83 O10 N1 P1	828.576	10.8492	0.00413577	3.8678e+07	3.43773e+07	4.59147e+07	4.4719e+07	4.91886e+07	9.61091e+07	7.61889e+07	7.22902e+07	5.5048e+07	5.18302e+07	5.49597e+07	5.4568e+07	5.49618e+07
Cer(d18:1/16:0)+HCOO	Cer(d34:1)+HCOO	Cer	(d18:1/16:0)	(d18:1)	(16:0)			C35 H68 O5 N1	582.51	11.7673	0.00421528	3.43452e+08	338097471	361543749	3.12372e+08	273280107	4.17735e+08	5.49426e+08	4.93272e+08	5.53923e+08	466610872	3.97756e+08	3.9776e+08	4.00669e+08
PC(18:0p/20:4)+HCOO	PC(38:4p)+HCOO	PC	(18:0p/20:4)	(18:0p)	(20:4)			C47 H85 O9 N1 P1	838.597	11.2474	0.00412726	4.45779e+07	5.00926e+07	4.8396e+07	3.75392e+07	4.13653e+07	1.01534e+08	7.02868e+07	6.42697e+07	5.8982e+07	5.80829e+07	5.30138e+07	5.2637e+07	5.30164e+07
Cer(d18:0/16:0)+HCOO	Cer(d34:0)+HCOO	Cer	(d18:0/16:0)	(d18:0)	(16:0)			C35 H70 O5 N1	584.526	12.1304	0.00814343	1.99693e+07	2.17452e+07	2.65885e+07	1.50374e+07	1.9005e+07	5.85556e+07	5.06706e+07	3.52593e+07	4.4256e+07	2.89728e+07	3.10449e+07	3.14878e+07	3.14861e+07
PC(18:0/20:4)+HCOO	PC(38:4)+HCOO	PC	(18:0/20:4)	(18:0)	(20:4)			C47 H85 O10 N1 P1	854.592	11.5747	0.00305694	3.33003e+08	3.65463e+08	3.11079e+08	2.23517e+08	2.52375e+08	246897879	2.49757e+08	2.35274e+08	224199710	1.57754e+08	244566197	2.44555e+08	2.45858e+08
PC(18:0/20:3)+HCOO	PC(38:3)+HCOO	PC	(18:0/20:3)	(18:0)	(20:3)			C47 H87 O10 N1 P1	856.607	11.9749	0.00283959	3.26662e+07	3.40095e+07	3.12434e+07	2.97308e+07	3.97015e+07	7.30002e+07	5.91702e+07	4.29643e+07	3.96294e+07	3.90463e+07	3.92821e+07	3.90909e+07	3.92854e+07
PI(18:0/20:4)-H	PI(38:4)-H	PI	(18:0/20:4)	(18:0)	(20:4)			C47 H82 O13 N0 P1	885.55	10.8705	0.00303625	2.47273e+07	3.62468e+07	2.73572e+07	1.91766e+07	3.16665e+07	1.38856e+07	1.18058e+07	1.04039e+07	1.16313e+07	6.84827e+06	2.67828e+07	2.69244e+07	2.67838e+07
Cer(d18:1/18:0)+HCOO	Cer(d36:1)+HCOO	Cer	(d18:1/18:0)	(d18:1)	(18:0)			C37 H72 O5 N1	610.542	12.8249	0.00833204	8.68058e+07	6.91625e+07	8.04608e+07	6.3987e+07	6.71644e+07	1.06849e+08	1.50931e+08	1.2772e+08	1.0291e+08	8.05854e+07	9.0941e+07	9.09735e+07	9.22759e+07
Cer(d18:2/20:0)+HCOO	Cer(d38:2)+HCOO	Cer	(d18:2/20:0)	(d18:2)	(20:0)			C39 H74 O5 N1	636.557	12.941	0.0112217	6.609e+07	6.27967e+07	6.80308e+07	2.78506e+07	5.46262e+07	2.33727e+07	2.67663e+07	4.32175e+07	4.06976e+07	2.52392e+07	3.9256e+07	3.92679e+07	4.003e+07
Cer(d18:1/22:0)+HCOO	Cer(d40:1)+HCOO	Cer	(d18:1/22:0)	(d18:1)	(22:0)			C41 H80 O5 N1	666.604	15.1745	0.00639631	2.72199e+07	2.43053e+07	2.28414e+07	2.96183e+07	2.26777e+07	5.30815e+07	6.10674e+07	4.95854e+07	4.97925e+07	3.62696e+07	3.72573e+07	3.72561e+07	3.7671e+07
PC(34:1e)+H	PC(34:1e)+H	PC	(34:1e)	(34:1e)				C42 H85 O7 N1 P1	746.606	12.1087	0.00425364	3.2386e+08	3.31872e+08	3.38646e+08	2.11076e+08	432066132	1242054370	618304349	5.79199e+08	5.40633e+08	4.79287e+08	5.08695e+08	5.08701e+08	5.12455e+08
PE(18:2p/20:4)+H	PE(38:6p)+H	PE	(18:2p/20:4)	(18:2p)	(20:4)			C43 H75 O7 N1 P1	748.528	10.6629	0.00683671	1.50403e+08	1.87812e+08	196800955	1.29184e+08	1.47723e+08	1.40353e+08	120292212	8.20071e+07	9.00339e+07	7.41572e+07	1.31941e+08	1.30665e+08	1.30215e+08
PE(18:0p/20:4)+H	PE(38:4p)+H	PE	(18:0p/20:4)	(18:0p)	(20:4)			C43 H79 O7 N1 P1	752.559	12.3351	0.0018529	8.05476e+08	5.97752e+08	7.80495e+08	6.6141e+08	7.34009e+08	6.1316e+08	5.85159e+08	5.84778e+08	395268837	3.14567e+08	5.6589e+08	5.67713e+08	5.67707e+08
SM(d38:2)+H	SM(d38:2)+H	SM	(d38:2)	(d38:2)				C43 H86 O6 N2 P1	757.622	11.6385	0.00348099	2.17408e+08	2.13424e+08	2.66891e+08	1.23398e+08	2.66129e+08	1.10749e+08	7.94068e+07	1.23456e+08	9.31411e+07	5.5923e+07	1.40329e+08	1.39485e+08	1.40329e+08
Cer(d18:1/24:1)+HCOO	Cer(d42:2)+HCOO	Cer	(d18:1/24:1)	(d18:1)	(24:1)			C43 H82 O5 N1	692.62	15.0748	0.0111346	8.54346e+07	9.72494e+07	8.27641e+07	6.81221e+07	6.86589e+07	1.46658e+08	1.50079e+08	1.51532e+08	1.62562e+08	1.16041e+08	1.10418e+08	1.10427e+08	1.12566e+08
Cer(d18:1/24:0)+HCOO	Cer(d42:1)+HCOO	Cer	(d18:1/24:0)	(d18:1)	(24:0)			C43 H84 O5 N1	694.635	16.4689	0.00369957	3.61669e+07	3.51605e+07	2.7728e+07	6.19812e+07	3.24074e+07	6.62054e+07	7.8994e+07	6.18673e+07	6.41756e+07	5.51407e+07	5.40108e+07	5.40071e+07	5.43557e+07
PC(38:2)+H	PC(38:2)+H	PC	(38:2)	(38:2)				C46 H89 O8 N1 P1	814.632	12.5863	0.0161984	1.10532e+08	1.66291e+08	2.22176e+08	1.31862e+08	1.60999e+08	1.76082e+08	1.19898e+08	9.16472e+07	8.65471e+07	6.54543e+07	168788905	1.68717e+08	1.73532e+08
TG(16:0/14:0/18:1)+NH4	TG(48:1)+NH4	TG	(16:0/14:0/18:1)	(16:0)	(14:0)	(18:1)		C51 H100 O6 N1	822.755	21.3454	0.002228	1.56411e+08	1.02519e+07	2.96944e+06	1723970738	1.4118e+08	3374103430	2812507269	2589891284	3817155919	2884646125	2338993329	2329979701	2338995310
PC(18:0/20:4)+Na	PC(38:4)+Na	PC	(18:0/20:4)	(18:0)	(20:4)			C46 H84 O8 N1 P1 Na1	832.583	11.5768	0.00479393	4.06265e+08	4.43822e+08	4.04062e+08	3.4673e+08	3.18568e+08	2.85295e+08	308265912	2.84895e+08	2.86473e+08	2.20716e+08	324447745	3.21763e+08	3.21774e+08
TG(15:0/16:0/18:1)+NH4	TG(49:1)+NH4	TG	(15:0/16:0/18:1)	(15:0)	(16:0)	(18:1)		C52 H102 O6 N1	836.77	21.675	0.0062004	1.6066e+07	2.52789e+06	1.02327e+06	2.65156e+08	1.52255e+07	9.65913e+08	8.21189e+08	4.53235e+08	1105991565	8.77309e+08	548676347	5.42824e+08	5.42827e+08
PC(40:4)+H	PC(40:4)+H	PC	(40:4)	(40:4)				C48 H89 O8 N1 P1	838.632	12.2135	0.00249978	3.04685e+08	3.31553e+08	3.06652e+08	1.70051e+08	2.68533e+08	2.4997e+08	2.25337e+08	1.71597e+08	1.65686e+08	9.3356e+07	2.15357e+08	2.15358e+08	2.16291e+08
TG(16:0/16:0/18:3)+NH4	TG(50:3)+NH4	TG	(16:0/16:0/18:3)	(16:0)	(16:0)	(18:3)		C53 H100 O6 N1	846.755	20.6315	0.0307531	5.34065e+07	4.31087e+06	1.77539e+06	1238682941	8.74379e+07	2166785099	1630370763	860401740	2387442489	1455765575	1163807217	1227450554	1228692763
TG(16:0/16:1/18:1)+NH4	TG(50:2)+NH4	TG	(16:0/16:1/18:1)	(16:0)	(16:1)	(18:1)		C53 H102 O6 N1	848.77	21.3547	0.00542021	1156860683	8.90073e+07	1.74663e+07	5921519289	1323866390	6437193804	6348739428	6422285044	20129398359	7513544225	5929940379	5916609711	5977846222
TG(16:0/16:0/18:1)+NH4	TG(50:1)+NH4	TG	(16:0/16:0/18:1)	(16:0)	(16:0)	(18:1)		C53 H104 O6 N1	850.786	22.6189	0.0884886	9.75671e+07	2.74057e+06	1.81361e+06	1.60612e+08	1.27065e+07	6.03636e+08	3.80307e+08	277802539	1679030596	5.84788e+08	5.7718e+08	6.63575e+08	5.66295e+08
TG(16:0/16:0/18:1)+NH4	TG(50:1)+NH4	TG	(16:0/16:0/18:1)	(16:0)	(16:0)	(18:1)		C53 H104 O6 N1	850.786	22.2732	0.00259351	1258110707	1.41053e+08	2.66996e+07	4947035075	1084242184	8461093488	9514765710	8277848721	9162801028	9118175454	7161724329	7129695164	7129603609
TG(18:0/16:0/16:0)+NH4	TG(50:0)+NH4	TG	(18:0/16:0/16:0)	(18:0)	(16:0)	(16:0)		C53 H106 O6 N1	852.801	23.0272	0.00443794	6.16988e+08	6.11425e+07	2.80154e+07	2016444888	4.04807e+08	1674327055	2418929382	1777240772	1640270901	1971819093	2067514175	2051706915	2051698625
TG(16:0/17:0/18:2)+NH4	TG(51:2)+NH4	TG	(16:0/17:0/18:2)	(16:0)	(17:0)	(18:2)		C54 H104 O6 N1	862.786	21.8713	0.00987116	9.90836e+07	5.95065e+06	1.36666e+06	2308366521	1.10765e+08	2533788035	2796165576	1273989698	3243241682	2688768994	1804558758	1774221280	1773887988
TG(16:0/17:0/18:1)+NH4	TG(51:1)+NH4	TG	(16:0/17:0/18:1)	(16:0)	(17:0)	(18:1)		C54 H106 O6 N1	864.801	22.5387	0.00321998	1.29236e+08	1.34942e+07	2.65821e+06	1632675279	1.0642e+08	4342019929	3887260756	2413903019	5100858379	4180406730	2823109618	2838915368	2823172383
TG(18:0/16:0/17:0)+NH4	TG(51:0)+NH4	TG	(18:0/16:0/17:0)	(18:0)	(16:0)	(17:0)		C54 H108 O6 N1	866.817	23.2192	0.0348276	3.61021e+07	3.26552e+06	1.18466e+06	3.97899e+08	2.00386e+07	5.0352e+08	6.99393e+08	377688196	8.96767e+08	696376922	5.91269e+08	6.27146e+08	5.90304e+08
TG(16:0/18:1/18:2)+NH4	TG(52:3)+NH4	TG	(16:0/18:1/18:2)	(16:0)	(18:1)	(18:2)		C55 H104 O6 N1	874.786	21.4748	0.00706487	5562035112	3.39027e+08	6.20437e+07	34158915172	5979586305	36360343774	33711812607	24312763017	44700569703	34906878190	31526012056	31524287287	31912490895
TG(16:0/18:1/18:1)+NH4	TG(52:2)+NH4	TG	(16:0/18:1/18:1)	(16:0)	(18:1)	(18:1)		C55 H106 O6 N1	876.801	22.2864	0.00791085	4008126746	6.19458e+08	6.83034e+07	47521318565	3278081802	59358256623	30486305850	24521461036	31845149567	25118307099	26273089155	25917639872	26278913252
TG(18:0/16:0/18:1)+NH4	TG(52:1)+NH4	TG	(18:0/16:0/18:1)	(18:0)	(16:0)	(18:1)		C55 H108 O6 N1	878.817	23.0051	0.00196714	4833406576	3.33764e+08	8.01538e+07	20364597354	3246219208	31451604917	26356531755	25278164908	35961793352	27941616753	24237914452	24147215966	24167662164
TG(18:0/16:0/18:0)+NH4	TG(52:0)+NH4	TG	(18:0/16:0/18:0)	(18:0)	(16:0)	(18:0)		C55 H110 O6 N1	880.833	23.6191	0.00410873	1411848345	7.04849e+07	1.14797e+07	5935096540	5.13697e+08	5321545459	6472282549	4817740560	4133076007	5427751387	6119829115	6108985603	6072022409
TG(17:0/18:1/18:1)+NH4	TG(53:2)+NH4	TG	(17:0/18:1/18:1)	(17:0)	(18:1)	(18:1)		C56 H108 O6 N1	890.817	22.6708	0.0138417	1.93528e+08	1.21488e+07	3.03411e+06	1270638084	9.40579e+07	3713346304	2717892854	2921605624	4068735232	3326721513	2159712274	2211976993	2159848129
TG(18:0/17:0/18:1)+NH4	TG(53:1)+NH4	TG	(18:0/17:0/18:1)	(18:0)	(17:0)	(18:1)		C56 H110 O6 N1	892.833	23.2343	0.0186308	7.80301e+07	4.7255e+06	1.68349e+06	1516210067	5.15723e+07	2934289711	1860833333	1519225778	2513199247	1591171508	1530368518	1474387601	1502380738
TG(18:0/18:1/18:1)+NH4	TG(54:2)+NH4	TG	(18:0/18:1/18:1)	(18:0)	(18:1)	(18:1)		C57 H110 O6 N1	904.833	23.407	0.0173751	3.33539e+07	8.17876e+06	1.38123e+06	1330572530	7.35082e+07	2192558606	1111772713	1082159814	1947535550	1108337963	1386387603	1428294448	1385928114
TG(18:0/18:0/18:1)+NH4	TG(54:1)+NH4	TG	(18:0/18:0/18:1)	(18:0)	(18:0)	(18:1)		C57 H112 O6 N1	906.848	23.5905	0.00220537	8.73102e+08	1.78242e+07	7.99406e+06	6570644162	4.59549e+08	8461783161	5142522154	7360423964	9688078854	5310980675	5538833512	5517789636	5539006169
SM(d34:0)+HCOO	SM(d34:0)+HCOO	SM	(d34:0)	(d34:0)				C40 H82 O8 N2 P1	749.581	10.8696	0.000702604	2.46066e+07	2.73482e+07	3.11342e+07	2.24033e+07	2.38157e+07	7.63657e+07	6.47577e+07	4.44359e+07	6.32581e+07	2.65621e+07	3.94715e+07	3.94161e+07	3.94428e+07
TG(16:0/18:1/22:6)+NH4	TG(56:7)+NH4	TG	(16:0/18:1/22:6)	(16:0)	(18:1)	(22:6)		C59 H104 O6 N1	922.786	20.6677	0.00507847	1.06596e+07	8.15558e+06	8.01187e+06	2.45605e+08	1.7677e+07	812879270	4.36005e+08	3.75136e+08	7.2424e+08	6.00365e+08	3.57019e+08	3.6014e+08	3.56963e+08
PE(40:6p)-H	PE(40:6p)-H	PE	(40:6p)	(40:6p)				C45 H77 O7 N1 P1	774.544	11.4624	0.00751751	3.07502e+07	1.85307e+07	3.82108e+07	1.32425e+07	3.75479e+07	3.26717e+07	2.55511e+07	2.15797e+07	2.17604e+07	1.5676e+07	2.63598e+07	2.60197e+07	2.60194e+07
PE(18:0p/22:6)-H	PE(40:6p)-H	PE	(18:0p/22:6)	(18:0p)	(22:6)			C45 H77 O7 N1 P1	774.544	11.7789	0.0185489	6.05203e+06	8.02935e+06	7.46745e+06	3.91224e+06	7.82956e+06	9.10116e+06	6.8636e+06	8.8863e+06	7.2609e+06	3.93672e+06	6.49891e+06	6.29303e+06	6.50035e+06
SM(d18:0/18:1)+HCOO	SM(d36:1)+HCOO	SM	(d18:0/18:1)	(d18:0)	(18:1)			C42 H84 O8 N2 P1	775.597	11.5195	0.00245894	9.28682e+07	7.46875e+07	7.84887e+07	7.67786e+07	8.42854e+07	1.09752e+08	1.19144e+08	9.75174e+07	8.55684e+07	6.1727e+07	8.88405e+07	8.92197e+07	8.92201e+07
PC(16:0/16:1)+HCOO	PC(32:1)+HCOO	PC	(16:0/16:1)	(16:0)	(16:1)			C41 H79 O10 N1 P1	776.545	10.666	0.0112426	3.18987e+07	3.29573e+07	2.46368e+07	1.69992e+07	3.32549e+07	3.84212e+07	4.33275e+07	2.89368e+07	2.57033e+07	3.66301e+07	3.57281e+07	3.50353e+07	3.57248e+07
PE(40:5p)-H	PE(40:5p)-H	PE	(40:5p)	(40:5p)				C45 H79 O7 N1 P1	776.56	12.1014	0.000584569	5.89083e+07	7.14921e+07	6.18724e+07	3.34732e+07	5.42463e+07	7.32984e+07	5.0762e+07	5.23097e+07	5.08802e+07	3.23551e+07	4.84769e+07	4.84278e+07	4.84769e+07
PE(18:0p/22:5)-H	PE(40:5p)-H	PE	(18:0p/22:5)	(18:0p)	(22:5)			C45 H79 O7 N1 P1	776.56	12.7046	0.0161406	5.52782e+06	7.50494e+06	8.86125e+06	6.65217e+06	7.64367e+06	5.87162e+06	5.71305e+06	7.41872e+06	4.93283e+06	2.97179e+06	5.6971e+06	5.86047e+06	5.70228e+06
SM(d36:0)+HCOO	SM(d36:0)+HCOO	SM	(d36:0)	(d36:0)				C42 H86 O8 N2 P1	777.613	11.8947	0.0449341	4.76534e+06	4.34076e+06	5.35938e+06	4.47114e+06	3.86974e+06	1.2733e+07	1.12849e+07	7.76076e+06	9.24345e+06	4.57228e+06	6.88318e+06	6.32631e+06	6.79657e+06
PC(16:0/16:0)+HCOO	PC(32:0)+HCOO	PC	(16:0/16:0)	(16:0)	(16:0)			C41 H81 O10 N1 P1	778.56	11.4666	0.0037277	1.33904e+08	1.2395e+08	1.05969e+08	8.93774e+07	1.38472e+08	2.03254e+08	1.6617e+08	1.40489e+08	1.18049e+08	1.41009e+08	136353388	1.35477e+08	1.35477e+08
PE(40:4p)-H	PE(40:4p)-H	PE	(40:4p)	(40:4p)				C45 H81 O7 N1 P1	778.576	13.3637	0.0278552	9.87478e+06	7.32177e+06	8.764e+06	8.37948e+06	8.02303e+06	7.9161e+06	1.08769e+07	6.77658e+06	6.39625e+06	6.50903e+06	7.89917e+06	8.29279e+06	8.2931e+06
LPC(16:0)+HCOO	LPC(16:0)+HCOO	LPC	(16:0)	(16:0)				C25 H51 O9 N1 P1	540.331	2.63114	0.0093429	3.28836e+06	3.62313e+06	1.86867e+06	2.20488e+06	3.09974e+06	4.03598e+07	1.14609e+07	7.15564e+06	1.53822e+07	6.25611e+06	8.28432e+06	8.41991e+06	8.41978e+06
PS(18:2/18:2)-H	PS(36:4)-H	PS	(18:2/18:2)	(18:2)	(18:2)			C42 H73 O10 N1 P1	782.498	11.0642	0.00697075	2.83779e+06	1.5168e+06	1.30971e+06	2.81402e+06	3.02117e+06	7.38152e+06	3.70474e+06	3.06195e+06	2.2168e+06	1.9571e+06	2.92993e+06	2.89448e+06	2.92948e+06
PS(36:3)-H	PS(36:3)-H	PS	(36:3)	(36:3)				C42 H75 O10 N1 P1	784.513	11.8326	0.003934	4.51091e+06	3.19796e+06	3.29666e+06	3.95466e+06	5.3307e+06	1.11459e+07	6.75254e+06	7.48715e+06	4.39736e+06	4.02454e+06	5.31592e+06	5.316e+06	5.35226e+06
PS(18:1/18:2)-H	PS(36:3)-H	PS	(18:1/18:2)	(18:1)	(18:2)			C42 H75 O10 N1 P1	784.513	9.95471	0.0524607	973340	360422	169402	1.49535e+06	1.49493e+06	3.76991e+06	1.67046e+06	1.7315e+06	732897	1.7273e+06	1.44079e+06	1.31776e+06	1.31695e+06
PS(18:0/18:2)-H	PS(36:2)-H	PS	(18:0/18:2)	(18:0)	(18:2)			C42 H77 O10 N1 P1	786.529	10.873	0.0229292	1.36253e+07	1.61729e+07	1.41817e+07	2.04063e+07	1.62081e+07	3.55819e+07	2.52875e+07	2.04472e+07	1.75002e+07	1.71276e+07	1.69369e+07	1.76175e+07	1.69349e+07
PC(16:0p/18:2)+HCOO	PC(34:2p)+HCOO	PC	(16:0p/18:2)	(16:0p)	(18:2)			C43 H81 O9 N1 P1	786.565	11.238	0.00168949	6.51609e+06	8.22198e+06	1.05686e+07	7.81635e+06	9.01695e+06	9.91477e+06	8.39203e+06	6.97834e+06	5.55928e+06	6.04351e+06	7.71563e+06	7.6931e+06	7.6931e+06
PS(18:0/18:1)-H	PS(36:1)-H	PS	(18:0/18:1)	(18:0)	(18:1)			C42 H79 O10 N1 P1	788.545	11.6256	0.0183201	1.87959e+08	1.98733e+08	2.40007e+08	1.85267e+08	2.38139e+08	1.87208e+08	2.02081e+08	2.16441e+08	146651271	1.14563e+08	1.53146e+08	1.4841e+08	1.48365e+08
PC(16:0p/18:1)+HCOO	PC(34:1p)+HCOO	PC	(16:0p/18:1)	(16:0p)	(18:1)			C43 H83 O9 N1 P1	788.581	12.0043	0.00288118	1.94525e+07	2.38944e+07	2.59408e+07	1.51386e+07	2.84377e+07	2.02375e+07	1.89615e+07	2.35371e+07	1.64325e+07	1.1405e+07	1.77951e+07	1.7705e+07	1.77921e+07
PS(38:6p)-H	PS(38:6p)-H	PS	(38:6p)	(38:6p)				C44 H73 O9 N1 P1	790.503	11.3625	0.00374606	6.66721e+07	6.33467e+07	6.32269e+07	4.60367e+07	6.80537e+07	5.97516e+07	7.0677e+07	5.93066e+07	4.90468e+07	4.07713e+07	5.62209e+07	5.62197e+07	5.58563e+07
PC(17:1/16:0)+HCOO	PC(33:1)+HCOO	PC	(17:1/16:0)	(17:1)	(16:0)			C42 H81 O10 N1 P1	790.56	11.061	0.00620907	4.10441e+06	4.62737e+06	2.53153e+06	2.57368e+06	5.03834e+06	6.42464e+06	5.17205e+06	6.25739e+06	6.04403e+06	3.99366e+06	4.26061e+06	4.21173e+06	4.21948e+06
PE(18:0/22:5)-H	PE(40:5)-H	PE	(18:0/22:5)	(18:0)	(22:5)			C45 H79 O8 N1 P1	792.555	12.2134	0.0292959	7.95003e+06	9.74104e+06	9.09277e+06	3.9085e+06	9.0444e+06	1.39063e+07	6.78676e+06	8.0406e+06	7.03327e+06	7.38187e+06	7.0532e+06	7.42235e+06	7.06309e+06
PC(18:0e/16:0)+HCOO	PC(34:0e)+HCOO	PC	(18:0e/16:0)	(18:0e)	(16:0)			C43 H87 O9 N1 P1	792.612	13.0975	0.00801213	2.44629e+06	1.45808e+06	1.73161e+06	2.28128e+06	2.59883e+06	3.78665e+06	3.15117e+06	3.35373e+06	2.58169e+06	2.58414e+06	2.63967e+06	2.60343e+06	2.60332e+06
PS(38:4p)-H	PS(38:4p)-H	PS	(38:4p)	(38:4p)				C44 H77 O9 N1 P1	794.534	12.4096	0.00467148	4.81927e+06	5.23167e+06	6.50134e+06	3.7636e+06	7.70213e+06	6.7648e+06	6.63929e+06	1.03671e+07	5.81203e+06	4.02178e+06	5.54196e+06	5.59329e+06	5.57504e+06
PS(38:4p)-H	PS(38:4p)-H	PS	(38:4p)	(38:4p)				C44 H77 O9 N1 P1	794.534	10.716	0.00717874	2.21602e+06	2.20092e+06	1.1029e+06	797489	1.40501e+06	5.50215e+06	3.03118e+06	2.30704e+06	2.40484e+06	1.67788e+06	1.97722e+06	1.97691e+06	1.95259e+06
PE(18:0/22:3)-H	PE(40:3)-H	PE	(18:0/22:3)	(18:0)	(22:3)			C45 H83 O8 N1 P1	796.586	13.3138	0.0111847	4.95288e+06	4.36196e+06	3.89454e+06	1.58515e+06	4.82697e+06	3.16622e+06	1.78019e+06	4.99888e+06	2.78356e+06	1.90788e+06	2.99748e+06	2.94017e+06	2.94013e+06
PE(18:1/22:1)-H	PE(40:2)-H	PE	(18:1/22:1)	(18:1)	(22:1)			C45 H85 O8 N1 P1	798.602	13.8293	0.00640859	1.50303e+06	1.65898e+06	2.70716e+06	1.25473e+06	3.23486e+06	2.54274e+06	1.85682e+06	1.68918e+06	1.85804e+06	1.02694e+06	1.69778e+06	1.69779e+06	1.67901e+06
PS(37:2)-H	PS(37:2)-H	PS	(37:2)	(37:2)				C43 H79 O10 N1 P1	800.545	9.906	0.0609549	1.35257e+06	1.55057e+06	2.01835e+06	465102	978729	6.75612e+06	2.65383e+06	1.73855e+06	2.61441e+06	2.75008e+06	2.90854e+06	3.2179e+06	2.89301e+06
PC(16:0/18:3)+HCOO	PC(34:3)+HCOO	PC	(16:0/18:3)	(16:0)	(18:3)			C43 H79 O10 N1 P1	800.545	10.2128	0.0237572	2.20146e+06	1.78104e+06	1.75986e+06	1.29208e+06	1.40751e+06	2.21503e+06	2.89218e+06	1.92354e+06	1.42559e+06	1.3362e+06	1.69595e+06	1.62691e+06	1.69554e+06
PE(18:1/22:0)-H	PE(40:1)-H	PE	(18:1/22:0)	(18:1)	(22:0)			C45 H87 O8 N1 P1	800.617	15.038	0.0105281	1.17142e+06	1.26481e+06	2.12622e+06	1.18706e+06	2.4904e+06	1.25586e+06	1.15475e+06	1.50352e+06	809954	677725	1.16938e+06	1.19079e+06	1.16929e+06
LPC(18:2)+HCOO	LPC(18:2)+HCOO	LPC	(18:2)	(18:2)				C27 H51 O9 N1 P1	564.331	2.23384	0.0174904	317301	317815	183614	556284	340195	4.52861e+06	2.1444e+06	886352	2.38123e+06	1.03379e+06	1.35892e+06	1.40039e+06	1.35869e+06
SM(d22:1/16:0)+HCOO	SM(d38:1)+HCOO	SM	(d22:1/16:0)	(d22:1)	(16:0)			C44 H88 O8 N2 P1	803.628	12.5245	0.00598793	5.43414e+07	4.93015e+07	5.50269e+07	4.2804e+07	5.95391e+07	8.63015e+07	7.50016e+07	5.28776e+07	5.67754e+07	3.74148e+07	5.76927e+07	5.70961e+07	5.7692e+07
PC(16:0/18:1)+HCOO	PC(34:1)+HCOO	PC	(16:0/18:1)	(16:0)	(18:1)			C43 H83 O10 N1 P1	804.576	11.5373	0.00227361	3.13294e+08	3.13902e+08	3.38471e+08	2.36241e+08	3.92554e+08	5.67493e+08	4.27774e+08	4.68602e+08	3.92344e+08	3.18783e+08	360963011	3.60951e+08	3.6238e+08
PC(18:0/16:0)+HCOO	PC(34:0)+HCOO	PC	(18:0/16:0)	(18:0)	(16:0)			C43 H85 O10 N1 P1	806.592	12.4317	0.00211139	4.70357e+07	4.17343e+07	3.93454e+07	3.28274e+07	4.4305e+07	4.71611e+07	4.21536e+07	4.02269e+07	3.10113e+07	3.22045e+07	3.92096e+07	3.93212e+07	3.93718e+07
PS(38:5)-H	PS(38:5)-H	PS	(38:5)	(38:5)				C44 H75 O10 N1 P1	808.513	11.1409	0.00884762	2.75821e+06	2.05036e+06	2.10797e+06	3.70532e+06	3.97198e+06	7.34999e+06	4.41211e+06	4.37695e+06	3.10098e+06	3.00924e+06	3.48258e+06	3.53023e+06	3.5411e+06
PS(18:0/20:4)-H	PS(38:4)-H	PS	(18:0/20:4)	(18:0)	(20:4)			C44 H77 O10 N1 P1	810.529	12.032	0.0136504	1.52882e+07	1.57928e+07	1.85567e+07	1.89149e+07	3.33782e+07	3.586e+07	3.10422e+07	1.69457e+07	1.70884e+07	1.25714e+07	1.50695e+07	1.4713e+07	1.50632e+07
PS(18:0/20:4)-H	PS(38:4)-H	PS	(18:0/20:4)	(18:0)	(20:4)			C44 H77 O10 N1 P1	810.529	10.7083	0.0237479	4.7535e+07	5.81339e+07	4.28016e+07	2.49413e+07	40584802	6.89014e+07	5.27916e+07	4.91137e+07	4.25505e+07	2.91509e+07	3.3517e+07	3.216e+07	3.35232e+07
PS(18:0/20:4)-H	PS(38:4)-H	PS	(18:0/20:4)	(18:0)	(20:4)			C44 H77 O10 N1 P1	810.529	11.6618	0.0114972	2.71338e+07	3.39346e+07	3.52687e+07	3.58275e+07	3.16356e+07	3.43e+07	3.63983e+07	3.80782e+07	2.4718e+07	2.24427e+07	2.26875e+07	2.22866e+07	2.27729e+07
PC(16:0p/20:4)+HCOO	PC(36:4p)+HCOO	PC	(16:0p/20:4)	(16:0p)	(20:4)			C45 H81 O9 N1 P1	810.565	11.0344	0.00203824	9.58965e+07	1.11046e+08	9.91411e+07	6.06116e+07	8.42469e+07	6.95867e+07	8.9108e+07	7.79715e+07	5.49724e+07	4.38429e+07	7.25628e+07	7.2563e+07	7.28194e+07
LPC(18:1)+HCOO	LPC(18:1)+HCOO	LPC	(18:1)	(18:1)				C27 H53 O9 N1 P1	566.346	2.77102	0.00641911	1.16591e+06	355328	387692	884138	860160	1.37318e+07	4.66519e+06	1.27149e+06	5.92759e+06	2.87287e+06	3.68875e+06	3.68872e+06	3.64788e+06
PS(18:0/20:3)-H	PS(38:3)-H	PS	(18:0/20:3)	(18:0)	(20:3)			C44 H79 O10 N1 P1	812.545	11.1296	0.00828008	1.02115e+07	1.32456e+07	1.088e+07	9.51494e+06	1.47253e+07	2.92002e+07	2.51546e+07	1.84359e+07	1.53726e+07	1.74234e+07	1.31502e+07	1.29644e+07	1.29624e+07
PS(38:3)-H	PS(38:3)-H	PS	(38:3)	(38:3)				C44 H79 O10 N1 P1	812.545	12.8198	0.00477956	2.16295e+07	2.45117e+07	3.26044e+07	1.94246e+07	3.14398e+07	2.70856e+07	2.07713e+07	2.48876e+07	1.98394e+07	1.14688e+07	2.128e+07	2.14624e+07	2.1292e+07
PS(18:0/20:3)-H	PS(38:3)-H	PS	(18:0/20:3)	(18:0)	(20:3)			C44 H79 O10 N1 P1	812.545	11.4659	0.0165162	8.68548e+06	9.9699e+06	8.06696e+06	6.02934e+06	1.23527e+07	1.27767e+07	1.61036e+07	1.21972e+07	1.02065e+07	9.08803e+06	8.33756e+06	8.34017e+06	8.5797e+06
PC(16:0p/20:3)+HCOO	PC(36:3p)+HCOO	PC	(16:0p/20:3)	(16:0p)	(20:3)			C45 H83 O9 N1 P1	812.581	11.4645	0.00598134	4.44681e+06	4.63839e+06	5.0274e+06	4.38034e+06	6.60011e+06	1.09462e+07	7.80963e+06	7.08838e+06	5.25309e+06	6.63507e+06	5.87648e+06	5.93795e+06	5.87724e+06
PC(16:0e/20:4)+HCOO	PC(36:4e)+HCOO	PC	(16:0e/20:4)	(16:0e)	(20:4)			C45 H83 O9 N1 P1	812.581	11.2067	0.00453458	1.62016e+07	1.70483e+07	1.66986e+07	1.44476e+07	1.50045e+07	3.98044e+07	2.77093e+07	2.28677e+07	2.03374e+07	1.6878e+07	2.07753e+07	2.07751e+07	2.09388e+07
PS(18:0/20:2)-H	PS(38:2)-H	PS	(18:0/20:2)	(18:0)	(20:2)			C44 H81 O10 N1 P1	814.56	11.7748	0.00713961	7.1726e+06	8.54402e+06	5.56052e+06	5.03295e+06	1.25461e+07	4.1613e+06	9.63737e+06	9.70929e+06	3.23388e+06	7.37571e+06	6.87092e+06	6.95651e+06	6.87145e+06
PC(18:0p/18:2)+HCOO	PC(36:2p)+HCOO	PC	(18:0p/18:2)	(18:0p)	(18:2)			C45 H85 O9 N1 P1	814.597	11.4381	0.0215177	2.32273e+06	2.26744e+06	2.13666e+06	3.0964e+06	2.82942e+06	1.55521e+07	1.03738e+07	4.53765e+06	6.90349e+06	8.31977e+06	5.42395e+06	5.42396e+06	5.22429e+06
PC(18:1p/18:1)+HCOO	PC(36:2p)+HCOO	PC	(18:1p/18:1)	(18:1p)	(18:1)			C45 H85 O9 N1 P1	814.597	12.0675	0.00264096	3.21986e+06	4.56812e+06	5.29743e+06	2.5391e+06	5.09829e+06	6.99832e+06	3.50969e+06	4.59439e+06	3.79813e+06	2.92279e+06	3.56884e+06	3.5853e+06	3.56905e+06
PS(40:7p)-H	PS(40:7p)-H	PS	(40:7p)	(40:7p)				C46 H75 O9 N1 P1	816.518	11.413	0.0119453	6.24786e+07	7.04255e+07	6.90029e+07	4.29595e+07	6.21941e+07	5.44531e+07	5.07898e+07	5.96362e+07	5.36213e+07	3.63909e+07	5.24886e+07	5.14158e+07	5.1419e+07
PS(40:7p)-H	PS(40:7p)-H	PS	(40:7p)	(40:7p)				C46 H75 O9 N1 P1	816.518	11.7196	0.0207831	7.18838e+06	6.91973e+06	7.14612e+06	4.16879e+06	8.0757e+06	6.88539e+06	6.65033e+06	8.75756e+06	6.16035e+06	4.33649e+06	6.05879e+06	6.28131e+06	6.28318e+06
LPC(18:0)+HCOO	LPC(18:0)+HCOO	LPC	(18:0)	(18:0)				C27 H55 O9 N1 P1	568.362	4.07091	0.00319876	8.73011e+06	7.79414e+06	5.42462e+06	6.17974e+06	7.24804e+06	4.22805e+07	1.84255e+07	1.3364e+07	2.87882e+07	7.07367e+06	1.45721e+07	1.44916e+07	1.44917e+07
PS(20:0/18:1)-H	PS(38:1)-H	PS	(20:0/18:1)	(20:0)	(18:1)			C44 H83 O10 N1 P1	816.576	12.5715	0.0558313	6.36331e+06	5.88103e+06	7.43733e+06	5.60553e+06	8.07229e+06	6.64438e+06	5.65621e+06	6.8733e+06	4.35461e+06	2.84825e+06	4.41205e+06	4.41074e+06	3.99813e+06
PC(17:0/18:2)+HCOO	PC(35:2)+HCOO	PC	(17:0/18:2)	(17:0)	(18:2)			C44 H83 O10 N1 P1	816.576	11.1466	0.0124964	4.0626e+06	4.30909e+06	3.90352e+06	4.06339e+06	5.23356e+06	5.29067e+06	6.46866e+06	3.91814e+06	3.94403e+06	3.20318e+06	4.18368e+06	4.18417e+06	4.27514e+06
PC(18:0p/18:1)+HCOO	PC(36:1p)+HCOO	PC	(18:0p/18:1)	(18:0p)	(18:1)			C45 H87 O9 N1 P1	816.612	12.1881	0.00223742	3.79405e+06	4.05626e+06	4.97069e+06	3.91628e+06	5.60805e+06	1.89242e+07	8.22011e+06	8.05865e+06	8.52585e+06	9.81473e+06	6.72999e+06	6.72985e+06	6.75604e+06
SM(d39:1)+HCOO	SM(d39:1)+HCOO	SM	(d39:1)	(d39:1)				C45 H90 O8 N2 P1	817.644	13.05	0.016412	2.4056e+06	2.67709e+06	2.2395e+06	2.19395e+06	3.03298e+06	3.12706e+06	2.8408e+06	2.42288e+06	2.24355e+06	1.37355e+06	2.51563e+06	2.51563e+06	2.44479e+06
PS(40:6p)-H	PS(40:6p)-H	PS	(40:6p)	(40:6p)				C46 H77 O9 N1 P1	818.534	12.0517	0.00624408	2.13927e+07	2.24832e+07	2.26467e+07	1.40436e+07	2.53316e+07	1.87993e+07	2.00745e+07	1.91717e+07	1.52418e+07	1.20804e+07	1.76563e+07	1.78487e+07	1.78486e+07
PC(17:0/18:1)+HCOO	PC(35:1)+HCOO	PC	(17:0/18:1)	(17:0)	(18:1)			C44 H85 O10 N1 P1	818.592	11.9598	0.00764933	1.21806e+07	1.40938e+07	1.18891e+07	9.43377e+06	2.00595e+07	1.34582e+07	9.45412e+06	1.59596e+07	1.26138e+07	9.38149e+06	1.14706e+07	1.14706e+07	1.16233e+07
PC(16:0/20:4)+HCOO	PC(36:4)+HCOO	PC	(16:0/20:4)	(16:0)	(20:4)			C45 H81 O10 N1 P1	826.56	10.5911	0.00172789	9.53101e+07	9.7932e+07	8.14599e+07	6.47229e+07	8.60832e+07	1.13932e+08	112205959	9.9691e+07	8.9642e+07	7.97154e+07	9.04977e+07	9.07691e+07	9.0769e+07
SM(d40:3)+HCOO	SM(d40:3)+HCOO	SM	(d40:3)	(d40:3)				C46 H88 O8 N2 P1	827.628	11.6477	0.0207287	2.96127e+06	3.94793e+06	3.04337e+06	2.01336e+06	2.65649e+06	5.45384e+06	3.79425e+06	2.84979e+06	4.27374e+06	2.52662e+06	3.23064e+06	3.11599e+06	3.23057e+06
PC(16:0/20:3)+HCOO	PC(36:3)+HCOO	PC	(16:0/20:3)	(16:0)	(20:3)			C45 H83 O10 N1 P1	828.576	11.3131	0.0032045	8.90919e+06	8.61537e+06	7.22706e+06	5.52871e+06	9.51455e+06	1.21497e+07	1.05951e+07	1.01362e+07	7.78708e+06	7.56164e+06	8.3193e+06	8.36556e+06	8.36573e+06
Cer(d18:2/16:0)+HCOO	Cer(d34:2)+HCOO	Cer	(d18:2/16:0)	(d18:2)	(16:0)			C35 H66 O5 N1	580.495	10.8423	0.00335822	1.22358e+08	1.16442e+08	1.37049e+08	6.49268e+07	1.09854e+08	8.42652e+07	8.99092e+07	1.55504e+08	1.43277e+08	1.06019e+08	1.01991e+08	1.01988e+08	1.02584e+08
MGDG(18:1/22:5)-H	MGDG(40:6)-H	MGDG	(18:1/22:5)	(18:1)	(22:5)			C49 H81 O10	829.584	10.85	0.048633	1.53286e+07	8.49143e+06	1.60141e+07	1.69034e+07	1.08238e+07	2.24059e+07	2.97963e+07	1.15413e+07	1.39993e+07	1.90069e+07	1.54472e+07	1.42184e+07	1.4212e+07
SM(d40:2)+HCOO	SM(d40:2)+HCOO	SM	(d40:2)	(d40:2)				C46 H90 O8 N2 P1	829.644	12.5028	0.0440866	4.06538e+07	4.08578e+07	3.78291e+07	2.8867e+07	4.30459e+07	2.73008e+07	1.89319e+07	3.44312e+07	2.07929e+07	2.35184e+07	3.19575e+07	3.45334e+07	3.45239e+07
PC(18:1/18:1)+HCOO	PC(36:2)+HCOO	PC	(18:1/18:1)	(18:1)	(18:1)			C45 H85 O10 N1 P1	830.592	11.6148	0.00542166	1.76619e+08	1.72142e+08	1.83826e+08	2.40189e+08	2.12203e+08	4.23912e+08	2.68431e+08	2.86205e+08	2.13859e+08	1.89261e+08	2.19275e+08	2.17224e+08	2.17234e+08
SM(d40:1)+HCOO	SM(d40:1)+HCOO	SM	(d40:1)	(d40:1)				C46 H92 O8 N2 P1	831.66	13.5903	0.00116582	8.64282e+07	7.69981e+07	7.31004e+07	8.0392e+07	8.8955e+07	1.65234e+08	1.25509e+08	1.20084e+08	9.22621e+07	6.38636e+07	9.33849e+07	9.35389e+07	9.35955e+07
PS(20:3/20:4)-H	PS(40:7)-H	PS	(20:3/20:4)	(20:3)	(20:4)			C46 H75 O10 N1 P1	832.513	10.7164	0.0121146	6.41463e+06	9.71355e+06	7.33227e+06	4.44758e+06	6.6194e+06	7.37817e+06	7.47648e+06	7.35822e+06	6.54944e+06	4.84881e+06	5.32882e+06	5.44269e+06	5.44174e+06
PC(18:0/18:1)+HCOO	PC(36:1)+HCOO	PC	(18:0/18:1)	(18:0)	(18:1)			C45 H87 O10 N1 P1	832.607	12.5001	0.00154391	2.75861e+08	2.88575e+08	354555039	2.36899e+08	3.63973e+08	3.21008e+08	2.3745e+08	2.99283e+08	2.46679e+08	142669495	2.57542e+08	2.56847e+08	2.57529e+08
PI(16:0/18:2)-H	PI(34:2)-H	PI	(16:0/18:2)	(16:0)	(18:2)			C43 H78 O13 N0 P1	833.519	9.64943	0.00871366	1.29365e+06	1.37924e+06	1.5272e+06	1.72679e+06	2.45734e+06	5.84368e+06	3.25301e+06	2.03509e+06	2.4362e+06	1.85461e+06	2.07882e+06	2.07895e+06	2.11042e+06
SM(d40:0)+HCOO	SM(d40:0)+HCOO	SM	(d40:0)	(d40:0)				C46 H94 O8 N2 P1	833.675	14.0165	0.00661215	2.12046e+06	2.17263e+06	2.00734e+06	2.14571e+06	1.75941e+06	5.71182e+06	3.6784e+06	3.64779e+06	3.62705e+06	2.09513e+06	2.73555e+06	2.76234e+06	2.72779e+06
PS(40:6)-H	PS(40:6)-H	PS	(40:6)	(40:6)				C46 H77 O10 N1 P1	834.529	11.8546	0.00614038	5.00812e+07	6.07543e+07	5.50368e+07	3.45112e+07	4.97777e+07	5.54374e+07	5.1096e+07	5.17216e+07	5.1791e+07	3.39824e+07	4.63919e+07	4.63917e+07	4.68869e+07
PI(16:0/18:1)-H	PI(34:1)-H	PI	(16:0/18:1)	(16:0)	(18:1)			C43 H80 O13 N0 P1	835.534	10.4453	0.0087762	8.22766e+06	7.11142e+06	6.30649e+06	5.63666e+06	1.01802e+07	3.28478e+07	1.58674e+07	1.2484e+07	1.4391e+07	9.63892e+06	9.88817e+06	1.00398e+07	1.00402e+07
PS(40:5)-H	PS(40:5)-H	PS	(40:5)	(40:5)				C46 H79 O10 N1 P1	836.545	12.2641	0.0204418	4.55031e+06	4.43096e+06	4.00712e+06	3.7043e+06	5.86255e+06	8.99785e+06	6.66671e+06	4.95113e+06	5.3953e+06	4.68876e+06	4.96798e+06	4.79595e+06	4.79633e+06
PS(18:0/22:5)-H	PS(40:5)-H	PS	(18:0/22:5)	(18:0)	(22:5)			C46 H79 O10 N1 P1	836.545	10.729	0.0283716	7.03697e+06	8.46974e+06	8.49426e+06	5.45067e+06	1.00536e+07	8.99175e+06	5.83866e+06	5.88471e+06	5.41087e+06	4.55209e+06	5.28311e+06	5.01376e+06	5.25064e+06
PC(18:1p/20:4)+HCOO	PC(38:5p)+HCOO	PC	(18:1p/20:4)	(18:1p)	(20:4)			C47 H83 O9 N1 P1	836.581	11.0947	0.00584307	2.80137e+07	3.76114e+07	3.28629e+07	1.90924e+07	2.51644e+07	2.3517e+07	2.16666e+07	2.50681e+07	1.84896e+07	1.3825e+07	2.21283e+07	2.21271e+07	2.23524e+07
PI(18:0/16:0)-H	PI(34:0)-H	PI	(18:0/16:0)	(18:0)	(16:0)			C43 H82 O13 N0 P1	837.55	11.331	0.0122386	2.09051e+06	2.15166e+06	2.04141e+06	2.18117e+06	3.31639e+06	2.78144e+06	2.67005e+06	2.593e+06	2.52691e+06	1.35114e+06	1.85407e+06	1.89395e+06	1.89392e+06
PS(18:0/22:4)-H	PS(40:4)-H	PS	(18:0/22:4)	(18:0)	(22:4)			C46 H81 O10 N1 P1	838.56	11.3861	0.0404947	3.05885e+07	4.21684e+07	3.16086e+07	1.80177e+07	3.16802e+07	2.33596e+07	2.83015e+07	2.11532e+07	2.0294e+07	1.54883e+07	2.03111e+07	2.16044e+07	2.00393e+07
PC(18:0p/20:4)+HCOO	PC(38:4p)+HCOO	PC	(18:0p/20:4)	(18:0p)	(20:4)			C47 H85 O9 N1 P1	838.597	12.001	0.0774408	7.7852e+06	7.35663e+06	8.19659e+06	7.21996e+06	6.84453e+06	6.43837e+06	6.36637e+06	6.55045e+06	4.91724e+06	3.75135e+06	7.76292e+06	7.76702e+06	8.85524e+06
PC(16:0p/22:4)+HCOO	PC(38:4p)+HCOO	PC	(16:0p/22:4)	(16:0p)	(22:4)			C47 H85 O9 N1 P1	838.597	11.7256	0.0162824	9.5168e+06	1.06378e+07	9.71921e+06	5.77034e+06	9.30527e+06	7.92871e+06	8.85697e+06	1.0317e+07	6.15966e+06	5.18864e+06	8.09593e+06	8.08797e+06	8.32222e+06
PC(17:0/20:4)+HCOO	PC(37:4)+HCOO	PC	(17:0/20:4)	(17:0)	(20:4)			C46 H83 O10 N1 P1	840.576	11.0939	0.0117306	5.67341e+06	7.05986e+06	4.45412e+06	3.83035e+06	5.33887e+06	3.42309e+06	3.6769e+06	4.67267e+06	4.45067e+06	2.46111e+06	4.61279e+06	4.52013e+06	4.52052e+06
PC(18:0e/20:4)+HCOO	PC(38:4e)+HCOO	PC	(18:0e/20:4)	(18:0e)	(20:4)			C47 H87 O9 N1 P1	840.612	12.1654	0.0027482	1.50104e+07	7.98446e+06	5.40835e+06	1.33638e+07	6.50741e+06	1.25131e+07	9.98097e+06	8.43244e+06	6.86648e+06	6.97392e+06	7.45217e+06	7.41684e+06	7.45234e+06
PC(16:0e/22:4)+HCOO	PC(38:4e)+HCOO	PC	(16:0e/22:4)	(16:0e)	(22:4)			C47 H87 O9 N1 P1	840.612	11.8889	0.0143145	5.60226e+06	5.57646e+06	4.78176e+06	4.03548e+06	5.09131e+06	1.12792e+07	6.56901e+06	6.92411e+06	6.06941e+06	5.93317e+06	5.93152e+06	5.78569e+06	5.93158e+06
PS(18:1/22:1)-H	PS(40:2)-H	PS	(18:1/22:1)	(18:1)	(22:1)			C46 H85 O10 N1 P1	842.592	12.554	0.11388	3.61483e+06	3.93295e+06	5.6764e+06	4.86503e+06	6.93655e+06	6.91476e+06	3.34015e+06	4.59135e+06	3.23189e+06	3.33846e+06	2.95969e+06	3.59218e+06	2.97245e+06
SM(d41:2)+HCOO	SM(d41:2)+HCOO	SM	(d41:2)	(d41:2)				C47 H92 O8 N2 P1	843.66	12.9764	0.00296176	5.01654e+06	6.65741e+06	3.81123e+06	3.11308e+06	4.86627e+06	6.61668e+06	4.46774e+06	6.51519e+06	5.90704e+06	2.81943e+06	4.68568e+06	4.66181e+06	4.68594e+06
PS(18:1/22:0)-H	PS(40:1)-H	PS	(18:1/22:0)	(18:1)	(22:0)			C46 H87 O10 N1 P1	844.607	13.5617	0.0706328	3.68814e+06	5.36484e+06	5.69075e+06	5.60664e+06	1.0333e+07	4.00752e+06	4.86968e+06	4.5864e+06	2.6906e+06	3.25284e+06	3.17108e+06	3.59371e+06	3.59325e+06
SM(d41:1)+HCOO	SM(d41:1)+HCOO	SM	(d41:1)	(d41:1)				C47 H94 O8 N2 P1	845.675	14.1575	0.0069801	1.01477e+07	1.22948e+07	9.20632e+06	1.03916e+07	1.27794e+07	1.60761e+07	1.58456e+07	1.36547e+07	1.12779e+07	8.31767e+06	1.19348e+07	1.17914e+07	1.19354e+07
PC(18:2/20:4)+HCOO	PC(38:6)+HCOO	PC	(18:2/20:4)	(18:2)	(20:4)			C47 H81 O10 N1 P1	850.56	9.83443	0.0113077	4.48561e+06	4.58057e+06	5.36301e+06	3.78763e+06	4.89085e+06	8.78945e+06	6.71375e+06	4.5203e+06	4.86825e+06	3.4458e+06	5.33326e+06	5.33342e+06	5.22956e+06
PC(18:1/20:4)+HCOO	PC(38:5)+HCOO	PC	(18:1/20:4)	(18:1)	(20:4)			C47 H83 O10 N1 P1	852.576	10.6692	0.00143374	3.88013e+07	4.09499e+07	4.04044e+07	2.65754e+07	3.71555e+07	6.28685e+07	5.52369e+07	4.80778e+07	4.60277e+07	3.08882e+07	4.02187e+07	4.01189e+07	4.01191e+07
SM(d22:0/20:4)+HCOO	SM(d42:4)+HCOO	SM	(d22:0/20:4)	(d22:0)	(20:4)			C48 H90 O8 N2 P1	853.644	11.7251	0.0764616	5.17834e+06	7.8018e+06	6.88888e+06	5.23449e+06	4.97698e+06	7.50657e+06	3.01022e+06	7.37766e+06	4.661e+06	5.21095e+06	5.42682e+06	6.21669e+06	6.21354e+06
PS(41:3)-H	PS(41:3)-H	PS	(41:3)	(41:3)				C47 H85 O10 N1 P1	854.592	11.066	0.00924428	5.43681e+06	9.62273e+06	2.46877e+07	1.02672e+07	7.55078e+06	2.90164e+07	2.22065e+07	1.12071e+07	1.48989e+07	2.01499e+07	1.51527e+07	1.49119e+07	1.51537e+07
LPC(20:4)+HCOO	LPC(20:4)+HCOO	LPC	(20:4)	(20:4)				C29 H51 O9 N1 P1	588.331	2.14816	0.00493366	989048	1.29727e+06	853739	880995	1.07503e+06	4.29453e+06	1.64388e+06	1.64802e+06	1.50928e+06	1.08073e+06	1.69445e+06	1.68948e+06	1.7058e+06
SM(d22:1/20:2)+HCOO	SM(d42:3)+HCOO	SM	(d22:1/20:2)	(d22:1)	(20:2)			C48 H92 O8 N2 P1	855.66	12.5761	0.00347642	1.00947e+08	1.20707e+08	1.08841e+08	6.49429e+07	1.00809e+08	9.05127e+07	59250484	9.98055e+07	6.98275e+07	5.24416e+07	8.16387e+07	8.16365e+07	8.21301e+07
PC(18:0/20:3)+HCOO	PC(38:3)+HCOO	PC	(18:0/20:3)	(18:0)	(20:3)			C47 H87 O10 N1 P1	856.607	12.282	0.00847565	14699851	1.37323e+07	1.22757e+07	7.73171e+06	1.58836e+07	1.49015e+07	9.2457e+06	1.89439e+07	1.13384e+07	9.50045e+06	1.26866e+07	1.26833e+07	1.28721e+07
PI(16:0/20:4)-H	PI(36:4)-H	PI	(16:0/20:4)	(16:0)	(20:4)			C45 H78 O13 N0 P1	857.519	9.49	0.00113334	3.35828e+06	4.30642e+06	3.87054e+06	3.35374e+06	5.71211e+06	9.11196e+06	8.24723e+06	6.32596e+06	5.9253e+06	4.78403e+06	5.40577e+06	5.40579e+06	5.4164e+06
SM(d22:1/20:1)+HCOO	SM(d42:2)+HCOO	SM	(d22:1/20:1)	(d22:1)	(20:1)			C48 H94 O8 N2 P1	857.675	13.5049	0.00290847	1.85138e+08	2.01686e+08	1.81908e+08	1.31445e+08	1.82521e+08	3.11492e+08	218580855	2.47105e+08	2.23168e+08	1.49608e+08	1.94278e+08	1.94274e+08	1.95256e+08
PC(20:1/18:1)+HCOO	PC(38:2)+HCOO	PC	(20:1/18:1)	(20:1)	(18:1)			C47 H89 O10 N1 P1	858.623	12.5881	0.0474587	1.37141e+07	1.59855e+07	1.78868e+07	1.26996e+07	1.88348e+07	1.49693e+07	1.05905e+07	1.02301e+07	9.77962e+06	8.20738e+06	1.43911e+07	1.43952e+07	1.32416e+07
PI(18:1/18:2)-H	PI(36:3)-H	PI	(18:1/18:2)	(18:1)	(18:2)			C45 H80 O13 N0 P1	859.534	9.75865	0.00767833	1.95444e+06	1.83527e+06	2.1671e+06	2.237e+06	2.75036e+06	4.89064e+06	3.17971e+06	1.49669e+06	2.00863e+06	1.85985e+06	2.13258e+06	2.16108e+06	2.1326e+06
SM(d42:1)+HCOO	SM(d42:1)+HCOO	SM	(d42:1)	(d42:1)				C48 H96 O8 N2 P1	859.691	14.7413	0.00176658	1.10865e+08	1.08139e+08	8.53336e+07	101973106	1.02743e+08	1.44558e+08	1.31637e+08	126049740	8.31405e+07	8.10636e+07	1.01288e+08	1.01222e+08	101559700
SM(d42:1)+HCOO	SM(d42:1)+HCOO	SM	(d42:1)	(d42:1)				C48 H96 O8 N2 P1	859.691	13.929	0.0122827	4.6384e+06	6.27761e+06	5.32567e+06	3.90974e+06	4.14643e+06	1.07575e+07	7.28926e+06	6.83229e+06	8.17469e+06	4.47648e+06	5.81674e+06	5.8174e+06	5.69419e+06
PI(18:0/18:2)-H	PI(36:2)-H	PI	(18:0/18:2)	(18:0)	(18:2)			C45 H82 O13 N0 P1	861.55	10.5259	0.118983	2.85004e+06	1.10197e+07	1.08928e+07	2.7479e+06	4.72858e+06	4.48721e+07	6.61676e+06	5.79522e+06	1.62971e+07	4.65615e+06	8.44913e+06	6.92881e+06	6.90783e+06
Cer(d18:2/20:0)-H	Cer(d38:2)-H	Cer	(d18:2/20:0)	(d18:2)	(20:0)			C38 H72 O3 N1	590.552	12.941	0.00784283	2.20278e+06	1.89314e+06	1.96789e+06	750815	1.35053e+06	589914	667584	1.04206e+06	1.05866e+06	646510	1.09671e+06	1.09676e+06	1.0819e+06
FA(20:4)-H	FA(20:4)-H	FA	(20:4)	(20:4)				O2 H31 C20	303.233	4.6645	0.00822205	5.91149e+06	7.00545e+06	5.67854e+06	4.47602e+06	5.40201e+06	1.26863e+07	9.3963e+06	6.88004e+06	1.29313e+07	6.11553e+06	7.64237e+06	7.75286e+06	7.75162e+06
PS(42:6)-H	PS(42:6)-H	PS	(42:6)	(42:6)				C48 H81 O10 N1 P1	862.56	12.5233	0.00783666	1.44416e+07	1.6974e+07	1.53597e+07	8.20969e+06	1.34821e+07	1.06392e+07	9.99143e+06	9.22325e+06	9.3433e+06	5.52675e+06	1.05479e+07	1.04056e+07	1.05483e+07
PI(18:0/18:1)-H	PI(36:1)-H	PI	(18:0/18:1)	(18:0)	(18:1)			C45 H84 O13 N0 P1	863.566	11.4058	0.0146873	1.03414e+07	1.201e+07	1.33765e+07	9.71958e+06	1.59073e+07	1.93341e+07	1.35014e+07	1.35111e+07	1.65676e+07	7.38811e+06	1.16474e+07	1.13532e+07	1.16465e+07
PC(18:0p/22:5)+HCOO	PC(40:5p)+HCOO	PC	(18:0p/22:5)	(18:0p)	(22:5)			C49 H87 O9 N1 P1	864.612	11.2639	0.112354	888709	1.03941e+06	1.18004e+06	921476	1.03237e+06	3.33662e+06	1.38707e+06	1.12406e+06	1.20597e+06	1.78205e+06	1.80123e+06	1.79249e+06	2.17071e+06
PC(18:0p/22:4)+HCOO	PC(40:4p)+HCOO	PC	(18:0p/22:4)	(18:0p)	(22:4)			C49 H89 O9 N1 P1	866.628	11.9126	0.00868306	2.91901e+06	3.13078e+06	2.80671e+06	2.1327e+06	2.71243e+06	1.26653e+07	4.23045e+06	3.43724e+06	4.09859e+06	5.34678e+06	4.24436e+06	4.18108e+06	4.18124e+06
PI(18:0p/20:4)-H	PI(38:4p)-H	PI	(18:0p/20:4)	(18:0p)	(20:4)			C47 H82 O12 N0 P1	869.555	10.1287	0.00863759	2.76181e+06	3.63401e+06	2.88584e+06	2.37186e+06	2.66858e+06	9.78492e+06	6.05274e+06	5.08025e+06	4.80723e+06	4.75095e+06	4.14468e+06	4.14508e+06	4.08318e+06
PS(18:1/24:1)-H	PS(42:2)-H	PS	(18:1/24:1)	(18:1)	(24:1)			C48 H89 O10 N1 P1	870.623	13.512	0.0362802	846299	2.58339e+06	1.72655e+06	1.41339e+06	2.5734e+06	1.63426e+06	642697	1.83139e+06	977556	922924	972281	1.03464e+06	972202
SM(d43:2)+HCOO	SM(d43:2)+HCOO	SM	(d43:2)	(d43:2)				C49 H96 O8 N2 P1	871.691	14.0578	0.0127529	1.95445e+06	2.39272e+06	1.62661e+06	1.42014e+06	2.20118e+06	2.8737e+06	2.2124e+06	2.9006e+06	2.6824e+06	1.35771e+06	2.07485e+06	2.12094e+06	2.07469e+06
PC(18:0/22:6)+HCOO	PC(40:6)+HCOO	PC	(18:0/22:6)	(18:0)	(22:6)			C49 H85 O10 N1 P1	878.592	11.2911	0.00577003	5.64749e+06	5.59185e+06	4.84527e+06	4.26475e+06	4.54183e+06	1.5448e+07	1.05843e+07	8.72822e+06	8.992e+06	6.06017e+06	7.27587e+06	7.20315e+06	7.27538e+06
PC(18:0/22:5)+HCOO	PC(40:5)+HCOO	PC	(18:0/22:5)	(18:0)	(22:5)			C49 H87 O10 N1 P1	880.607	11.5297	0.00832211	1.26628e+07	1.3183e+07	1.45939e+07	9.69525e+06	1.42347e+07	1.22848e+07	1.09896e+07	8.92185e+06	1.00174e+07	1.21444e+07	1.114e+07	1.09564e+07	1.10403e+07
PC(18:0/22:4)+HCOO	PC(40:4)+HCOO	PC	(18:0/22:4)	(18:0)	(22:4)			C49 H89 O10 N1 P1	882.623	12.2323	0.00387242	2.64392e+07	2.91982e+07	2.58165e+07	1.65109e+07	2.3287e+07	2.04097e+07	1.93749e+07	1.64353e+07	1.67486e+07	1.07604e+07	1.89786e+07	1.89787e+07	1.91062e+07
Cer(d34:2+hO)+HCOO	Cer(d34:2+hO)+HCOO	Cer	(d18:1+hO/16:1)	(d18:1+hO)	(16:1)			C35 H66 O6 N1	596.49	10.4069	0.0209305	7.40795e+06	8.35859e+06	2.75783e+06	2.74784e+06	6.83577e+06	787394	1.3901e+06	7.98932e+06	6.87072e+06	1.84406e+06	4.01458e+06	4.01933e+06	4.1643e+06
PI(18:1/20:4)-H	PI(38:5)-H	PI	(18:1/20:4)	(18:1)	(20:4)			C47 H80 O13 N0 P1	883.534	9.5856	0.000927797	8.1478e+06	9.33464e+06	1.05151e+07	6.6945e+06	1.21472e+07	1.76524e+07	1.44019e+07	1.14681e+07	1.09364e+07	7.65747e+06	9.96471e+06	9.96469e+06	9.98072e+06
SM(d44:3)+HCOO	SM(d44:3)+HCOO	SM	(d44:3)	(d44:3)				C50 H96 O8 N2 P1	883.691	13.6019	0.00288355	3.56761e+06	3.94357e+06	2.96076e+06	2.27355e+06	2.8552e+06	3.28777e+06	2.67922e+06	3.06176e+06	2.44991e+06	1.92801e+06	2.82898e+06	2.84308e+06	2.82888e+06
PI(18:0/20:4)-H	PI(38:4)-H	PI	(18:0/20:4)	(18:0)	(20:4)			C47 H82 O13 N0 P1	885.55	10.526	0.00675548	2.07296e+08	2.5318e+08	2.56657e+08	1.84846e+08	259079153	2.99333e+08	2.79209e+08	269108707	2.26586e+08	1.43791e+08	2.10402e+08	2.10418e+08	2.12882e+08
SM(d44:2)+HCOO	SM(d44:2)+HCOO	SM	(d44:2)	(d44:2)				C50 H98 O8 N2 P1	885.707	14.6266	0.00846145	2.3551e+06	3.32437e+06	2.19907e+06	2.13195e+06	2.37458e+06	4.67142e+06	3.38387e+06	3.79203e+06	3.00132e+06	2.38829e+06	2.65179e+06	2.65195e+06	2.69093e+06
PI(18:0/20:3)-H	PI(38:3)-H	PI	(18:0/20:3)	(18:0)	(20:3)			C47 H84 O13 N0 P1	887.566	11.2227	0.0154748	7.87449e+06	1.00724e+07	8.60346e+06	4.20806e+06	1.16632e+07	8.02699e+06	5.81888e+06	1.42444e+07	7.10719e+06	5.34499e+06	6.61097e+06	6.75886e+06	6.56119e+06
PI(18:0/20:3)-H	PI(38:3)-H	PI	(18:0/20:3)	(18:0)	(20:3)			C47 H84 O13 N0 P1	887.566	10.9226	0.00808364	5.35294e+06	7.0799e+06	6.19449e+06	6.97069e+06	8.95569e+06	1.78602e+07	1.2617e+07	8.94353e+06	8.59008e+06	8.81505e+06	8.31664e+06	8.20068e+06	8.31652e+06
PI(18:0/22:6)-H	PI(40:6)-H	PI	(18:0/22:6)	(18:0)	(22:6)			C49 H82 O13 N0 P1	909.55	10.2871	0.0059671	2.11122e+06	1.7797e+06	2.07757e+06	1.38647e+06	2.25996e+06	741823	789435	1.40775e+06	775291	792792	1.39546e+06	1.39548e+06	1.40994e+06
PI(18:0/22:5)-H	PI(40:5)-H	PI	(18:0/22:5)	(18:0)	(22:5)			C49 H84 O13 N0 P1	911.566	10.5372	0.016715	2.80058e+06	3.94083e+06	4.20236e+06	2.67726e+06	3.64232e+06	3.99831e+06	2.98243e+06	2.46464e+06	2.19155e+06	1.4281e+06	2.99833e+06	2.91324e+06	2.9131e+06
PI(18:0/22:4)-H	PI(40:4)-H	PI	(18:0/22:4)	(18:0)	(22:4)			C49 H86 O13 N0 P1	913.581	11.1846	0.00794891	6.70964e+06	1.00084e+07	7.55134e+06	5.28654e+06	6.74157e+06	7.8638e+06	6.58416e+06	5.2607e+06	6.72705e+06	3.39163e+06	5.75565e+06	5.66816e+06	5.73334e+06
Cer(d18:1/17:0)+HCOO	Cer(d35:1)+HCOO	Cer	(d18:1/17:0)	(d18:1)	(17:0)			C36 H70 O5 N1	596.526	12.3009	0.0254343	1.92782e+07	2.10914e+07	1.67393e+07	1.60621e+07	1.6493e+07	1.32072e+07	1.87738e+07	2.10824e+07	2.47294e+07	1.54393e+07	1.78161e+07	1.70334e+07	1.77965e+07
GM3(d34:1)-H	GM3(d34:1)-H	GM3	(d34:1)	(d34:1)				C57 H103 O21 N2	1151.71	9.11217	0.0179264	317928	429111	1.26788e+06	315187	684654	991340	674207	333917	679541	283644	592732	611350	592774
CL(18:2/18:2/18:2/18:2)-H	CL(72:8)-H	CL	(18:2/18:2/18:2/18:2)	(18:2)	(18:2)	(18:2)	(18:2)	C81 H141 O17 P2	1447.96	17.3694	0.0446214	2.05472e+06	2.43629e+06	3.17344e+06	3.14396e+06	3.00242e+06	4.38885e+06	4.15048e+06	2.72162e+06	1.53887e+06	2.09815e+06	2823627	2.70044e+06	2.95258e+06
So(d16:1)+H	So(d16:1)+H	So	(d16:1)	(d16:1)				C16 H34 O2 N1	272.258	1.81316	0.00138077	1.44687e+07	1.27838e+07	1.34075e+07	1.2055e+07	1.04403e+07	1.1445e+07	1.30283e+07	1.00935e+07	1.08187e+07	9.84114e+06	1.13673e+07	1.13953e+07	1.13937e+07
So(d18:1)+H	So(d18:1)+H	So	(d18:1)	(d18:1)				C18 H38 O2 N1	300.29	2.55874	0.0121346	1.75487e+06	1.96736e+06	2.11378e+06	1.52345e+06	1.50294e+06	6.38328e+06	4.17366e+06	3.53669e+06	2.8607e+06	2.78917e+06	3.0018e+06	3.02133e+06	2.95101e+06
Cer(d18:0)+H	Cer(d18:0)+H	Cer	(d18:0)	(d18:0)				C18 H38 O3 N1	316.285	1.70869	0.00997691	6.09702e+06	6.59834e+06	5.9672e+06	4.48652e+06	5.48784e+06	5.4711e+06	6.83539e+06	4.51481e+06	5.59659e+06	5.47881e+06	5.6925e+06	5.79119e+06	5.79281e+06
AcCa(16:0)+H	AcCa(16:0)+H	AcCa	(16:0)	(16:0)				C23 H46 O4 N1	400.342	2.72262	0.0065789	2.20539e+06	1.50851e+06	2.21313e+06	3.5486e+06	6.17168e+06	1.00871e+07	1.1439e+07	6.54003e+06	3.31931e+06	7.86993e+06	5.79242e+06	5.79221e+06	5.85857e+06
LPE(16:0)+H	LPE(16:0)+H	LPE	(16:0)	(16:0)				C21 H45 O7 N1 P1	454.293	2.97862	0.0126289	960642	250473	210206	475264	633217	8.57575e+06	1.01685e+06	805709	2.42356e+06	410351	1.06992e+06	1.06885e+06	1.04618e+06
Cer(d28:0)+H	Cer(d28:0)+H	Cer	(d28:0)	(d28:0)				C28 H58 O3 N1	456.441	6.78036	0.00743567	6.6888e+06	1.18167e+06	1.52088e+06	884062	1.19828e+06	6.76325e+06	5.21695e+06	5.55643e+06	4.4121e+06	3.91856e+06	4.04282e+06	4.10332e+06	4.07584e+06
LPE(18:2)+H	LPE(18:2)+H	LPE	(18:2)	(18:2)				C23 H45 O7 N1 P1	478.293	2.336	0.0487056	342130	59966.7	89282	828098	233359	1.47058e+06	526421	654584	1.2206e+06	247454	725299	791164	731019
LPE(18:1)+H	LPE(18:1)+H	LPE	(18:1)	(18:1)				C23 H47 O7 N1 P1	480.308	2.9473	0.0338068	621145	761450	923749	695992	1.16134e+06	4.10735e+06	1.25372e+06	1.79184e+06	4.06757e+06	702907	1.5034e+06	1.50344e+06	1.59321e+06
Cer(d16:0+pO/18:1)+HCOO	Cer(d34:1+pO)+HCOO	Cer	(d16:0+pO/18:1)	(d16:0+pO)	(18:1)			C35 H68 O6 N1	598.505	11.3339	0.0257499	2.39062e+07	2.33208e+07	1.50698e+07	2.16786e+07	1.85538e+07	1.30873e+07	2.21184e+07	3.30974e+07	3.09626e+07	1.31837e+07	2.04242e+07	2.13698e+07	2.1356e+07
LPC(16:0p)+H	LPC(16:0p)+H	LPC	(16:0p)	(16:0p)				C24 H51 O6 N1 P1	480.345	3.18488	0.00614228	4.3006e+06	4.15235e+06	3.25572e+06	2.70601e+06	3.97148e+06	1.2285e+07	5.81204e+06	5.97993e+06	6.22235e+06	2.9414e+06	5.41608e+06	5.47405e+06	5.47417e+06
LPE(18:0)+H	LPE(18:0)+H	LPE	(18:0)	(18:0)				C23 H49 O7 N1 P1	482.324	4.34219	0.00275363	9.84846e+06	6.92156e+06	5.07059e+06	5.12624e+06	7.29349e+06	2.80075e+07	9.42536e+06	9.04957e+06	2.23249e+07	3.73048e+06	1.01053e+07	1.01557e+07	1.01512e+07
LPC(16:0e)+H	LPC(16:0e)+H	LPC	(16:0e)	(16:0e)				C24 H53 O6 N1 P1	482.361	3.31803	0.0047134	133304	1.17166e+06	763413	1.20253e+06	1.32471e+06	1.60224e+07	5.54854e+06	4.04282e+06	6.10908e+06	6.42911e+06	4.55981e+06	4.59737e+06	4.59711e+06
Cer(d30:0)+H	Cer(d30:0)+H	Cer	(d30:0)	(d30:0)				C30 H62 O3 N1	484.472	8.22005	0.00605767	1.02561e+07	3.67697e+06	4.20015e+06	3.09712e+06	3.5987e+06	9.60022e+06	1.07802e+07	8.17133e+06	5.48187e+06	5.62693e+06	6.16117e+06	6.22607e+06	6.16123e+06
LPC(16:1)+H	LPC(16:1)+H	LPC	(16:1)	(16:1)				C24 H49 O7 N1 P1	494.324	2.189	0.0380885	736931	349220	321718	243894	891950	4.77325e+06	2.22167e+06	1.49188e+06	2.33722e+06	1.82773e+06	1.81629e+06	1.81709e+06	1.69942e+06
LPC(16:0)+H	LPC(16:0)+H	LPC	(16:0)	(16:0)				C24 H51 O7 N1 P1	496.34	2.64761	0.00408303	2.61214e+06	2.51366e+06	1.74904e+06	1.94855e+06	3.10044e+06	2.90894e+07	7.71647e+06	5.31279e+06	8.92363e+06	4.58338e+06	6.74951e+06	6.70195e+06	6.70206e+06
LPE(20:4)+H	LPE(20:4)+H	LPE	(20:4)	(20:4)				C25 H45 O7 N1 P1	502.293	2.25911	0.00917747	8.4271e+06	7.95548e+06	7.68099e+06	7.96355e+06	8.67882e+06	1.49539e+07	1.15749e+07	1.07832e+07	8.75964e+06	8.23349e+06	1.06248e+07	1.0795e+07	1.07959e+07
LPE(18:0)+Na	LPE(18:0)+Na	LPE	(18:0)	(18:0)				C23 H48 O7 N1 P1 Na1	504.306	4.34219	0.0171848	938763	686621	426144	439880	623768	2.79154e+06	802427	847288	2.18157e+06	293184	1.00722e+06	1.00752e+06	977679
LPC(18:1p)+H	LPC(18:1p)+H	LPC	(18:1p)	(18:1p)				C26 H53 O6 N1 P1	506.361	3.33068	0.00466641	812463	791976	571576	450732	585378	3.27211e+06	1.10016e+06	1.1499e+06	1.54216e+06	739011	1.0873e+06	1.09612e+06	1.09615e+06
Cer(d32:3)+H	Cer(d32:3)+H	Cer	(d32:3)	(d32:3)				C32 H60 O3 N1	506.457	8.242	0.0134743	1.84126e+06	662172	382881	498177	559280	1.48644e+06	1.15752e+06	1.57437e+06	910656	1.6562e+06	1.07395e+06	1.04913e+06	1.04942e+06
LPI(18:0)-H	LPI(18:0)-H	LPI	(18:0)	(18:0)				C27 H52 O12 N0 P1	599.32	3.13804	0.00646852	1.02294e+06	1.46178e+06	1.25415e+06	1.00752e+06	1.24089e+06	1.97967e+06	1.20239e+06	1.72357e+06	1.58933e+06	751566	1.15812e+06	1.14521e+06	1.14528e+06
PE(19:1)+H	PE(19:1)+H	PE	(19:1)	(19:1)				C24 H47 O8 N1 P1	508.303	3.12936	0.0116897	1.35435e+06	1.5919e+06	2.01472e+06	1.40477e+06	2.16218e+06	1.87505e+06	2.39402e+06	2.91689e+06	1.59213e+06	1.21889e+06	2.05001e+06	2.0503e+06	2.09194e+06
LPC(18:0p)+H	LPC(18:0p)+H	LPC	(18:0p)	(18:0p)				C26 H55 O6 N1 P1	508.376	4.655	0.0308431	621691	584223	284927	490359	467071	1.89987e+06	754407	720778	983115	304195	806865	758647	785839
LPC(18:0p)+H	LPC(18:0p)+H	LPC	(18:0p)	(18:0p)				C26 H55 O6 N1 P1	508.376	3.48187	0.00425309	2.00013e+06	1.84787e+06	1.3394e+06	1.44182e+06	1.84218e+06	4.23847e+07	1.11677e+07	6.24864e+06	1.04003e+07	7.81571e+06	9.21243e+06	9.28065e+06	9.28061e+06
LPC(17:0)+H	LPC(17:0)+H	LPC	(17:0)	(17:0)				C25 H53 O7 N1 P1	510.355	3.36597	0.00120586	787664	866348	486171	421484	842275	3.42632e+06	1.39249e+06	1.02589e+06	2.07984e+06	467596	1.24607e+06	1.24867e+06	1.24868e+06
LPC(18:0e)+H	LPC(18:0e)+H	LPC	(18:0e)	(18:0e)				C26 H57 O6 N1 P1	510.392	4.87401	0.00603412	600303	515898	294669	691392	621956	5.44728e+06	2.13697e+06	1.57905e+06	2.32847e+06	1.09545e+06	1.72728e+06	1.74543e+06	1.72735e+06
Cer(d32:0)+H	Cer(d32:0)+H	Cer	(d32:0)	(d32:0)				C32 H66 O3 N1	512.504	9.66796	0.00121199	1.89499e+08	1.04655e+08	1.21471e+08	1.05845e+08	1.12057e+08	1.60964e+08	131487105	1.32579e+08	9.33391e+07	9.68839e+07	1.33142e+08	1.33142e+08	1.33421e+08
LPC(16:0)+Na	LPC(16:0)+Na	LPC	(16:0)	(16:0)				C24 H50 O7 N1 P1 Na1	518.322	2.64761	0.00200882	1.27839e+06	1.05947e+06	655917	767204	1.12665e+06	1.4463e+07	4.42769e+06	2.3523e+06	5.09103e+06	1.96595e+06	3.17707e+06	3.18817e+06	3.17713e+06
LPC(18:2)+H	LPC(18:2)+H	LPC	(18:2)	(18:2)				C26 H51 O7 N1 P1	520.34	2.26859	0.0090121	2.59143e+06	2.95172e+06	1.39491e+06	4.90743e+06	2.18615e+06	2.97763e+07	1.30972e+07	5.1164e+06	1.23849e+07	5.89344e+06	1.1396e+07	1.15758e+07	1.15757e+07
LPC(18:1)+H	LPC(18:1)+H	LPC	(18:1)	(18:1)				C26 H53 O7 N1 P1	522.355	2.76745	0.0456248	7.05481e+06	5.84363e+06	4.7098e+06	5.3043e+06	6.27789e+06	8.48609e+07	2.86563e+07	2.16378e+07	3.4246e+07	1.68156e+07	2.83317e+07	2.6145e+07	2.83202e+07
PC(17:0)+H	PC(17:0)+H	PC	(17:0)	(17:0)				C25 H51 O8 N1 P1	524.335	2.7826	0.0108773	3.39815e+06	4.43165e+06	3.15984e+06	1.64624e+06	3.68292e+06	3.13552e+06	4.30944e+06	3.86561e+06	2.17984e+06	3.06959e+06	3.35936e+06	3.42389e+06	3.42301e+06
Cer(d18:2/18:0)+HCOO	Cer(d36:2)+HCOO	Cer	(d18:2/18:0)	(d18:2)	(18:0)			C37 H70 O5 N1	608.526	11.8939	0.00609015	6.06138e+07	4.88913e+07	5.98451e+07	3.19423e+07	4.46344e+07	2.31094e+07	3.52432e+07	5.3457e+07	4.32908e+07	3.45365e+07	3.74184e+07	3.74248e+07	3.78177e+07
LPC(18:0)+H	LPC(18:0)+H	LPC	(18:0)	(18:0)				C26 H55 O7 N1 P1	524.371	4.06926	0.00152931	4.46161e+07	4.40865e+07	2.81701e+07	2.94903e+07	3.96281e+07	2.25132e+08	9.25701e+07	6.33959e+07	1.36721e+08	3.30468e+07	7.82422e+07	7.83763e+07	7.84813e+07
LPC(18:0)+H	LPC(18:0)+H	LPC	(18:0)	(18:0)				C26 H55 O7 N1 P1	524.371	3.75513	0.00219366	3.1822e+06	2.84452e+06	1.941e+06	2.20965e+06	2.07241e+06	1.80189e+07	8.74469e+06	4.95085e+06	1.05624e+07	3.26676e+06	6.30721e+06	6.3313e+06	6.33117e+06
LPS(18:0)+H	LPS(18:0)+H	LPS	(18:0)	(18:0)				C24 H49 O9 N1 P1	526.314	3.228	0.0485368	1.3742e+06	965253	751992	1.63185e+06	1.55927e+06	2.99077e+06	1.38494e+06	2.72464e+06	1.26515e+07	355249	2.06816e+06	2.06461e+06	1.89743e+06
LPE(22:4)+H	LPE(22:4)+H	LPE	(22:4)	(22:4)				C27 H49 O7 N1 P1	530.324	2.85938	0.0107262	1.52498e+06	1.50964e+06	1.34204e+06	1.6243e+06	1.77742e+06	2.80543e+06	2.30005e+06	1.97125e+06	1.55926e+06	1.41813e+06	2.07215e+06	2.10039e+06	2.11658e+06
Cer(d34:3)+H	Cer(d34:3)+H	Cer	(d34:3)	(d34:3)				C34 H64 O3 N1	534.488	9.67623	0.0076452	2.1692e+07	1.21248e+07	1.38085e+07	1.39534e+07	1.27208e+07	2.27593e+07	1.80898e+07	1.62096e+07	1.24121e+07	1.61137e+07	1.75842e+07	1.73539e+07	1.7353e+07
Cer(d18:2/16:0)+H	Cer(d34:2)+H	Cer	(d18:2/16:0)	(d18:2)	(16:0)			C34 H66 O3 N1	536.504	10.8308	0.010592	4.15056e+07	4.14289e+07	4.85016e+07	1.84661e+07	3.55346e+07	2.28135e+07	2.52113e+07	5.17398e+07	4.48947e+07	2.93227e+07	3.38753e+07	3.32571e+07	3.38742e+07
Cer(d18:1/16:0)+H	Cer(d34:1)+H	Cer	(d18:1/16:0)	(d18:1)	(16:0)			C34 H68 O3 N1	538.519	11.7711	0.0035875	8.73252e+07	8.96264e+07	9.64983e+07	7.37219e+07	7.28235e+07	1.17784e+08	1.67252e+08	1.2804e+08	1.46217e+08	1.15383e+08	1.0671e+08	107273972	1.06542e+08
Cer(d34:1)+H	Cer(d34:1)+H	Cer	(d34:1)	(d34:1)				C34 H68 O3 N1	538.519	9.82957	0.002469	1.18599e+07	6.92921e+06	8.0654e+06	7.01882e+06	6.91401e+06	9.22582e+06	9.74915e+06	6.39897e+06	7.546e+06	8.36985e+06	9.38393e+06	9.42408e+06	9.38387e+06
Cer(d18:0/16:0)+H	Cer(d34:0)+H	Cer	(d18:0/16:0)	(d18:0)	(16:0)			C34 H70 O3 N1	540.535	12.1365	0.0112186	5.95479e+06	5.6564e+06	7.15697e+06	5.00207e+06	5.68403e+06	1.59599e+07	1.56712e+07	8.64793e+06	1.16326e+07	7.61765e+06	9.25102e+06	9.07337e+06	9.07374e+06
Cer(d34:0)+H	Cer(d34:0)+H	Cer	(d34:0)	(d34:0)				C34 H70 O3 N1	540.535	11.0445	0.00086003	1.65178e+08	9.20621e+07	1.01527e+08	9.85571e+07	9.26065e+07	1.27746e+08	1.07853e+08	1.14342e+08	8.41283e+07	85045307	110464900	1.10379e+08	1.10568e+08
LPC(20:4)+H	LPC(20:4)+H	LPC	(20:4)	(20:4)				C28 H51 O7 N1 P1	544.34	2.13775	0.00172343	6.50793e+06	7.51005e+06	5.75961e+06	5.65293e+06	6.80634e+06	2.60983e+07	1.0824e+07	8.41767e+06	9.00962e+06	6.10708e+06	1.08143e+07	1.07821e+07	1.07821e+07
LPC(18:0)+Na	LPC(18:0)+Na	LPC	(18:0)	(18:0)				C26 H54 O7 N1 P1 Na1	546.353	4.06926	0.00581619	3.09657e+06	2.84947e+06	1.85784e+06	1.83583e+06	2.67814e+06	1.7326e+07	6.62617e+06	4.21776e+06	9.74475e+06	2.19794e+06	5.50572e+06	5.5058e+06	5.56141e+06
LPC(20:3)+H	LPC(20:3)+H	LPC	(20:3)	(20:3)				C28 H53 O7 N1 P1	546.355	2.42624	0.011004	1.35993e+06	334187	140843	282419	475952	4.52243e+06	1.79982e+06	1.04427e+06	1.36885e+06	1.389e+06	1.37415e+06	1.34824e+06	1.37438e+06
LPC(20:2)+H	LPC(20:2)+H	LPC	(20:2)	(20:2)				C28 H55 O7 N1 P1	548.371	3.18	0.0163897	534659	387991	356664	402486	489552	3.6615e+06	1.07235e+06	527779	1.32121e+06	694517	1.0523e+06	1.02292e+06	1.02306e+06
PC(19:1)+H	PC(19:1)+H	PC	(19:1)	(19:1)				C27 H53 O8 N1 P1	550.35	2.93247	0.0134088	2.01121e+06	3.00539e+06	3.13257e+06	1.70111e+06	2.95503e+06	2.62026e+06	2.76164e+06	3.26711e+06	2.1716e+06	1.7345e+06	2.84631e+06	2.78123e+06	2.78119e+06
LPC(20:1)+H	LPC(20:1)+H	LPC	(20:1)	(20:1)				C28 H57 O7 N1 P1	550.387	4.19852	0.0270033	369213	364861	219150	245698	377213	4.91085e+06	1.35329e+06	574993	1.75165e+06	903820	1.06778e+06	1.06836e+06	1.11881e+06
Cer(d34:0+pO)+H	Cer(d34:0+pO)+H	Cer	(d34:0+pO)	(d34:0+pO)				C34 H70 O4 N1	556.53	9.36543	0.0014835	1.41527e+07	1.0132e+07	1.07168e+07	9.30058e+06	9.85791e+06	1.28132e+07	5.28955e+06	9.99373e+06	3.44968e+06	3.82255e+06	8.8237e+06	8.84638e+06	8.82368e+06
PE(23:4)+H	PE(23:4)+H	PE	(23:4)	(23:4)				C28 H49 O8 N1 P1	558.319	3.01812	0.00198152	3.088e+06	2.91763e+06	3.14326e+06	2.22415e+06	2.78155e+06	2.82016e+06	3.12212e+06	2.55613e+06	2.33357e+06	2.02231e+06	3.12145e+06	3.13219e+06	3.12147e+06
Cer(d36:3)+H	Cer(d36:3)+H	Cer	(d36:3)	(d36:3)				C36 H68 O3 N1	562.519	11.074	0.0358636	2.76759e+06	939903	413619	2.97603e+06	1.12749e+06	1.07739e+06	1.21071e+06	2.24055e+06	1.65514e+06	2.86123e+06	2.09351e+06	1.96554e+06	2.09229e+06
Cer(d18:2/18:0)+H	Cer(d36:2)+H	Cer	(d18:2/18:0)	(d18:2)	(18:0)			C36 H70 O3 N1	564.535	11.887	0.00538216	1.74959e+07	1.4271e+07	1.63339e+07	8.39866e+06	1.3154e+07	5.12278e+06	9.42421e+06	1.36113e+07	1.19239e+07	8.45535e+06	1.03727e+07	1.04064e+07	1.02975e+07
LPI(20:4)-H	LPI(20:4)-H	LPI	(20:4)	(20:4)				C29 H48 O12 N0 P1	619.289	1.812	0.0128513	260335	296232	386718	134092	305807	802364	205284	316660	266655	31755.8	270768	270794	276853
Cer(d18:1/18:0)+H	Cer(d36:1)+H	Cer	(d18:1/18:0)	(d18:1)	(18:0)			C36 H72 O3 N1	566.551	12.8246	0.00617979	1.8607e+07	1.44414e+07	1.87291e+07	1.9289e+07	1.6077e+07	3.02364e+07	4.35047e+07	2.74512e+07	3.28708e+07	1.95251e+07	2.67019e+07	2.64172e+07	2.67021e+07
Cer(d18:0/18:0)+H	Cer(d36:0)+H	Cer	(d18:0/18:0)	(d18:0)	(18:0)			C36 H74 O3 N1	568.566	13.2149	0.00800843	1.03007e+06	849779	1.21331e+06	1.04388e+06	975004	3.29978e+06	2.83796e+06	1.85115e+06	2.27122e+06	1.65484e+06	1.78867e+06	1.76398e+06	1.78867e+06
Cer(d36:0)+H	Cer(d36:0)+H	Cer	(d36:0)	(d36:0)				C36 H74 O3 N1	568.566	12.2569	0.00320863	1.99506e+07	4.62848e+06	5.26967e+06	4.29716e+06	5.13096e+06	1.74114e+07	1.46748e+07	1.73346e+07	1.1166e+07	1.09775e+07	1.13204e+07	1.13341e+07	1.13892e+07
PC(21:4)+H	PC(21:4)+H	PC	(21:4)	(21:4)				C29 H51 O8 N1 P1	572.335	2.2264	0.00278418	1.172e+07	1.5445e+07	1.35539e+07	8.43316e+06	9.77463e+06	9.70275e+06	1.27858e+07	1.11724e+07	8.03354e+06	8.18512e+06	1.2376e+07	1.23662e+07	1.24302e+07
Cer(d36:3+O)+H	Cer(d36:3+O)+H	Cer	(d36:3+O)	(d36:3+O)				C36 H68 O4 N1	578.514	9.36141	0.00405914	7.83862e+06	5.21977e+06	5.81317e+06	5.2616e+06	4.72997e+06	6.77342e+06	2.72927e+06	5.10432e+06	2.12132e+06	2.43403e+06	4.76018e+06	4.76007e+06	4.79367e+06
DG(18:1/14:0)+NH4	DG(32:1)+NH4	DG	(18:1/14:0)	(18:1)	(14:0)			C35 H70 O5 N1	584.525	12.562	0.013701	113961	238867	88982.6	1.8699e+06	239173	2.87748e+06	2.07084e+06	832316	6.92815e+06	1.35348e+06	1.80355e+06	1.80766e+06	1.76324e+06
Cer(d36:0+pO)+H	Cer(d36:0+pO)+H	Cer	(d36:0+pO)	(d36:0+pO)				C36 H74 O4 N1	584.561	10.7304	0.0198542	1.42041e+07	9.6238e+06	1.03653e+07	9.41132e+06	9.77945e+06	1.06567e+07	3.55273e+06	1.06862e+07	3.55539e+06	3.90594e+06	8.49535e+06	8.27447e+06	8.17242e+06
Cer(d18:2/20:0)+H	Cer(d38:2)+H	Cer	(d18:2/20:0)	(d18:2)	(20:0)			C38 H74 O3 N1	592.566	12.943	0.00749197	1.82804e+07	1.60444e+07	2.0539e+07	8.86279e+06	1.50107e+07	6.09315e+06	8.21878e+06	1.19571e+07	1.16081e+07	7.96544e+06	1.17467e+07	11647860	1.15726e+07
Cer(d18:1/20:0)+H	Cer(d38:1)+H	Cer	(d18:1/20:0)	(d18:1)	(20:0)			C38 H76 O3 N1	594.582	13.9574	0.00210664	8.56453e+06	8.26196e+06	9.38854e+06	7.15293e+06	7.79343e+06	1.42213e+07	1.73924e+07	1.0668e+07	1.37871e+07	9.48025e+06	1.10293e+07	1.10293e+07	1.10696e+07
Cer(d38:0)+H	Cer(d38:0)+H	Cer	(d38:0)	(d38:0)				C38 H78 O3 N1	596.598	13.5222	0.0172601	7.69296e+06	1.58831e+06	1.89368e+06	1.73701e+06	1.72735e+06	6.3283e+06	4.94887e+06	6.51593e+06	4.62237e+06	3.85451e+06	4.15724e+06	4.28176e+06	4.15529e+06
Cer(d18:2/19:0)+HCOO	Cer(d37:2)+HCOO	Cer	(d18:2/19:0)	(d18:2)	(19:0)			C38 H72 O5 N1	622.542	12.3896	0.0108219	2.79982e+06	2.62098e+06	2.1748e+06	1.22437e+06	2.0771e+06	764070	1.09897e+06	1.7069e+06	1.88543e+06	866220	1.72247e+06	1.69706e+06	1.73327e+06
DG(16:0/18:2)+NH4	DG(34:2)+NH4	DG	(16:0/18:2)	(16:0)	(18:2)			C37 H72 O5 N1	610.541	12.7608	0.00845416	1.1222e+07	6.34355e+06	6.37467e+06	5.42225e+07	2.10152e+07	4.49421e+07	3.42229e+07	1.7523e+07	1.15727e+08	1.79959e+07	3.69733e+07	3.69746e+07	3.64352e+07
DG(16:0/18:1)+NH4	DG(34:1)+NH4	DG	(16:0/18:1)	(16:0)	(18:1)			C37 H74 O5 N1	612.556	13.6556	0.0056862	7.96024e+06	6.32247e+06	6.60775e+06	2.27663e+07	1.09071e+07	6.00944e+07	3.81259e+07	2.25593e+07	1.50983e+08	1.90682e+07	3.36488e+07	3.33184e+07	3.36487e+07
DG(18:0/16:0)+NH4	DG(34:0)+NH4	DG	(18:0/16:0)	(18:0)	(16:0)			C37 H76 O5 N1	614.572	14.7929	0.00842186	1.9103e+06	1.62569e+06	1.26676e+06	4.41304e+06	2.09893e+06	6.22737e+06	3.99075e+06	3.89223e+06	1.14496e+07	2.61412e+06	6.44776e+06	6.54423e+06	6.54118e+06
Cer(d18:2/22:0)+H	Cer(d40:2)+H	Cer	(d18:2/22:0)	(d18:2)	(22:0)			C40 H78 O3 N1	620.598	13.899	0.00925399	1.88257e+07	1.86472e+07	1.78914e+07	1.05976e+07	1.41792e+07	1.31296e+07	1.14802e+07	1.60224e+07	1.32147e+07	1.10498e+07	1.36843e+07	1.39057e+07	1.3686e+07
Cer(d18:1/22:0)+H	Cer(d40:1)+H	Cer	(d18:1/22:0)	(d18:1)	(22:0)			C40 H80 O3 N1	622.613	15.1767	0.00262111	1.73968e+07	1.6191e+07	1.61824e+07	1.66489e+07	1.5291e+07	3.1623e+07	3.85009e+07	2.85491e+07	2.87495e+07	2.02248e+07	2.33178e+07	2.33174e+07	2.34236e+07
Cer(d18:0/22:0)+H	Cer(d40:0)+H	Cer	(d18:0/22:0)	(d18:0)	(22:0)			C40 H82 O3 N1	624.629	15.63	0.00843036	896461	763975	775435	850711	762251	2.84303e+06	1.99826e+06	1.62044e+06	1.56533e+06	1.21254e+06	1.27487e+06	1.2936e+06	1.29373e+06
DG(16:0/20:4)+NH4	DG(36:4)+NH4	DG	(16:0/20:4)	(16:0)	(20:4)			C39 H72 O5 N1	634.541	12.5228	0.00621786	8.15291e+06	1.04984e+07	9.33197e+06	7.97916e+06	7.67491e+06	1.2355e+07	1.126e+07	9.06738e+06	1.20886e+07	5.20574e+06	9.39339e+06	9.50798e+06	9.47363e+06
DG(18:2/18:2)+NH4	DG(36:4)+NH4	DG	(18:2/18:2)	(18:2)	(18:2)			C39 H72 O5 N1	634.541	11.9926	0.0090113	6.59475e+06	2.56053e+06	2.84793e+06	4.82765e+07	1.2779e+07	1.08369e+07	8.07904e+06	3.54421e+06	2.35795e+07	4.34917e+06	1.56652e+07	1.54661e+07	1.53958e+07
Cer(d18:2/23:0)+H	Cer(d41:2)+H	Cer	(d18:2/23:0)	(d18:2)	(23:0)			C41 H80 O3 N1	634.613	14.4696	0.0195387	1.57522e+06	2.05072e+06	1.22929e+06	940730	1.21214e+06	1.61709e+06	1.80208e+06	2.26112e+06	2.21468e+06	1.26487e+06	1.65234e+06	1.65267e+06	1.5972e+06
Cer(d18:0+pO/18:0)+HCOO	Cer(d36:0+pO)+HCOO	Cer	(d18:0+pO/18:0)	(d18:0+pO)	(18:0)			C37 H74 O6 N1	628.552	12.3408	0.0290062	1.57977e+06	1.84742e+06	1.77048e+06	2.07522e+06	1.85268e+06	2.58411e+06	1.97264e+06	1.54059e+06	1.91598e+06	1.55985e+06	1.76499e+06	1.85774e+06	1.85571e+06
Cer(d18:2/23:0)+H	Cer(d41:2)+H	Cer	(d18:2/23:0)	(d18:2)	(23:0)			C41 H80 O3 N1	634.613	14.72	0.0127586	2.00203e+06	2.63609e+06	1.84631e+06	1.03673e+06	1.68087e+06	901437	1.3072e+06	2.05449e+06	1.56244e+06	944537	1.5477e+06	1.58292e+06	1.58188e+06
DG(18:1/18:2)+NH4	DG(36:3)+NH4	DG	(18:1/18:2)	(18:1)	(18:2)			C39 H74 O5 N1	636.556	12.8226	0.00778765	9.80221e+06	4.81795e+06	6.24133e+06	5.7619e+07	1.7495e+07	3.77064e+07	2.33769e+07	1.25775e+07	6.87466e+07	1.06821e+07	3.00323e+07	3.00333e+07	2.96295e+07
Cer(d18:1/23:0)+H	Cer(d41:1)+H	Cer	(d18:1/23:0)	(d18:1)	(23:0)			C41 H82 O3 N1	636.629	15.8138	0.00388713	2.60204e+06	3.09149e+06	2.61586e+06	3.48702e+06	3.06017e+06	4.89292e+06	7.00531e+06	4.14798e+06	5.31342e+06	3.39586e+06	4.1946e+06	4.16644e+06	4.16653e+06
DG(18:1/18:1)+NH4	DG(36:2)+NH4	DG	(18:1/18:1)	(18:1)	(18:1)			C39 H76 O5 N1	638.572	13.712	0.00687986	5.27986e+06	4.20551e+06	5.79312e+06	1.57992e+07	7.22268e+06	3.23641e+07	1.73424e+07	2.13051e+07	5.69396e+07	7.79974e+06	1.59491e+07	1.58539e+07	1.57317e+07
DG(18:0/18:1)+NH4	DG(36:1)+NH4	DG	(18:0/18:1)	(18:0)	(18:1)			C39 H78 O5 N1	640.587	14.8378	0.00495641	5.31888e+06	6.14498e+06	7.07521e+06	9.4407e+06	6.45826e+06	1.22934e+07	6.58392e+06	7.50962e+06	1.67429e+07	3.50995e+06	7.88889e+06	7.9567e+06	7.88868e+06
Cer(d18:2/24:2)+H	Cer(d42:4)+H	Cer	(d18:2/24:2)	(d18:2)	(24:2)			C42 H78 O3 N1	644.598	13.0282	0.0109762	4.99806e+06	6.62843e+06	6.31309e+06	2.57573e+06	3.2196e+06	2.93311e+06	4.04732e+06	3.73141e+06	4.10268e+06	3.11291e+06	4.00564e+06	4.00145e+06	3.928e+06
Cer(d18:2/24:1)+H	Cer(d42:3)+H	Cer	(d18:2/24:1)	(d18:2)	(24:1)			C42 H80 O3 N1	646.613	14.0017	0.00217594	6.40812e+07	7.91299e+07	7.0593e+07	3.07441e+07	4.87447e+07	3.28437e+07	3.85828e+07	6.61659e+07	5.04752e+07	4.20938e+07	4.98708e+07	5.00588e+07	4.98705e+07
Cer(d18:2/24:0)+H	Cer(d42:2)+H	Cer	(d18:2/24:0)	(d18:2)	(24:0)			C42 H82 O3 N1	648.629	15.3356	0.000602344	3.88389e+07	4.16657e+07	3.67968e+07	2.06306e+07	2.7467e+07	1.88858e+07	2.21195e+07	3.11664e+07	2.15829e+07	2.37518e+07	2.71443e+07	2.71443e+07	2.7116e+07
Cer(d18:1/24:1)+H	Cer(d42:2)+H	Cer	(d18:1/24:1)	(d18:1)	(24:1)			C42 H82 O3 N1	648.629	15.074	0.000526698	5.48109e+07	6.11123e+07	5.4411e+07	3.93443e+07	4.39118e+07	83043475	9.33276e+07	8.44779e+07	9.14526e+07	6.60272e+07	6.78486e+07	6.77868e+07	6.77868e+07
Cer(d18:1/24:0)+H	Cer(d42:1)+H	Cer	(d18:1/24:0)	(d18:1)	(24:0)			C42 H84 O3 N1	650.645	16.4701	0.00239167	2.87325e+07	2.85381e+07	2.3985e+07	2.83462e+07	2.68971e+07	4.26315e+07	5.21406e+07	4.07514e+07	3.65713e+07	3.17255e+07	3.48513e+07	3.48518e+07	3.47074e+07
LPE(18:1)-H	LPE(18:1)-H	LPE	(18:1)	(18:1)				C23 H45 O7 N1 P1	478.294	2.95044	0.0334971	477559	445402	383085	576356	876783	3.17957e+06	954931	1.32766e+06	967278	577480	1.03952e+06	1.11084e+06	1.06759e+06
DG(18:1/20:4)+NH4	DG(38:5)+NH4	DG	(18:1/20:4)	(18:1)	(20:4)			C41 H74 O5 N1	660.556	12.5707	0.00282897	1.02516e+07	9.81991e+06	1.32829e+07	8.87624e+06	9.76845e+06	1.55702e+07	1.62908e+07	1.14412e+07	1.50298e+07	6.21531e+06	1.14923e+07	1.14923e+07	1.14361e+07
DG(16:0/22:4)+NH4	DG(38:4)+NH4	DG	(16:0/22:4)	(16:0)	(22:4)			C41 H76 O5 N1	662.572	13.2721	0.0173648	4.81797e+06	5.05303e+06	8.65966e+06	4.03172e+06	3.93001e+06	4.82716e+06	5.47826e+06	3.36453e+06	4.98017e+06	3.31267e+06	4.89234e+06	5.0366e+06	4.88418e+06
DG(18:0/20:4)+NH4	DG(38:4)+NH4	DG	(18:0/20:4)	(18:0)	(20:4)			C41 H76 O5 N1	662.572	13.6092	0.00240496	171709987	1.81616e+08	2.06097e+08	1.50844e+08	1.34368e+08	1.44855e+08	1.77986e+08	1.46621e+08	1.69914e+08	7.80906e+07	1.5538e+08	1.55381e+08	1.54734e+08
DG(20:2/18:2)+NH4	DG(38:4)+NH4	DG	(20:2/18:2)	(20:2)	(18:2)			C41 H76 O5 N1	662.572	12.9667	0.024171	1.73953e+06	1.52642e+06	1.57968e+06	4.88903e+06	1.94336e+06	5.41718e+06	3.91415e+06	2.32552e+06	3.21207e+06	2.00653e+06	1.98271e+06	1.9961e+06	2.07306e+06
DG(18:0/20:3)+NH4	DG(38:3)+NH4	DG	(18:0/20:3)	(18:0)	(20:3)			C41 H78 O5 N1	664.587	14.127	0.00887213	4.54096e+06	4.85293e+06	4.64346e+06	5.383e+06	4.80157e+06	8.46029e+06	8.00696e+06	5.58155e+06	4.90081e+06	4.15468e+06	5.34775e+06	5.43031e+06	5.34765e+06
DG(18:0/20:3)+NH4	DG(38:3)+NH4	DG	(18:0/20:3)	(18:0)	(20:3)			C41 H78 O5 N1	664.587	14.4973	0.0161897	3.95356e+06	4.20311e+06	3.8383e+06	2.08964e+06	3.6026e+06	2.07796e+06	1.76898e+06	4.15019e+06	2.10704e+06	2.01003e+06	2.63772e+06	2.6456e+06	2.56858e+06
ChE(18:2)+NH4	ChE(18:2)+NH4	ChE	(18:2)	(18:2)				C45 H80 O2 N1	666.618	21.7377	0.0568459	2.63531e+06	1.38726e+07	1.7872e+06		1.27899e+06	1.41651e+08	6.59452e+07	13210155	1.05289e+07	1.80234e+07	1.95821e+07	2.16436e+07	2.16476e+07
SM(d32:2)+H	SM(d32:2)+H	SM	(d32:2)	(d32:2)				C37 H74 O6 N2 P1	673.528	8.08964	0.00716785	2.20017e+06	2.34253e+06	2.22036e+06	1.24559e+06	2.42602e+06	2.36466e+06	1.30692e+06	2.17682e+06	2.36393e+06	1.12121e+06	1.80387e+06	1.78166e+06	1.78166e+06
SM(d32:1)+H	SM(d32:1)+H	SM	(d32:1)	(d32:1)				C37 H76 O6 N2 P1	675.544	9.25229	0.00445153	2.17517e+07	2.53358e+07	2.30425e+07	1.58293e+07	2.37407e+07	4.22415e+07	3.84017e+07	2.44698e+07	3.32795e+07	1.71118e+07	2.57383e+07	2.59376e+07	2.59379e+07
Cer(d18:1/20:0)+HCOO	Cer(d38:1)+HCOO	Cer	(d18:1/20:0)	(d18:1)	(20:0)			C39 H76 O5 N1	638.573	13.95	0.00437586	2.25109e+07	2.12503e+07	2.33296e+07	1.84119e+07	1.96376e+07	3.77075e+07	4.61041e+07	2.75792e+07	3.88943e+07	2.52698e+07	2.70153e+07	2.70867e+07	2.7247e+07
DG(18:0/22:6)+NH4	DG(40:6)+NH4	DG	(18:0/22:6)	(18:0)	(22:6)			C43 H76 O5 N1	686.572	13.229	0.0160305	1.20715e+06	1.6468e+06	1.19271e+06	1.30763e+06	599950	2.81552e+06	1.83895e+06	1.55206e+06	1.86426e+06	936976	1.4339e+06	1.3945e+06	1.43399e+06
DG(18:0/22:5)+NH4	DG(40:5)+NH4	DG	(18:0/22:5)	(18:0)	(22:5)			C43 H78 O5 N1	688.587	13.6019	0.00781767	5.7547e+06	6.70937e+06	7.68976e+06	5.26932e+06	4.21541e+06	3.86878e+06	3.61103e+06	3.12162e+06	3.89969e+06	1.90588e+06	4.49006e+06	4.49123e+06	4.43012e+06
SM(d33:1)+H	SM(d33:1)+H	SM	(d33:1)	(d33:1)				C38 H78 O6 N2 P1	689.559	9.87737	0.00215329	2.67593e+07	3.32677e+07	2.65329e+07	1.76507e+07	2.97186e+07	3.22963e+07	2.65085e+07	2.53423e+07	2.60517e+07	1.42926e+07	2.54139e+07	2.55089e+07	2.5509e+07
PC(30:1e)+H	PC(30:1e)+H	PC	(30:1e)	(30:1e)				C38 H77 O7 N1 P1	690.543	10.9513	0.00366959	1.64782e+07	2.01883e+07	1.32054e+07	8.55207e+06	2.16924e+07	1.99467e+07	1.89086e+07	1.50237e+07	1.46617e+07	9.48744e+06	1.48643e+07	1.49592e+07	1.48648e+07
DG(18:0/22:4)+NH4	DG(40:4)+NH4	DG	(18:0/22:4)	(18:0)	(22:4)			C43 H80 O5 N1	690.603	14.42	0.00300568	9.75045e+06	1.34838e+07	1.18732e+07	7.67159e+06	6.73939e+06	5.73596e+06	6.75088e+06	5.17011e+06	6.25536e+06	3.1181e+06	7.07834e+06	7.11523e+06	7.07829e+06
PC(30:0e)+H	PC(30:0e)+H	PC	(30:0e)	(30:0e)				C38 H79 O7 N1 P1	692.559	11.093	0.274719	2.04559e+07	2.11562e+07	1.47174e+07	1.29534e+07	2.52458e+07	7.06094e+07	3.15053e+07	1.98046e+07	2.82836e+07	2.76927e+07	1.60852e+07	9.46466e+06	1.60355e+07
SM(d32:1)+Na	SM(d32:1)+Na	SM	(d32:1)	(d32:1)				C37 H75 O6 N2 P1 Na1	697.525	9.25229	0.00429507	2.72279e+06	3.57881e+06	3.13774e+06	2.03022e+06	3.25735e+06	5.3518e+06	5.46023e+06	3.2463e+06	4.62876e+06	2.22362e+06	3.25894e+06	3.28425e+06	3.26108e+06
PE(16:0p/18:2)+H	PE(34:2p)+H	PE	(16:0p/18:2)	(16:0p)	(18:2)			C39 H75 O7 N1 P1	700.528	11.5658	0.00688849	1.99359e+07	1.82607e+07	2.7192e+07	2.04962e+07	3.07701e+07	2.53888e+07	2.40467e+07	1.91551e+07	1.27352e+07	1.21534e+07	2.05273e+07	2.05292e+07	2.02843e+07
CerG1(d18:1/16:0)+H	CerG1(d34:1)+H	CerG1	(d18:1/16:0)	(d18:1)	(16:0)			C40 H78 O8 N1	700.572	10.855	0.00351523	1.79094e+06	1.71892e+06	2.67289e+06	975319	2.85061e+06	1.5467e+07	9.10112e+06	3.95511e+06	5.06537e+06	4.48191e+06	4.2449e+06	4.21677e+06	4.23926e+06
SM(d34:2)+H	SM(d34:2)+H	SM	(d34:2)	(d34:2)				C39 H78 O6 N2 P1	701.559	9.42862	0.00814049	2.0635e+08	2.33794e+08	2.97197e+08	1.2414e+08	2.90239e+08	1.80407e+08	9.76946e+07	2.25242e+08	1.54145e+08	99109558	1.72383e+08	1.74818e+08	1.7237e+08
Cer(d18:2/24:1)-H	Cer(d42:3)-H	Cer	(d18:2/24:1)	(d18:2)	(24:1)			C42 H78 O3 N1	644.599	13.9977	0.0375983	3.47671e+06	4.0442e+06	3.26216e+06	1.80767e+06	2.18065e+06	1.68682e+06	2.02445e+06	3.50288e+06	2.79411e+06	2.31745e+06	2.68031e+06	2.87038e+06	2.7045e+06
PE(16:0p/18:1)+H	PE(34:1p)+H	PE	(16:0p/18:1)	(16:0p)	(18:1)			C39 H77 O7 N1 P1	702.543	12.3486	0.00618887	1.11635e+08	113712097	1.62737e+08	8.23405e+07	1.78332e+08	1.29246e+08	1.4474e+08	1.53959e+08	8.10138e+07	5.36451e+07	1.11454e+08	1.1026e+08	1.11448e+08
SM(d34:1)+H	SM(d34:1)+H	SM	(d34:1)	(d34:1)				C39 H80 O6 N2 P1	703.575	10.4607	0.00106494	2977132798	3311744014	3567371510	2168786999	3596502807	5293665214	4461830379	3917426592	3798705811	2084038180	3531523725	3525010641	3531517594
PE(18:0p/16:0)+H	PE(34:0p)+H	PE	(18:0p/16:0)	(18:0p)	(16:0)			C39 H79 O7 N1 P1	704.559	13.3307	0.0842504	1.85233e+06	2.19667e+06	1.86796e+06	1.49717e+06	2.17444e+06	1.92399e+06	1.96442e+06	3.6207e+06	1.42494e+06	1.03752e+06	2.21903e+06	2.21196e+06	2.55526e+06
PC(31:0p)+H	PC(31:0p)+H	PC	(31:0p)	(31:0p)				C39 H79 O7 N1 P1	704.559	11.4511	0.00644416	2.25145e+07	2.72154e+07	1.41682e+07	8.75317e+06	2.64562e+07	1.11439e+07	1.65215e+07	2.10579e+07	1.46397e+07	6.82314e+06	1.65706e+07	16386006	1.657e+07
SM(d34:0)+H	SM(d34:0)+H	SM	(d34:0)	(d34:0)				C39 H82 O6 N2 P1	705.591	10.8685	0.00213852	1.40041e+08	1.70008e+08	184161508	1.08436e+08	1.48355e+08	6.88289e+08	4.64748e+08	2.70599e+08	4.15457e+08	144666693	2.67146e+08	2.66716e+08	2.66016e+08
TG(16:0/10:0/14:0)+NH4	TG(40:0)+NH4	TG	(16:0/10:0/14:0)	(16:0)	(10:0)	(14:0)		C43 H86 O6 N1	712.645	17.553	0.0374653	357312	30834.4		9.35818e+06	342699	5.16923e+06	2.3572e+06	4.51639e+06	6.10268e+06	1.75669e+06	3.13786e+06	3.13687e+06	2.93809e+06
PC(32:2p)+H	PC(32:2p)+H	PC	(32:2p)	(32:2p)				C40 H77 O7 N1 P1	714.543	10.714	0.00288627	2.62404e+07	2.4176e+07	1.25975e+07	6.3496e+06	1.48437e+07	8.31493e+06	1.19246e+07	2.07688e+07	1.12115e+07	5.75753e+06	1.29862e+07	1.29219e+07	1.29211e+07
SM(d35:2)+H	SM(d35:2)+H	SM	(d35:2)	(d35:2)				C40 H80 O6 N2 P1	715.575	10.0336	0.00374155	1.01469e+07	1.08685e+07	1.07754e+07	6.86952e+06	1.79836e+07	4.26359e+06	2.76523e+06	9.50031e+06	5.33088e+06	2.36088e+06	7.0404e+06	7.08628e+06	7.08616e+06
TG(6:0/16:0/18:1)+Na	TG(40:1)+Na	TG	(6:0/16:0/18:1)	(6:0)	(16:0)	(18:1)		C43 H80 O6 Na1	715.585	16.5101	0.0021895	136976			4.9839e+06	635308	1.50851e+07	6.92559e+06	8.68517e+06	2.0973e+07	5.73875e+06	6.16389e+06	6.16394e+06	6.18732e+06
PC(31:2)+H	PC(31:2)+H	PC	(31:2)	(31:2)				C39 H75 O8 N1 P1	716.522	11.0693	0.00662243	2.52031e+07	1.21738e+07	1.04247e+07	2.6057e+07	3.04057e+07	111032933	4.15386e+07	3.11625e+07	1.98631e+07	1.71265e+07	3.26256e+07	3.30017e+07	3.26264e+07
Cer(d18:1/24:1)-H	Cer(d42:2)-H	Cer	(d18:1/24:1)	(d18:1)	(24:1)			C42 H80 O3 N1	646.614	15.0748	0.0224482	1.97479e+06	2.16829e+06	1.8245e+06	1.62822e+06	1.41761e+06	3.52601e+06	3.35545e+06	3.72597e+06	3.61693e+06	2.88416e+06	2.59245e+06	2.69595e+06	2.69592e+06
PC(32:1p)+H	PC(32:1p)+H	PC	(32:1p)	(32:1p)				C40 H79 O7 N1 P1	716.559	11.1407	0.010625	1.3452e+08	1.43514e+08	1.12727e+08	6.03653e+07	1.29398e+08	1.30466e+08	1.01936e+08	1.01665e+08	7.91994e+07	5.96446e+07	9.45591e+07	9.63179e+07	9.63238e+07
SM(d34:2+hO)+H	SM(d34:2+hO)+H	SM	(d34:2+hO)	(d34:2+hO)				C39 H78 O7 N2 P1	717.554	9.04107	0.127394	1.28226e+06	1.50162e+06	561278	530938	1.54419e+06	321846	361982	1.44429e+06	961705	269538	2.10839e+06	1.70151e+06	1.70415e+06
SM(d35:1)+H	SM(d35:1)+H	SM	(d35:1)	(d35:1)				C40 H82 O6 N2 P1	717.591	11.0107	0.00827005	9.34775e+07	1.04767e+08	8.72003e+07	7.20895e+07	1.23822e+08	1.07343e+08	8.12959e+07	9.60215e+07	8.55091e+07	3.28004e+07	8.31705e+07	8.43723e+07	8.43745e+07
CerG1(d34:1)+NH4	CerG1(d34:1)+NH4	CerG1	(d34:1)	(d34:1)				C40 H81 O8 N2	717.599	17.584	0.0193903	873139	111919	21323.6	7.87552e+06	872332	6.64027e+06	2.68606e+06	8.02254e+06	8.67544e+06	2.52148e+06	5.02188e+06	4.85621e+06	4.85762e+06
PE(34:1)+H	PE(34:1)+H	PE	(34:1)	(34:1)				C39 H77 O8 N1 P1	718.538	11.8332	0.00274415	4.13233e+07	3.49071e+07	3.49117e+07	3.30929e+07	5.64571e+07	1.21967e+08	6.79252e+07	6.3456e+07	4.10988e+07	3.31589e+07	5.00903e+07	5.00885e+07	4.98517e+07
PC(32:1e)+H	PC(32:1e)+H	PC	(32:1e)	(32:1e)				C40 H81 O7 N1 P1	718.575	11.219	0.021421	7.15137e+07	6.94204e+07	5.23828e+07	2.19756e+07	7.28514e+07	1.00181e+08	7.15815e+07	5.45066e+07	5.6757e+07	9.28641e+07	5.1144e+07	4.929e+07	4.92945e+07
PC(32:1e)+H	PC(32:1e)+H	PC	(32:1e)	(32:1e)				C40 H81 O7 N1 P1	718.575	11.9434	0.00444421	3.0357e+08	3.49604e+08	2.92039e+08	1.48826e+08	3.39876e+08	2.9933e+08	347888103	2.73652e+08	1.88339e+08	1.54615e+08	2.56164e+08	2.54196e+08	2.56162e+08
SM(d34:1+pO)+H	SM(d34:1+pO)+H	SM	(d34:1+pO)	(d34:1+pO)				C39 H80 O7 N2 P1	719.57	10.0936	0.0065041	8.4758e+07	8.50912e+07	4.06026e+07	6.28613e+07	8.2894e+07	5.07265e+07	5.67629e+07	9.184e+07	8.07083e+07	2.65824e+07	6.29853e+07	6.29847e+07	6.36972e+07
PC(31:0)+H	PC(31:0)+H	PC	(31:0)	(31:0)				C39 H79 O8 N1 P1	720.554	10.9791	0.00307667	5.25027e+07	5.13357e+07	2.78942e+07	2.71747e+07	5.23126e+07	6.7795e+07	5.15945e+07	4.84276e+07	4.74668e+07	2.98144e+07	4.63174e+07	4.6319e+07	4.60718e+07
PE(34:0)+H	PE(34:0)+H	PE	(34:0)	(34:0)				C39 H79 O8 N1 P1	720.554	12.753	0.00593406	2.30374e+06	2.28573e+06	2.17779e+06	1.12962e+07	2.94036e+06	5.49872e+06	3.02036e+06	2.02718e+06	1.26315e+07	1.90426e+06	2.48012e+06	2.48013e+06	2.45472e+06
Cer(d18:2/22:1)+HCOO	Cer(d40:3)+HCOO	Cer	(d18:2/22:1)	(d18:2)	(22:1)			C41 H76 O5 N1	662.573	12.9325	0.0121352	5.75297e+06	7.94163e+06	6.18827e+06	3.1381e+06	4.98052e+06	7.60993e+06	6.53516e+06	6.52389e+06	8.73183e+06	4.81977e+06	5.81931e+06	5.69616e+06	5.81579e+06
PC(32:0e)+H	PC(32:0e)+H	PC	(32:0e)	(32:0e)				C40 H83 O7 N1 P1	720.59	12.0801	0.00102859	8.01893e+07	6.98961e+07	6.21487e+07	5.18822e+07	9.68536e+07	2.83957e+08	1.56564e+08	1.25363e+08	9.74568e+07	1.0178e+08	1.18952e+08	1.1874e+08	1.18951e+08
SM(d34:0+pO)+H	SM(d34:0+pO)+H	SM	(d34:0+pO)	(d34:0+pO)				C39 H82 O7 N2 P1	721.585	10.5007	0.0184071	1.23631e+07	1.47256e+07	7.38894e+06	1.03152e+07	9.18671e+06	1.32286e+07	1.64508e+07	1.45067e+07	2.04526e+07	4.42798e+06	1.18114e+07	1.21957e+07	1.21966e+07
PE(16:0p/20:5)+H	PE(36:5p)+H	PE	(16:0p/20:5)	(16:0p)	(20:5)			C41 H73 O7 N1 P1	722.512	10.6873	0.00943936	2.34475e+07	2.26675e+07	1.94939e+07	1.58069e+07	2.57462e+07	2.76581e+07	3.02066e+07	2.6893e+07	1.87396e+07	2.55028e+07	2.31683e+07	2.31705e+07	2.35503e+07
PE(16:1p/20:4)+H	PE(36:5p)+H	PE	(16:1p/20:4)	(16:1p)	(20:4)			C41 H73 O7 N1 P1	722.512	10.4217	0.00470229	5.29228e+06	1.29655e+07	1.23858e+07	4.76113e+06	8.57683e+06	7.45838e+06	8.03269e+06	5.82813e+06	6.68654e+06	3.42876e+06	8.1251e+06	8.19154e+06	8.19174e+06
SM(d36:5)+H	SM(d36:5)+H	SM	(d36:5)	(d36:5)				C41 H76 O6 N2 P1	723.544	9.43051	0.00594366	4.50533e+07	5.39579e+07	7.27718e+07	2.18365e+07	7.2769e+07	3.9785e+07	1.77341e+07	5.05503e+07	2.96571e+07	1.69213e+07	3.52848e+07	3.52873e+07	3.4924e+07
PE(16:0p/20:4)+H	PE(36:4p)+H	PE	(16:0p/20:4)	(16:0p)	(20:4)			C41 H75 O7 N1 P1	724.528	11.3635	0.00607429	6.79948e+08	6.64253e+08	6.87366e+08	3.87762e+08	7.21353e+08	6.54882e+08	7.1141e+08	5.75611e+08	4.03372e+08	3.14098e+08	5.3982e+08	5.45517e+08	5.45561e+08
PE(18:1p/18:2)+H	PE(36:3p)+H	PE	(18:1p/18:2)	(18:1p)	(18:2)			C41 H77 O7 N1 P1	726.543	11.6287	0.0533236	1.2671e+07	1.09489e+07	1.18351e+07	1.1812e+07	1.79537e+07	2.74644e+07	2.63398e+07	1.68035e+07	1.37073e+07	1.39065e+07	1.66037e+07	1.81899e+07	1.6611e+07
PE(16:0p/20:3)+H	PE(36:3p)+H	PE	(16:0p/20:3)	(16:0p)	(20:3)			C41 H77 O7 N1 P1	726.543	12.0915	0.00491813	1.12057e+07	7.50504e+06	8.66896e+06	4.235e+06	1.45263e+07	5.8816e+06	4.73992e+06	1.33291e+07	4.77906e+06	4.57846e+06	7.51067e+06	7.57512e+06	7.57491e+06
SM(d34:0)+Na	SM(d34:0)+Na	SM	(d34:0)	(d34:0)				C39 H81 O6 N2 P1 Na1	727.572	10.8685	0.00414264	5.02174e+07	6.14921e+07	6.47695e+07	3.89296e+07	5.38634e+07	1.66777e+08	1.3212e+08	8.90846e+07	1.2845e+08	4.63195e+07	8.52346e+07	8.49329e+07	8.45334e+07
PE(18:0p/18:2)+H	PE(36:2p)+H	PE	(18:0p/18:2)	(18:0p)	(18:2)			C41 H79 O7 N1 P1	728.559	12.4053	0.0688659	4.57955e+07	5.74039e+07	7.49768e+07	3.73369e+07	8.00245e+07	6.79678e+07	8.59745e+07	9.53453e+07	4.83553e+07	3.28128e+07	7.14871e+07	6.32696e+07	7.14494e+07
Cer(d18:2/22:0)+HCOO	Cer(d40:2)+HCOO	Cer	(d18:2/22:0)	(d18:2)	(22:0)			C41 H78 O5 N1	664.589	13.9279	0.00738636	4.23084e+07	4.3361e+07	3.7317e+07	2.31483e+07	3.15887e+07	2.21979e+07	4.02592e+07	3.99286e+07	4.78369e+07	2.4156e+07	2.94585e+07	2.97632e+07	2.98843e+07
SM(d36:2)+H	SM(d36:2)+H	SM	(d36:2)	(d36:2)				C41 H82 O6 N2 P1	729.591	10.648	0.00217907	3.78387e+08	319319520	3.71532e+08	2.25618e+08	3.80083e+08	2.36487e+08	2.05427e+08	304694350	2.1606e+08	142462763	2.67108e+08	266101900	2.67109e+08
PC(32:2)+H	PC(32:2)+H	PC	(32:2)	(32:2)				C40 H77 O8 N1 P1	730.538	9.68264	0.0118113	7.71015e+06	6.90392e+06	6.63706e+06	6.1911e+06	1.1223e+07	1.5771e+07	1.15951e+07	5.83647e+06	1.02684e+07	8.95751e+06	9.56165e+06	9.36789e+06	9.56271e+06
PC(32:2)+H	PC(32:2)+H	PC	(32:2)	(32:2)				C40 H77 O8 N1 P1	730.538	10.245	0.00631475	1.18597e+07	9.77025e+06	5.41948e+06	3.39559e+06	6.59111e+06	7.22457e+06	6.56408e+06	1.00666e+07	7.56228e+06	4.32692e+06	7.07605e+06	6.99911e+06	7.0764e+06
PE(18:0p/18:1)+H	PE(36:1p)+H	PE	(18:0p/18:1)	(18:0p)	(18:1)			C41 H81 O7 N1 P1	730.575	13.3873	0.00422409	3.03523e+07	2.72188e+07	3.48407e+07	3.12189e+07	4.47762e+07	3.42972e+07	3.78562e+07	52278171	2.36534e+07	1.70396e+07	3.27219e+07	3.27794e+07	3.25169e+07
PC(33:1p)+H	PC(33:1p)+H	PC	(33:1p)	(33:1p)				C41 H81 O7 N1 P1	730.575	11.528	0.0159219	5.58626e+06	1.89489e+07	1.00947e+07	5.76944e+06	1.34003e+07	3.51913e+06	6.36125e+06	1.04342e+07	7.23847e+06	2.98264e+06	6.37405e+06	6.38091e+06	6.55489e+06
SM(d36:1)+H	SM(d36:1)+H	SM	(d36:1)	(d36:1)				C41 H84 O6 N2 P1	731.606	11.5216	0.00193662	5.9977e+08	4.95694e+08	5.61704e+08	4.54638e+08	5.91042e+08	7.54867e+08	796647257	5.90002e+08	4.85933e+08	322556386	571252982	5.7317e+08	5.71251e+08
PC(32:1)+H	PC(32:1)+H	PC	(32:1)	(32:1)				C40 H79 O8 N1 P1	732.554	10.9448	0.0074307	8.32037e+07	8.15838e+07	5.63264e+07	3.64677e+07	6.96238e+07	1.09709e+08	6.33598e+07	6.88607e+07	6.03763e+07	4.27948e+07	6.00842e+07	6.01151e+07	5.93299e+07
PC(32:1)+H	PC(32:1)+H	PC	(32:1)	(32:1)				C40 H79 O8 N1 P1	732.554	10.6695	0.00321662	9.15096e+08	8.34805e+08	6.1281e+08	3.92772e+08	7.98507e+08	1269439787	8.91211e+08	8.77713e+08	8.15609e+08	6.60808e+08	7.98247e+08	7.98238e+08	8.02698e+08
PE(35:1)+H	PE(35:1)+H	PE	(35:1)	(35:1)				C40 H79 O8 N1 P1	732.554	12.307	0.0366681	3.00576e+06	3.18238e+06	3.18202e+06	2.12816e+06	5.20094e+06	4.22825e+06	2.99306e+06	2.96691e+06	2.86642e+06	1.66312e+06	3.98336e+06	3.73921e+06	3.74213e+06
SM(d36:0)+H	SM(d36:0)+H	SM	(d36:0)	(d36:0)				C41 H86 O6 N2 P1	733.622	11.8908	0.00281419	2.87208e+07	2.94851e+07	3.41614e+07	2.66639e+07	2.74483e+07	8.64348e+07	6.90207e+07	4.29087e+07	5.1877e+07	2.08684e+07	4.05666e+07	4.07657e+07	4.07643e+07
PC(32:0)+H	PC(32:0)+H	PC	(32:0)	(32:0)				C40 H81 O8 N1 P1	734.569	11.4626	0.00319879	1668919195	1513799132	1422090833	1000876698	1779856472	2548205992	2078939859	1615493250	1317681627	1439872603	1727879542	1727849081	1737455176
TG(10:0/14:0/18:2)+NH4	TG(42:2)+NH4	TG	(10:0/14:0/18:2)	(10:0)	(14:0)	(18:2)		C45 H86 O6 N1	736.645	16.5437	0.0169079	486326	64127	14323.5	2.15531e+07	1.51555e+06	1.26898e+07	4.40942e+06	4.70708e+06	1.1956e+07	4.78042e+06	7.64669e+06	7.87149e+06	7.6441e+06
SM(d35:2)+Na	SM(d35:2)+Na	SM	(d35:2)	(d35:2)				C40 H79 O6 N2 P1 Na1	737.557	10.0336	0.00627655	1.99147e+06	1.85752e+06	1.85402e+06	1.18971e+06	3.917e+06	876687	409181	1.82292e+06	962875	396596	1.35325e+06	1.33864e+06	1.33864e+06
PE(34:2)+Na	PE(34:2)+Na	PE	(34:2)	(34:2)				C39 H74 O8 N1 P1 Na1	738.504	11.0718	0.0216973	4.4062e+06	1.81092e+06	1.68194e+07	3.96056e+06	4.14554e+06	1.09068e+07	6.27094e+06	4.05918e+06	2.99667e+06	8.42227e+06	4.32879e+06	4.49576e+06	4.33317e+06
PE(35:1p)+Na	PE(35:1p)+Na	PE	(35:1p)	(35:1p)				C40 H78 O7 N1 P1 Na1	738.541	11.85	0.00436905	6.19706e+07	5.70637e+07	4.87648e+07	4.20162e+07	6.41085e+07	4.28104e+07	3.71563e+07	4.92884e+07	3.64388e+07	1.06585e+07	5.25763e+07	5.21798e+07	5.21811e+07
PC(32:1p)+Na	PC(32:1p)+Na	PC	(32:1p)	(32:1p)				C40 H78 O7 N1 P1 Na1	738.541	11.1407	0.0151763	2.81479e+07	2.83755e+07	2.35907e+07	11359310	2.85675e+07	2.8599e+07	2.19474e+07	2.29514e+07	1.92355e+07	1.28607e+07	2.01796e+07	2.07136e+07	2.01775e+07
PC(34:4p)+H	PC(34:4p)+H	PC	(34:4p)	(34:4p)				C42 H77 O7 N1 P1	738.543	9.97231	0.000240804	6.22209e+06	6.56286e+06	5.94283e+06	3.60588e+06	5.78657e+06	5.30046e+06	4.98381e+06	3.57274e+06	3.3306e+06	1.97725e+06	4.55371e+06	4.55181e+06	4.55371e+06
TG(10:0/14:0/18:1)+NH4	TG(42:1)+NH4	TG	(10:0/14:0/18:1)	(10:0)	(14:0)	(18:1)		C45 H88 O6 N1	738.661	17.6787	0.00501472	1.28468e+06	224028	80104	2.52327e+07	1.70871e+06	2.96263e+07	1.42344e+07	1.34157e+07	2.67645e+07	9.46863e+06	1.39488e+07	1.39462e+07	1.38267e+07
SM(d34:2+hO)+Na	SM(d34:2+hO)+Na	SM	(d34:2+hO)	(d34:2+hO)				C39 H77 O7 N2 P1 Na1	739.536	9.04107	0.00669666	2.26094e+06	2.32306e+06	793672	895170	2.87122e+06	328107	375614	1.85594e+06	1.21198e+06	301157	1.16174e+06	1.16179e+06	1.14834e+06
SM(d35:1)+Na	SM(d35:1)+Na	SM	(d35:1)	(d35:1)				C40 H81 O6 N2 P1 Na1	739.572	11.0107	0.00715646	2.40716e+07	2.62736e+07	2.41834e+07	2.13455e+07	3.55452e+07	2.60311e+07	1.97196e+07	2.51319e+07	2.48051e+07	8.76942e+06	2.33002e+07	2.35903e+07	2.33004e+07
PE(32:1p)-H	PE(32:1p)-H	PE	(32:1p)	(32:1p)				C37 H71 O7 N1 P1	672.497	11.5101	0.0112039	2.76021e+06	2.33234e+06	2.31503e+06	1.36177e+06	4.92302e+06	1.36546e+06	2.24908e+06	2.08977e+06	1.18927e+06	947111	1.79093e+06	1.82582e+06	1.79075e+06
CerG1(d36:4)+NH4	CerG1(d36:4)+NH4	CerG1	(d36:4)	(d36:4)				C42 H79 O8 N2	739.583	15.496	0.02967	117685	43556.8	47775.1	6.54432e+06	606349	5.24286e+06	2.42998e+06	1.77517e+06	5.30761e+06	2.03346e+06	3.26125e+06	3.26159e+06	3.43195e+06
PE(16:0/20:4)+H	PE(36:4)+H	PE	(16:0/20:4)	(16:0)	(20:4)			C41 H75 O8 N1 P1	740.522	10.8769	0.00330266	1.95946e+07	2.02038e+07	1.55192e+07	1.36417e+07	2.31826e+07	6.31859e+07	4.15771e+07	3.34769e+07	2.93088e+07	2.12654e+07	2.82089e+07	2.82093e+07	2.8048e+07
LPC(32:1)+Na	LPC(32:1)+Na	LPC	(32:1)	(32:1)				C40 H80 O7 N1 P1 Na1	740.556	11.9406	0.00389945	7.17224e+07	8.26414e+07	7.05752e+07	4.34871e+07	7.98259e+07	5.70879e+07	74644118	6.41963e+07	4.77017e+07	3.72072e+07	5.9744e+07	5.97473e+07	6.01501e+07
PC(34:3p)+H	PC(34:3p)+H	PC	(34:3p)	(34:3p)				C42 H79 O7 N1 P1	740.559	10.691	0.00972953	1.23704e+07	1.41258e+07	1.05991e+07	5.19344e+06	7.48903e+06	6.80953e+06	8.95781e+06	5.836e+06	5.36458e+06	3.42079e+06	7.57917e+06	7.5798e+06	7.70793e+06
TG(16:0/10:0/16:0)+NH4	TG(42:0)+NH4	TG	(16:0/10:0/16:0)	(16:0)	(10:0)	(16:0)		C45 H90 O6 N1	740.676	18.905	0.00202131	2.37427e+06	158823	75205.5	5.60736e+07	2.13507e+06	4.00674e+07	1.80609e+07	3.53469e+07	5.35703e+07	1.33465e+07	2.31335e+07	2.32146e+07	2.32147e+07
SM(d34:1+pO)+Na	SM(d34:1+pO)+Na	SM	(d34:1+pO)	(d34:1+pO)				C39 H79 O7 N2 P1 Na1	741.552	10.0936	0.00449158	1.94501e+07	2.00812e+07	8.75325e+06	1.32396e+07	2.08292e+07	1.43117e+07	1.41728e+07	2.21145e+07	1.88426e+07	5.75929e+06	1.44842e+07	1.44847e+07	1.43721e+07
CerG1(d36:3)+NH4	CerG1(d36:3)+NH4	CerG1	(d36:3)	(d36:3)				C42 H81 O8 N2	741.599	16.5476	0.00328959	1.64597e+06	56194.3	68283.3	2.79837e+07	3.60035e+06	2.21561e+07	9.39164e+06	9.92203e+06	2.50769e+07	9.10012e+06	1.33697e+07	1.33695e+07	1.32936e+07
PE(36:3)+H	PE(36:3)+H	PE	(36:3)	(36:3)				C41 H77 O8 N1 P1	742.538	11.1365	0.0438281	1.94854e+07	1.11397e+07	1.26792e+07	2.0561e+07	2.87082e+07	1.09574e+08	3.01463e+07	3.14396e+07	1.89781e+07	1.6643e+07	3.04402e+07	3.04664e+07	3.2825e+07
PC(34:2p)+H	PC(34:2p)+H	PC	(34:2p)	(34:2p)				C42 H81 O7 N1 P1	742.575	12.0796	0.00327144	1.90767e+07	1.77654e+07	1.53866e+07	1.50253e+07	2.1528e+07	53627444	3.28073e+07	2.81976e+07	2.62349e+07	2.30102e+07	2.85293e+07	2.83684e+07	2.83681e+07
PC(34:2p)+H	PC(34:2p)+H	PC	(34:2p)	(34:2p)				C42 H81 O7 N1 P1	742.575	11.231	0.000793962	8.24524e+07	1.05966e+08	1.30214e+08	7.66387e+07	1.16739e+08	1.56697e+08	1.20683e+08	8.22439e+07	6.7489e+07	6.83416e+07	9.93504e+07	9.93511e+07	9.92142e+07
PE(32:0p)-H	PE(32:0p)-H	PE	(32:0p)	(32:0p)				C37 H73 O7 N1 P1	674.513	12.2997	0.0199298	3.80826e+06	4.73577e+06	3.41297e+06	2.21026e+06	4.05391e+06	2.14034e+06	3.20573e+06	3.00254e+06	1.49294e+06	1.66736e+06	2.62667e+06	2.53381e+06	2.61957e+06
CerG1(d36:2)+NH4	CerG1(d36:2)+NH4	CerG1	(d36:2)	(d36:2)				C42 H83 O8 N2	743.614	17.6591	0.00117632	1.54572e+06	41757.1	30844.9	2.29174e+07	3.76511e+06	41077286	2.0054e+07	2.49993e+07	4.46166e+07	1.57042e+07	2.02319e+07	2.01907e+07	2.0232e+07
PC(33:2)+H	PC(33:2)+H	PC	(33:2)	(33:2)				C41 H79 O8 N1 P1	744.554	10.2435	0.00977289	6.21874e+06	5.916e+06	5.02824e+06	5.14473e+06	6.92177e+06	9.00397e+06	6.91629e+06	4.20525e+06	5.71392e+06	4.58092e+06	5.93839e+06	5.83889e+06	5.8391e+06
PE(36:2)+H	PE(36:2)+H	PE	(36:2)	(36:2)				C41 H79 O8 N1 P1	744.554	11.8954	0.00733694	5.02601e+07	47243278	5.71983e+07	8.4783e+07	7.85001e+07	1.25298e+08	8.84195e+07	6.4162e+07	6.81598e+07	4.45122e+07	7.42018e+07	7.32673e+07	7.32663e+07
PC(34:2e)+H	PC(34:2e)+H	PC	(34:2e)	(34:2e)				C42 H83 O7 N1 P1	744.59	11.3817	0.011998	1.00136e+08	9.48913e+07	1.2149e+08	9.75881e+07	1.18164e+08	4.00078e+08	197553643	1.42374e+08	1.40248e+08	1.43798e+08	164169088	1.67607e+08	1.64175e+08
PC(34:2e)+H	PC(34:2e)+H	PC	(34:2e)	(34:2e)				C42 H83 O7 N1 P1	744.59	11.9993	0.00578117	2.39268e+08	3.15832e+08	3.37768e+08	1.72292e+08	3.68073e+08	2.68837e+08	2.54083e+08	2.73547e+08	1.84039e+08	110925312	2.37386e+08	2.35024e+08	2.374e+08
CerG1(d36:1)+NH4	CerG1(d36:1)+NH4	CerG1	(d36:1)	(d36:1)				C42 H85 O8 N2	745.63	18.8983	0.0137587	4.31396e+06	371759	202394	3.4071e+07	3.8407e+06	3.2695e+07	2.01772e+07	4.45218e+07	4.15596e+07	1.56079e+07	2.382e+07	2.38338e+07	2.32637e+07
PE(36:4p)+Na	PE(36:4p)+Na	PE	(16:0p/20:4)	(16:0p)	(20:4)			C41 H74 O7 N1 P1 Na1	746.51	11.3635	0.00444538	9.47985e+07	8.88174e+07	9.14653e+07	5.92157e+07	9.73293e+07	8.42243e+07	9.30436e+07	8.18208e+07	5.94775e+07	4.98974e+07	7.57752e+07	7.57758e+07	7.63605e+07
PE(36:1)+H	PE(36:1)+H	PE	(36:1)	(36:1)				C41 H81 O8 N1 P1	746.569	12.8154	0.00269932	1.63532e+08	1.69856e+08	2.41317e+08	1.46803e+08	2.42603e+08	2.31637e+08	1.57527e+08	1.73853e+08	157463147	7.23557e+07	1.71526e+08	1.70731e+08	1.70722e+08
Cer(d18:2/23:1)+HCOO	Cer(d41:3)+HCOO	Cer	(d18:2/23:1)	(d18:2)	(23:1)			C42 H78 O5 N1	676.589	13.4626	0.0140681	3.68851e+06	4.68496e+06	3.23835e+06	1.44082e+06	3.41585e+06	1.57405e+06	1.75576e+06	5.51645e+06	3.51821e+06	2.12596e+06	2.80055e+06	2.80024e+06	2.86919e+06
PC(33:0)+H	PC(33:0)+H	PC	(33:0)	(33:0)				C41 H83 O8 N1 P1	748.585	11.795	0.00400135	4.50867e+07	4.22267e+07	3.21822e+07	2.49292e+07	4.88299e+07	4.36753e+07	3.61465e+07	3.80904e+07	3.05081e+07	4.08535e+07	3.54874e+07	3.52425e+07	3.54884e+07
PC(34:0e)+H	PC(34:0e)+H	PC	(34:0e)	(34:0e)				C42 H87 O7 N1 P1	748.621	13.0955	0.00554455	2.47632e+07	1.46139e+07	1.81684e+07	2.03089e+07	2.5642e+07	4.11725e+07	3.40557e+07	2.88678e+07	2.2075e+07	2.08634e+07	2.61875e+07	2.5899e+07	26032820
PE(18:1p/20:4)+H	PE(38:5p)+H	PE	(18:1p/20:4)	(18:1p)	(20:4)			C43 H77 O7 N1 P1	750.543	11.4181	0.00138382	6.71137e+08	7.53462e+08	7.7607e+08	3.81984e+08	6.69608e+08	6.23446e+08	528325436	5.97887e+08	4.65501e+08	2.89275e+08	5.50234e+08	551555373	5.51554e+08
SM(d38:5)+H	SM(d38:5)+H	SM	(d38:5)	(d38:5)				C43 H80 O6 N2 P1	751.575	10.6531	0.00440891	7.03687e+07	5.82845e+07	7.12534e+07	5.1026e+07	7.42956e+07	4.5091e+07	3.64242e+07	6.14215e+07	4.42039e+07	3.0416e+07	5.42269e+07	5.4642e+07	5.46442e+07
PE(16:0p/22:4)+H	PE(38:4p)+H	PE	(16:0p/22:4)	(16:0p)	(22:4)			C43 H79 O7 N1 P1	752.559	12.0489	0.0113147	183677987	1.83131e+08	197119793	1.20962e+08	2.13122e+08	1.90243e+08	1.93142e+08	1.57296e+08	1.23343e+08	9.27443e+07	1.69125e+08	1.65852e+08	1.65854e+08
SM(d38:4)+H	SM(d38:4)+H	SM	(d38:4)	(d38:4)				C43 H82 O6 N2 P1	753.591	11.5207	0.00725216	7.65525e+07	6.35012e+07	6.9639e+07	7.97573e+07	7.52119e+07	6.87059e+07	9.49125e+07	7.08988e+07	6.50421e+07	5.14692e+07	7.2808e+07	7.19018e+07	7.28171e+07
PC(34:4)+H	PC(34:4)+H	PC	(34:4)	(34:4)				C42 H77 O8 N1 P1	754.538	9.48745	0.00549051	2.05921e+06	2.51103e+06	1.7618e+06	1.18973e+06	2.63923e+06	2.38263e+06	2.08187e+06	1.84979e+06	1.69378e+06	1.31609e+06	1.74895e+06	1.74873e+06	1.76553e+06
PC(32:1)+Na	PC(32:1)+Na	PC	(32:1)	(32:1)				C40 H78 O8 N1 P1 Na1	754.536	10.6695	0.0116778	2.21118e+08	197129900	1.48267e+08	1.01454e+08	1.83895e+08	3.80642e+08	2.18725e+08	2.31366e+08	2.43808e+08	1.88249e+08	2.00795e+08	200768005	2.0487e+08
PC(32:1)+Na	PC(32:1)+Na	PC	(32:1)	(32:1)				C40 H78 O8 N1 P1 Na1	754.536	10.9448	0.0217848	1.98334e+07	1.51576e+07	1.00107e+07	4.96535e+06	1.67705e+07	1.22652e+07	1.54275e+07	1.21443e+07	1.13055e+07	9.99462e+06	1.17555e+07	1.21062e+07	1.16042e+07
Cer(d18:2/23:0)+HCOO	Cer(d41:2)+HCOO	Cer	(d18:2/23:0)	(d18:2)	(23:0)			C42 H80 O5 N1	678.604	14.6465	0.0036006	8.22985e+06	1.04653e+07	6.66621e+06	5.01595e+06	6.61199e+06	4.16147e+06	5.68582e+06	8.15812e+06	6.75846e+06	4.15819e+06	5.74811e+06	5.71545e+06	5.75371e+06
LPE(18:0)-H	LPE(18:0)-H	LPE	(18:0)	(18:0)				C23 H47 O7 N1 P1	480.31	4.3354	0.0116753	6.13337e+06	4.4065e+06	3.07054e+06	3.40443e+06	4.58453e+06	1.68344e+07	5.46953e+06	6.40771e+06	1.59281e+07	2.69012e+06	6.33708e+06	6.1999e+06	6.22512e+06
PE(18:0p/20:3)+H	PE(38:3p)+H	PE	(18:0p/20:3)	(18:0p)	(20:3)			C43 H81 O7 N1 P1	754.575	12.7937	0.0119553	1.94442e+07	1.57133e+07	1.63258e+07	1.95261e+07	2.51606e+07	2.275e+07	1.81515e+07	2.08014e+07	1.33697e+07	1.05438e+07	1.86762e+07	1.82955e+07	1.82939e+07
PE(18:0p/20:3)+H	PE(38:3p)+H	PE	(18:0p/20:3)	(18:0p)	(20:3)			C43 H81 O7 N1 P1	754.575	13.1013	0.00380015	1.19032e+07	6.027e+06	9.56225e+06	6.42092e+06	1.56935e+07	6.71076e+06	3.41643e+06	1.18194e+07	4.01554e+06	4.42688e+06	7.18265e+06	7.18261e+06	7.13546e+06
SM(d36:0)+Na	SM(d36:0)+Na	SM	(d36:0)	(d36:0)				C41 H85 O6 N2 P1 Na1	755.604	11.8908	0.00278965	1.13083e+07	1.24266e+07	1.3852e+07	1.16691e+07	1.0166e+07	2.82394e+07	2.77432e+07	1.78391e+07	2.2148e+07	9.69513e+06	1.56845e+07	1.56847e+07	1.57605e+07
PC(34:3)+H	PC(34:3)+H	PC	(34:3)	(34:3)				C42 H79 O8 N1 P1	756.554	10.2107	0.0107461	1.6678e+07	1.58517e+07	1.37489e+07	1.07887e+07	1.28962e+07	2.21736e+07	5.57928e+06	1.40167e+07	3.89256e+06	1.04748e+07	1.46835e+07	1.46852e+07	1.44127e+07
PC(34:3)+H	PC(34:3)+H	PC	(34:3)	(34:3)				C42 H79 O8 N1 P1	756.554	9.92236	0.051364	2.51329e+07	2.05891e+07	2.46494e+07	1.41383e+07	4.99805e+07	1.78676e+07	4.5102e+07	1.89293e+07	2.96506e+07	1.90784e+07	2.98004e+07	2.72206e+07	2.97895e+07
PC(34:2)+H	PC(34:2)+H	PC	(34:2)	(34:2)				C42 H81 O8 N1 P1	758.569	10.7542	0.00589913	2230993287	2093939362	2330217069	2215691592	2800382219	5234099511	3769582157	2543356852	2707800371	2447301798	3045865751	3014966912	3014942860
SM(d38:1)+H	SM(d38:1)+H	SM	(d38:1)	(d38:1)				C43 H88 O6 N2 P1	759.637	12.5252	0.0045482	3.22867e+08	3.01708e+08	3.6063e+08	2.36211e+08	3.93835e+08	5.38088e+08	4.6381e+08	293187875	3.14247e+08	1.69214e+08	3.381e+08	3.39183e+08	3.36151e+08
PC(34:1)+H	PC(34:1)+H	PC	(34:1)	(34:1)				C42 H83 O8 N1 P1	760.585	11.5361	0.0019569	3947423540	3924296999	4400802844	2780872176	5007848623	7279702262	5406106986	5319674511	4471184036	3392539326	4548930707	4564349928	4548897691
TG(8:0/18:2/18:2)+NH4	TG(44:4)+NH4	TG	(8:0/18:2/18:2)	(8:0)	(18:2)	(18:2)		C47 H86 O6 N1	760.645	15.5413	0.0131029	301778	161199	181964	1.41942e+07	764107	2.47852e+06	1.35498e+06	730262	2.51202e+06	915894	3.0932e+06	3.1636e+06	3.09255e+06
Cer(d18:1/23:0)+HCOO	Cer(d41:1)+HCOO	Cer	(d18:1/23:0)	(d18:1)	(23:0)			C42 H82 O5 N1	680.62	15.8142	0.00994412	3.21651e+06	3.55305e+06	2.82925e+06	7.54949e+06	3.60832e+06	7.04001e+06	8.65628e+06	5.95021e+06	8.17231e+06	4.95932e+06	5.95518e+06	6.05883e+06	6.05905e+06
SM(d38:0)+H	SM(d38:0)+H	SM	(d38:0)	(d38:0)				C43 H90 O6 N2 P1	761.653	12.9099	0.00407337	9.36105e+06	8.62379e+06	1.12783e+07	8.51209e+06	9.32644e+06	2.3317e+07	1.88178e+07	1.16213e+07	1.57923e+07	6.24126e+06	1.21498e+07	1.20643e+07	1.21499e+07
PC(34:0)+H	PC(34:0)+H	PC	(34:0)	(34:0)				C42 H85 O8 N1 P1	762.601	12.4291	0.00328608	4.81952e+08	4.399e+08	4.57641e+08	3.34198e+08	5.18714e+08	541865078	4.61207e+08	4.1235e+08	2.91719e+08	278627832	4.14347e+08	4.16696e+08	4.14319e+08
TG(8:0/18:1/18:2)+NH4	TG(44:3)+NH4	TG	(8:0/18:1/18:2)	(8:0)	(18:1)	(18:2)		C47 H88 O6 N1	762.661	16.6204	0.0034731	1.23898e+06	66302.9	45536.4	4.3105e+07	2.6086e+06	2.01213e+07	9.69002e+06	6.38968e+06	1.88303e+07	7.44514e+06	1.33407e+07	1.33403e+07	1.32604e+07
PE(16:0/22:6)+H	PE(38:6)+H	PE	(16:0/22:6)	(16:0)	(22:6)			C43 H75 O8 N1 P1	764.522	10.6267	0.00733265	7.52931e+06	6.07958e+06	6.2265e+06	5.54189e+06	9.91016e+06	3.35729e+07	1.87999e+07	1.83602e+07	1.30503e+07	1.20305e+07	1.53895e+07	1.51946e+07	1.51969e+07
PC(36:5p)+H	PC(36:5p)+H	PC	(36:5p)	(36:5p)				C44 H79 O7 N1 P1	764.559	10.0783	0.00389919	2.45152e+07	3.2795e+07	2.52726e+07	1.13541e+07	2.48202e+07	1.54468e+07	1.97191e+07	1.57399e+07	1.08032e+07	8.95161e+06	1.65793e+07	1.65798e+07	1.66918e+07
PC(34:2p)+Na	PC(34:2p)+Na	PC	(34:2p)	(34:2p)				C42 H80 O7 N1 P1 Na1	764.556	11.231	0.00423589	1.52721e+07	1.94056e+07	2.50015e+07	1.44609e+07	2.31083e+07	2.57379e+07	2.17624e+07	1.49435e+07	1.18967e+07	1.24264e+07	1.78945e+07	1.79238e+07	1.77805e+07
TG(16:0/10:0/18:2)+NH4	TG(44:2)+NH4	TG	(16:0/10:0/18:2)	(16:0)	(10:0)	(18:2)		C47 H90 O6 N1	764.676	17.7883	0.00215625	4.50888e+06	300754	70385.9	1.46207e+08	7.74217e+06	94229574	3.98224e+07	3.54552e+07	8.66948e+07	3.05769e+07	5.01534e+07	5.01518e+07	4.99655e+07
PE(18:1/18:1)+Na	PE(36:2)+Na	PE	(18:1/18:1)	(18:1)	(18:1)			C41 H78 O8 N1 P1 Na1	766.536	10.9544	0.0139985	2.78599e+07	2.61648e+07	2.95687e+07	1.98347e+07	2.75075e+07	7.51502e+07	4.91405e+07	3.68455e+07	4.13679e+07	2.4138e+07	3.42358e+07	3.342e+07	3.3418e+07
PG(34:1)+NH4	PG(34:1)+NH4	PG	(34:1)	(34:1)				C40 H81 O10 N1 P1	766.559	10.6773	0.0126451	1.51716e+07	1.93706e+07	1.34429e+07	9.81083e+06	1.39251e+07	1.49182e+07	1.16495e+07	1.64724e+07	1.37661e+07	1.16362e+07	1.40663e+07	1.39173e+07	1.42721e+07
PC(36:4p)+H	PC(36:4p)+H	PC	(36:4p)	(36:4p)				C44 H81 O7 N1 P1	766.575	11.3746	0.00851565	1.41845e+08	1.57645e+08	1.44057e+08	8.9926e+07	1.21217e+08	1.82906e+08	1.64088e+08	1.2106e+08	1.01416e+08	8.51724e+07	1.23232e+08	1.2331e+08	1.21463e+08
Cer(d18:2/24:2)+HCOO	Cer(d42:4)+HCOO	Cer	(d18:2/24:2)	(d18:2)	(24:2)			C43 H78 O5 N1	688.589	13.026	0.00664261	1.82043e+07	2.4254e+07	1.97072e+07	8.40689e+06	1.24381e+07	9.75229e+06	1.28534e+07	1.52677e+07	1.48919e+07	9.84427e+06	1.24167e+07	1.24159e+07	1.25597e+07
PC(34:2e)+Na	PC(34:2e)+Na	PC	(34:2e)	(34:2e)				C42 H82 O7 N1 P1 Na1	766.572	11.9993	0.00948509	7.27877e+07	9.40403e+07	1.06101e+08	6.16748e+07	1.01137e+08	7.17136e+07	7.94089e+07	8.30087e+07	6.55867e+07	4.35226e+07	7.93651e+07	7.93614e+07	7.80665e+07
PC(36:4p)+H	PC(36:4p)+H	PC	(36:4p)	(36:4p)				C44 H81 O7 N1 P1	766.575	11.0362	0.00301876	1233595427	1472511347	1299556657	7.46762e+08	1114687577	1094745577	1230554817	9.8134e+08	6.29617e+08	4.92273e+08	9.94369e+08	9.94798e+08	9.9978e+08
TG(16:0/10:0/18:1)+NH4	TG(44:1)+NH4	TG	(16:0/10:0/18:1)	(16:0)	(10:0)	(18:1)		C47 H92 O6 N1	766.692	18.9246	0.0015695	5.93603e+06	392550	246763	1.52694e+08	7.58533e+06	1.98501e+08	7.48683e+07	8.94949e+07	1.89293e+08	5.59026e+07	7.93278e+07	7.95437e+07	7.9544e+07
CerG1(d38:4)+NH4	CerG1(d38:4)+NH4	CerG1	(d38:4)	(d38:4)				C44 H83 O8 N2	767.614	16.6154	0.00294933	3.38549e+06	167425	199345	4.51807e+07	6.17228e+06	3.59352e+07	1.86458e+07	1.2817e+07	3.32275e+07	1.54578e+07	2.24583e+07	2.25742e+07	2.24602e+07
PE(36:1)+Na	PE(36:1)+Na	PE	(36:1)	(36:1)				C41 H80 O8 N1 P1 Na1	768.551	12.8154	0.00558122	3.18089e+07	3.23742e+07	4.46457e+07	2.85616e+07	4.52764e+07	4.38626e+07	3.09487e+07	3.34337e+07	3.07307e+07	1.44879e+07	3.34845e+07	3.32087e+07	3.31312e+07
PC(35:4)+H	PC(35:4)+H	PC	(35:4)	(35:4)				C43 H79 O8 N1 P1	768.554	10.0579	0.0104933	4.46895e+06	5.12629e+06	2.47661e+06	2.3811e+06	3.82434e+06	3.80684e+06	3.7009e+06	3.87702e+06	3.65377e+06	2.0612e+06	3.05326e+06	3.05411e+06	3.10952e+06
PC(36:4e)+H	PC(36:4e)+H	PC	(36:4e)	(36:4e)				C44 H83 O7 N1 P1	768.59	11.4746	0.00589465	8.0691e+07	8.28426e+07	8.78546e+07	6.93041e+07	9.54772e+07	1.91622e+08	1.35898e+08	102695738	8.41217e+07	8.67402e+07	1.03824e+08	102753453	1.02789e+08
PC(36:4e)+H	PC(36:4e)+H	PC	(36:4e)	(36:4e)				C44 H83 O7 N1 P1	768.59	11.7673	0.121308	1.89995e+07	1.3426e+07	1.83201e+07	6.00346e+06	2.0092e+07	1.87756e+07	1.84406e+07	1.68387e+07	9.64081e+06	1.13063e+07	2.04912e+07	2.51835e+07	2.0595e+07
PC(36:4e)+H	PC(36:4e)+H	PC	(36:4e)	(36:4e)				C44 H83 O7 N1 P1	768.59	11.1999	0.00591194	2.18349e+08	2.36927e+08	2.21592e+08	158425679	225544056	7.29914e+08	4.21891e+08	2.93437e+08	2.88318e+08	2.27251e+08	3.07063e+08	3.07065e+08	3.0393e+08
TG(18:0/10:0/16:0)+NH4	TG(44:0)+NH4	TG	(18:0/10:0/16:0)	(18:0)	(10:0)	(16:0)		C47 H94 O6 N1	768.708	20.2074	0.00398052	9.37826e+06	362752	227822	2.50591e+08	6.56902e+06	1.94193e+08	9.05678e+07	1.66626e+08	2.54742e+08	7.21128e+07	1.1014e+08	110905277	1.10901e+08
Cer(d18:2/24:1)+HCOO	Cer(d42:3)+HCOO	Cer	(d18:2/24:1)	(d18:2)	(24:1)			C43 H80 O5 N1	690.604	13.9977	0.00320234	1.41143e+08	1.65449e+08	1.43207e+08	6.63505e+07	9.94005e+07	7.65793e+07	8.35674e+07	1.50705e+08	1.18365e+08	9.97154e+07	1.08384e+08	1.08393e+08	1.08991e+08
CerG1(d38:3)+NH4	CerG1(d38:3)+NH4	CerG1	(d38:3)	(d38:3)				C44 H85 O8 N2	769.63	17.7844	0.0181878	1.10585e+07	598878	163415	1.49867e+08	1.76652e+07	1.14583e+08	6.01759e+07	6.77855e+07	1.11525e+08	4.94262e+07	7.50555e+07	7.74185e+07	7.50049e+07
PE(38:6p)+Na	PE(38:6p)+Na	PE	(18:2p/20:4)	(18:2p)	(20:4)			C43 H74 O7 N1 P1 Na1	770.51	10.6629	0.00412056	1.16437e+07	1.33003e+07	1.47397e+07	9.71213e+06	1.40884e+07	1.16116e+07	1.05822e+07	7.00119e+06	8.62293e+06	6.59074e+06	1.09349e+07	1.08574e+07	1.09355e+07
PE(18:0/18:0)+Na	PE(36:0)+Na	PE	(18:0/18:0)	(18:0)	(18:0)			C41 H82 O8 N1 P1 Na1	770.567	12.5753	0.00253604	3.72862e+07	2.9526e+07	2.96027e+07	1.28307e+07	5.67224e+06	2.6133e+07	1.77994e+07	4.33022e+07	2.05457e+07	1.42103e+07	2.43586e+07	2.42522e+07	2.42517e+07
PE(18:0/18:0)+Na	PE(36:0)+Na	PE	(18:0/18:0)	(18:0)	(18:0)			C41 H82 O8 N1 P1 Na1	770.567	12.261	0.00338558	3.35547e+07	3.51897e+07	3.52534e+07	2.65931e+07	4.89814e+07	7.69422e+07	6.14386e+07	3.83741e+07	3.47758e+07	3.10612e+07	3.97188e+07	3.94861e+07	3.97183e+07
PC(36:2p)+H	PC(36:2p)+H	PC	(36:2p)	(36:2p)				C44 H85 O7 N1 P1	770.606	12.0721	0.00285802	4.0423e+07	5.63576e+07	6.79414e+07	5.26787e+07	6.70305e+07	7.67679e+07	4.54008e+07	5.58883e+07	4.52496e+07	4.09819e+07	4.84907e+07	4.8491e+07	4.82512e+07
PC(36:2p)+H	PC(36:2p)+H	PC	(36:2p)	(36:2p)				C44 H85 O7 N1 P1	770.606	11.4232	0.00789526	4.69485e+07	4.71045e+07	6.08779e+07	5.13231e+07	6.2324e+07	2.99372e+08	1.32655e+08	7.35382e+07	1.12472e+08	1.14569e+08	3.64922e+07	3.64909e+07	3.59948e+07
PG(34:1)+Na	PG(34:1)+Na	PG	(34:1)	(34:1)				C40 H77 O10 N0 P1 Na1	771.515	10.6773	0.00596597	4.38e+07	5.11135e+07	4.13063e+07	2.96178e+07	3.82363e+07	5.96366e+07	4.6687e+07	5.40108e+07	5.04074e+07	3.86158e+07	4.48763e+07	4.51788e+07	4.54137e+07
CerG1(d38:2)+NH4	CerG1(d38:2)+NH4	CerG1	(d38:2)	(d38:2)				C44 H87 O8 N2	771.646	18.9171	0.002807	1.17003e+07	867239	382621	8.99219e+07	14530501	1.68768e+08	8.74941e+07	1.153e+08	1.64222e+08	7.04966e+07	8.61487e+07	8.57304e+07	8.57319e+07
PE(38:6e)+Na	PE(38:6e)+Na	PE	(38:6e)	(38:6e)				C43 H76 O7 N1 P1 Na1	772.525	11.4221	0.000431978	9.38628e+07	1.05965e+08	1.12941e+08	6.45515e+07	9.78933e+07	8.22865e+07	7.64922e+07	8.59331e+07	7.26763e+07	51374128	8.35786e+07	8.35784e+07	8.3516e+07
PC(35:2)+H	PC(35:2)+H	PC	(35:2)	(35:2)				C43 H83 O8 N1 P1	772.585	11.1233	0.0273373	4.94963e+07	4.98189e+07	5.28854e+07	4.56685e+07	8.25349e+07	5.99299e+07	5.43902e+07	6.19101e+07	3.87902e+07	2.69971e+07	5.30547e+07	5.55601e+07	5.29672e+07
PC(36:2e)+H	PC(36:2e)+H	PC	(36:2e)	(36:2e)				C44 H87 O7 N1 P1	772.621	12.1584	0.0337518	4.06477e+07	4.39808e+07	5.36242e+07	3.17441e+07	8.32018e+07	2.10916e+08	1.16454e+08	7.58174e+07	8.22689e+07	101473630	8.60642e+07	8.12768e+07	8.11683e+07
PC(36:2e)+H	PC(36:2e)+H	PC	(36:2e)	(36:2e)				C44 H87 O7 N1 P1	772.621	12.9887	0.00223456	1.07234e+07	1.35416e+07	1.54859e+07	1.23105e+07	1.66276e+07	2.44137e+07	9.97797e+06	1.24847e+07	1.2273e+07	5.66813e+06	1.03506e+07	1.03909e+07	1.03511e+07
SM(d39:1)+H	SM(d39:1)+H	SM	(d39:1)	(d39:1)				C44 H90 O6 N2 P1	773.653	13.0521	0.00327722	1.06874e+07	1.24929e+07	1.01943e+07	8.66828e+06	1.21382e+07	1.32819e+07	1.35677e+07	9.57943e+06	8.55889e+06	4.52767e+06	1.01696e+07	1.01691e+07	1.01118e+07
CerG1(d38:1)+NH4	CerG1(d38:1)+NH4	CerG1	(d38:1)	(d38:1)				C44 H89 O8 N2	773.661	20.2181	0.00339372	1.17936e+07	823972	597210	5.35175e+07	7.6935e+06	3.51821e+07	2.75154e+07	6.95505e+07	38567538	2.26399e+07	3.55752e+07	3.5391e+07	3.56178e+07
PE(38:4p)+Na	PE(38:4p)+Na	PE	(18:0p/20:4)	(18:0p)	(20:4)			C43 H78 O7 N1 P1 Na1	774.541	12.3351	0.00231934	1.24571e+08	9.3854e+07	118350835	107057407	1.10811e+08	9.34774e+07	9.26401e+07	9.05787e+07	6.62609e+07	5.61672e+07	9.08796e+07	9.0515e+07	9.08795e+07
PE(18:1p/22:6)+H	PE(40:7p)+H	PE	(18:1p/22:6)	(18:1p)	(22:6)			C45 H77 O7 N1 P1	774.543	11.1196	0.00163432	2.01776e+07	2.36938e+07	1.99255e+07	1.29229e+07	1.93754e+07	1.22153e+08	3.87952e+07	4.29089e+07	3.3875e+07	2.2475e+07	3.17389e+07	3.16659e+07	3.16388e+07
PC(35:1)+H	PC(35:1)+H	PC	(35:1)	(35:1)				C43 H85 O8 N1 P1	774.601	11.9645	0.017605	1.50464e+08	1.61536e+08	1.50567e+08	9.79456e+07	2.35033e+08	1.68257e+08	1.18066e+08	1.66045e+08	1.2986e+08	5.89294e+07	1.37377e+08	1.37378e+08	1.41609e+08
PE(38:1)+H	PE(38:1)+H	PE	(38:1)	(38:1)				C43 H85 O8 N1 P1	774.601	13.8123	0.00143873	4.24645e+06	4019695	6.1775e+06	3.83809e+06	6.25497e+06	5.07615e+06	4.06191e+06	3.84578e+06	3.44637e+06	1.91349e+06	4.09325e+06	4.09324e+06	4.10345e+06
PC(36:1e)+H	PC(36:1e)+H	PC	(36:1e)	(36:1e)				C44 H89 O7 N1 P1	774.637	13.1539	0.0207474	7.2313e+06	5.47264e+06	6.74741e+06	6.77845e+06	8.95122e+06	2.60722e+07	1.06957e+07	1.27976e+07	1.10856e+07	9.31666e+06	1.07418e+07	1.07417e+07	1.03603e+07
PC(35:0)+H	PC(35:0)+H	PC	(35:0)	(35:0)				C43 H87 O8 N1 P1	776.616	12.7419	0.0424705	2.95302e+06	2.61669e+06	3.08977e+06	2.58623e+06	4.50863e+06	1.52059e+07	1.47798e+07	1.40918e+07	1.17377e+07	7.58732e+06	9.57072e+06	9.56692e+06	8.88178e+06
TG(9:0/18:1/18:2)+NH4	TG(45:3)+NH4	TG	(9:0/18:1/18:2)	(9:0)	(18:1)	(18:2)		C48 H90 O6 N1	776.676	17.2192	0.00124475	29669.3			5.00571e+06	341443	1.82281e+06	823259	300663	1.74343e+06	862484	1.49414e+06	1.49736e+06	1.49414e+06
PC(34:3)+Na	PC(34:3)+Na	PC	(34:3)	(34:3)				C42 H78 O8 N1 P1 Na1	778.536	9.92236	0.0546389	1.77243e+06	1.90996e+06	3.19055e+06	1.64515e+06	2.86582e+06	5.46293e+06	5.44872e+06	1.09347e+06	3.47403e+06	2.19813e+06	2.11518e+06	1.92173e+06	2.1165e+06
PC(34:3)+Na	PC(34:3)+Na	PC	(34:3)	(34:3)				C42 H78 O8 N1 P1 Na1	778.536	10.2107	0.0268793	1.7492e+06	1.74667e+06	1.35569e+06	1.04883e+06	1.67381e+06	3.1224e+06	2.95701e+06	1.52349e+06	1.38022e+06	1.02618e+06	1.82567e+06	1.74298e+06	1.82774e+06
PE(18:1p/22:4)+H	PE(40:5p)+H	PE	(18:1p/22:4)	(18:1p)	(22:4)			C45 H81 O7 N1 P1	778.575	12.1006	0.00276955	8.90454e+07	1.11562e+08	9.83704e+07	4.74722e+07	8.49023e+07	1.26058e+08	7.97816e+07	7.38819e+07	7.61957e+07	4.60735e+07	8.06017e+07	8.06028e+07	8.09895e+07
PE(18:0p/22:5)+H	PE(40:5p)+H	PE	(18:0p/22:5)	(18:0p)	(22:5)			C45 H81 O7 N1 P1	778.575	12.7022	0.00197092	9.34836e+06	7.66458e+06	9.91553e+06	7.1329e+06	1.15955e+07	1.0634e+07	1.07832e+07	1.11821e+07	8.36384e+06	4.30472e+06	8.71023e+06	8.73858e+06	8.74129e+06
SM(d40:5)+H	SM(d40:5)+H	SM	(d40:5)	(d40:5)				C45 H84 O6 N2 P1	779.606	11.6438	0.00492253	5.02236e+07	4.79319e+07	5.92249e+07	3.32808e+07	5.97615e+07	2.02876e+07	1.75938e+07	2.95113e+07	2.19871e+07	1.48438e+07	3.34039e+07	3.31206e+07	3.34053e+07
PE(18:1p/22:3)+H	PE(40:4p)+H	PE	(18:1p/22:3)	(18:1p)	(22:3)			C45 H83 O7 N1 P1	780.59	13.0398	0.00501416	1.19582e+08	1.01815e+08	1.13022e+08	9.16595e+07	1.12627e+08	8.26918e+07	9.91927e+07	7.83031e+07	6.27652e+07	4.45884e+07	8.44645e+07	8.44462e+07	8.37242e+07
PE(20:0p/20:4)+H	PE(40:4p)+H	PE	(20:0p/20:4)	(20:0p)	(20:4)			C45 H83 O7 N1 P1	780.59	13.3641	0.0129693	1.23792e+07	9.8475e+06	1.1488e+07	1.05794e+07	8.8434e+06	1.18633e+07	1.29989e+07	8.61157e+06	8.58523e+06	7.79538e+06	1.09935e+07	1.12418e+07	1.09924e+07
PE(18:0p/22:4)+H	PE(40:4p)+H	PE	(18:0p/22:4)	(18:0p)	(22:4)			C45 H83 O7 N1 P1	780.59	12.229	0.0364195	1.42513e+07	1.38987e+07	1.58053e+07	3.75202e+06	8.1509e+06	1.31458e+07	1.02178e+07	8.11398e+06	1.09359e+07	3.82071e+06	7.37411e+06	6.92576e+06	6.9297e+06
TG(17:0/10:0/18:1)+NH4	TG(45:1)+NH4	TG	(17:0/10:0/18:1)	(17:0)	(10:0)	(18:1)		C48 H94 O6 N1	780.708	19.586	0.0187846	124544	69399.5	54249.6	9.98491e+06	374327	1.76207e+07	8.73476e+06	5.6098e+06	1.83665e+07	5.72185e+06	7.35478e+06	7.22611e+06	7.08359e+06
PE(34:2p)-H	PE(34:2p)-H	PE	(34:2p)	(34:2p)				C39 H73 O7 N1 P1	698.513	11.5676	0.0110066	1.50422e+07	1.49967e+07	2.07195e+07	1.34726e+07	2.34303e+07	1.76374e+07	1.7427e+07	1.45298e+07	1.01321e+07	9.78524e+06	1.51862e+07	1.51862e+07	1.54776e+07
SM(d38:1)+Na	SM(d38:1)+Na	SM	(d38:1)	(d38:1)				C43 H87 O6 N2 P1 Na1	781.619	12.5252	0.00903085	7.41837e+07	6.66143e+07	7.21393e+07	6.46633e+07	8.14565e+07	1.22073e+08	1.15738e+08	6.92912e+07	9.0863e+07	5.0925e+07	8.48338e+07	8.48392e+07	8.35164e+07
PC(36:4)+H	PC(36:4)+H	PC	(16:0/20:4)	(16:0)	(20:4)			C44 H81 O8 N1 P1	782.569	10.5935	0.00452953	1705980010	1840878789	1613147233	1054040839	1541954776	2442170365	2197396929	1747265219	1633550163	1266856493	1729059463	1742649409	1729038154
PC(34:1)+Na	PC(34:1)+Na	PC	(34:1)	(34:1)				C42 H82 O8 N1 P1 Na1	782.567	11.8421	0.0349517	1.05572e+08	1.51075e+07	1.66392e+07	1.24099e+07	2.21536e+07	2.80774e+07	2.13359e+07	2.21326e+07	1.82927e+07	1.17289e+07	1.95478e+07	1.83859e+07	1.95436e+07
PC(36:4)+H	PC(36:4)+H	PC	(36:4)	(36:4)				C44 H81 O8 N1 P1	782.569	10.2914	0.00158743	2.29003e+07	2.23607e+07	2.35206e+07	1.66986e+07	2.49373e+07	4.89953e+07	3.80176e+07	2.61219e+07	2.69846e+07	2.33131e+07	3.11135e+07	3.11706e+07	3.1212e+07
PC(36:4)+H	PC(36:4)+H	PC	(18:2/18:2)	(18:2)	(18:2)			C44 H81 O8 N1 P1	782.569	10.0269	0.00296282	7.93062e+07	6.94552e+07	8.1798e+07	9.86974e+07	1.13031e+08	1.26825e+08	9.24731e+07	4.78474e+07	5.40217e+07	4.67185e+07	8.2871e+07	8.24052e+07	8.27697e+07
PE(18:0p/22:3)+H	PE(40:3p)+H	PE	(18:0p/22:3)	(18:0p)	(22:3)			C45 H85 O7 N1 P1	782.606	13.8854	0.047364	5.02397e+06	3.31505e+06	3.72421e+06	2.33877e+06	5.07544e+06	2.03607e+06	2.40195e+06	5.83955e+06	1.86753e+06	1.51485e+06	3.7692e+06	3.48115e+06	3.47113e+06
SM(d40:3)+H	SM(d40:3)+H	SM	(d40:3)	(d40:3)				C45 H88 O6 N2 P1	783.637	12.9001	0.00347928	3.72651e+06	4.18385e+06	5.3615e+06	3.2515e+06	4.53634e+06	9.46401e+06	6.76866e+06	4.17181e+06	4.63345e+06	1.29855e+06	4.12402e+06	4.14704e+06	4.15053e+06
PC(36:3)+H	PC(36:3)+H	PC	(16:0/20:3)	(16:0)	(20:3)			C44 H83 O8 N1 P1	784.585	11.3421	0.0127647	1.17235e+08	1.12728e+08	1.01196e+08	5.32016e+07	142693189	2.24759e+08	1.43001e+08	1.49641e+08	1.03136e+08	9.59097e+07	117841024	1.20875e+08	1.19131e+08
PC(36:3)+H	PC(36:3)+H	PC	(16:0/20:3)	(16:0)	(20:3)			C44 H83 O8 N1 P1	784.585	10.8458	0.0677588	3.91842e+08	4.15118e+08	435446937	1.23002e+08	3.87282e+08	1129839780	8.20286e+08	3.38122e+08	4.77427e+08	4.40746e+08	3.77991e+08	3.3572e+08	3.3807e+08
SM(d40:2)+H	SM(d40:2)+H	SM	(d40:2)	(d40:2)				C45 H90 O6 N2 P1	785.653	12.4983	0.00230638	1.76446e+08	1.79228e+08	1.87043e+08	1.09376e+08	2.08488e+08	1.2679e+08	8.62853e+07	1.36208e+08	1.56918e+08	5.58995e+07	1.22978e+08	1.22488e+08	1.22488e+08
PE(34:1p)-H	PE(34:1p)-H	PE	(34:1p)	(34:1p)				C39 H75 O7 N1 P1	700.529	12.3513	0.00743113	7.07024e+07	7.76329e+07	9.56816e+07	5.67696e+07	1.14945e+08	8.17848e+07	9.2504e+07	1.06324e+08	6.082e+07	4.16437e+07	7.25737e+07	7.16455e+07	7.16495e+07
PC(36:2)+H	PC(36:2)+H	PC	(18:1/18:1)	(18:1)	(18:1)			C44 H85 O8 N1 P1	786.601	11.6553	0.0609696	2708182455	1704469959	2082480335	2938766703	2594735151	5337657403	2758835068	1923402404	2124120710	1564048201	2851635783	2571402248	2569214676
TG(10:0/18:2/18:3)+NH4	TG(46:5)+NH4	TG	(10:0/18:2/18:3)	(10:0)	(18:2)	(18:3)		C49 H88 O6 N1	786.661	15.7374	0.00395202	139078			1.19153e+07	655318	1.97053e+06	691179	359071	1.55512e+06	637634	2.35944e+06	2.35952e+06	2.37567e+06
SM(d40:1)+H	SM(d40:1)+H	SM	(d40:1)	(d40:1)				C45 H92 O6 N2 P1	787.669	13.5899	0.00599574	5.00873e+08	4.72088e+08	4.60806e+08	4.14607e+08	5.10753e+08	1110878268	7.73892e+08	6.40579e+08	5.27239e+08	2.85896e+08	5.54389e+08	5.54392e+08	5.48653e+08
PS(18:1/18:1)+H	PS(36:2)+H	PS	(18:1/18:1)	(18:1)	(18:1)			C42 H79 O10 N1 P1	788.544	10.7758	0.00972439	1.77938e+07	1.29083e+07	1.34891e+07	1.86262e+07	1.889e+07	5.53858e+07	8.89693e+07	4.29745e+07	2.63604e+07	2.50908e+07	2.82184e+07	2.77525e+07	2.77443e+07
PC(36:4p)+Na	PC(36:4p)+Na	PC	(36:4p)	(36:4p)				C44 H80 O7 N1 P1 Na1	788.556	11.0362	0.00265726	2.41774e+08	2.6527e+08	2.5129e+08	1.63602e+08	224859891	2.06446e+08	2.44014e+08	1.93911e+08	1.37615e+08	1.04525e+08	2.01831e+08	2.01842e+08	2.02767e+08
PC(36:1)+H	PC(36:1)+H	PC	(36:1)	(36:1)				C44 H87 O8 N1 P1	788.616	12.5024	0.00442972	3033769390	3174452532	4188338367	2408224680	4299544735	3767698537	2617502913	3084305348	2559516765	1222535554	2843879278	2865752670	2843874842
TG(10:0/18:2/18:2)+NH4	TG(46:4)+NH4	TG	(10:0/18:2/18:2)	(10:0)	(18:2)	(18:2)		C49 H90 O6 N1	788.676	16.7081	0.0014437	3.08844e+06	156385	23722.1	1.72774e+08	6.95894e+06	2.47538e+07	11386398	7.6453e+06	2.44709e+07	9.07021e+06	3.05376e+07	3.05271e+07	3.04566e+07
SM(d40:0)+H	SM(d40:0)+H	SM	(d40:0)	(d40:0)				C45 H94 O6 N2 P1	789.684	14.0141	0.00313247	8.20601e+06	7.79594e+06	8.30689e+06	7.85774e+06	7.18768e+06	2.14304e+07	1.51671e+07	1.32773e+07	1.21176e+07	6.30731e+06	1.07212e+07	1.0663e+07	1.07209e+07
PE(18:1/22:6)+H	PE(40:7)+H	PE	(18:1/22:6)	(18:1)	(22:6)			C45 H77 O8 N1 P1	790.538	10.6802	0.0210511	950261	1.25736e+07	9.89315e+06	8.10974e+06	9.99014e+06	5.35681e+07	2.61282e+07	2.34115e+07	2.92555e+07	1.57261e+07	2.0611e+07	2.12301e+07	2.14726e+07
PS(36:1)+H	PS(36:1)+H	PS	(36:1)	(36:1)				C42 H81 O10 N1 P1	790.559	11.942	0.0295943	8.42637e+07	1.24217e+08	1.87294e+08	7.8631e+07	1.36275e+08	8.47549e+07	1.01035e+08	77561047	1.05097e+08	3.6862e+07	9.25472e+07	8.78844e+07	9.25501e+07
PE(16:0/18:2)-H	PE(34:2)-H	PE	(16:0/18:2)	(16:0)	(18:2)			C39 H73 O8 N1 P1	714.508	11.0632	0.00230166	1.44181e+07	7.02349e+06	6.38137e+06	1.41682e+07	1.53936e+07	3.89293e+07	2.10984e+07	1.76812e+07	1.17129e+07	9.76687e+06	1.48782e+07	1.48103e+07	1.48371e+07
PS(36:1)+H	PS(36:1)+H	PS	(36:1)	(36:1)				C42 H81 O10 N1 P1	790.559	11.6073	0.0535669	3.72024e+08	3.14384e+08	4.04831e+08	2.97342e+08	3.94707e+08	3.33165e+08	3.44651e+08	3.33496e+08	226984877	146470640	2.96973e+08	2.703e+08	297089629
PC(36:4e)+Na	PC(36:4e)+Na	PC	(36:4e)	(36:4e)				C44 H82 O7 N1 P1 Na1	790.572	11.1999	0.0193129	4.26054e+07	4.77792e+07	4.47589e+07	3.18326e+07	4.37715e+07	1.24028e+08	7.76487e+07	5.90052e+07	5.58568e+07	4.47594e+07	5.74775e+07	5.9418e+07	5.747e+07
PC(38:6p)+H	PC(38:6p)+H	PC	(38:6p)	(38:6p)				C46 H81 O7 N1 P1	790.575	10.7194	0.00319557	7.53264e+07	7.73e+07	6.2938e+07	4.72614e+07	6.42918e+07	1.8137e+08	1.57532e+08	1.2735e+08	8.49566e+07	7.33599e+07	9.27824e+07	9.22696e+07	9.2782e+07
PC(36:4e)+Na	PC(36:4e)+Na	PC	(36:4e)	(36:4e)				C44 H82 O7 N1 P1 Na1	790.572	11.4746	0.00320974	1.21891e+07	1.25719e+07	1.27818e+07	1.32782e+07	1.51071e+07	2.48141e+07	2.50286e+07	1.57992e+07	1.5378e+07	1.59381e+07	1.75827e+07	1.75829e+07	1.74852e+07
PC(36:0)+H	PC(36:0)+H	PC	(36:0)	(36:0)				C44 H89 O8 N1 P1	790.632	13.4699	0.00497668	1.73115e+07	1.64588e+07	1.97794e+06	1.18471e+07	1.82029e+07	1.25352e+06	1.5688e+07	1.49282e+07	1.06703e+07	7.79323e+06	1.5093e+07	1.5223e+07	1.50922e+07
TG(10:0/18:1/18:2)+NH4	TG(46:3)+NH4	TG	(10:0/18:1/18:2)	(10:0)	(18:1)	(18:2)		C49 H92 O6 N1	790.692	17.8312	0.00163454	8.70864e+06	413097	55280	3.45885e+08	1.57931e+07	1.51913e+08	5.9882e+07	4.46956e+07	1.36625e+08	4.41728e+07	9.08642e+07	9.10272e+07	9.07306e+07
PC(37:6)+H	PC(37:6)+H	PC	(37:6)	(37:6)				C45 H79 O8 N1 P1	792.554	11.561	0.00591057	3.86139e+07	4.34552e+07	5.07946e+07	3.5126e+07	4.95629e+07	7.1356e+07	4.74563e+07	4.30934e+07	3.83231e+07	2.01227e+07	3.49522e+07	3.49531e+07	3.4596e+07
PC(38:6e)+H	PC(38:6e)+H	PC	(38:6e)	(38:6e)				C46 H83 O7 N1 P1	792.59	11.0997	0.00269845	4.14778e+08	5.57346e+08	4.94884e+08	2.45159e+08	3.92567e+08	5.10073e+08	3.36468e+08	3.56738e+08	2.6166e+08	1.82174e+08	3.48208e+08	3.49839e+08	3.48209e+08
PC(38:6e)+H	PC(38:6e)+H	PC	(38:6e)	(38:6e)				C46 H83 O7 N1 P1	792.59	11.4071	0.00358699	6.78476e+07	7.77807e+07	7.40704e+07	4.2213e+07	6.17654e+07	9.83103e+07	7.75019e+07	6.18302e+07	5.38614e+07	4.69217e+07	6.70257e+07	6.70286e+07	6.74444e+07
PC(38:6e)+H	PC(38:6e)+H	PC	(38:6e)	(38:6e)				C46 H83 O7 N1 P1	792.59	10.4348	0.00800586	2.87308e+07	3.64806e+07	3.66719e+07	2.2371e+07	2.39263e+07	7.55569e+07	5.49945e+07	2.37306e+07	3.10113e+07	2.88315e+07	3.75756e+07	3.7574e+07	3.80982e+07
PE(16:0/18:1)-H	PE(34:1)-H	PE	(16:0/18:1)	(16:0)	(18:1)			C39 H75 O8 N1 P1	716.524	11.8323	0.00704817	2.49539e+07	1.90876e+07	2.2164e+07	2.18287e+07	3.29977e+07	6.57251e+07	3.83689e+07	4.19081e+07	2.69879e+07	2.29618e+07	3.01851e+07	3.05559e+07	3.05573e+07
TG(10:0/18:1/18:1)+NH4	TG(46:2)+NH4	TG	(10:0/18:1/18:1)	(10:0)	(18:1)	(18:1)		C49 H94 O6 N1	792.708	19.056	0.0618796	1.03242e+07	1.25936e+06	436738	7.65262e+08	2.13349e+07	2.47672e+08	2.70834e+08	130387832	3.7377e+08	1.55604e+08	2.52434e+08	281597608	2.81546e+08
PC(37:5)+H	PC(37:5)+H	PC	(37:5)	(37:5)				C45 H81 O8 N1 P1	794.569	11.8465	0.00170382	2.68446e+07	3.30488e+07	3.62942e+07	1.79302e+07	3.72522e+07	2.60375e+07	2.16349e+07	1.03624e+07	2.08895e+07	1.10645e+07	2.35296e+07	2.35991e+07	2.35991e+07
PC(37:5)+H	PC(37:5)+H	PC	(37:5)	(37:5)				C45 H81 O8 N1 P1	794.569	10.1547	0.00926388	2.0377e+06	2.78665e+06	1.68694e+06	1.29247e+06	2.46344e+06	2.40876e+06	2.27525e+06	2.01404e+06	2.32801e+06	1.02507e+06	1.90461e+06	1.90453e+06	1.87418e+06
PC(18:1p/18:0)+Na	PC(36:1p)+Na	PC	(18:1p/18:0)	(18:1p)	(18:0)			C44 H86 O7 N1 P1 Na1	794.603	11.9954	0.00182323	1.33168e+08	3.24776e+08	144526962	125390535	1.31938e+08	1.37701e+08	1.1141e+08	102713151	7.83466e+07	5.23176e+07	1.10166e+08	1.10515e+08	1.10514e+08
PC(38:4p)+H	PC(38:4p)+H	PC	(38:4p)	(38:4p)				C46 H85 O7 N1 P1	794.606	11.7246	0.00213833	1.3805e+08	1.5542e+08	1.47485e+08	8.4246e+07	1.44103e+08	1.41144e+08	130410501	1.07088e+08	8.63723e+07	6.44444e+07	1.1409e+08	1.14092e+08	1.13669e+08
PC(38:4p)+H	PC(38:4p)+H	PC	(38:4p)	(38:4p)				C46 H85 O7 N1 P1	794.606	11.2427	0.0021907	6.09987e+08	6.66923e+08	6.59722e+08	4.15125e+08	5.91547e+08	1660274260	1030657574	7.94445e+08	7.50156e+08	6.85103e+08	7.37835e+08	7.35044e+08	7.35041e+08
PC(38:4p)+H	PC(38:4p)+H	PC	(38:4p)	(38:4p)				C46 H85 O7 N1 P1	794.606	12.3569	0.00881219	1.1479e+07	9.70026e+06	1.02894e+07	2.73009e+07	9.41882e+06	2.86699e+07	1.34779e+07	1.34408e+07	1.27638e+07	1.21807e+07	1.3782e+07	1.35727e+07	1.35747e+07
TG(16:0/12:0/18:1)+NH4	TG(46:1)+NH4	TG	(16:0/12:0/18:1)	(16:0)	(12:0)	(18:1)		C49 H96 O6 N1	794.723	20.2147	0.00971619	1.80378e+07	1.12409e+06	716497	5.44533e+08	1.81656e+07	9.12072e+08	4.61338e+08	4.16985e+08	1018521477	4.09306e+08	4.08202e+08	4.15143e+08	4.15156e+08
CerG1(d40:4)+NH4	CerG1(d40:4)+NH4	CerG1	(d40:4)	(d40:4)				C46 H87 O8 N2	795.646	17.8288	0.00268024	1.98623e+07	1.09141e+06	324836	3.21792e+08	3.59367e+07	1.97481e+08	1.00315e+08	8.38307e+07	1.89968e+08	7.60799e+07	1.43389e+08	1.43395e+08	1.44059e+08
CerG1(d40:4)+NH4	CerG1(d40:4)+NH4	CerG1	(d40:4)	(d40:4)				C46 H87 O8 N2	795.646	18.079	0.0267021	4.09635e+06	170473	39288.4	5.15307e+07	6.65196e+06	3.52095e+07	2.29807e+07	2.02191e+07	4.30087e+07	1.99919e+07	2.70755e+07	2.5842e+07	2.70748e+07
Cer(d18:2/26:1)+HCOO	Cer(d44:3)+HCOO	Cer	(d18:2/26:1)	(d18:2)	(26:1)			C45 H84 O5 N1	718.635	15.1828	0.00886581	2.95472e+06	3.92448e+06	2.48106e+06	2.04425e+06	1.95599e+06	2.25964e+06	2.4572e+06	3.0708e+06	2.91912e+06	2.29054e+06	2.44208e+06	2.44272e+06	2.48009e+06
LPE(20:4)-H	LPE(20:4)-H	LPE	(20:4)	(20:4)				C25 H43 O7 N1 P1	500.278	2.25205	0.0030682	5.52311e+06	5.00011e+06	4.88236e+06	5.24844e+06	5.20668e+06	8.69913e+06	7.09997e+06	7.80627e+06	6.02771e+06	5.88005e+06	6.6664e+06	6.66638e+06	6.70188e+06
PC(37:4)+H	PC(37:4)+H	PC	(37:4)	(37:4)				C45 H83 O8 N1 P1	796.585	10.9265	0.00395562	8.03711e+07	9.69699e+07	5.88547e+07	4.06718e+07	7.84505e+07	7.91369e+07	5.44871e+07	6.03762e+07	5.38075e+07	2.60611e+07	6.02353e+07	6.02299e+07	59820901
PE(40:4)+H	PE(40:4)+H	PE	(40:4)	(40:4)				C45 H83 O8 N1 P1	796.585	12.5275	0.00579537	1.45714e+08	154097726	154936213	7.02581e+07	1.35003e+08	1.04149e+08	9.53828e+07	7.68576e+07	8.1667e+07	4.03031e+07	9.94692e+07	1.0047e+08	9.94678e+07
PC(37:4)+H	PC(37:4)+H	PC	(37:4)	(37:4)				C45 H83 O8 N1 P1	796.585	12.0114	0.00322433	3.33103e+07	3.50064e+07	3.11027e+07	3.06813e+07	5.40042e+07	1.18972e+07	2.45551e+07	4.64779e+07	3.26188e+07	3.44778e+07	3.10808e+07	3.09063e+07	3.09095e+07
PC(38:4e)+H	PC(38:4e)+H	PC	(38:4e)	(38:4e)				C46 H87 O7 N1 P1	796.621	11.6739	0.0017994	3.17306e+07	3.32336e+07	3.22129e+07	2.62125e+07	4.34306e+07	2.6983e+08	1.16133e+08	6.72537e+07	8.30803e+07	1.30113e+08	8.35629e+07	8.38226e+07	8.35609e+07
PC(38:4e)+H	PC(38:4e)+H	PC	(38:4e)	(38:4e)				C46 H87 O7 N1 P1	796.621	12.1616	0.00492288	8.8763e+07	6.4907e+07	7.08095e+07	7.32022e+07	8.01693e+07	1.73029e+08	1.22804e+08	9.73983e+07	7.84702e+07	7.20879e+07	9.2232e+07	9.22294e+07	9.14465e+07
PC(38:4e)+H	PC(38:4e)+H	PC	(38:4e)	(38:4e)				C46 H87 O7 N1 P1	796.621	12.4438	0.0102696	2.28327e+07	1.82203e+07	1.86529e+07	2.20766e+07	2.23621e+07	3.5341e+07	2.4815e+07	2.72551e+07	1.44594e+07	1.48455e+07	2.09799e+07	2.06096e+07	2.09812e+07
TG(16:0/14:0/16:0)+NH4	TG(46:0)+NH4	TG	(16:0/14:0/16:0)	(16:0)	(14:0)	(16:0)		C49 H98 O6 N1	796.739	21.3465	0.00630729	2.88317e+07	1.8105e+06	846420	2.70806e+08	1.76823e+07	2.24343e+08	2.23273e+08	3.13035e+08	2.85545e+08	2.21341e+08	2.22142e+08	2.19725e+08	2.22145e+08
CerG1(d40:3)+NH4	CerG1(d40:3)+NH4	CerG1	(d40:3)	(d40:3)				C46 H89 O8 N2	797.661	19.0215	0.0360686	2.10461e+07	3.45043e+06	1.11758e+06	1.66887e+08	2.29525e+07	5.35635e+08	1.92279e+08	1.75273e+08	4.82579e+08	2.41883e+08	235278517	2.50703e+08	2.50527e+08
PC(37:3)+H	PC(37:3)+H	PC	(37:3)	(37:3)				C45 H85 O8 N1 P1	798.601	11.5009	0.0388592	8.81929e+06	9.86125e+06	6.22173e+06	6.5678e+06	1.36991e+07	1.65964e+07	1.35762e+07	1.0993e+07	1.49991e+07	7.34191e+06	1.23228e+07	1.22694e+07	1.31414e+07
PE(40:3)+H	PE(40:3)+H	PE	(40:3)	(40:3)				C45 H85 O8 N1 P1	798.601	13.3095	0.0102159	8.49907e+06	8.01286e+06	6.64651e+06	2.66099e+06	8.05149e+06	3.58898e+06	2.77669e+06	8.07408e+06	4.16235e+06	2.71789e+06	5.15728e+06	5.24965e+06	5.24959e+06
SM(d32:1)+HCOO	SM(d32:1)+HCOO	SM	(d32:1)	(d32:1)				C38 H76 O8 N2 P1	719.534	9.25543	0.0119418	5.12132e+06	5.91815e+06	5.31827e+06	3.64896e+06	5.623e+06	9.29099e+06	8.9691e+06	6.19095e+06	8.36928e+06	4.34916e+06	5.98026e+06	5.85742e+06	5.98027e+06
PE(39:0e)+Na	PE(39:0e)+Na	PE	(39:0e)	(39:0e)				C44 H90 O7 N1 P1 Na1	798.635	12.3305	0.0249015	6.63275e+06	1.77307e+07	1.95482e+07	5.47664e+06	9.72517e+06	2.2422e+07	1.09748e+07	1.12481e+07	8.6547e+06	8.68192e+06	1.01563e+07	1.06009e+07	1.01566e+07
SM(d41:2)+H	SM(d41:2)+H	SM	(d41:2)	(d41:2)				C46 H92 O6 N2 P1	799.669	12.9788	0.00583284	1.57236e+07	2.1053e+07	1.53399e+07	9.10303e+06	4.15294e+07	1.08104e+07	8.92849e+06	1.2828e+07	8.78782e+06	5.40865e+06	1.20881e+07	1.19689e+07	1.19648e+07
CerG1(d40:2)+NH4	CerG1(d40:2)+NH4	CerG1	(d40:2)	(d40:2)				C46 H91 O8 N2	799.677	20.2116	0.00244888	2.27475e+07	2.76533e+06	889405	1.17439e+08	2.24953e+07	1.82941e+08	127133479	1.69642e+08	1.73253e+08	1.24872e+08	1.23064e+08	1.23587e+08	123587690
PE(40:6e)+Na	PE(40:6e)+Na	PE	(40:6e)	(40:6e)				C45 H80 O7 N1 P1 Na1	800.556	12.1036	0.00751606	1.61493e+07	1.98739e+07	1.72197e+07	8.63678e+06	1.52461e+07	2.07396e+07	14791925	1.29483e+07	1.43851e+07	8.57761e+06	1.43306e+07	1.45184e+07	1.45191e+07
PC(37:2)+H	PC(37:2)+H	PC	(37:2)	(37:2)				C45 H87 O8 N1 P1	800.616	12.0274	0.0209126	1.45548e+07	1.6817e+07	2.65172e+07	1.10832e+07	2.31338e+07	3.08988e+07	2.02537e+07	1.96872e+07	2.03337e+07	1.20572e+07	1.88276e+07	1.81626e+07	1.81608e+07
PE(40:2)+H	PE(40:2)+H	PE	(40:2)	(40:2)				C45 H87 O8 N1 P1	800.616	13.8119	0.0186923	2.08451e+06	2.69179e+06	3.95591e+06	367056	4.60835e+06	4.59385e+06	2.94703e+06	2.52655e+06	2.77786e+06	1.45441e+06	2.80653e+06	2.89837e+06	2.8065e+06
SM(d41:1)+H	SM(d41:1)+H	SM	(d41:1)	(d41:1)				C46 H94 O6 N2 P1	801.684	14.1581	0.00267562	4.10246e+07	4.85267e+07	3.64756e+07	3.71482e+07	4.74573e+07	6.50442e+07	6.47202e+07	4.77635e+07	4.07544e+07	2.69668e+07	4.69809e+07	4.71993e+07	4.69815e+07
PE(40:5e)+Na	PE(40:5e)+Na	PE	(40:5e)	(40:5e)				C45 H82 O7 N1 P1 Na1	802.572	13.0448	0.00301319	2.29152e+07	1.88115e+07	2.18779e+07	1.71453e+07	2.18491e+07	1.53072e+07	1.90825e+07	1.47418e+07	1.22197e+07	8.30592e+06	16205225	1.62053e+07	1.61208e+07
PC(37:1)+H	PC(37:1)+H	PC	(37:1)	(37:1)				C45 H89 O8 N1 P1	802.632	12.9374	0.00207199	1.5146e+07	1.61139e+07	1.62161e+07	1.18326e+07	2.47779e+07	1.47661e+07	1.02408e+07	1.83078e+07	1.14115e+07	5.41798e+06	1.30685e+07	1.31224e+07	13101010
PE(40:1)+H	PE(40:1)+H	PE	(40:1)	(40:1)				C45 H89 O8 N1 P1	802.632	14.994	0.00903439	2.34817e+06	2.63145e+06	3.39315e+06	1.8356e+06	4.34647e+06	2.68419e+06	2.09477e+06	2.48436e+06	1.3548e+06	1.08121e+06	2.35699e+06	2.39428e+06	2.39425e+06
PE(16:0p/20:5)-H	PE(36:5p)-H	PE	(16:0p/20:5)	(16:0p)	(20:5)			C41 H71 O7 N1 P1	720.497	10.4386	0.0081609	5.80391e+06	7.69391e+06	6.88881e+06	2.91393e+06	5.93515e+06	5.65847e+06	6.01201e+06	5.89464e+06	5.35565e+06	3.1107e+06	5.05523e+06	5.12706e+06	5.12766e+06
PC(16:0/20:4)+Na	PC(36:4)+Na	PC	(16:0/20:4)	(16:0)	(20:4)			C44 H80 O8 N1 P1 Na1	804.551	10.5935	0.00548395	3.26428e+08	3.48487e+08	3.09515e+08	2.24125e+08	2.88247e+08	5.20133e+08	3.98201e+08	3.48994e+08	3.55416e+08	2.74829e+08	352065271	3.48745e+08	3.4874e+08
TG(11:0/18:1/18:2)+NH4	TG(47:3)+NH4	TG	(11:0/18:1/18:2)	(11:0)	(18:1)	(18:2)		C50 H94 O6 N1	804.708	18.4496	0.0096359	81597.9			1.18111e+07	275453	4.2499e+06	2.65444e+06	1.34351e+06	5.1107e+06	2.88646e+06	3.60193e+06	3.54047e+06	3.59834e+06
SM(d42:6)+H	SM(d42:6)+H	SM	(d42:6)	(d42:6)				C47 H86 O6 N2 P1	805.622	11.6591	0.0758328	5.4515e+06	6.82988e+06	7.97892e+06	4.23428e+06	5.47427e+06	1.07949e+07	9.64066e+06	5.91054e+06	8.12489e+06	4.97113e+06	4.98496e+06	4.36937e+06	5.01086e+06
PC(38:6)+H	PC(38:6)+H	PC	(18:2/20:4)	(18:2)	(20:4)			C46 H81 O8 N1 P1	806.569	9.8343	0.00227732	4.3481e+07	4.58256e+07	4.89171e+07	3.50347e+07	4.95226e+07	9.5443e+07	6.96896e+07	4.06884e+07	4.46893e+07	3.1374e+07	5.20711e+07	5.18662e+07	5.18662e+07
PC(38:6)+H	PC(38:6)+H	PC	(38:6)	(38:6)				C46 H81 O8 N1 P1	806.569	10.29	0.000732953	1.77559e+07	1.70162e+07	1.28191e+07	1.19445e+07	1.66272e+07	9.50936e+07	5.79942e+07	3.18862e+07	3.59814e+07	3.2344e+07	3.35869e+07	3.35848e+07	3.36285e+07
PC(38:6)+H	PC(38:6)+H	PC	(38:6)	(38:6)				C46 H81 O8 N1 P1	806.569	10.8473	0.00571827	1.17905e+08	1.16119e+08	1.35533e+08	1.16736e+08	1.61243e+08	3.0854e+08	2.43985e+08	1.49105e+08	1.72548e+08	1.43575e+08	1.73796e+08	1.7553e+08	1.75527e+08
PE(20:0p/22:5)+H	PE(42:5p)+H	PE	(20:0p/22:5)	(20:0p)	(22:5)			C47 H85 O7 N1 P1	806.606	13.3444	0.0062443	2.81854e+06	2.80745e+06	2.28308e+06	2.00417e+06	2.28272e+06	1.99224e+06	3.48881e+06	1.74999e+06	1.5481e+06	1.15898e+06	2.12463e+06	2.12086e+06	2.1001e+06
TG(15:0/14:0/18:2)+NH4	TG(47:2)+NH4	TG	(15:0/14:0/18:2)	(15:0)	(14:0)	(18:2)		C50 H96 O6 N1	806.723	19.6518	0.0131509	689639	99965.6	80237.8	3.31685e+07	1.04123e+06	5.42375e+07	1.8852e+07	9.40982e+06	4.01515e+07	1.63631e+07	1.68987e+07	1.6517e+07	1.68993e+07
SM(d40:2)+Na	SM(d40:2)+Na	SM	(d40:2)	(d40:2)				C45 H89 O6 N2 P1 Na1	807.635	12.4983	0.00950871	6.19688e+07	6.39252e+07	6.52407e+07	3.74193e+07	7.54377e+07	4.68291e+07	3.64588e+07	5.11254e+07	2.97753e+07	1.8542e+07	4.53444e+07	4.46041e+07	4.53494e+07
PC(38:5)+H	PC(38:5)+H	PC	(18:1/20:4)	(18:1)	(20:4)			C46 H83 O8 N1 P1	808.585	10.6741	0.000593247	1363201763	1581620212	1560278666	9.33114e+08	1366301474	2302123660	2030306293	1629982101	1636088411	1103113435	1566306807	1564697067	1566305091
PE(16:0p/20:5)-H	PE(36:5p)-H	PE	(16:0p/20:5)	(16:0p)	(20:5)			C41 H71 O7 N1 P1	720.497	10.6919	0.00284815	1.02844e+07	9.66628e+06	8.32756e+06	4.54825e+06	1.19118e+07	3.23675e+07	2.19293e+07	1.8414e+07	1.28892e+07	1.12604e+07	1.05972e+07	1.06075e+07	1.0654e+07
PC(36:2)+Na	PC(36:2)+Na	PC	(36:2)	(36:2)				C44 H84 O8 N1 P1 Na1	808.583	12.3156	0.0177786	9.40313e+06	9.29069e+06	1.10759e+07	1.15774e+07	1.23264e+07	6.49817e+07	1.90268e+07	1.41774e+07	1.14759e+07	7.98448e+06	1.30591e+07	1.30596e+07	1.34657e+07
TG(15:0/14:0/18:1)+NH4	TG(47:1)+NH4	TG	(15:0/14:0/18:1)	(15:0)	(14:0)	(18:1)		C50 H98 O6 N1	808.739	20.6027	0.00760115	1.35309e+06	235848	125735	3.42128e+07	1.89566e+06	1.01821e+08	6.28961e+07	3.4019e+07	111565749	6.93665e+07	4.28716e+07	4.287e+07	4.23088e+07
SM(d42:4)+H	SM(d42:4)+H	SM	(d42:4)	(d42:4)				C47 H90 O6 N2 P1	809.653	13.5857	0.00775264	1.68387e+08	165265533	1.49419e+08	1.37595e+08	1.86875e+08	3.55759e+08	2.53371e+08	2.22988e+08	1.43978e+08	8.71691e+07	1.82466e+08	182470368	180029142
PC(18:0/20:4)+H	PC(38:4)+H	PC	(18:0/20:4)	(18:0)	(20:4)			C46 H85 O8 N1 P1	810.601	11.3049	0.00659191	2.28774e+08	2.48502e+08	227505137	1.27844e+08	2.50557e+08	3.00326e+08	2.97495e+08	2.09489e+08	1.87563e+08	1.53413e+08	2.19636e+08	2.1964e+08	2.1714e+08
PC(38:4)+H	PC(38:4)+H	PC	(18:0/20:4)	(18:0)	(20:4)			C46 H85 O8 N1 P1	810.601	11.5768	0.0027518	4232098934	4703386064	4388590805	2832053233	3524146576	3719417696	3458489333	2964942429	2832821604	1794448780	3385175315	3369133636	3369050311
PC(36:1)+Na	PC(36:1)+Na	PC	(36:1)	(36:1)				C44 H86 O8 N1 P1 Na1	810.598	12.7809	0.0374916	6.59327e+07	6.82529e+07	9.14639e+07	3.24171e+07	8.61756e+07	6.23e+07	3.55437e+07	6.23358e+07	3.3835e+07	1.65907e+07	4.967e+07	4.65976e+07	4.65595e+07
PC(18:0/20:4)+H	PC(38:4)+H	PC	(18:0/20:4)	(18:0)	(20:4)			C46 H85 O8 N1 P1	810.601	11.068	0.020993	7.37949e+07	6.58949e+07	6.58251e+07	5.91938e+07	9.26652e+07	5.18681e+08	3.17849e+08	1.33213e+08	1.81641e+08	228160455	165170583	1.71329e+08	1.71323e+08
PC(38:4)+H	PC(38:4)+H	PC	(38:4)	(38:4)				C46 H85 O8 N1 P1	810.601	10.031	0.00383424	1.54686e+06	1.83891e+06	1.62947e+06	1.01963e+06	1.3635e+06	1.57437e+06	837576	966308	826890	590048	1.14924e+06	1.14923e+06	1.14162e+06
CerG1(d18:1/24:1)+H	CerG1(d42:2)+H	CerG1	(d18:1/24:1)	(d18:1)	(24:1)			C48 H92 O8 N1	810.682	13.8894	0.01007	1.55349e+06	1.43308e+06	1.58251e+06	761383	2.01818e+06	5.58005e+06	4.69661e+06	3.89766e+06	2.64418e+06	2.4777e+06	2.74656e+06	2.6989e+06	2.7465e+06
TG(15:0/16:0/16:0)+NH4	TG(47:0)+NH4	TG	(15:0/16:0/16:0)	(15:0)	(16:0)	(16:0)		C50 H100 O6 N1	810.755	21.6866	0.0118546	2.64973e+06	897456	416786	3.2585e+07	2.46491e+06	7.40427e+07	7.86951e+07	50527169	9.49285e+07	7.79533e+07	5.2003e+07	5.2004e+07	5.0943e+07
Cer(d18:1/26:1)+HCOO	Cer(d44:2)+HCOO	Cer	(d18:1/26:1)	(d18:1)	(26:1)			C45 H86 O5 N1	720.651	16.324	0.0114347	955882	1.39896e+06	740241	1.46293e+06	843735	2.40889e+06	2.15259e+06	1.86481e+06	2.12245e+06	1.52417e+06	1.64026e+06	1.67317e+06	1.6732e+06
SM(d42:3)+H	SM(d42:3)+H	SM	(d42:3)	(d42:3)				C47 H92 O6 N2 P1	811.669	12.5716	0.00229765	5.92741e+08	7.11078e+08	7.10563e+08	3.44836e+08	630274859	5.92918e+08	354517496	5.35631e+08	3.72631e+08	2.36117e+08	4.87503e+08	4.8557e+08	4.85566e+08
PS(18:0/18:1)+Na	PS(36:1)+Na	PS	(18:0/18:1)	(18:0)	(18:1)			C42 H80 O10 N1 P1 Na1	812.541	10.7151	0.00164352	2.90035e+08	3.93125e+08	2.97263e+08	2.019e+08	2.9833e+08	339832838	326329396	323703746	289356422	2.03627e+08	2.56656e+08	255927562	2.55926e+08
PC(38:3)+H	PC(38:3)+H	PC	(18:0/20:3)	(18:0)	(20:3)			C46 H87 O8 N1 P1	812.616	11.9754	0.0101524	3.73647e+08	407602252	3.89666e+08	3.08039e+08	5.19657e+08	9.47811e+08	7.17429e+08	4.41707e+08	4.15279e+08	3.60663e+08	468286400	4.61622e+08	4.70794e+08
PC(38:3)+H	PC(38:3)+H	PC	(18:0/20:3)	(18:0)	(20:3)			C46 H87 O8 N1 P1	812.616	12.2952	0.0309073	1.95871e+08	1.63812e+08	1.62794e+08	7.28343e+07	200487947	1.82182e+08	1.35807e+08	1.869e+08	1.22699e+08	8.97921e+07	1.30765e+08	130862209	1.37943e+08
CerG1(d18:1/24:0)+H	CerG1(d42:1)+H	CerG1	(d18:1/24:0)	(d18:1)	(24:0)			C48 H94 O8 N1	812.697	15.145	0.00422923	1.79135e+06	1.99277e+06	2.05579e+06	1.29802e+06	3.07277e+06	5.55547e+06	6.0183e+06	5.50349e+06	2.87813e+06	2.77282e+06	3.36211e+06	3.3625e+06	3.33774e+06
SM(d42:2)+H	SM(d42:2)+H	SM	(d42:2)	(d42:2)				C47 H94 O6 N2 P1	813.684	13.5054	0.000876553	9.95889e+08	1153114671	1000383365	6.41824e+08	9.79919e+08	2074961276	1287701627	1383128316	1113467969	6.77114e+08	1117316533	1117308893	1115617242
SM(d42:2)+H	SM(d42:2)+H	SM	(d42:2)	(d42:2)				C47 H94 O6 N2 P1	813.684	12.9861	0.00539787	6.81612e+06	8.33233e+06	1.7418e+07	5.23613e+06	5.10759e+06	1.80169e+07	1.3725e+07	8.31516e+06	1.48239e+07	8.36203e+06	9.60415e+06	9.60427e+06	9.5147e+06
PC(38:6e)+Na	PC(38:6e)+Na	PC	(38:6e)	(38:6e)				C46 H82 O7 N1 P1 Na1	814.572	11.0997	0.00152413	9.32275e+07	1.11728e+08	1.05111e+08	5.8242e+07	9.41817e+07	9.42172e+07	6.34613e+07	8.21524e+07	5.8994e+07	4.06308e+07	7.96657e+07	7.94559e+07	7.94556e+07
TG(12:0/18:2/18:3)+NH4	TG(48:5)+NH4	TG	(12:0/18:2/18:3)	(12:0)	(18:2)	(18:3)		C51 H92 O6 N1	814.692	16.9616	0.0170686	597636	13632.5		1.9127e+07	1.25751e+06	4.90427e+06	1.80418e+06	1.3212e+06	3.48939e+06	1.72093e+06	4.81526e+06	4.67698e+06	4.67437e+06
PE(16:0p/20:4)-H	PE(36:4p)-H	PE	(16:0p/20:4)	(16:0p)	(20:4)			C41 H73 O7 N1 P1	722.513	11.3654	0.00247604	4.1264e+08	4.00561e+08	4.07077e+08	2.72621e+08	4.33686e+08	3.90806e+08	4.49509e+08	3.79048e+08	2.94432e+08	2.35663e+08	3.42509e+08	3.41043e+08	3.42511e+08
TG(10:0/18:1/20:4)+NH4	TG(48:5)+NH4	TG	(10:0/18:1/20:4)	(10:0)	(18:1)	(20:4)		C51 H92 O6 N1	814.692	17.4262	0.0023894	371857	12874.9		6.62806e+06	645632	5.98924e+06	3.16454e+06	2.00248e+06	6.58427e+06	2.30933e+06	3.49258e+06	3.50703e+06	3.49253e+06
SM(d42:1)+H	SM(d42:1)+H	SM	(d42:1)	(d42:1)				C47 H96 O6 N2 P1	815.7	13.9316	0.00866174	1.47369e+07	2.24587e+07	1.9859e+07	1.46885e+07	1.70356e+07	4.36247e+07	2.71852e+07	7.13936e+06	3.01548e+07	1.51933e+07	2.16253e+07	2.13027e+07	2.16258e+07
SM(d42:1)+H	SM(d42:1)+H	SM	(d42:1)	(d42:1)				C47 H96 O6 N2 P1	815.7	14.7436	0.00178127	5.53111e+08	4.6918e+08	3.88227e+08	4.30386e+08	4.98594e+08	8.13536e+08	6.38328e+08	5.40622e+08	3.64437e+08	3.11653e+08	5.11945e+08	513529771	5.11952e+08
PC(38:4p)+Na	PC(38:4p)+Na	PC	(38:4p)	(38:4p)				C46 H84 O7 N1 P1 Na1	816.588	11.2427	0.00663418	122476822	1.36876e+08	1.32102e+08	8.86975e+07	1.30099e+08	2.90146e+08	2.04602e+08	1.71871e+08	1.57162e+08	1.41593e+08	1.53532e+08	1.53516e+08	1.51767e+08
PC(38:1)+H	PC(38:1)+H	PC	(38:1)	(38:1)				C46 H91 O8 N1 P1	816.648	13.4632	0.00886592	2.65978e+07	2.75849e+07	3.35831e+07	2.02855e+07	3.67365e+07	46255244	3.10181e+07	3.19592e+07	2.45807e+07	1.73781e+07	2.9066e+07	2.9524e+07	2.95095e+07
TG(12:0/18:2/18:2)+NH4	TG(48:4)+NH4	TG	(12:0/18:2/18:2)	(12:0)	(18:2)	(18:2)		C51 H94 O6 N1	816.708	17.9645	0.00160421	5.25245e+06	366687	38754.8	2.16599e+08	7.39221e+06	4.92814e+07	2.63357e+07	1.49477e+07	5.12997e+07	1.85924e+07	4.67941e+07	46794128	4.66642e+07
TG(18:0/10:0/20:4)+NH4	TG(48:4)+NH4	TG	(18:0/10:0/20:4)	(18:0)	(10:0)	(20:4)		C51 H94 O6 N1	816.708	18.719	0.00429918	541800			1.13036e+07	747507	7.55302e+06	6.1312e+06	3.91015e+06	1.12792e+07	4.60228e+06	5.20041e+06	5.20088e+06	5.16202e+06
TG(16:0/14:2/18:2)+NH4	TG(48:4)+NH4	TG	(16:0/14:2/18:2)	(16:0)	(14:2)	(18:2)		C51 H94 O6 N1	816.708	18.4305	0.0769802	260282			2.56509e+07	294367	4.66755e+06	4.92724e+06	2.22955e+06	6.28958e+06	3.41177e+06	6.95513e+06	6.08859e+06	6.11913e+06
SM(d42:0)+H	SM(d42:0)+H	SM	(d42:0)	(d42:0)				C47 H98 O6 N2 P1	817.716	15.2022	0.00342303	4.74278e+06	5.05698e+06	4.56825e+06	4.68937e+06	4.50454e+06	9.14951e+06	7.2096e+06	5.96453e+06	5.48421e+06	3.97568e+06	5.52941e+06	5.49675e+06	5.49675e+06
PE(40:4)+Na	PE(40:4)+Na	PE	(40:4)	(40:4)				C45 H82 O8 N1 P1 Na1	818.567	12.5275	0.0162451	2.08522e+07	2.37874e+07	2.12125e+07	1.15442e+07	1.92671e+07	1.31144e+07	1.28926e+07	1.13856e+07	1.28808e+07	6.75466e+06	1.48731e+07	1.52929e+07	1.48681e+07
PE(36:3p)-H	PE(36:3p)-H	PE	(36:3p)	(36:3p)				C41 H75 O7 N1 P1	724.529	11.628	0.0556151	5.67594e+06	8.58504e+06	9.80211e+06	8.85308e+06	1.17773e+07	1.12555e+07	9.7026e+06	9.94517e+06	7.24811e+06	5.37194e+06	1.08918e+07	1.19554e+07	1.08556e+07
PC(39:7)+H	PC(39:7)+H	PC	(39:7)	(39:7)				C47 H81 O8 N1 P1	818.569	11.0978	0.0307578	1.33736e+07	1.42917e+07	9.17006e+06	7.1558e+06	1.36828e+07	1.25255e+07	1.4908e+07	1.10396e+07	9.50188e+06	1.00837e+07	1.21066e+07	1.20817e+07	1.27497e+07
PC(40:6p)+H	PC(40:6p)+H	PC	(40:6p)	(40:6p)				C48 H85 O7 N1 P1	818.606	11.6797	0.0170376	2.17789e+07	2.06469e+07	2.18612e+07	1.47404e+07	2.20723e+07	3.98073e+07	2.29921e+07	2.58198e+07	2.44232e+07	2.21483e+07	2.24038e+07	2.24838e+07	2.3109e+07
PC(38:4e)+Na	PC(38:4e)+Na	PC	(38:4e)	(38:4e)				C46 H86 O7 N1 P1 Na1	818.603	12.1616	0.00842564	2.29564e+07	1.77684e+07	1.87846e+07	1.82291e+07	2.224e+07	3.98253e+07	3.21898e+07	2.52429e+07	2.00413e+07	1.49563e+07	2.34033e+07	2.37466e+07	2.34034e+07
PC(40:6p)+H	PC(40:6p)+H	PC	(40:6p)	(40:6p)				C48 H85 O7 N1 P1	818.606	10.9443	0.000546247	1.47669e+07	1.60739e+07	1.35941e+07	1.13974e+07	1.45186e+07	1.54407e+08	5.25225e+07	3.52586e+07	3.75599e+07	3.62832e+07	3.52332e+07	3.5233e+07	3.51998e+07
TG(18:1/12:0/18:2)+NH4	TG(48:3)+NH4	TG	(18:1/12:0/18:2)	(18:1)	(12:0)	(18:2)		C51 H96 O6 N1	818.723	19.0789	0.00538578	1.45409e+07	1.33007e+06	242719	7.80982e+08	2.36312e+07	5.51279e+08	2.59937e+08	1.39888e+08	602587236	239618294	2.69003e+08	2.69001e+08	2.665e+08
TG(16:0/14:0/18:3)+NH4	TG(48:3)+NH4	TG	(16:0/14:0/18:3)	(16:0)	(14:0)	(18:3)		C51 H96 O6 N1	818.723	19.3624	0.00435921	5.32322e+06	233312	145226	1.80948e+08	6.37307e+06	1.52762e+08	1.00956e+08	4.71559e+07	2.06241e+08	1.04676e+08	9.85355e+07	9.76915e+07	9.79945e+07
SM(d43:6)+H	SM(d43:6)+H	SM	(d43:6)	(d43:6)				C48 H88 O6 N2 P1	819.637	12.084	0.0887573	1.56748e+06	2.35707e+06	1.37376e+06	2.04272e+06	4.81616e+06	680300	524135	2.39847e+06	2.30659e+06	474703	2.3237e+06	1.9796e+06	2.02389e+06
CerG1(d42:6)+NH4	CerG1(d42:6)+NH4	CerG1	(d42:6)	(d42:6)				C48 H87 O8 N2	819.646	17.4238	0.00377756	1.08733e+06			9.66633e+06	1.89696e+06	11110376	6.22988e+06	4.76005e+06	1.32394e+07	4.75737e+06	6.80422e+06	6.80421e+06	6.7598e+06
PC(40:6e)+H	PC(40:6e)+H	PC	(40:6e)	(40:6e)				C48 H87 O7 N1 P1	820.621	11.623	0.00611056	2.70722e+07	3.48008e+07	3.31289e+07	1.75572e+07	2.74722e+07	2.99293e+07	1.24846e+07	2.73883e+07	2.42933e+07	37024002	2.83281e+07	2.80306e+07	2.80301e+07
PC(40:6e)+H	PC(40:6e)+H	PC	(40:6e)	(40:6e)				C48 H87 O7 N1 P1	820.621	11.2602	0.0157119	2.35998e+07	2.72863e+07	2.72701e+07	2.08607e+07	3.04674e+07	8.70819e+07	3.54886e+07	2.27265e+07	2.53976e+07	3.50732e+07	3.21928e+07	3.30833e+07	3.30868e+07
PE(36:3p)-H	PE(36:3p)-H	PE	(36:3p)	(36:3p)				C41 H75 O7 N1 P1	724.529	12.094	0.00991645	7.87163e+06	5.36943e+06	5.75794e+06	2.82322e+06	1.00755e+07	5.97304e+06	3.22789e+06	9.98097e+06	4.49776e+06	3.67424e+06	4.94961e+06	4.86526e+06	4.94999e+06
TG(16:0/14:0/18:2)+NH4	TG(48:2)+NH4	TG	(16:0/14:0/18:2)	(16:0)	(14:0)	(18:2)		C51 H98 O6 N1	820.739	20.3342	0.00749556	8.90489e+07	6.83806e+06	2.05642e+06	2623551963	1.1312e+08	3721219532	1745238554	1231029520	3031275954	2485441464	1576281738	1576279681	1555904519
SM(d43:5)+H	SM(d43:5)+H	SM	(d43:5)	(d43:5)				C48 H90 O6 N2 P1	821.653	12.9906	0.133991	8.07568e+06	1.03475e+07	6.69517e+06	3.82522e+06	9.14644e+06	8.76282e+06	6.27005e+06	8.14346e+06	6.12646e+06	2.32341e+06	6.31344e+06	7.89545e+06	6.30379e+06
CerG1(d42:5)+NH4	CerG1(d42:5)+NH4	CerG1	(d42:5)	(d42:5)				C48 H89 O8 N2	821.661	18.6959	0.0140652	1.46831e+06	23950.5		1.19097e+07	1.72115e+06	1.12949e+07	1.05603e+07	8.21092e+06	1.74162e+07	9.34885e+06	8.71832e+06	8.50768e+06	8.71841e+06
PC(39:5)+H	PC(39:5)+H	PC	(39:5)	(39:5)				C47 H85 O8 N1 P1	822.601	11.1127	0.00360189	9.0566e+06	9.93617e+06	7.45664e+06	5.08012e+06	1.0658e+07	1.19191e+07	6.77331e+06	9.25342e+06	7.67549e+06	3.1766e+06	7.93631e+06	7.98605e+06	7.93655e+06
PC(40:5e)+H	PC(40:5e)+H	PC	(40:5e)	(40:5e)				C48 H89 O7 N1 P1	822.637	11.9096	0.0072208	4.47705e+07	5.14794e+07	4.91129e+07	2.63574e+07	4.62201e+07	2.19742e+08	7.35619e+07	4.85489e+07	6.26075e+07	6.6142e+07	6.31192e+07	6.31226e+07	6.39136e+07
PC(40:5e)+H	PC(40:5e)+H	PC	(40:5e)	(40:5e)				C48 H89 O7 N1 P1	822.637	12.167	0.0185006	1.00722e+07	1.17965e+07	1.12079e+07	6.96515e+06	1.06655e+07	3.8659e+07	1.74974e+07	1.1682e+07	1.29828e+07	1.20199e+07	1.45357e+07	1.4075e+07	1.4536e+07
PC(40:5e)+H	PC(40:5e)+H	PC	(40:5e)	(40:5e)				C48 H89 O7 N1 P1	822.637	12.5355	0.00131473	8.46108e+06	8.8435e+06	9.43833e+06	7.59676e+06	8.28145e+06	8.3919e+06	6.92634e+06	5.6154e+06	4.81122e+06	3.25739e+06	7.14238e+06	7.16069e+06	7155269
TG(16:0/14:0/18:1)+NH4	TG(48:1)+NH4	TG	(16:0/14:0/18:1)	(16:0)	(14:0)	(18:1)		C51 H100 O6 N1	822.755	21.7226	0.0244922	2.21236e+06	318999	370104	4.52179e+07	2.04508e+06	1.19806e+08	6.71306e+07	6.88088e+07	2.04546e+07	4.16928e+07	4.3457e+07	4.34846e+07	4.53412e+07
SM(d41:1)+Na	SM(d41:1)+Na	SM	(d41:1)	(d41:1)				C46 H93 O6 N2 P1 Na1	823.666	14.1581	0.0122918	7.31539e+06	9.01895e+06	6.71018e+06	6.61968e+06	9.46292e+06	1.27318e+07	1.23408e+07	8.96572e+06	7.10433e+06	4.74834e+06	8.77789e+06	8.77774e+06	8.59225e+06
PE(36:2p)-H	PE(36:2p)-H	PE	(36:2p)	(36:2p)				C41 H77 O7 N1 P1	726.544	12.4042	0.0232896	2.34655e+07	2.94515e+07	3.65314e+07	1.78344e+07	3.98839e+07	3.25916e+07	3.27788e+07	5.41371e+07	2.81893e+07	1.83127e+07	3.25354e+07	3.2515e+07	3.3855e+07
PC(39:4)+H	PC(39:4)+H	PC	(39:4)	(39:4)				C47 H87 O8 N1 P1	824.616	12.0364	0.00727745	9.23403e+06	1.37447e+07	9.18172e+06	5.79614e+06	9.50736e+06	5.92509e+06	6.832e+06	5.20646e+06	5.52197e+06	4.53335e+06	7.56665e+06	7.47143e+06	7.56616e+06
PC(39:4)+H	PC(39:4)+H	PC	(39:4)	(39:4)				C47 H87 O8 N1 P1	824.616	11.7602	0.0397453	7.07993e+06	8.06844e+06	6.94757e+06	7.3109e+06	6.63413e+06	7.27855e+06	8.39566e+06	7.13281e+06	8.73187e+06	7.71846e+06	6.98579e+06	6.98032e+06	7.47504e+06
PC(40:3p)+H	PC(40:3p)+H	PC	(40:3p)	(40:3p)				C48 H91 O7 N1 P1	824.653	12.4703	0.061248	4.20909e+06	4.3423e+06	3.70154e+06	5.51417e+06	4.18988e+06	1.04693e+07	1.2477e+07	5.64247e+06	4.65898e+06	4.25515e+06	5.91585e+06	5.92671e+06	6.57239e+06
TG(16:0/16:0/16:0)+NH4	TG(48:0)+NH4	TG	(16:0/16:0/16:0)	(16:0)	(16:0)	(16:0)		C51 H102 O6 N1	824.77	22.2819	0.0107524	1.48663e+08	2.16491e+07	8.1854e+06	4.29784e+08	1.10256e+08	3.91782e+08	5.23872e+08	563437573	438410963	5.08998e+08	4.68792e+08	4.60193e+08	460144166
SM(d43:3)+H	SM(d43:3)+H	SM	(d43:3)	(d43:3)				C48 H94 O6 N2 P1	825.684	13.0677	0.00808618	6.10117e+06	8.09194e+06	6.4079e+06	3.52719e+06	7.11782e+06	4.5027e+06	3.15155e+06	5.88805e+06	4.07943e+06	1.74171e+06	4.76935e+06	4.69315e+06	4725552
PC(18:2/20:4)+Na	PC(38:6)+Na	PC	(18:2/20:4)	(18:2)	(20:4)			C46 H80 O8 N1 P1 Na1	828.551	9.8343	0.00745395	4.93801e+06	5.59198e+06	6.53198e+06	3.80556e+06	6.88734e+06	1.29166e+07	8.86533e+06	4.7633e+06	5.72579e+06	3.28316e+06	5.84915e+06	5.77412e+06	5.77444e+06
PC(38:6)+Na	PC(38:6)+Na	PC	(38:6)	(38:6)				C46 H80 O8 N1 P1 Na1	828.551	10.29	0.0248861	3.66131e+06	2.49405e+06	1.47197e+06	2.57647e+06	2.30963e+06	1.65122e+07	8.60717e+06	3.90058e+06	4.73573e+06	4.06468e+06	4.66626e+06	4.66697e+06	4.46832e+06
CerG1(d18:1/24:0+O)+H	CerG1(d42:1+O)+H	CerG1	(d18:1/24:0+O)	(d18:1)	(24:0+O)			C48 H94 O9 N1	828.692	14.8265	0.0129726	243452	283350	661462	112816	217038	133801	3.86169e+06	8.10147e+06	1.78031e+06	347560	2.14587e+06	2.19432e+06	2.14562e+06
SM(d43:1)+H	SM(d43:1)+H	SM	(d43:1)	(d43:1)				C48 H98 O6 N2 P1	829.716	15.3494	0.00373563	6.24033e+06	7.5202e+06	5.0031e+06	6.13082e+06	7.21729e+06	7.67884e+06	7.4394e+06	6.68307e+06	4.42608e+06	3.5779e+06	6.26357e+06	6.22302e+06	6.26336e+06
PC(38:5)+Na	PC(38:5)+Na	PC	(38:5)	(38:5)				C46 H82 O8 N1 P1 Na1	830.567	10.9451	0.00849951	2.55289e+07	2.68374e+07	2.6025e+07	1.49709e+07	2.22552e+07	3.46258e+07	3.8774e+07	2.69608e+07	3.09247e+07	1.92097e+07	2.78614e+07	2.76419e+07	2.81153e+07
PE(36:1p)-H	PE(36:1p)-H	PE	(36:1p)	(36:1p)				C41 H79 O7 N1 P1	728.56	13.3894	0.000788443	2.04867e+07	1.79463e+07	2.34915e+07	2.19046e+07	2.99197e+07	2.27564e+07	2.63023e+07	3.82752e+07	1.72575e+07	1.2645e+07	2.09426e+07	2.09711e+07	2.09424e+07
PC(40:8)+H	PC(40:8)+H	PC	(40:8)	(40:8)				C48 H81 O8 N1 P1	830.569	9.5823	0.0111944	4.01002e+06	4.95884e+06	3.85604e+06	2.83982e+06	4.13167e+06	1.56354e+07	1.0018e+07	5.33518e+06	7.08174e+06	3.40111e+06	6.05355e+06	6.19033e+06	6115118
PC(40:8)+H	PC(40:8)+H	PC	(40:8)	(40:8)				C48 H81 O8 N1 P1	830.569	10.675	0.00499883	2.92346e+08	3.27007e+08	3.27194e+08	2.03928e+08	2.90244e+08	6.62628e+08	4.63757e+08	4.10468e+08	4.1922e+08	2.81288e+08	3.67319e+08	3.67341e+08	370519635
PE(42:1)+H	PE(42:1)+H	PE	(42:1)	(42:1)				C47 H93 O8 N1 P1	830.663	16.215	0.00450728	1.52132e+06	1.63441e+06	1.9392e+06	1.26757e+06	2.58351e+06	989513	1.3286e+06	1.3406e+06	510505	851802	1.45388e+06	1.46529e+06	1.45394e+06
SM(d44:7)+H	SM(d44:7)+H	SM	(d44:7)	(d44:7)				C49 H88 O6 N2 P1	831.637	11.7355	0.00942301	1.32808e+07	1.51059e+07	1.27195e+07	9.02797e+06	1.1446e+07	6.78248e+06	1.95007e+07	1.08567e+07	1.12466e+07	7.60216e+06	1.06104e+07	1.07825e+07	1.07884e+07
SM(d42:1+pO)+H	SM(d42:1+pO)+H	SM	(d42:1+pO)	(d42:1+pO)				C47 H96 O7 N2 P1	831.695	12.9482	0.00780863	3.24978e+06	3.80573e+06	3.24572e+06	2.24544e+06	3.54373e+06	5.64025e+06	3.51121e+06	3.40034e+06	3.06022e+06	2.0097e+06	3.19316e+06	3.23683e+06	3.23665e+06
PC(38:4)+Na	PC(38:4)+Na	PC	(18:0/20:4)	(18:0)	(20:4)			C46 H84 O8 N1 P1 Na1	832.583	11.3049	0.00530935	4.34603e+07	4.65353e+07	4.20289e+07	2.75581e+07	4.67716e+07	4.68604e+07	5.20907e+07	3.77249e+07	3.75048e+07	3.0067e+07	4.09264e+07	4.05329e+07	4.08861e+07
PC(40:7)+H	PC(40:7)+H	PC	(40:7)	(40:7)				C48 H83 O8 N1 P1	832.585	11.092	0.00509716	1.65195e+07	1.41917e+07	1.70331e+07	1.29508e+07	2.10362e+07	9.79482e+07	7.13657e+07	2.67241e+07	3.25866e+07	7.53932e+07	3.1795e+07	3.15152e+07	3.17951e+07
TG(15:0/16:1/18:2)+NH4	TG(49:3)+NH4	TG	(15:0/16:1/18:2)	(15:0)	(16:1)	(18:2)		C52 H98 O6 N1	832.739	20.0752	0.0184179	289252			4.85327e+07	1.38082e+06	3.28072e+07	2.58293e+07	9.61009e+06	2.24617e+07	3.13308e+07	2.45225e+07	2.45276e+07	2.37509e+07
SM(d44:6)+H	SM(d44:6)+H	SM	(d44:6)	(d44:6)				C49 H90 O6 N2 P1	833.653	12.5794	0.0105968	1.82433e+08	2.18928e+08	2.05328e+08	1.2439e+08	1.88481e+08	1.99641e+08	1.30339e+08	1.80214e+08	1.43268e+08	8.97662e+07	1.70981e+08	1.70999e+08	167871118
PE(17:0/18:1)-H	PE(35:1)-H	PE	(17:0/18:1)	(17:0)	(18:1)			C40 H77 O8 N1 P1	730.539	12.3235	0.00226235	2.30639e+06	2.7325e+06	2.15592e+06	1.74804e+06	3.69556e+06	2.82832e+06	1.87493e+06	2.92111e+06	2.10908e+06	990606	2.1017e+06	2.10172e+06	2.09348e+06
LPS(18:1)-H	LPS(18:1)-H	LPS	(18:1)	(18:1)				C24 H45 O9 N1 P1	522.284	2.378	0.0388935	427004	262057	303947	526487	416073	1.94267e+06	572905	697160	779914	171648	522405	559401	559101
PC(18:0/22:6)+H	PC(40:6)+H	PC	(18:0/22:6)	(18:0)	(22:6)			C48 H85 O8 N1 P1	834.601	10.7688	0.00937403	1.21898e+08	9.90679e+07	1.43028e+08	9.60378e+07	1.22913e+08	8.54255e+07	8.58112e+07	7.66163e+07	5.72845e+07	3.8593e+07	8.45164e+07	8.31587e+07	8.3159e+07
PC(18:0/20:3)+Na	PC(38:3)+Na	PC	(18:0/20:3)	(18:0)	(20:3)			C46 H86 O8 N1 P1 Na1	834.598	12.2952	0.000950166	4.9768e+07	4.62244e+07	4.23125e+07	2.26777e+07	5.25605e+07	3.25964e+07	2.43992e+07	5.13662e+07	2.83568e+07	2.66153e+07	3.60318e+07	3.59725e+07	3.60318e+07
PC(40:6)+H	PC(40:6)+H	PC	(40:6)	(40:6)				C48 H85 O8 N1 P1	834.601	11.2835	0.00225988	8.09615e+07	7.98975e+07	6.56299e+07	5.10268e+07	6.68457e+07	2.17228e+08	1.48495e+08	9.70791e+07	1.02603e+08	6.25452e+07	9.54405e+07	9.56085e+07	9.51805e+07
TG(15:0/16:0/18:2)+NH4	TG(49:2)+NH4	TG	(15:0/16:0/18:2)	(15:0)	(16:0)	(18:2)		C52 H100 O6 N1	834.755	20.9284	0.00384343	8.00752e+06	806099	306043	4.73861e+08	1.38091e+07	4.18446e+08	3.1867e+08	1.4125e+08	5.65377e+08	382751810	2.36714e+08	2.38301e+08	2.38292e+08
TG(16:0e/16:0/18:2)+NH4	TG(50:2e)+NH4	TG	(16:0e/16:0/18:2)	(16:0e)	(16:0)	(18:2)		C53 H104 O5 N1	834.791	22.6973	0.0097843	833206	215081	136602	2.63231e+07	1.43819e+06	3.08667e+07	2.65177e+07	2.31955e+07	4.06154e+07	1.05572e+07	2.11433e+07	21511473	2.14997e+07
SM(d44:5)+H	SM(d44:5)+H	SM	(d44:5)	(d44:5)				C49 H92 O6 N2 P1	835.669	13.5114	0.00395344	3.76825e+08	4.07581e+08	3.57592e+08	2.37179e+08	3.54672e+08	612029743	4.42308e+08	4.62401e+08	3.96306e+08	247372671	4.06636e+08	4.09418e+08	4.06618e+08
PS(18:0/22:6)+H	PS(40:6)+H	PS	(18:0/22:6)	(18:0)	(22:6)			C46 H79 O10 N1 P1	836.544	10.4488	0.00429361	7.02885e+06	6.95573e+06	6.57565e+06	4.71496e+06	5.5556e+06	1.94606e+07	14782475	1.05965e+07	1.03316e+07	5.98031e+06	7.96336e+06	7.9637e+06	7.90446e+06
PC(40:5)+H	PC(40:5)+H	PC	(40:5)	(40:5)				C48 H87 O8 N1 P1	836.616	11.3662	0.105916	7.51657e+07	4.5223e+07	4.48671e+07	2.54182e+07	4.09915e+07	7.53176e+07	1.5156e+08	6.01889e+07	4.32704e+07	2.53752e+07	7.16963e+07	8.60058e+07	7.22107e+07
PC(40:5)+H	PC(40:5)+H	PC	(40:5)	(40:5)				C48 H87 O8 N1 P1	836.616	11.9299	0.00306701	4.03055e+07	4.70992e+07	4.30142e+07	1.82761e+07	4.81522e+07	5.8241e+07	6.13709e+07	4.44039e+07	4.39327e+07	2.7626e+07	4.21255e+07	4.23458e+07	4.21179e+07
PC(38:2)+Na	PC(38:2)+Na	PC	(38:2)	(38:2)				C46 H88 O8 N1 P1 Na1	836.614	12.5863	0.00861982	2.03758e+07	2.3408e+07	2.93604e+07	2.47947e+07	3.05917e+07	4.17906e+07	2.6537e+07	2.25959e+07	3.88275e+07	1.45092e+07	2.58366e+07	2.54182e+07	2.57521e+07
SM(d33:1)+HCOO	SM(d33:1)+HCOO	SM	(d33:1)	(d33:1)				C39 H78 O8 N2 P1	733.55	9.87927	0.00472216	5.82121e+06	6.79933e+06	5.10616e+06	4.16735e+06	6.1931e+06	6.64074e+06	5.48427e+06	5.60866e+06	5.98053e+06	3.60979e+06	5.39781e+06	5.35391e+06	5.35389e+06
TG(16:0e/16:0/18:1)+NH4	TG(50:1e)+NH4	TG	(16:0e/16:0/18:1)	(16:0e)	(16:0)	(18:1)		C53 H106 O5 N1	836.807	23.2908	0.00387865	1.7897e+06	724308	557603	3.41431e+07	1.77685e+06	4.32352e+07	3.60028e+07	5.07442e+07	6.07467e+07	2.04301e+07	2.81e+07	2.79134e+07	27910716
SM(d42:1)+Na	SM(d42:1)+Na	SM	(d42:1)	(d42:1)				C47 H95 O6 N2 P1 Na1	837.682	14.7436	0.0022064	1.77763e+08	1.47885e+08	1.16281e+08	1.22237e+08	1.61438e+08	2.7444e+08	220253724	1.82651e+08	9.59027e+07	8.27229e+07	1.59387e+08	1.58784e+08	1.58776e+08
SM(d42:1)+Na	SM(d42:1)+Na	SM	(d42:1)	(d42:1)				C47 H95 O6 N2 P1 Na1	837.682	13.9316	0.0800958	4.87714e+06	6.70985e+06	4.09974e+06	3.91332e+06	5.64358e+06	2.75799e+06	8.81323e+06	4.80724e+06	2.81325e+06	4.73717e+06	4.67618e+06	5.38613e+06	5.39579e+06
PS(18:0/22:5)+H	PS(40:5)+H	PS	(18:0/22:5)	(18:0)	(22:5)			C46 H81 O10 N1 P1	838.559	10.724	0.00757465	3.61275e+07	4.64162e+07	4.32601e+07	2.53095e+07	4.72858e+07	4.33934e+07	4.1113e+07	2.92883e+07	3.16175e+07	2.08172e+07	3.30017e+07	3.25763e+07	3.30131e+07
PC(40:4)+H	PC(40:4)+H	PC	(40:4)	(40:4)				C48 H89 O8 N1 P1	838.632	12.5182	0.0299274	2.86142e+07	3.00808e+07	3.18243e+07	2.09076e+07	2.6495e+07	3.6531e+07	3.1413e+07	2.5098e+07	1.91136e+07	1.34849e+07	2.27125e+07	2.39151e+07	2.27213e+07
TG(16:0/16:0/17:0)+NH4	TG(49:0)+NH4	TG	(16:0/16:0/17:0)	(16:0)	(16:0)	(17:0)		C52 H104 O6 N1	838.786	22.5248	0.0505441	1.36077e+07	1.78817e+07	735384	1.41029e+08	1.12063e+07	2.98086e+08	5.29132e+08	2.02344e+08	5.44141e+08	3.70927e+08	3.12623e+08	286831798	2.86697e+08
SM(d44:3)+H	SM(d44:3)+H	SM	(d44:3)	(d44:3)				C49 H96 O6 N2 P1	839.7	13.5972	0.00894298	1.89889e+07	2.54569e+07	1.8787e+07	1.25047e+07	1.71597e+07	2.37794e+07	1.64154e+07	1.75317e+07	1.44036e+07	8.60494e+06	16906210	1.70263e+07	1.67263e+07
PS(18:0/22:4)+H	PS(40:4)+H	PS	(18:0/22:4)	(18:0)	(22:4)			C46 H83 O10 N1 P1	840.575	11.3868	0.0351208	5.69291e+07	7.71901e+07	5.35212e+07	2.26311e+07	5.26323e+07	6.1648e+07	6.01571e+07	3.32986e+07	3.15864e+07	2.61417e+07	4.113e+07	4.37453e+07	4.37302e+07
PE(16:0/20:4)-H	PE(36:4)-H	PE	(16:0/20:4)	(16:0)	(20:4)			C41 H73 O8 N1 P1	738.508	10.883	0.00789898	1.02315e+07	9.64024e+06	8.1836e+06	7.6983e+06	1.27803e+07	2.2415e+07	1.76568e+07	1.56525e+07	1.38104e+07	11117671	1.17993e+07	1.16391e+07	1.18003e+07
PC(40:3)+H	PC(40:3)+H	PC	(40:3)	(40:3)				C48 H91 O8 N1 P1	840.648	12.6457	0.00571126	7.01707e+06	1.83374e+07	1.25686e+07	6.02723e+06	1.28107e+07	3.36434e+07	2.87894e+07	1.4287e+07	1.68366e+07	1.2325e+07	1.73482e+07	1.71773e+07	1.73485e+07
PC(40:3)+H	PC(40:3)+H	PC	(40:3)	(40:3)				C48 H91 O8 N1 P1	840.648	12.9891	0.00537697	1.96298e+07	1.89699e+07	1.54737e+07	6.82823e+06	1.8134e+07	9.39996e+06	7.70973e+06	1.61587e+07	8.61295e+06	5.55565e+06	1.17248e+07	1.17248e+07	1.18344e+07
SM(d44:2)+H	SM(d44:2)+H	SM	(d44:2)	(d44:2)				C49 H98 O6 N2 P1	841.716	14.6226	0.00858641	10935009	1.31159e+07	1.03902e+07	7.87051e+06	9.67684e+06	1.8578e+07	1.42755e+07	1.44862e+07	1.10585e+07	8.42214e+06	1.19136e+07	1.20923e+07	1.20929e+07
PC(40:2)+H	PC(40:2)+H	PC	(40:2)	(40:2)				C48 H93 O8 N1 P1	842.663	13.488	0.00548404	8.11248e+06	1.07788e+07	1.08719e+07	6.99774e+06	1.25735e+07	1.83291e+07	1.05346e+07	1.11227e+07	9.16962e+06	6.99667e+06	1.00377e+07	9.94378e+06	9.94214e+06
TG(14:0/18:2/18:3)+NH4	TG(50:5)+NH4	TG	(14:0/18:2/18:3)	(14:0)	(18:2)	(18:3)		C53 H96 O6 N1	842.723	18.7053	0.0547867	305356	16768.8		7.3024e+06	385951	1.19898e+07	8.02636e+06	2.52882e+06	1.22135e+07	5.63762e+06	5.39669e+06	5.92805e+06	5.40131e+06
TG(14:0/18:2/18:3)+NH4	TG(50:5)+NH4	TG	(14:0/18:2/18:3)	(14:0)	(18:2)	(18:3)		C53 H96 O6 N1	842.723	18.245	0.0206326	3.66766e+06	202407	24461.9	1.71949e+08	6.72524e+06	3.749e+07	2.54647e+07	1.18042e+07	4.32885e+07	2.51937e+07	4.4223e+07	4.4192e+07	4.58062e+07
SM(d44:1)+H	SM(d44:1)+H	SM	(d44:1)	(d44:1)				C49 H100 O6 N2 P1	843.731	15.9681	0.0229757	3.68062e+06	3.80623e+06	2.67081e+06	2.96317e+06	3.16076e+06	5.16299e+06	4.47102e+06	3.52574e+06	1.87846e+06	2.04199e+06	3.08899e+06	3.08921e+06	3.21368e+06
PS(40:2)+H	PS(40:2)+H	PS	(40:2)	(40:2)				C46 H87 O10 N1 P1	844.606	12.503	0.0900163	8.15982e+06	3.32471e+06	5.2439e+06	3.25075e+06	1.09464e+07	1.2036e+07	6.82276e+06	2.80347e+06	3.09369e+06	2.46955e+06	5.25038e+06	4.98498e+06	5.92551e+06
PC(40:5e)+Na	PC(40:5e)+Na	PC	(40:5e)	(40:5e)				C48 H88 O7 N1 P1 Na1	844.619	11.9096	0.00708064	1.19263e+07	1.34483e+07	1.31633e+07	9.27042e+06	1.3638e+07	4.62307e+07	1.84123e+07	1.27495e+07	1.94925e+07	1.9775e+07	1.76089e+07	1.73946e+07	1.73948e+07
PC(40:1)+H	PC(40:1)+H	PC	(40:1)	(40:1)				C48 H95 O8 N1 P1	844.679	14.458	0.0120781	2.22563e+06	2.15468e+06	2.63996e+06	1.68655e+06	4.03214e+06	2.67014e+06	1.85484e+06	2.30021e+06	1.42894e+06	1.311e+06	2.27337e+06	2.22636e+06	2.27381e+06
PE(18:1/18:2)-H	PE(36:3)-H	PE	(18:1/18:2)	(18:1)	(18:2)			C41 H75 O8 N1 P1	740.524	11.1385	0.0128394	9.31225e+06	5.61498e+06	6.22967e+06	1.26399e+07	1.32606e+07	2.79936e+07	1.47427e+07	1.51262e+07	9.37547e+06	9.59227e+06	1.29208e+07	1.26352e+07	1.29201e+07
TG(18:1/14:0/18:3)+NH4	TG(50:4)+NH4	TG	(18:1/14:0/18:3)	(18:1)	(14:0)	(18:3)		C53 H98 O6 N1	844.739	19.2389	0.00305296	5.98956e+07	4.86023e+06	1.45458e+06	3968532801	8.58521e+07	1362741325	5.06927e+08	2.17886e+08	1072648171	8.67906e+08	8.98634e+08	9.03396e+08	8.98638e+08
TG(14:0/18:2/18:2)+NH4	TG(50:4)+NH4	TG	(14:0/18:2/18:2)	(14:0)	(18:2)	(18:2)		C53 H98 O6 N1	844.739	19.9428	0.00628519	3.83168e+06	369104	41658.7	8.83244e+07	3.98806e+06	63900726	7.03704e+07	2.67457e+07	1.23692e+08	6.08358e+07	4.91148e+07	4.91155e+07	4.96518e+07
PS(40:1)+H	PS(40:1)+H	PS	(40:1)	(40:1)				C46 H89 O10 N1 P1	846.622	13.5689	0.0112688	4.91705e+06	6.54147e+06	8.13755e+06	6.76285e+06	1.31332e+07	5.69572e+06	7.71076e+06	8.12748e+06	5.44813e+06	2.46873e+06	5.88163e+06	5.99736e+06	5.88198e+06
PC(40:3p)+Na	PC(40:3p)+Na	PC	(40:3p)	(40:3p)				C48 H90 O7 N1 P1 Na1	846.635	12.8455	0.000749101	3.56519e+06	3.01701e+06	3.64868e+06	478818	4.07551e+06	7.23883e+06	4.83389e+06	3.24703e+06	2.04368e+06	877560	3.18215e+06	3.18215e+06	3.17802e+06
TG(16:0/16:1/18:2)+NH4	TG(50:3)+NH4	TG	(16:0/16:1/18:2)	(16:0)	(16:1)	(18:2)		C53 H100 O6 N1	846.755	20.344	0.00300824	3.49468e+08	1.62954e+07	4.31399e+06	9003380423	444331568	9410637235	6989324690	3913915650	11043756225	7095682215	5693357827	5663803650	5663787775
SM(d45:5)+H	SM(d45:5)+H	SM	(d45:5)	(d45:5)				C50 H94 O6 N2 P1	849.684	14.036	0.0250405	1.19587e+06	1.60631e+06	1.39727e+06	857129	2.08708e+06	2.21759e+06	1.6609e+06	1.73775e+06	1.6734e+06	758133	1.55503e+06	1.61935e+06	1.54772e+06
PE(18:1/18:1)-H	PE(36:2)-H	PE	(18:1/18:1)	(18:1)	(18:1)			C41 H77 O8 N1 P1	742.539	11.9176	0.0122271	3.50747e+07	4.65601e+07	3.53074e+07	5.44246e+07	7.10405e+07	1.11796e+08	7.7249e+07	4.51553e+07	4.86112e+07	3.30225e+07	4.55441e+07	4.45813e+07	4.55337e+07
TG(16:0/16:0/18:1)+NH4	TG(50:1)+NH4	TG	(16:0/16:0/18:1)	(16:0)	(16:0)	(18:1)		C53 H104 O6 N1	850.786	22.962	0.0212728	7.10673e+06	4.34468e+06	5.01761e+06	3.74804e+07	1.01781e+07	1.53127e+08	1.4577e+08	1.11829e+08	1.77252e+08	1.77259e+08	9.6917e+07	9.7054e+07	9.34573e+07
TG(16:0/18:2/18:3)+H	TG(52:5)+H	TG	(16:0/18:2/18:3)	(16:0)	(18:2)	(18:3)		C55 H97 O6	853.728	19.5178	0.0294345	211940	39202.5	86656	2.12831e+07	906683	6.55591e+06	5.10026e+06	1.29812e+06	8.96912e+06	5.06132e+06	7.55755e+06	7.94606e+06	7.55107e+06
PI(34:1)+NH4	PI(34:1)+NH4	PI	(34:1)	(34:1)				C43 H85 O13 N1 P1	854.575	10.4298	0.0354799	1.4762e+06	1.46776e+06	1.83716e+06	1.89528e+06	2.7526e+06	1.67914e+07	7.10041e+06	4.25073e+06	6.55547e+06	4.37246e+06	3.64363e+06	3.42009e+06	3.43804e+06
TG(16:0/18:1/18:3)+H	TG(52:4)+H	TG	(16:0/18:1/18:3)	(16:0)	(18:1)	(18:3)		C55 H99 O6	855.744	20.5007	0.0191876	9.97705e+06	447177	349821	1.35831e+08	1.12337e+07	7.70355e+07	7.86494e+07	3.28459e+07	4.82694e+07	7.48627e+07	7.23791e+07	7.48232e+07	7.48546e+07
PC(40:6)+Na	PC(40:6)+Na	PC	(40:6)	(40:6)				C48 H84 O8 N1 P1 Na1	856.583	11.2835	0.0137289	1.63085e+07	1.59909e+07	1.29447e+07	1.11875e+07	1.41735e+07	3.93991e+07	3.04165e+07	1.98933e+07	2.38938e+07	1.37695e+07	1.99112e+07	1.94459e+07	1.94443e+07
PC(40:6)+Na	PC(40:6)+Na	PC	(18:0/22:6)	(18:0)	(22:6)			C48 H84 O8 N1 P1 Na1	856.583	10.7688	0.0127356	2.30525e+07	2.5882e+07	1.02851e+07	1.88858e+07	1.10928e+07	2.59356e+07	1.48801e+07	1.06885e+07	1.34459e+07	1.44531e+07	1.35609e+07	1.35465e+07	1.38547e+07
TG(16:0/18:1/18:2)+H	TG(52:3)+H	TG	(16:0/18:1/18:2)	(16:0)	(18:1)	(18:2)		C55 H101 O6	857.759	21.4748	0.00685142	1.4555e+07	350985	152458	9.10587e+07	1.57038e+07	1.07906e+08	8.59924e+07	5.62164e+07	1.05195e+08	9.36563e+07	7.92647e+07	7.8319e+07	7.83444e+07
PC(40:5)+Na	PC(40:5)+Na	PC	(40:5)	(40:5)				C48 H86 O8 N1 P1 Na1	858.598	11.3662	0.00686093	1.51279e+07	1.69317e+07	1.6967e+07	1.12752e+07	1.77144e+07	2.46869e+07	2.04685e+07	1.29735e+07	1.63192e+07	1.21033e+07	1.62093e+07	1.60172e+07	1.62088e+07
PC(42:8)+H	PC(42:8)+H	PC	(42:8)	(42:8)				C50 H85 O8 N1 P1	858.601	10.3998	0.0235952	7.66234e+06	1.00428e+07	1.06712e+07	5.89989e+06	6.90096e+06	9.80143e+06	7.77881e+06	4.27198e+06	6.06155e+06	3.42496e+06	7.59721e+06	7.29925e+06	7.61392e+06
PE(18:0/18:1)-H	PE(36:1)-H	PE	(18:0/18:1)	(18:0)	(18:1)			C41 H79 O8 N1 P1	744.555	12.8201	0.00266109	1.06739e+08	110809705	153728131	8.92113e+07	1.46731e+08	1.28894e+08	9.46981e+07	1.19309e+08	9.31352e+07	5.24789e+07	9.86674e+07	9.82115e+07	9.86638e+07
TG(15:0/18:2/18:2)+NH4	TG(51:4)+NH4	TG	(15:0/18:2/18:2)	(15:0)	(18:2)	(18:2)		C54 H100 O6 N1	858.755	19.875	0.00368605	7.20941e+06	616706	133929	3.92996e+08	8.57616e+06	1.14544e+08	1.09119e+08	3.0351e+07	1.67443e+08	1.14182e+08	1.10166e+08	1.10869e+08	1.10876e+08
PC(40:4)+Na	PC(40:4)+Na	PC	(40:4)	(40:4)				C48 H88 O8 N1 P1 Na1	860.614	12.2135	0.00199522	7.90371e+07	8.47868e+07	7.9487e+07	4.40678e+07	7.02828e+07	6.70272e+07	6.61047e+07	4.42307e+07	4.62894e+07	2.35288e+07	5.81046e+07	5.81042e+07	5.83055e+07
TG(15:0/18:1/18:2)+NH4	TG(51:3)+NH4	TG	(15:0/18:1/18:2)	(15:0)	(18:1)	(18:2)		C54 H102 O6 N1	860.77	20.9437	0.00761602	3.13555e+07	2.21209e+06	459572	1323691487	3.8364e+07	1518839019	1094495041	4.16032e+08	1914498706	1229901044	8.64635e+08	8.76058e+08	8.76224e+08
TG(18:0p/16:0/18:2)+NH4	TG(52:2p)+NH4	TG	(18:0p/16:0/18:2)	(18:0p)	(16:0)	(18:2)		C55 H106 O5 N1	860.807	22.6554	0.0135614	1.5304e+06	207774	75778.4	3.27383e+07	1.26547e+06	4.00164e+07	3.16703e+07	1.82395e+07	4.33842e+07	1.42712e+07	2.25289e+07	2.30608e+07	2.25261e+07
SM(d46:6)+H	SM(d46:6)+H	SM	(d46:6)	(d46:6)				C51 H94 O6 N2 P1	861.684	13.5931	0.0195054	6.95179e+06	1.00695e+07	6.10885e+06	4.1351e+06	7.00535e+06	7.08724e+06	5.69574e+06	6.43058e+06	4.10118e+06	2.70093e+06	5.6766e+06	5.67645e+06	5.48688e+06
PS(40:4)+Na	PS(40:4)+Na	PS	(18:0/22:4)	(18:0)	(22:4)			C46 H82 O10 N1 P1 Na1	862.557	11.3868	0.030512	1.17765e+07	9.19491e+06	1.07121e+07	8.37503e+06	1.30768e+07	5.67931e+06	1.21515e+07	8.71944e+06	7.07443e+06	3.9174e+06	8.75629e+06	8.75426e+06	8.30058e+06
Co(Q10)+H	Co(Q10)+H	Co	(Q10)	(Q10)				C59 H91 O4	863.691	18.6515	0.0311387	4.00263e+06	4.2944e+06	4.86215e+06	7.67744e+06	4.67803e+06	7.83213e+06	7.512e+06	4.05287e+06	6.02713e+06	3.86842e+06	5.92167e+06	5.6127e+06	5.61406e+06
SM(d46:5)+H	SM(d46:5)+H	SM	(d46:5)	(d46:5)				C51 H96 O6 N2 P1	863.7	14.6187	0.0472522	2.35345e+06	3.28227e+06	2.48015e+06	5.63493e+06	2.39126e+06	4.35385e+06	3.70011e+06	3.5234e+06	2.10159e+06	1.6506e+06	2.48289e+06	2.48319e+06	2.28521e+06
CerG1(d45:5)+NH4	CerG1(d45:5)+NH4	CerG1	(d45:5)	(d45:5)				C51 H95 O8 N2	863.708	19.8678	0.00258823	1.44183e+07	1.28657e+06	371165	2.06102e+08	1.71807e+07	6.79691e+07	9.92947e+07	4.45955e+07	138129607	1.11362e+08	1.10113e+08	110119051	110610262
SM(d34:2)+HCOO	SM(d34:2)+HCOO	SM	(d34:2)	(d34:2)				C40 H78 O8 N2 P1	745.55	9.43138	0.00443714	4.15857e+07	4.52075e+07	5.70935e+07	2.79293e+07	6.05702e+07	3.39327e+07	2.09906e+07	5.24372e+07	3.53538e+07	2.3341e+07	3.76226e+07	3.73357e+07	3.73341e+07
PC(42:5)+H	PC(42:5)+H	PC	(42:5)	(42:5)				C50 H91 O8 N1 P1	864.648	12.0863	0.00332368	5.18822e+06	6.75671e+06	7.37401e+06	3.80406e+06	7.22274e+06	1.18504e+07	1.13638e+07	4.58832e+06	5.96134e+06	4.29856e+06	5.87037e+06	5.87049e+06	5.8367e+06
PC(42:5)+H	PC(42:5)+H	PC	(42:5)	(42:5)				C50 H91 O8 N1 P1	864.648	12.4967	0.0162257	1.56966e+07	1.99497e+07	1.60116e+07	7.88763e+06	1.43595e+07	1.66306e+07	1.53153e+07	1.08804e+07	1.18295e+07	7.35544e+06	1.27654e+07	1.31295e+07	1.27691e+07
PC(40:2)+Na	PC(40:2)+Na	PC	(40:2)	(40:2)				C48 H92 O8 N1 P1 Na1	864.645	13.488	0.0143948	2.86268e+06	2.34092e+06	2.78035e+06	1.0832e+06	3.84501e+06	3.52751e+06	2.36528e+06	2.3682e+06	1.77058e+06	1.38027e+06	2.42905e+06	2.36921e+06	2.4295e+06
TG(16:0/17:0/18:1)+NH4	TG(51:1)+NH4	TG	(16:0/17:0/18:1)	(16:0)	(17:0)	(18:1)		C54 H106 O6 N1	864.801	23.2058	0.0778572	1.98804e+06	584549	421090	2.19088e+07	1.98962e+06	5.40639e+07	2.01372e+08	4.16267e+07	5.79847e+07	2.18107e+08	4.60327e+07	5.21403e+07	5.33797e+07
TG(18:0e/16:0/18:1)+NH4	TG(52:1e)+NH4	TG	(18:0e/16:0/18:1)	(18:0e)	(16:0)	(18:1)		C55 H110 O5 N1	864.838	23.8627	0.00687487	1.72643e+06	297017	306544	5.21359e+07	1.24785e+06	4.93987e+07	3.78212e+07	7.15228e+07	9.93864e+07	2.90481e+07	3.79284e+07	3.74805e+07	3.74801e+07
PC(42:4)+H	PC(42:4)+H	PC	(42:4)	(42:4)				C50 H93 O8 N1 P1	866.663	12.8742	0.00495835	7.83286e+06	9.31819e+06	8.13702e+06	5.257e+06	7.98313e+06	7.99753e+06	1.24549e+07	5.2574e+06	6.25699e+06	4.46644e+06	6.74665e+06	6.68899e+06	6.74689e+06
TG(16:1/18:2/18:3)+NH4	TG(52:6)+NH4	TG	(16:1/18:2/18:3)	(16:1)	(18:2)	(18:3)		C55 H98 O6 N1	868.739	18.3522	0.0512811	7.7e+06	160423	23207.8	2.01728e+08	7.33913e+06	7.96539e+07	6.26664e+07	1.383e+07	6.52918e+07	2.9831e+07	7.55024e+07	8.26779e+07	8.25826e+07
TG(16:1/18:2/18:3)+NH4	TG(52:6)+NH4	TG	(16:1/18:2/18:3)	(16:1)	(18:2)	(18:3)		C55 H98 O6 N1	868.739	18.8209	0.0343123	4.25488e+06	118717		7.81627e+07	4.6491e+06	3.17137e+07	3.61955e+07	1.14144e+07	5.51107e+07	2.77409e+07	3.10954e+07	3.10932e+07	2.92822e+07
PE(38:6p)-H	PE(38:6p)-H	PE	(38:6p)	(38:6p)				C43 H73 O7 N1 P1	746.513	10.6763	0.000374793	5.9344e+07	6.06905e+07	6.8075e+07	3.39978e+07	6.00056e+07	115313598	6.97636e+07	5.1201e+07	5.04353e+07	2.90499e+07	5.17548e+07	5.1722e+07	5.17563e+07
PC(42:2)+H	PC(42:2)+H	PC	(42:2)	(42:2)				C50 H97 O8 N1 P1	870.695	14.5413	0.0110875	2.28766e+06	2.71576e+06	3.00244e+06	1.28612e+06	2.91604e+06	3.10364e+06	1.95881e+06	2.47342e+06	1.71144e+06	2.22907e+06	2.2325e+06	2.2757e+06	2.23259e+06
TG(16:0/18:2/18:3)+NH4	TG(52:5)+NH4	TG	(16:0/18:2/18:3)	(16:0)	(18:2)	(18:3)		C55 H100 O6 N1	870.755	19.5178	0.0358844	7.19241e+07	4.03767e+06	1.40483e+06	3689374403	1.04058e+08	1173918639	898507406	3.14103e+08	1567909516	9.88185e+08	1572422373	1673269107	1574420734
TG(16:0/18:2/18:3)+NH4	TG(52:5)+NH4	TG	(16:0/18:2/18:3)	(16:0)	(18:2)	(18:3)		C55 H100 O6 N1	870.755	19.9512	0.0797213	2.00091e+07	3.66836e+06	3.30581e+06	9.19156e+08	2.61533e+07	478734813	1.83476e+08	7.31312e+07	3.43725e+08	1.99307e+08	316366614	2.74892e+08	3.17021e+08
PC(42:1)+H	PC(42:1)+H	PC	(42:1)	(42:1)				C50 H99 O8 N1 P1	872.71	15.782	0.00558455	1.85743e+06	2.3988e+06	1.46712e+06	795122	2.61484e+06	1.17989e+06	1.401e+06	1.43379e+06	540368	794939	1.26632e+06	1.25405e+06	1.2662e+06
TG(16:0/18:1/18:3)+NH4	TG(52:4)+NH4	TG	(16:0/18:1/18:3)	(16:0)	(18:1)	(18:3)		C55 H102 O6 N1	872.77	20.5007	0.00155266	2213637810	8.82898e+07	2.42981e+07	31858916979	2703657251	20029565367	15189482048	8337888348	22212770745	18462365476	16886409553	16841031664	16886397203
TG(16:0/18:2/18:2)+NH4	TG(52:4)+NH4	TG	(16:0/18:2/18:2)	(16:0)	(18:2)	(18:2)		C55 H102 O6 N1	872.77	21.1496	0.00470097	4.11178e+07	3.64164e+06	1.34382e+06	1047903015	4.46092e+07	1005708978	7.56155e+08	4.3171e+08	1287050239	8.82005e+08	6.86948e+08	6.92553e+08	6.86941e+08
TG(16:0/18:1/18:2)+NH4	TG(52:3)+NH4	TG	(16:0/18:1/18:2)	(16:0)	(18:1)	(18:2)		C55 H104 O6 N1	874.786	17.818	0.00614694	9.30157e+06	5.79445e+06	4.96311e+06	2.24015e+08	1.71397e+07	1.19307e+08	4.79006e+07	3.65562e+07	1.09697e+08	3.87117e+07	7.33439e+07	7.33626e+07	7.41368e+07
TG(16:0/18:2/18:3)+Na	TG(52:5)+Na	TG	(16:0/18:2/18:3)	(16:0)	(18:2)	(18:3)		C55 H96 O6 Na1	875.71	19.5178	0.0127833	1.1817e+08	1.24039e+07	4.31285e+06	5.65312e+08	1.60726e+08	5.12801e+08	5.37643e+08	3.25281e+08	6.36e+08	7.33889e+08	4.75288e+08	4.64852e+08	4.7531e+08
PI(16:0/20:4)+NH4	PI(36:4)+NH4	PI	(16:0/20:4)	(16:0)	(20:4)			C45 H83 O13 N1 P1	876.56	9.49136	0.00119388	1.86688e+06	2.17763e+06	1.88419e+06	1.60765e+06	2.92238e+06	4.95542e+06	126232	2.73322e+06	2.69729e+06	2.42264e+06	2.72845e+06	2.7341e+06	2.73409e+06
PE(16:0p/22:6)-H	PE(38:6p)-H	PE	(16:0p/22:6)	(16:0p)	(22:6)			C43 H73 O7 N1 P1	746.513	11.0554	0.00537806	1.10822e+07	1.14944e+07	9.67345e+06	8.20991e+06	1.25536e+07	3.80728e+07	3.18744e+07	2.29167e+07	1.78178e+07	1.56774e+07	1.60125e+07	1.60093e+07	1.61605e+07
PI(36:3)+NH4	PI(36:3)+NH4	PI	(36:3)	(36:3)				C45 H85 O13 N1 P1	878.575	9.75525	0.00543179	1.02598e+06	1.00978e+06	1.28874e+06	1.16314e+06	1.43063e+06	3.46102e+06	1.86706e+06	763096	1.17373e+06	932988	1.42389e+06	1.42411e+06	1.41065e+06
TG(18:2/18:2/18:2)+H	TG(54:6)+H	TG	(18:2/18:2/18:2)	(18:2)	(18:2)	(18:2)		C57 H99 O6	879.744	19.4202	0.00784011	1.28008e+06	417609	474514	7.0544e+07	1.41522e+06	3.84175e+06	3.25776e+06	1.28345e+06	5.94169e+06	2.81313e+06	1.89182e+07	1.89203e+07	1.86635e+07
PI(36:2)+NH4	PI(36:2)+NH4	PI	(36:2)	(36:2)				C45 H87 O13 N1 P1	880.591	10.6569	0.0103948	9.82994e+06	1.28662e+07	1.523e+07	1.6666e+07	1.60879e+07	2.14401e+07	1.36668e+07	1.09109e+07	1.19174e+07	1.14799e+07	1.40885e+07	1.38357e+07	1.40872e+07
Co(Q10)+NH4	Co(Q10)+NH4	Co	(Q10)	(Q10)				C59 H94 O4 N1	880.718	18.6515	0.00204795	1.7544e+07	1.95947e+07	2.27845e+07	2.9709e+07	1.96127e+07	3.2114e+07	3.1303e+07	1.71811e+07	2.43272e+07	1.63309e+07	2.35992e+07	2.35099e+07	2.35229e+07
TG(16:0/18:1/18:1)+Na	TG(52:2)+Na	TG	(16:0/18:1/18:1)	(16:0)	(18:1)	(18:1)		C55 H102 O6 Na1	881.757	27.7871	0.02704	1.00498e+06	1.13774e+06	1.81422e+06	1.08834e+07	1.10033e+06	2.13344e+07	7.24261e+06	8.81347e+06	4.4292e+07	9.39071e+06	5.72189e+06	5.72403e+06	5.99524e+06
TG(16:0/18:1/18:1)+Na	TG(52:2)+Na	TG	(16:0/18:1/18:1)	(16:0)	(18:1)	(18:1)		C55 H102 O6 Na1	881.757	26.69	0.0457591	2.33661e+06	2.30604e+06	2.25101e+06	8.92771e+06	1.24593e+06	9129506	7.75008e+06	5.93601e+06	5.60027e+07	5.83516e+06	7.95893e+06	7.94752e+06	7.33918e+06
TG(18:0/16:0/20:5)+H	TG(54:5)+H	TG	(18:0/16:0/20:5)	(18:0)	(16:0)	(20:5)		C57 H101 O6	881.759	26.829	0.0997177	1.29079e+06	1.28116e+06	1.37711e+06	4.46524e+06	1.07294e+06	5.79311e+06	4.63771e+06	2.82307e+06	1.10545e+07	4.0298e+06	4.7639e+06	4.63086e+06	5.55003e+06
PG(16:0/18:1)-H	PG(34:1)-H	PG	(16:0/18:1)	(16:0)	(18:1)			C40 H76 O10 N0 P1	747.518	10.6798	0.000354182	7.3492e+07	6.9554e+07	6.47618e+07	2.95438e+07	6.48105e+07	1.75328e+08	1.00703e+08	1.00141e+08	8.50252e+07	4.24562e+07	6.20763e+07	6.21144e+07	6.20763e+07
TG(16:0/18:1/18:1)+Na	TG(52:2)+Na	TG	(16:0/18:1/18:1)	(16:0)	(18:1)	(18:1)		C55 H102 O6 Na1	881.757	25.6942	0.0628197	887518	1.93531e+06	1.90352e+06	1.23495e+07	970192	1.53561e+07	1.34323e+07	4.28672e+06	1.54553e+07	7.43584e+06	6.9264e+06	7.03471e+06	7.76286e+06
TG(16:0/18:1/18:1)+Na	TG(52:2)+Na	TG	(16:0/18:1/18:1)	(16:0)	(18:1)	(18:1)		C55 H102 O6 Na1	881.757	28.8275	0.0558971	863024	828400	948021	6.07071e+06	1.078e+06	6.90357e+06	4.76493e+06	6.76031e+06	17911121	2.78835e+07	4.19412e+06	4.60153e+06	4.17273e+06
TG(16:0/18:1/18:1)+Na	TG(52:2)+Na	TG	(16:0/18:1/18:1)	(16:0)	(18:1)	(18:1)		C55 H102 O6 Na1	881.757	24.1198	0.172018	524744	1.22096e+06	1.25447e+06	3.31028e+07	632080	9.41636e+06	9.65706e+06	5.32995e+06	9.30357e+06	8.6454e+06	1.66315e+07	1.25942e+07	1.24059e+07
TG(18:1/18:2/18:2)+H	TG(54:5)+H	TG	(18:1/18:2/18:2)	(18:1)	(18:2)	(18:2)		C57 H101 O6	881.759	20.5065	0.0182462	6.38663e+06	958134	1.72165e+06	4.56903e+07	3.52312e+06	2.3007e+07	2.20069e+07	7.74193e+06	1.52516e+07	1.76361e+07	3.46611e+07	3.57544e+07	3.5804e+07
TG(16:0/18:1/18:1)+Na	TG(52:2)+Na	TG	(16:0/18:1/18:1)	(16:0)	(18:1)	(18:1)		C55 H102 O6 Na1	881.757	23.247	0.049699	1.2206e+07	4.637e+06	7.03235e+06	2.65293e+08	1.18539e+07	9.86653e+07	4.64902e+08	5.97948e+07	4.49989e+07	4.58964e+08	5.16281e+07	5.02597e+07	4.68441e+07
PI(36:1)+NH4	PI(36:1)+NH4	PI	(36:1)	(36:1)				C45 H89 O13 N1 P1	882.607	11.407	0.013771	4.0967e+06	5.34216e+06	5.90222e+06	3.92059e+06	6.2706e+06	1.06717e+07	5.63166e+06	5.52816e+06	6.46736e+06	2.9841e+06	5.03163e+06	5.02839e+06	4.91101e+06
TG(18:2/17:1/18:2)+NH4	TG(53:5)+NH4	TG	(18:2/17:1/18:2)	(18:2)	(17:1)	(18:2)		C56 H102 O6 N1	884.77	19.9012	0.00413656	6.6265e+06	586100	612802	3.7717e+08	8.19942e+06	1.13168e+08	6.32927e+07	1.91976e+07	1.34841e+08	6.07033e+07	9.09527e+07	9.09564e+07	9.16078e+07
PI(18:1/18:1)+Na	PI(36:2)+Na	PI	(18:1/18:1)	(18:1)	(18:1)			C45 H83 O13 N0 P1 Na1	885.546	9.60285	0.0105512	1.2785e+06	1.5207e+06	1.42207e+06	965703	1.80868e+06	2.92742e+06	2.10414e+06	1.63031e+06	1.58205e+06	876267	1.56155e+06	1.59099e+06	1.56304e+06
TG(18:1/17:1/18:2)+NH4	TG(53:4)+NH4	TG	(18:1/17:1/18:2)	(18:1)	(17:1)	(18:2)		C56 H104 O6 N1	886.786	21.038	0.0110054	1.78702e+07	2.04746e+06	397951	634216348	2.0177e+07	835321769	8.66851e+08	2.03119e+08	9.06072e+08	9.03887e+08	4.14341e+08	4.22437e+08	4.14637e+08
PI(18:0/20:4)+H	PI(38:4)+H	PI	(18:0/20:4)	(18:0)	(20:4)			C47 H84 O13 N0 P1	887.564	10.5303	0.0115061	2.84115e+07	3.76082e+07	3.61402e+07	2.47185e+07	3.63859e+07	4.858e+07	4.05197e+07	3.58615e+07	2.75666e+07	2.31552e+07	3.44153e+07	3.39236e+07	3.36426e+07
SM(d16:0/18:1)+HCOO	SM(d34:1)+HCOO	SM	(d16:0/18:1)	(d16:0)	(18:1)			C40 H80 O8 N2 P1	747.566	10.4596	0.00336864	4.50352e+08	4.62696e+08	4.87764e+08	3.44605e+08	5.114e+08	7.4312e+08	5.91185e+08	611699604	5.98068e+08	3.80111e+08	4.91235e+08	494116181	494108990
LPS(18:0)-H	LPS(18:0)-H	LPS	(18:0)	(18:0)				C24 H47 O9 N1 P1	524.299	3.23815	0.00487114	651234	796092	693195	1.4804e+06	788393	2.02936e+06	1.00053e+06	2.6485e+06	8.78502e+06	561982	1.65257e+06	1.66651e+06	1.65249e+06
TG(17:0/18:1/18:2)+NH4	TG(53:3)+NH4	TG	(17:0/18:1/18:2)	(17:0)	(18:1)	(18:2)		C56 H106 O6 N1	888.801	21.946	0.0282976	1.05281e+08	3.54067e+06	1.72677e+06	2431199903	1.02288e+08	3652727084	1389168629	8.49924e+08	3821562654	1413907344	1626302731	1624508643	1706379567
TG(25:1/12:2/16:0)+NH4	TG(53:3)+NH4	TG	(25:1/12:2/16:0)	(25:1)	(12:2)	(16:0)		C56 H106 O6 N1	888.801	20.3471	0.00472291	1.58219e+07	2.07956e+06	2.16208e+06	1.36957e+08	2.04984e+07	1.52952e+08	1.39069e+08	9.61089e+07	1.66488e+08	1.42895e+08	1.26334e+08	1.25304e+08	1.25307e+08
TG(54:1p)+NH4	TG(54:1p)+NH4	TG	(54:1p)	(54:1p)				C57 H112 O5 N1	890.854	23.802	0.0138069	321150			1.1635e+07	175689	2.34706e+07	1.0268e+07	6.86231e+06	1.2977e+07	5.05508e+06	7.64952e+06	7.65022e+06	7.83428e+06
PC(44:5)+H	PC(44:5)+H	PC	(44:5)	(44:5)				C52 H95 O8 N1 P1	892.679	13.4644	0.0269475	2.42786e+06	3.7494e+06	2.75402e+06	1.31425e+06	2.68066e+06	2.99833e+06	1.5641e+06	2.93838e+06	1.30588e+06	1.87057e+06	2.34043e+06	2.23248e+06	2.33962e+06
TG(18:3/18:2/18:3)+NH4	TG(54:8)+NH4	TG	(18:3/18:2/18:3)	(18:3)	(18:2)	(18:3)		C57 H98 O6 N1	892.739	17.4744	0.0116614	1.20179e+06	14440.1		6.91719e+07	1.68282e+06	1.98849e+06	1.6193e+06	547146	2.86604e+06	2.03766e+06	1.18487e+07	1.18489e+07	1.16111e+07
TG(18:3/18:2/18:2)+NH4	TG(54:7)+NH4	TG	(18:3/18:2/18:2)	(18:3)	(18:2)	(18:2)		C57 H100 O6 N1	894.755	18.4446	0.00129932	2.93028e+07	2.25435e+06	701197	2342111246	3.78283e+07	6.99663e+07	5.49421e+07	1.90033e+07	1.24235e+08	5.55941e+07	3.42939e+08	3.4378e+08	3.431e+08
TG(16:1/18:2/20:4)+NH4	TG(54:7)+NH4	TG	(16:1/18:2/20:4)	(16:1)	(18:2)	(20:4)		C57 H100 O6 N1	894.755	18.8651	0.0311781	7.58895e+06	295190	109645	3.03274e+08	9.12749e+06	3.46704e+07	2.40603e+07	1.48079e+07	5.3522e+07	2.52977e+07	8.05491e+07	7.63636e+07	7.63374e+07
TG(18:3/18:2/18:2)+NH4	TG(54:7)+NH4	TG	(18:3/18:2/18:2)	(18:3)	(18:2)	(18:2)		C57 H100 O6 N1	894.755	19.1542	0.00386195	2.78852e+06	136743	97882.6	99573390	4.76236e+06	5.63162e+07	4.47705e+07	1.76398e+07	8.4923e+07	4.92756e+07	4.58299e+07	4.61377e+07	4.61379e+07
PE(16:0p/22:5)-H	PE(38:5p)-H	PE	(16:0p/22:5)	(16:0p)	(22:5)			C43 H75 O7 N1 P1	748.529	11.4236	0.00585344	4.20752e+08	4.67759e+08	4.67893e+08	2.56165e+08	4.34673e+08	4.07095e+08	3.55695e+08	4.158e+08	342644623	2.23791e+08	3.42685e+08	3.39217e+08	3.39252e+08
TG(18:3/18:2/18:2)+NH4	TG(54:7)+NH4	TG	(18:3/18:2/18:2)	(18:3)	(18:2)	(18:2)		C57 H100 O6 N1	894.755	19.4233	0.00953843	976879	94188.1	150395	3.79179e+07	1.39621e+06	6.34234e+07	3.57462e+07	2.07944e+07	6.40934e+07	38488762	3.17356e+07	3.12171e+07	3.12168e+07
TG(18:0/17:0/18:0)+NH4	TG(53:0)+NH4	TG	(18:0/17:0/18:0)	(18:0)	(17:0)	(18:0)		C56 H112 O6 N1	894.848	23.8031	0.0237053	1.90566e+07	1.54572e+06	392045	2.51561e+08	1.08449e+07	2.34655e+08	2.506e+08	1.58608e+08	2.189e+08	3.31963e+08	2.76795e+08	2.88346e+08	2.88609e+08
TG(18:2/18:2/18:2)+NH4	TG(54:6)+NH4	TG	(18:2/18:2/18:2)	(18:2)	(18:2)	(18:2)		C57 H102 O6 N1	896.77	20.1148	0.00392658	4.1117e+07	3.48975e+06	3.9193e+06	1310349066	57442708	7.42057e+08	6.10578e+08	2.39014e+08	1195084085	7.40792e+08	6.54293e+08	6.54231e+08	6.49823e+08
TG(18:2/18:2/18:2)+NH4	TG(54:6)+NH4	TG	(18:2/18:2/18:2)	(18:2)	(18:2)	(18:2)		C57 H102 O6 N1	896.77	19.4202	0.00179269	3.64757e+08	1.9243e+07	5.87274e+06	19895735763	4.68618e+08	1964094110	7.58714e+08	2.3479e+08	2627439488	1369281808	5126603022	5110715666	5110719682
TG(18:1/18:2/18:2)+NH4	TG(54:5)+NH4	TG	(18:1/18:2/18:2)	(18:1)	(18:2)	(18:2)		C57 H104 O6 N1	898.786	20.5065	0.00728232	1559233111	5.48393e+07	1.69872e+07	21861029177	1823286555	8002080825	5888211707	2972761870	9101306036	5553156291	10101025747	9974713428	9974647469
TG(18:1/18:2/18:2)+NH4	TG(54:5)+NH4	TG	(18:1/18:2/18:2)	(18:1)	(18:2)	(18:2)		C57 H104 O6 N1	898.786	21.1537	0.00343902	1.07303e+08	7.62524e+06	2.50554e+06	2061025877	1.10193e+08	3426479479	2313221090	1179747553	3984012809	2883958897	1953606225	1953476922	1941928792
TG(18:1/18:1/18:2)+NH4	TG(54:4)+NH4	TG	(18:1/18:1/18:2)	(18:1)	(18:1)	(18:2)		C57 H106 O6 N1	900.801	21.5892	0.0370696	1095401975	8.4937e+07	2.05901e+07	22974460428	1957332814	8713080217	5541732221	3732303012	7705080891	8725735919	8708193683	8692252979	9270879614
TG(18:1/18:1/18:2)+NH4	TG(54:4)+NH4	TG	(18:1/18:1/18:2)	(18:1)	(18:1)	(18:2)		C57 H106 O6 N1	900.801	22.1098	0.000596902	156059011	9.66957e+06	4.61077e+06	2010799982	1.18598e+08	1721203746	1527422042	1323295866	2575861371	1607640416	1456712223	1456711465	1458218405
PI(18:1/20:4)+NH4	PI(38:5)+NH4	PI	(18:1/20:4)	(18:1)	(20:4)			C47 H85 O13 N1 P1	902.575	9.58667	0.0164797	4.70843e+06	5.41291e+06	6.03685e+06	3.84924e+06	6.54217e+06	1.01301e+07	8.43094e+06	6.16135e+06	5.91695e+06	3.62934e+06	5.85762e+06	6.02748e+06	6.02864e+06
TG(18:0/18:1/18:2)+NH4	TG(54:3)+NH4	TG	(18:0/18:1/18:2)	(18:0)	(18:1)	(18:2)		C57 H108 O6 N1	902.817	22.3498	0.0117143	3220901087	1.59024e+08	4.08598e+07	17836366526	2732366066	9913412449	10999270028	7219276160	10006161984	7208524774	9021944204	8841472759	8841196891
PE(16:0p/22:5)-H	PE(38:5p)-H	PE	(16:0p/22:5)	(16:0p)	(22:5)			C43 H75 O7 N1 P1	748.529	11.7238	0.00432505	5.23527e+07	5.01778e+07	5.3076e+07	3.16413e+07	5.89227e+07	4.6326e+07	4.98092e+07	6.50462e+07	4.59685e+07	3.06966e+07	4.53983e+07	4.57489e+07	4.57305e+07
TG(18:0/18:1/18:2)+NH4	TG(54:3)+NH4	TG	(18:0/18:1/18:2)	(18:0)	(18:1)	(18:2)		C57 H108 O6 N1	902.817	22.7521	0.055492	3.38245e+08	9.35625e+06	6.84634e+06	2863137728	2.56315e+08	1522797376	1013776379	1636736776	1459492163	1115385619	1365091456	1383272762	1247144715
TG(18:1/18:1/18:1)+NH4	TG(54:3)+NH4	TG	(18:1/18:1/18:1)	(18:1)	(18:1)	(18:1)		C57 H108 O6 N1	902.817	20.379	0.00111492	4.13085e+07	4.7625e+06	2.4524e+06	2.90687e+08	5.26295e+07	3.83984e+08	3.2475e+08	2.15496e+08	3.69772e+08	310180841	2.62221e+08	262727983	2.62727e+08
PI(18:0/20:4)+NH4	PI(38:4)+NH4	PI	(18:0/20:4)	(18:0)	(20:4)			C47 H87 O13 N1 P1	904.591	10.5303	0.00655953	1.10806e+08	1.4808e+08	138747186	8.69201e+07	130175036	1.67877e+08	1.60131e+08	1.35116e+08	1.10327e+08	6.42384e+07	1.1353e+08	1.12252e+08	112247717
TG(18:0/18:0/18:2)+NH4	TG(54:2)+NH4	TG	(18:0/18:0/18:2)	(18:0)	(18:0)	(18:2)		C57 H110 O6 N1	904.833	22.9843	0.0205771	1937363772	9.08165e+07	3.04167e+07	7779687465	1418577145	4358639570	3430598464	3738033220	5973968710	3195142060	4426494956	4439962302	4277512065
PI(18:1/20:4)+Na	PI(38:5)+Na	PI	(18:1/20:4)	(18:1)	(20:4)			C47 H81 O13 N0 P1 Na1	907.531	9.58667	0.0133226	1.48183e+06	1.61544e+06	1.8597e+06	1.24263e+06	2.21777e+06	3.2581e+06	2.78026e+06	2.19447e+06	1.91651e+06	1.23559e+06	1.91845e+06	1.9185e+06	1.96309e+06
TG(18:0/18:0/18:0)+NH4	TG(54:0)+NH4	TG	(18:0/18:0/18:0)	(18:0)	(18:0)	(18:0)		C57 H114 O6 N1	908.864	24.1152	0.00617344	1.42312e+08	1.06443e+07	7.54661e+06	1338629672	5.9149e+07	1153769871	1060016588	9.67658e+08	7.90147e+08	6.9e+08	1158972342	1146809157	1146530542
PI(18:0/20:4)+Na	PI(38:4)+Na	PI	(18:0/20:4)	(18:0)	(20:4)			C47 H83 O13 N0 P1 Na1	909.546	10.5303	0.00479022	3.56089e+07	3.98156e+07	3.96798e+07	2.94014e+07	3.86811e+07	4.14367e+07	4.25428e+07	3.78187e+07	3.18337e+07	2.2284e+07	3.31164e+07	3.28438e+07	3.28424e+07
TG(18:0/18:0/18:1)+Na	TG(54:1)+Na	TG	(18:0/18:0/18:1)	(18:0)	(18:0)	(18:1)		C57 H108 O6 Na1	911.804	23.5905	0.0113824	196022729	1.6641e+07	7.84516e+06	488589807	1.47667e+08	7.97013e+08	4.767e+08	619193011	786397714	4.79999e+08	4.8422e+08	4.93917e+08	4.9387e+08
TG(18:4/18:1/19:0)+NH4	TG(55:5)+NH4	TG	(18:4/18:1/19:0)	(18:4)	(18:1)	(19:0)		C58 H106 O6 N1	912.801	19.686	0.00606885	7.25868e+06	1.11242e+06	973102	8.93007e+07	1.55502e+07	5.64621e+07	4.61486e+07	2.15534e+07	6.14643e+07	5.15539e+07	5.15694e+07	5.21169e+07	5.21136e+07
TG(55:5)+NH4	TG(55:5)+NH4	TG	(55:5)	(55:5)				C58 H106 O6 N1	912.801	19.302	0.00243573	4.27689e+06	1.18179e+06	1.11697e+06	7.54567e+07	5.78375e+06	4.42128e+07	3.20386e+07	1.40085e+07	5.9684e+07	2.65614e+07	3.68425e+07	3.68417e+07	3.66869e+07
TG(19:1/18:2/18:2)+NH4	TG(55:5)+NH4	TG	(19:1/18:2/18:2)	(19:1)	(18:2)	(18:2)		C58 H106 O6 N1	912.801	21.0854	0.0146923	6.90549e+06	1.5429e+06	1.53702e+06	2.41451e+08	7.70559e+06	1.23822e+08	5.02844e+07	2.69518e+07	9.4825e+07	6.31437e+07	8.80129e+07	8.80454e+07	8.5808e+07
TG(19:1/18:1/18:2)+NH4	TG(55:4)+NH4	TG	(19:1/18:1/18:2)	(19:1)	(18:1)	(18:2)		C58 H108 O6 N1	914.817	21.9825	0.00142423	3.06758e+07	2.67003e+06	1.86483e+06	3.89079e+08	33599418	2.62688e+08	2.25381e+08	9.74211e+07	2.27604e+08	1.40349e+08	291621340	2.90817e+08	2.91044e+08
TG(19:0/18:2/18:2)+NH4	TG(55:4)+NH4	TG	(19:0/18:2/18:2)	(19:0)	(18:2)	(18:2)		C58 H108 O6 N1	914.817	21.088	0.0134424	1.48726e+07	1.18612e+06	571175	1.23561e+08	8.299e+06	1.06966e+08	4.11853e+07	2.76729e+07	5.61796e+07	2.6499e+07	5.09224e+07	5.20942e+07	5.08784e+07
PG(46:2)+H	PG(46:2)+H	PG	(46:2)	(46:2)				C52 H100 O10 N0 P1	915.705	15.353	0.00670337	358810			2.35996e+07	1.41087e+06	1.54701e+06	1.22209e+06	170704	1.39851e+06	1.06682e+06	6.33521e+06	6.33523e+06	6.40906e+06
TG(55:3)+NH4	TG(55:3)+NH4	TG	(55:3)	(55:3)				C58 H110 O6 N1	916.833	21.5203	0.00853471	1.43608e+08	1.99498e+07	5.0154e+06	1.09433e+08	1.45023e+08	1.53689e+08	1.89253e+08	1.51275e+08	1.57704e+08	1.99961e+08	1.53847e+08	1.51568e+08	1.53813e+08
TG(19:1/18:1/18:1)+NH4	TG(55:3)+NH4	TG	(19:1/18:1/18:1)	(19:1)	(18:1)	(18:1)		C58 H110 O6 N1	916.833	22.6893	0.0199398	3.61601e+07	2.07386e+06	758774	6.01821e+08	3.67546e+07	2.24051e+08	1.54445e+08	2.8658e+08	5.74541e+08	1.6863e+08	2.45314e+08	2.55177e+08	2.51665e+08
PG(46:1)+H	PG(46:1)+H	PG	(46:1)	(46:1)				C52 H102 O10 N0 P1	917.721	16.382	0.00344549	1.98519e+06	15590.8		6.65015e+07	2.53782e+06	5.5495e+06	3.94755e+06	1.11762e+06	5.26068e+06	3.81518e+06	1.22709e+07	1.21978e+07	1.22709e+07
TG(18:3/18:2/20:4)+NH4	TG(56:9)+NH4	TG	(18:3/18:2/20:4)	(18:3)	(18:2)	(20:4)		C59 H100 O6 N1	918.755	18.0691	0.00887066	710455	714921	514101	2.32666e+07	1.22474e+06	2.63657e+06	2.76501e+06	1.09252e+06	5.66565e+06	2.71819e+06	6.56156e+06	6.56124e+06	6.4611e+06
PE(38:4p)-H	PE(38:4p)-H	PE	(38:4p)	(38:4p)				C43 H77 O7 N1 P1	750.544	12.9405	0.146622	8.38211e+06	8.10819e+06	9.85892e+06	5.55545e+06	8.20388e+06	4.0861e+06	4.61078e+06	8.26732e+06	4.99668e+06	3.71481e+06	1.10366e+07	8.65624e+06	8.62326e+06
TG(19:0/18:1/18:1)+NH4	TG(55:2)+NH4	TG	(19:0/18:1/18:1)	(19:0)	(18:1)	(18:1)		C58 H112 O6 N1	918.848	23.303	0.00475494	2.57142e+07	2.09736e+06	893431	6.13833e+08	2.47348e+07	4.79982e+08	2.68569e+08	2.73853e+08	5.16584e+08	2.78974e+08	3.25579e+08	3.28278e+08	3.28273e+08
TG(19:0/18:1/18:1)+NH4	TG(55:2)+NH4	TG	(19:0/18:1/18:1)	(19:0)	(18:1)	(18:1)		C58 H112 O6 N1	918.848	22.3989	0.00136448	1.22142e+08	2.9438e+07	7.57766e+06	2.36508e+08	1.04172e+08	2.08963e+08	2.46788e+08	2.41403e+08	2.4389e+08	2.40707e+08	2.45426e+08	2.44847e+08	2.44847e+08
TG(18:2/18:2/20:4)+NH4	TG(56:8)+NH4	TG	(18:2/18:2/20:4)	(18:2)	(18:2)	(20:4)		C59 H102 O6 N1	920.77	19.0366	0.00784715	8.65475e+06	721537	286988	2.67426e+08	1.23034e+07	7.19665e+07	3.98045e+07	1.50583e+07	8.21923e+07	4.20802e+07	7.72819e+07	7.62397e+07	7.62422e+07
TG(16:0/18:2/22:6)+NH4	TG(56:8)+NH4	TG	(16:0/18:2/22:6)	(16:0)	(18:2)	(22:6)		C59 H102 O6 N1	920.77	19.582	0.0030585	3.87046e+06	280016	52078.5	2.2215e+08	5.73427e+06	1.84356e+08	1.17734e+08	6.98471e+07	203928601	1.55056e+08	1.16184e+08	1.1557e+08	1.15571e+08
TG(18:3/18:2/20:3)+NH4	TG(56:8)+NH4	TG	(18:3/18:2/20:3)	(18:3)	(18:2)	(20:3)		C59 H102 O6 N1	920.77	18.6619	0.0126147	2.22336e+06	46436	80257.2	4.83305e+07	2.4321e+06	3.56829e+06	9.75375e+06	2.01538e+06	1.8818e+07	9.46149e+06	1.71253e+07	1.75027e+07	1.71263e+07
TG(18:0/18:1/19:0)+NH4	TG(55:1)+NH4	TG	(18:0/18:1/19:0)	(18:0)	(18:1)	(19:0)		C58 H114 O6 N1	920.864	23.8495	0.0542996	1.17839e+07	1.01187e+06	728613	2.44809e+08	1.0268e+07	2.59504e+08	1.40188e+08	1.7366e+08	3.10695e+08	2.04835e+08	1.67945e+08	1.84833e+08	1.84761e+08
TG(55:1)+NH4	TG(55:1)+NH4	TG	(55:1)	(55:1)				C58 H114 O6 N1	920.864	23.0547	0.00622858	1.02012e+08	1.63957e+07	4.78773e+06	2.38931e+08	7.58283e+07	1.06798e+08	184446249	1.97732e+08	2.26715e+08	226607613	1.92505e+08	1.92523e+08	1.90445e+08
TG(18:1/18:2/20:4)+NH4	TG(56:7)+NH4	TG	(18:1/18:2/20:4)	(18:1)	(18:2)	(20:4)		C59 H104 O6 N1	922.786	20.1042	0.00561279	2.88968e+07	8.52456e+06	7.77151e+06	1041625417	3.73408e+07	473185423	3.05506e+08	1.9204e+08	6.52137e+08	3.56403e+08	4.08255e+08	4.12225e+08	4.08232e+08
TG(18:1/18:2/20:3)+NH4	TG(56:6)+NH4	TG	(18:1/18:2/20:3)	(18:1)	(18:2)	(20:3)		C59 H106 O6 N1	924.801	19.4423	0.022464	4.1697e+07	2.01849e+06	545721	3.43543e+08	4.30967e+07	140486656	5.86138e+07	3.90372e+07	1.02455e+08	6.86162e+07	2.4775e+08	237903249	2.3888e+08
PE(18:0p/20:4)-H	PE(38:4p)-H	PE	(18:0p/20:4)	(18:0p)	(20:4)			C43 H77 O7 N1 P1	750.544	12.3367	0.00316128	5.03758e+08	3.91427e+08	446638130	4.4148e+08	4.69189e+08	3.85018e+08	3.64567e+08	4.00687e+08	2.79383e+08	2.42369e+08	3.57857e+08	3.55903e+08	3.57861e+08
TG(18:0/16:0/22:6)+NH4	TG(56:6)+NH4	TG	(18:0/16:0/22:6)	(18:0)	(16:0)	(22:6)		C59 H106 O6 N1	924.801	21.7048	0.0101167	1.85266e+07	1.63144e+06	245480	2.58687e+08	1.18792e+07	4.25025e+08	2.91562e+08	4.23509e+08	4.72324e+08	3.60157e+08	2.7344e+08	2.68716e+08	2.68692e+08
TG(16:0/18:2/22:4)+NH4	TG(56:6)+NH4	TG	(16:0/18:2/22:4)	(16:0)	(18:2)	(22:4)		C59 H106 O6 N1	924.801	21.1049	0.00598403	6.05046e+07	2.76486e+06	1.30596e+06	2685437850	3.40712e+07	470088603	4.58882e+08	2.68789e+08	7.59376e+08	5.43125e+08	4.57496e+08	4.57502e+08	4.62257e+08
TG(18:0/18:1/20:4)+NH4	TG(56:5)+NH4	TG	(18:0/18:1/20:4)	(18:0)	(18:1)	(20:4)		C59 H108 O6 N1	926.817	22.1225	0.00491611	1.21781e+08	8.70922e+06	3.28795e+06	1331221679	7.72224e+07	1434219583	1087508747	8.65703e+08	1851434057	1258903116	1048673835	1057639200	1048694775
TG(20:1/18:2/18:2)+NH4	TG(56:5)+NH4	TG	(20:1/18:2/18:2)	(20:1)	(18:2)	(18:2)		C59 H108 O6 N1	926.817	20.5666	0.0131757	1.09659e+08	7.31702e+06	1.34839e+06	9.75294e+08	1.08079e+08	1.22221e+08	1.45211e+08	1.12238e+08	1.79648e+08	1.64928e+08	3.398e+08	3.47754e+08	3.47591e+08
TG(18:0/16:0/22:5)+NH4	TG(56:5)+NH4	TG	(18:0/16:0/22:5)	(18:0)	(16:0)	(22:5)		C59 H108 O6 N1	926.817	22.3865	0.0036171	2.08323e+07	2.33016e+06	6.43143e+06	4.71167e+07	1.46869e+07	1.84393e+08	1.41631e+08	2.55705e+08	2.20874e+08	1.61952e+08	1.331e+08	1.33102e+08	1.32269e+08
TG(16:0/18:1/22:4)+NH4	TG(56:5)+NH4	TG	(16:0/18:1/22:4)	(16:0)	(18:1)	(22:4)		C59 H108 O6 N1	926.817	21.858	0.0024012	1.74528e+08	1.06269e+07	3.28147e+06	1684021616	1.52904e+08	1635617912	1048177761	7.67639e+08	1586879753	1326069435	1117436183	1112807792	1117461363
TG(16:0/18:1/22:4)+NH4	TG(56:5)+NH4	TG	(16:0/18:1/22:4)	(16:0)	(18:1)	(22:4)		C59 H108 O6 N1	926.817	21.5819	0.0234948	327083924	1.29178e+07	3.52102e+06	2021023488	3.3857e+08	8.30339e+08	4.47179e+08	4.54307e+08	8.82392e+08	5.63382e+08	1134595130	1182095604	1182012651
TG(18:0/16:0/22:4)+NH4	TG(56:4)+NH4	TG	(18:0/16:0/22:4)	(18:0)	(16:0)	(22:4)		C59 H110 O6 N1	928.833	22.3865	0.0574373	4.38628e+08	1.89188e+07	2.04838e+06	1179377992	4.56713e+08	5.00258e+08	2.66766e+08	2.35366e+08	3.25428e+08	2.91943e+08	5.95838e+08	5.40411e+08	5.40086e+08
TG(18:0/16:0/22:4)+NH4	TG(56:4)+NH4	TG	(18:0/16:0/22:4)	(18:0)	(16:0)	(22:4)		C59 H110 O6 N1	928.833	22.6713	0.00588984	4.18145e+07	6.66487e+06	3.6337e+06	3.52637e+08	2.74718e+07	2.83953e+08	2.10919e+08	1556462836	3.83951e+08	2.37866e+08	2.41071e+08	2.43565e+08	2.43529e+08
TG(18:0/18:2/20:1)+NH4	TG(56:3)+NH4	TG	(18:0/18:2/20:1)	(18:0)	(18:2)	(20:1)		C59 H112 O6 N1	930.848	22.9423	0.0109849	3.3298e+08	1.57487e+07	7.0438e+06	1294555556	3.23657e+08	4.55615e+08	2.92729e+08	3.23995e+08	4.10094e+08	2.65428e+08	4.80157e+08	4.80154e+08	4.71078e+08
PE(38:4p)-H	PE(38:4p)-H	PE	(38:4p)	(38:4p)				C43 H77 O7 N1 P1	750.544	12.0427	0.298243	1.73594e+08	1.71882e+08	1.76516e+08	1.09571e+08	1.98329e+08	1.52653e+08	161295809	1.51791e+08	1.16655e+08	9.38715e+07	9.83582e+07	5.49848e+07	9.82578e+07
TG(18:0/18:1/20:1)+NH4	TG(56:2)+NH4	TG	(18:0/18:1/20:1)	(18:0)	(18:1)	(20:1)		C59 H114 O6 N1	932.864	23.5482	0.0515832	1.4229e+08	7.2129e+06	4.87146e+06	1147887878	1.32355e+08	1141385910	5.55328e+08	6.65247e+08	9.66055e+08	5.34306e+08	6.7528e+08	6.76166e+08	7.37944e+08
TG(18:0/18:1/20:0)+NH4	TG(56:1)+NH4	TG	(18:0/18:1/20:0)	(18:0)	(18:1)	(20:0)		C59 H116 O6 N1	934.88	24.0902	0.00203637	4.04944e+07	3.92527e+06	4.32855e+06	7.68766e+08	3.80836e+07	8.74816e+08	3.79524e+08	5.94489e+08	846466456	3.60185e+08	4.56985e+08	4.56989e+08	4.55377e+08
TG(18:0/18:0/20:0)+NH4	TG(56:0)+NH4	TG	(18:0/18:0/20:0)	(18:0)	(18:0)	(20:0)		C59 H118 O6 N1	936.895	24.5481	0.00316177	7.4583e+06	1.4755e+06	1.17234e+06	1.04453e+08	6.76432e+06	6.73084e+07	5.65574e+07	5.80488e+07	5.6658e+07	4.00496e+07	6.31834e+07	6.284e+07	6.28374e+07
TG(57:4)+NH4	TG(57:4)+NH4	TG	(57:4)	(57:4)				C60 H112 O6 N1	942.848	21.594	0.00558386	5.56655e+07	9.18215e+06	2.01099e+06	1.85997e+08	8.35123e+07	9.05885e+07	8.57978e+07	8.92877e+07	9.53158e+07	1.07235e+08	1.23977e+08	1.23976e+08	1.22781e+08
TG(18:1/18:2/21:1)+NH4	TG(57:4)+NH4	TG	(18:1/18:2/21:1)	(18:1)	(18:2)	(21:1)		C60 H112 O6 N1	942.848	22.115	0.0376975	7.36463e+06	1.06016e+06	1.06072e+06	7.47868e+07	6.61339e+06	2.97751e+07	3.65879e+07	2.52458e+07	4.01379e+07	4.55117e+07	3.56441e+07	3.798e+07	3.55649e+07
TG(18:2/18:2/22:6)+NH4	TG(58:10)+NH4	TG	(18:2/18:2/22:6)	(18:2)	(18:2)	(22:6)		C61 H102 O6 N1	944.77	18.4926	0.0132681	611038	451225	562470	5.0713e+07	873732	8.18688e+06	7.09597e+06	4.56336e+06	9.11421e+06	8.06053e+06	1.14404e+07	1.17075e+07	1.17074e+07
TG(18:1/18:1/21:1)+NH4	TG(57:3)+NH4	TG	(18:1/18:1/21:1)	(18:1)	(18:1)	(21:1)		C60 H114 O6 N1	944.864	22.406	0.030905	7.16876e+07	1.00074e+07	4.62163e+06	1.0618e+08	5.70982e+07	8.56731e+07	5.3707e+07	9.41373e+07	7.54917e+07	4.71569e+07	8.27815e+07	7.82496e+07	7.88096e+07
TG(18:1/18:2/22:6)+NH4	TG(58:9)+NH4	TG	(18:1/18:2/22:6)	(18:1)	(18:2)	(22:6)		C61 H104 O6 N1	946.786	19.5957	0.00172678	3.03055e+06	795687	511007	1.15398e+08	4.29469e+06	1.02921e+08	5.61743e+07	3.23315e+07	1.1145e+08	6.87526e+07	6.11573e+07	6.09746e+07	6.09749e+07
TG(22:5/18:2/18:2)+NH4	TG(58:9)+NH4	TG	(22:5/18:2/18:2)	(22:5)	(18:2)	(18:2)		C61 H104 O6 N1	946.786	19.0005	0.00291797	2.87335e+06	633896	538648	1.27639e+08	4.14222e+06	7.13874e+06	5.14731e+06	2.71177e+06	2.81799e+07	6.69198e+06	2.38277e+07	2.37075e+07	2.38278e+07
TG(16:0/18:1/23:0)+NH4	TG(57:1)+NH4	TG	(16:0/18:1/23:0)	(16:0)	(18:1)	(23:0)		C60 H118 O6 N1	948.895	24.3207	0.00492205	3.45488e+06	988734	1.26938e+06	6.84204e+07	4.77135e+06	9.14472e+07	3.69621e+07	3.78265e+07	8.41644e+07	4.3259e+07	3.80153e+07	3.81987e+07	3.78245e+07
PE(38:2p)-H	PE(38:2p)-H	PE	(38:2p)	(38:2p)				C43 H81 O7 N1 P1	754.576	13.4179	0.0213345	2.19498e+06	2.49448e+06	2.33109e+06	1.98917e+06	1.30497e+06	3.44989e+06	2.6645e+06	1.74863e+06	1.37435e+06	1.7581e+06	1.51954e+06	1.51964e+06	1.46412e+06
PE(49:1)+Na	PE(49:1)+Na	PE	(49:1)	(49:1)				C54 H106 O8 N1 P1 Na1	950.755	22.38	0.168127	2.04531e+07	3.62846e+06	380706	4.66135e+07	2.99595e+07	3.79583e+07	4.2625e+07	3.21218e+07	4.13661e+07	2.42965e+07	3.19548e+07	3.18264e+07	2.34262e+07
TG(18:1/18:2/22:4)+NH4	TG(58:7)+NH4	TG	(18:1/18:2/22:4)	(18:1)	(18:2)	(22:4)		C61 H108 O6 N1	950.817	21.0068	0.0217904	2.2033e+07	1.67336e+06	960126	5.50075e+08	2.67094e+07	2.11587e+08	9.91019e+07	1.69936e+08	5.07712e+08	3.15989e+08	1.98188e+08	2.03021e+08	2.0701e+08
TG(18:0/16:0/23:0)+NH4	TG(57:0)+NH4	TG	(18:0/16:0/23:0)	(18:0)	(16:0)	(23:0)		C60 H120 O6 N1	950.911	23.547	0.00544625	2.08535e+08	2.37002e+07	2.44974e+06	4.52118e+08	1.16883e+08	4.0843e+08	5.81085e+08	4.15035e+08	4.22493e+08	4.43542e+08	4.88362e+08	4.86843e+08	4.83209e+08
TG(18:1/18:1/22:4)+NH4	TG(58:6)+NH4	TG	(18:1/18:1/22:4)	(18:1)	(18:1)	(22:4)		C61 H110 O6 N1	952.833	21.9134	0.00689505	9.65095e+07	2.03553e+06	1.50142e+06	989149518	3.77703e+07	3.11779e+08	1.98629e+08	1.90856e+08	4.30777e+08	2.27825e+08	2.9511e+08	298654427	2.98671e+08
TG(18:0/18:1/22:4)+NH4	TG(58:5)+NH4	TG	(18:0/18:1/22:4)	(18:0)	(18:1)	(22:4)		C61 H112 O6 N1	954.848	22.6525	0.00256287	5.1702e+07	4.19424e+06	2.45164e+06	3.46282e+08	3.76744e+07	2.04966e+08	2.26371e+08	1.41984e+08	2.66769e+08	1.6775e+08	2.0017e+08	2.01142e+08	2.00365e+08
TG(18:0/18:0/22:4)+NH4	TG(58:4)+NH4	TG	(18:0/18:0/22:4)	(18:0)	(18:0)	(22:4)		C61 H114 O6 N1	956.864	23.3071	0.0326288	1.61607e+07	1.8637e+06	756673	1.40032e+08	9.43027e+06	6.64013e+07	4.73367e+07	6.8333e+07	9.80554e+07	8.19879e+07	7.97086e+07	7.95969e+07	8.42397e+07
TG(20:1/18:1/20:1)+NH4	TG(58:3)+NH4	TG	(20:1/18:1/20:1)	(20:1)	(18:1)	(20:1)		C61 H116 O6 N1	958.88	23.5391	0.0115741	2.58513e+07	2.78866e+06	1.30753e+06	2.24726e+08	3.92597e+07	1.21844e+08	6.52681e+07	5.37787e+07	1.01274e+08	6.68194e+07	9.90123e+07	9.90182e+07	101013560
TG(16:0/18:2/24:0)+NH4	TG(58:2)+NH4	TG	(16:0/18:2/24:0)	(16:0)	(18:2)	(24:0)		C61 H118 O6 N1	960.895	24.0803	0.0118038	2.15046e+07	1.13974e+06	4.43463e+06	1.43527e+08	2.27665e+07	2.89641e+08	1.09229e+08	1.45047e+08	2.47447e+08	1.23188e+08	1.16088e+08	1.16115e+08	1.13744e+08
TG(16:0/18:1/24:0)+NH4	TG(58:1)+NH4	TG	(16:0/18:1/24:0)	(16:0)	(18:1)	(24:0)		C61 H120 O6 N1	962.911	24.537	0.00581434	1.08508e+07	1.31474e+06	2.06223e+06	2.06608e+08	1.51499e+07	152990906	1.0033e+08	1.131e+08	2.45998e+08	1.0445e+08	1.03353e+08	102310884	1.03344e+08
TG(18:0/16:0/24:0)+NH4	TG(58:0)+NH4	TG	(18:0/16:0/24:0)	(18:0)	(16:0)	(24:0)		C61 H122 O6 N1	964.927	23.646	0.00411465	5.40823e+08	5.27516e+07	2.94574e+07	1220841810	2.84508e+08	1076551872	1414845517	1080674694	8.61692e+08	1207790402	1317781927	1316065980	1307679171
SM(d35:2)+HCOO	SM(d35:2)+HCOO	SM	(d35:2)	(d35:2)				C41 H80 O8 N2 P1	759.566	10.0372	0.00551735	2.01186e+06	2.25259e+06	2.22054e+06	1.47921e+06	3.59138e+06	913600	330880	1.93677e+06	1.2525e+06	466877	1.47853e+06	1.46451e+06	1.46447e+06
TG(25:0/16:0/18:1)+NH4	TG(59:1)+NH4	TG	(25:0/16:0/18:1)	(25:0)	(16:0)	(18:1)		C62 H122 O6 N1	976.927	23.586	0.00830881	1.23693e+08	1.22645e+07	2.31632e+06	4.23708e+08	9.22741e+07	5.34707e+08	3.53124e+08	5.07758e+08	6.086e+08	4.05341e+08	368553663	3.68695e+08	3.73954e+08
TG(25:0/16:0/18:1)+NH4	TG(59:1)+NH4	TG	(25:0/16:0/18:1)	(25:0)	(16:0)	(18:1)		C62 H122 O6 N1	976.927	24.7338	0.00523248	1.2369e+06	23412.1	82993.1	3.35493e+07	1.91628e+06	1.71223e+07	1.09996e+07	1.27333e+07	2.62005e+07	9.8163e+06	1.2136e+07	1.22453e+07	1.2134e+07
TG(18:1/20:2/22:4)+NH4	TG(60:7)+NH4	TG	(18:1/20:2/22:4)	(18:1)	(20:2)	(22:4)		C63 H112 O6 N1	978.848	21.9109	0.0164617	9.09977e+06	118668	137037	5.21553e+07	5.38873e+06	2.18114e+07	2.48121e+07	5.65174e+06	4.42936e+07	8.49566e+06	2.19283e+07	2.25705e+07	2.25607e+07
TG(18:1/18:2/24:0)+NH4	TG(60:3)+NH4	TG	(18:1/18:2/24:0)	(18:1)	(18:2)	(24:0)		C63 H120 O6 N1	986.911	24.1044	0.00718835	5.98325e+06	997211	671192	1.37266e+08	1.09094e+07	3.68459e+07	1.82156e+07	2.57966e+07	4.61178e+07	3.41498e+07	3.42729e+07	3.38462e+07	3.38533e+07
TG(18:1/18:1/24:0)+NH4	TG(60:2)+NH4	TG	(18:1/18:1/24:0)	(18:1)	(18:1)	(24:0)		C63 H122 O6 N1	988.927	24.5471	0.00283767	6.1024e+06	515736	526935	1.49233e+08	8.21045e+06	5.04689e+07	2.97983e+07	3.36795e+07	8.07264e+07	2.91432e+07	4.43432e+07	44343766	4.41259e+07
TG(26:0/16:0/18:1)+NH4	TG(60:1)+NH4	TG	(26:0/16:0/18:1)	(26:0)	(16:0)	(18:1)		C63 H124 O6 N1	990.942	24.9139	0.00215187	2.25767e+06	142502	224639	5.92646e+07	3.9959e+06	2.24879e+07	1.66371e+07	2.2464e+07	4.26434e+07	1.26521e+07	2.10407e+07	2.09779e+07	2.0953e+07
TG(26:0/16:0/18:0)+NH4	TG(60:0)+NH4	TG	(26:0/16:0/18:0)	(26:0)	(16:0)	(18:0)		C63 H126 O6 N1	992.958	25.2753	0.0192558	777079	90369.4	101925	1.19694e+07	979362	3.54105e+06	4.13024e+06	3.51603e+06	4.30547e+06	2.37344e+06	4.70775e+06	4.8645e+06	4.7039e+06
TG(28:0/16:0/18:1)+NH4	TG(62:1)+NH4	TG	(28:0/16:0/18:1)	(28:0)	(16:0)	(18:1)		C65 H128 O6 N1	1018.97	25.2625	0.00987933	285320	31297		2.0955e+07	1.00368e+06	3.13856e+06	2.70354e+06	3.24705e+06	7.37489e+06	1.6716e+06	4.48263e+06	4.55927e+06	4.48165e+06
CerG3(d18:1/16:0)+H	CerG3(d34:1)+H	CerG3	(d18:1/16:0)	(d18:1)	(16:0)			C52 H98 O18 N1	1024.68	10.2155	0.00437696	2.424e+06	3.87464e+06	4.3245e+06	2.2535e+06	3.36944e+06	9.27337e+06	8.23914e+06	4.83388e+06	6.62739e+06	3.21109e+06	4.54333e+06	4.50895e+06	4.54328e+06
TG(30:0/16:0/18:2)+NH4	TG(64:2)+NH4	TG	(30:0/16:0/18:2)	(30:0)	(16:0)	(18:2)		C67 H130 O6 N1	1044.99	25.2914	0.00857403	251478			3.03018e+07	1.25191e+06	1.20044e+06	1.51075e+06	1.09714e+06	4.38886e+06	879905	4.75495e+06	4.82582e+06	4.75476e+06
PS(18:0/16:1)-H	PS(34:1)-H	PS	(18:0/16:1)	(18:0)	(16:1)			C40 H75 O10 N1 P1	760.513	10.7206	0.0686818	3.87128e+06	3.59594e+06	3.81569e+06	1.62479e+06	3.15577e+06	7.01362e+06	3.73887e+06	3.68262e+06	3.25304e+06	3.21768e+06	3.51254e+06	3.12448e+06	3.54206e+06
TG(30:0/18:1/18:1)+NH4	TG(66:2)+NH4	TG	(30:0/18:1/18:1)	(30:0)	(18:1)	(18:1)		C69 H134 O6 N1	1073.02	25.5937	0.0109333	92631.3			1.59707e+07	459574	792541	566010	615211	2.03221e+06	367214	2.76555e+06	2.76555e+06	2.71351e+06
CerG3(d18:1/22:0)+H	CerG3(d40:1)+H	CerG3	(d18:1/22:0)	(d18:1)	(22:0)			C58 H110 O18 N1	1108.77	13.1915	0.00187105	3.18083e+06	4.04612e+06	3.14036e+06	2.98032e+06	3.22716e+06	8.23507e+06	9.12588e+06	4.79577e+06	5.51874e+06	3.13151e+06	4.77169e+06	4.78958e+06	4.78064e+06
CerG3(d18:1/24:1)+H	CerG3(d42:2)+H	CerG3	(d18:1/24:1)	(d18:1)	(24:1)			C60 H112 O18 N1	1134.79	13.1131	0.00199714	3.33353e+06	5.20797e+06	4.56544e+06	2.38079e+06	4.03647e+06	9.28296e+06	9.20024e+06	6.79999e+06	7.35756e+06	4.17374e+06	5.43076e+06	5.41195e+06	5.43067e+06
CerG3(d18:1/24:0)+H	CerG3(d42:1)+H	CerG3	(d18:1/24:0)	(d18:1)	(24:0)			C60 H114 O18 N1	1136.8	14.2594	0.00206983	3.31148e+06	4.29193e+06	3.46963e+06	2.75117e+06	3.93282e+06	6.47231e+06	8.59536e+06	4.81557e+06	4.42916e+06	3.59131e+06	4.38409e+06	4.38413e+06	4.36841e+06
GM3(d34:1)+H	GM3(d34:1)+H	GM3	(d34:1)	(d34:1)				C57 H105 O21 N2	1153.72	9.10616	0.0156741	536910	762357	1.55338e+06	521575	936962	1.19368e+06	818434	501640	682273	491042	850563	827656	850516
CerG3GNAc1(d40:1)+H	CerG3GNAc1(d40:1)+H	CerG3GNAc1	(d40:1)	(d40:1)				C66 H123 O23 N2	1311.85	12.8403	0.00533468	1.06929e+07	1.02585e+07	1.09486e+07	8.64007e+06	1.09243e+07	1.468e+07	1.20985e+07	1.01432e+07	9.07657e+06	4.3443e+06	9.99785e+06	9.90557e+06	9.99747e+06
CerG3GNAc1(d42:3)+H	CerG3GNAc1(d42:3)+H	CerG3GNAc1	(d42:3)	(d42:3)				C68 H123 O23 N2	1335.85	11.933	0.0577753	5.15261e+06	7.54065e+06	7.83924e+06	3.00397e+06	7.20952e+06	2.95106e+06	3.09896e+06	4.76316e+06	2.70253e+06	1.26905e+06	3.86505e+06	3.86161e+06	4.26326e+06
CerG3GNAc1(d42:2)+H	CerG3GNAc1(d42:2)+H	CerG3GNAc1	(d42:2)	(d42:2)				C68 H125 O23 N2	1337.87	12.7745	0.0191341	1.34787e+07	1.77176e+07	1.72191e+07	9.57905e+06	1.64224e+07	1.44409e+07	1.23756e+07	1.51374e+07	1.28243e+07	5.92706e+06	1.34107e+07	1.34096e+07	1.29706e+07
CerG3GNAc1(d42:1)+H	CerG3GNAc1(d42:1)+H	CerG3GNAc1	(d42:1)	(d42:1)				C68 H127 O23 N2	1339.88	13.8666	0.00899665	1.38965e+07	1.30412e+07	1.20099e+07	1.12012e+07	1.42766e+07	1.17262e+07	1.22277e+07	1.12096e+07	8.87254e+06	5.1121e+06	1.08688e+07	1.10387e+07	1.08681e+07
PC(16:0p/16:1)+HCOO	PC(32:1p)+HCOO	PC	(16:0p/16:1)	(16:0p)	(16:1)			C41 H79 O9 N1 P1	760.55	11.1475	0.0115469	1.07277e+07	11543150	8.36739e+06	4.93352e+06	1.01119e+07	6.78623e+06	8.26281e+06	8.51736e+06	7.49663e+06	5.90914e+06	7.14496e+06	7.28973e+06	7.28985e+06
LPE(22:4)-H	LPE(22:4)-H	LPE	(22:4)	(22:4)				C27 H47 O7 N1 P1	528.31	2.86233	0.0211622	842046	785010	890222	930353	1.2397e+06	1.70328e+06	1.34514e+06	1.30509e+06	1.1007e+06	987898	1.1415e+06	1.18335e+06	1.14054e+06
SM(d34:2+hO)+HCOO	SM(d34:2+hO)+HCOO	SM	(d34:2+hO)	(d34:2+hO)				C40 H78 O9 N2 P1	761.545	9.04367	0.0101475	4.61276e+06	4.39122e+06	1.69837e+06	2.0048e+06	5.99181e+06	667399	750744	4.29038e+06	2.60648e+06	701510	2.36388e+06	2.32282e+06	2.3228e+06
SM(d35:1)+HCOO	SM(d35:1)+HCOO	SM	(d35:1)	(d35:1)				C41 H82 O8 N2 P1	761.581	11.0108	0.00692657	1.61636e+07	1.83122e+07	1.50087e+07	1.35208e+07	2.1436e+07	1.49703e+07	1.27589e+07	1.66466e+07	1.6458e+07	7.21166e+06	1.39171e+07	1.40848e+07	1.39171e+07
PC(16:0p/16:0)+HCOO	PC(32:0p)+HCOO	PC	(16:0p/16:0)	(16:0p)	(16:0)			C41 H81 O9 N1 P1	762.565	11.9456	0.00259657	2.51284e+07	2.8374e+07	2.24464e+07	1.39375e+07	2.56638e+07	2.14038e+07	2.74984e+07	2.41941e+07	1.66969e+07	1.62802e+07	2.06209e+07	2.06214e+07	2.0714e+07
SM(d34:1+pO)+HCOO	SM(d34:1+pO)+HCOO	SM	(d34:1+pO)	(d34:1+pO)				C40 H80 O9 N2 P1	763.561	10.095	0.00498167	2.43461e+07	2.4359e+07	1.16373e+07	2.009e+07	2.33704e+07	1.31954e+07	1.56058e+07	2.97094e+07	2.60223e+07	8.68859e+06	1.81466e+07	1.79905e+07	1.79913e+07
PE(18:1/20:4)-H	PE(38:5)-H	PE	(18:1/20:4)	(18:1)	(20:4)			C43 H75 O8 N1 P1	764.524	10.9526	0.00244428	1.55153e+07	1.75864e+07	1.70585e+07	1.24792e+07	1.88389e+07	3.37329e+07	2.60122e+07	2.15591e+07	2.40166e+07	1.5204e+07	1.92526e+07	1.91714e+07	1.91713e+07
PE(16:0/22:5)-H	PE(38:5)-H	PE	(16:0/22:5)	(16:0)	(22:5)			C43 H75 O8 N1 P1	764.524	11.2561	0.0109722	3.31987e+06	4.22402e+06	3.83964e+06	2.21884e+06	4.46042e+06	8.07083e+06	7.37499e+06	6.48891e+06	5.45598e+06	4.60435e+06	5.10529e+06	5.0083e+06	5.1041e+06
PC(16:0e/16:0)+HCOO	PC(32:0e)+HCOO	PC	(16:0e/16:0)	(16:0e)	(16:0)			C41 H83 O9 N1 P1	764.581	12.0829	0.0145946	9.14012e+06	6.08955e+06	7.04708e+06	4.76698e+06	7.03422e+06	2.04631e+07	1.42362e+07	1.07826e+07	1.04358e+07	1.01638e+07	1.01503e+07	9.89656e+06	9.89944e+06
SM(d34:0+pO)+HCOO	SM(d34:0+pO)+HCOO	SM	(d34:0+pO)	(d34:0+pO)				C40 H82 O9 N2 P1	765.576	10.4973	0.00776181	3.34774e+06	3.294e+06	1.39074e+06	3.05705e+06	2.12689e+06	2.56507e+06	3.76509e+06	3.83033e+06	6.05284e+06	1.62623e+06	2.94429e+06	2.90489e+06	2.9443e+06
PE(18:0/20:4)-H	PE(38:4)-H	PE	(18:0/20:4)	(18:0)	(20:4)			C43 H77 O8 N1 P1	766.539	11.8544	0.00126856	2.73805e+08	3.26837e+08	302501161	1.8489e+08	2.72759e+08	3.13574e+08	2.83217e+08	2.81836e+08	2.756e+08	1.78206e+08	2.48793e+08	2.4934e+08	2.4934e+08
PE(16:0/22:4)-H	PE(38:4)-H	PE	(16:0/22:4)	(16:0)	(22:4)			C43 H77 O8 N1 P1	766.539	11.5336	0.00705593	1.02531e+07	1.11364e+07	9.49504e+06	6.04149e+06	1.16614e+07	1.12629e+07	1.17988e+07	9.67298e+06	8.19231e+06	6.69696e+06	9.2864e+06	9.28647e+06	9.40039e+06
Cer(d18:2/16:0)-H	Cer(d34:2)-H	Cer	(d18:2/16:0)	(d18:2)	(16:0)			C34 H64 O3 N1	534.489	10.8423	0.0128882	4.26659e+06	3.90306e+06	5.32907e+06	1.94674e+06	3.54499e+06	2.87334e+06	2.85569e+06	5.79009e+06	4.98295e+06	3.73188e+06	3.54118e+06	3.46339e+06	3.46319e+06
PS(36:3p)-H	PS(36:3p)-H	PS	(36:3p)	(36:3p)				C42 H75 O9 N1 P1	768.518	12.3548	0.00807269	1.20886e+07	1.44286e+07	1.71629e+07	1.02983e+07	2.0274e+07	1.37548e+07	1.62428e+07	1.86961e+07	1.14066e+07	8.06159e+06	1.30463e+07	1.28648e+07	1.30465e+07
PE(18:0/20:3)-H	PE(38:3)-H	PE	(18:0/20:3)	(18:0)	(20:3)			C43 H79 O8 N1 P1	768.555	12.5757	0.00345655	2.11736e+07	1.72968e+07	1.74571e+07	7.95805e+06	2.38553e+07	1.44642e+07	8.52363e+06	2.8069e+07	1.26397e+07	1.0445e+07	1.41936e+07	1.41232e+07	1.42174e+07
PE(18:0/20:3)-H	PE(38:3)-H	PE	(18:0/20:3)	(18:0)	(20:3)			C43 H79 O8 N1 P1	768.555	12.2612	0.014076	1.92278e+07	2.11743e+07	2.04207e+07	1.73091e+07	2.75547e+07	4.4289e+07	3.3842e+07	2.49495e+07	2.48032e+07	2.27549e+07	2.49512e+07	2.43465e+07	2.49485e+07
PE(18:0/20:2)-H	PE(38:2)-H	PE	(18:0/20:2)	(18:0)	(20:2)			C43 H81 O8 N1 P1	770.571	12.8993	0.011914	5.25293e+06	5.73002e+06	7.82235e+06	4.74453e+06	1.03518e+07	1.00002e+07	6.18987e+06	6.60201e+06	3.73311e+06	4.05092e+06	5.18646e+06	5.18665e+06	5.08026e+06
PE(18:1p/22:6)-H	PE(40:7p)-H	PE	(18:1p/22:6)	(18:1p)	(22:6)			C45 H75 O7 N1 P1	772.529	11.12	0.00257169	9.33168e+06	1.24633e+07	9.26025e+06	6.99286e+06	8.66983e+06	3.04798e+07	1.94337e+07	2.18497e+07	1.63766e+07	1.16707e+07	1.29553e+07	1.29552e+07	1.30131e+07
PE(18:0/20:1)-H	PE(38:1)-H	PE	(18:0/20:1)	(18:0)	(20:1)			C43 H83 O8 N1 P1	772.586	13.8248	0.00366725	2.42877e+06	2.43322e+06	3.65085e+06	2.23521e+06	3.7619e+06	2.77542e+06	2.46156e+06	2.7203e+06	2.15164e+06	1.30114e+06	2.41032e+06	2.42561e+06	2.41021e+06
PE(38:1)-H	PE(38:1)-H	PE	(38:1)	(38:1)				C43 H83 O8 N1 P1	772.586	12.5048	0.014917	2.49052e+06	2.9066e+06	3.06485e+06	2.2712e+06	2.90237e+06	3.1914e+06	1.95157e+06	2.68193e+06	2.34214e+06	1.25722e+06	2.39344e+06	2.45698e+06	2.45573e+06
PG(18:1/18:1)-H	PG(36:2)-H	PG	(18:1/18:1)	(18:1)	(18:1)			C42 H78 O10 N0 P1	773.534	10.7032	0.0230699	5.18021e+06	6.57922e+06	5.23953e+06	2.28234e+06	4.53634e+06	1.56118e+07	6.66805e+06	5.01291e+06	6.23445e+06	2.19238e+06	4.28321e+06	4.28399e+06	4.45707e+06
SM(d18:1/18:1)+HCOO	SM(d36:2)+HCOO	SM	(d18:1/18:1)	(d18:1)	(18:1)			C42 H82 O8 N2 P1	773.581	10.605	0.0128412	2.39407e+07	1.76949e+07	2.11641e+07	1.51281e+07	2.4325e+07	1.13186e+07	1.03772e+07	1.68685e+07	1.17578e+07	8.71386e+06	1.46335e+07	1.49628e+07	1.49648e+07
PE(18:0p/22:6)-H	PE(40:6p)-H	PE	(18:0p/22:6)	(18:0p)	(22:6)			C45 H77 O7 N1 P1	774.544	12.0314	0.00314463	1.25338e+07	1.05466e+07	1.07418e+07	1.25186e+07	1.25109e+07	2.99052e+07	2.06361e+07	2.1638e+07	1.47966e+07	1.20073e+07	1.39816e+07	1.39813e+07	1.40578e+07
Cer(d18:1/16:0)-H	Cer(d34:1)-H	Cer	(d18:1/16:0)	(d18:1)	(16:0)			C34 H66 O3 N1	536.505	11.7673	0.0257841	1.17522e+07	1.16794e+07	1.17819e+07	1.0691e+07	9.47065e+06	1.37864e+07	1.88206e+07	1.75682e+07	1.82602e+07	1.59858e+07	1.38619e+07	1.45147e+07	1.44841e+07

## Sheet: Table S4
gene_id	gene_name	transcript_id	GO	KEGG	KO_ENTRY	EC	Description	trans_type	FPKM.HFCF_1	FPKM.HFCF_2	FPKM.HFCF_3	FPKM.NC_1	FPKM.NC_2	FPKM.NC_3	fc	log2(fc)	pval	qval	regulation	significant
ENSSSCG00000009755	AACS	ENSSSCT00000010695;ENSSSCT00000068412;ENSSSCT00000079199	GO:0000166(nucleotide binding);GO:0003824(catalytic activity);GO:0005524(ATP binding);GO:0005737(cytoplasm);GO:0005829(cytosol);GO:0006629(lipid metabolic process);GO:0006631(fatty acid metabolic process);GO:0016874(ligase activity);GO:0030729(acetoacetate-CoA ligase activity);GO:0032024(positive regulation of insulin secretion);GO:0032024(positive regulation of insulin secretion)	00280(Valine, leucine and isoleucine degradation);00650(Butanoate metabolism);00650(Butanoate metabolism)	K01907	EC:6.2.1.16	acetoacetyl-CoA synthetase [Source:VGNC Symbol;Acc:VGNC:84937]	protein_coding	2.47121	3.95125	4.67641	7.90509	7.24583	13.0524	0.39353	-1.34545	3.01118e-06	5.08349e-05	down	yes
ENSSSCG00000005423	ABCA1	ENSSSCT00000005966	GO:0000166(nucleotide binding);GO:0002790(peptide secretion);GO:0005102(signaling receptor binding);GO:0005319(lipid transporter activity);GO:0005524(ATP binding);GO:0005548(phospholipid transporter activity);GO:0005768(endosome);GO:0005794(Golgi apparatus);GO:0005886(plasma membrane);GO:0005887(integral component of plasma membrane);GO:0006497(protein lipidation);GO:0006869(lipid transport);GO:0…	02010(ABC transporters);04975(Fat digestion and absorption);04979(Cholesterol metabolism)	K05641	NA	ATP binding cassette subfamily A member 1 [Source:VGNC Symbol;Acc:VGNC:84947]	protein_coding	13.2976	11.0135	10.4593	0.872014	0.718048	0.598359	15.8883	3.9899	1.47943e-31	2.25892e-28	up	yes
ENSSSCG00000006890	ABCA4	ENSSSCT00000007545;ENSSSCT00000067947	GO:0000166(nucleotide binding);GO:0001750(photoreceptor outer segment);GO:0005319(lipid transporter activity);GO:0005524(ATP binding);GO:0005548(phospholipid transporter activity);GO:0005783(endoplasmic reticulum);GO:0005887(integral component of plasma membrane);GO:0006649(phospholipid transfer to membrane);GO:0006869(lipid transport);GO:0007601(visual perception);GO:0016020(membrane);GO:0016021…	02010(ABC transporters);02010(ABC transporters)	K05644	NA	ATP binding cassette subfamily A member 4 [Source:VGNC Symbol;Acc:VGNC:84948]	protein_coding	0.0197517	0.0386729	0.110685	0.251277	0.17328	0.0699288	0.341991	-1.54797	0.0291204	0.0909558	down	yes
ENSSSCG00000010188	ABCB10	ENSSSCT00000011154	GO:0000166(nucleotide binding);GO:0005524(ATP binding);GO:0005739(mitochondrion);GO:0005743(mitochondrial inner membrane);GO:0016020(membrane);GO:0016021(integral component of membrane);GO:0016887(ATPase activity);GO:0032592(integral component of mitochondrial membrane);GO:0042626(ATPase-coupled transmembrane transporter activity);GO:0042802(identical protein binding);GO:0055085(transmembrane tra…	02010(ABC transporters)	K05657	NA	ATP binding cassette subfamily B member 10 [Source:NCBI gene (formerly Entrezgene);Acc:100153026]	protein_coding	26.6091	14.832	13.8795	2.82304	4.86931	3.80982	4.80958	2.26591	2.24223e-08	6.52812e-07	up	yes
ENSSSCG00000012424	ABCB7	ENSSSCT00000038920;ENSSSCT00000086510;ENSSSCT00000033898;ENSSSCT00000013585;ENSSSCT00000073102;ENSSSCT00000069007;ENSSSCT00000036440	GO:0000166(nucleotide binding);GO:0005524(ATP binding);GO:0005743(mitochondrial inner membrane);GO:0006879(cellular iron ion homeostasis);GO:0016020(membrane);GO:0016021(integral component of membrane);GO:0016887(ATPase activity);GO:0042626(ATPase-coupled transmembrane transporter activity);GO:0055085(transmembrane transport);GO:0055085(transmembrane transport)	02010(ABC transporters);02010(ABC transporters)	K05662	NA	ATP binding cassette subfamily B member 7 [Source:VGNC Symbol;Acc:VGNC:97855]	protein_coding	3.04483	2.33853	2.01428	0.953699	1.29126	1.09234	2.21665	1.14838	0.0317931	0.097154	up	yes
ENSSSCG00000011782	ABCC5	ENSSSCT00000042585;ENSSSCT00000012894;ENSSSCT00000055151;ENSSSCT00000042944;ENSSSCT00000058494	GO:0000166(nucleotide binding);GO:0005524(ATP binding);GO:0005886(plasma membrane);GO:0008514(organic anion transmembrane transporter activity);GO:0015562(efflux transmembrane transporter activity);GO:0015711(organic anion transport);GO:0016020(membrane);GO:0016021(integral component of membrane);GO:0016323(basolateral plasma membrane);GO:0016324(apical plasma membrane);GO:0016887(ATPase activity…	01523(Antifolate resistance);02010(ABC transporters);02010(ABC transporters)	K05668	NA	ATP binding cassette subfamily C member 5 [Source:VGNC Symbol;Acc:VGNC:84958]	protein_coding	17.1859	11.0794	8.19431	4.13764	5.56913	5.94473	2.32946	1.22	0.00455815	0.0222753	up	yes
ENSSSCG00000009043	ABCE1	ENSSSCT00000009903;ENSSSCT00000076692;ENSSSCT00000076296	GO:0000054(ribosomal subunit export from nucleus);GO:0000166(nucleotide binding);GO:0005506(iron ion binding);GO:0005524(ATP binding);GO:0005737(cytoplasm);GO:0005739(mitochondrion);GO:0005829(cytosol);GO:0006413(translational initiation);GO:0006415(translational termination);GO:0016887(ATPase activity);GO:0043024(ribosomal small subunit binding);GO:0060698(endoribonuclease inhibitor activity);GO…	NA	K06174	NA	ATP binding cassette subfamily E member 1 [Source:VGNC Symbol;Acc:VGNC:84965]	protein_coding	6.04961	6.16852	6.20251	1.54646	3.29549	2.76385	2.42192	1.27615	0.00475028	0.0229369	up	yes
ENSSSCG00000027745	ABCG1	ENSSSCT00000055448;ENSSSCT00000028391	GO:0000166(nucleotide binding);GO:0005524(ATP binding);GO:0005739(mitochondrion);GO:0005768(endosome);GO:0005886(plasma membrane);GO:0008203(cholesterol metabolic process);GO:0009897(external side of plasma membrane);GO:0010033(response to organic substance);GO:0010872(regulation of cholesterol esterification);GO:0010875(positive regulation of cholesterol efflux);GO:0010888(negative regulation of…	02010(ABC transporters);02010(ABC transporters)	K05679	NA	ATP binding cassette subfamily G member 1 [Source:VGNC Symbol;Acc:VGNC:97858]	protein_coding	8.48852	6.56596	3.15797	0.707497	0.798299	1.88958	5.3639	2.42328	5.52262e-06	8.53676e-05	up	yes
ENSSSCG00000040449	ABHD12	ENSSSCT00000030598;ENSSSCT00000047366	GO:0002084(protein depalmitoylation);GO:0004620(phospholipase activity);GO:0004622(lysophospholipase activity);GO:0005737(cytoplasm);GO:0005789(endoplasmic reticulum membrane);GO:0006660(phosphatidylserine catabolic process);GO:0007628(adult walking behavior);GO:0008474(palmitoyl-(protein) hydrolase activity);GO:0009395(phospholipid catabolic process);GO:0010996(response to auditory stimulus);GO:…	NA	K13704	EC:3.1.1.23	abhydrolase domain containing 12, lysophospholipase [Source:VGNC Symbol;Acc:VGNC:95682]	protein_coding	103.944	52.1936	55.673	12.4328	11.107	10.7709	6.17332	2.62605	2.85139e-12	1.85705e-10	up	yes
ENSSSCG00000005023	ABHD12B	ENSSSCT00000023698	GO:0004622(lysophospholipase activity);GO:0005789(endoplasmic reticulum membrane);GO:0006660(phosphatidylserine catabolic process);GO:0008474(palmitoyl-(protein) hydrolase activity);GO:0016020(membrane);GO:0047372(acylglycerol lipase activity);GO:0052651(monoacylglycerol catabolic process);GO:0098734(macromolecule depalmitoylation)	NA	K13705	EC:3.-.-.-	abhydrolase domain containing 12B [Source:VGNC Symbol;Acc:VGNC:84971]	protein_coding	2.22356	1.32431	1.84537	0.120745	0.350571	0.669324	4.72827	2.24131	0.00907681	0.037718	up	yes
ENSSSCG00000017789	ABHD15	ENSSSCT00000085784;ENSSSCT00000019361	GO:0034338(short-chain carboxylesterase activity);GO:0044255(cellular lipid metabolic process);GO:0047372(acylglycerol lipase activity);GO:0047372(acylglycerol lipase activity)	NA	K13707	NA	abhydrolase domain containing 15 [Source:VGNC Symbol;Acc:VGNC:84974]	protein_coding	3.33019	2.65881	2.28444	1.15677	1.54077	1.20636	2.11927	1.08357	0.0262148	0.084169	up	yes
ENSSSCG00000021802	ABHD17B	ENSSSCT00000026305	GO:0002084(protein depalmitoylation);GO:0005886(plasma membrane);GO:0008474(palmitoyl-(protein) hydrolase activity);GO:0010008(endosome membrane);GO:0014069(postsynaptic density);GO:0018345(protein palmitoylation);GO:0055038(recycling endosome membrane);GO:0099175(regulation of postsynapse organization);GO:1902473(regulation of protein localization to synapse);GO:1902817(negative regulation of pr…	NA	K01076	EC:3.1.2.22	abhydrolase domain containing 17B, depalmitoylase [Source:VGNC Symbol;Acc:VGNC:84977]	protein_coding	2.54114	2.20871	1.51308	0.37532	0.56752	0.874301	3.44659	1.78517	0.0109348	0.0435841	up	yes
ENSSSCG00000001782	ABHD17C	ENSSSCT00000034526	GO:0002084(protein depalmitoylation);GO:0005886(plasma membrane);GO:0008474(palmitoyl-(protein) hydrolase activity);GO:0010008(endosome membrane);GO:0014069(postsynaptic density);GO:0018345(protein palmitoylation);GO:0099175(regulation of postsynapse organization);GO:1902817(negative regulation of protein localization to microtubule);GO:1905668(positive regulation of protein localization to endos…	NA	K01076	EC:3.1.2.22	abhydrolase domain containing 17C, depalmitoylase [Source:VGNC Symbol;Acc:VGNC:84978]	protein_coding	6.97948	2.90006	2.32985	1.07664	0.997372	0.848327	4.17795	2.06279	0.00129663	0.00828392	up	yes
ENSSSCG00000009074	ABHD18	ENSSSCT00000078515;ENSSSCT00000009940	NA	NA	NA	NA	abhydrolase domain containing 18 [Source:VGNC Symbol;Acc:VGNC:84979]	protein_coding	1.878	1.82079	1.65811	0.505501	0.732473	0.604436	2.90755	1.5398	0.00927305	0.0383942	up	yes
ENSSSCG00000001835	ABHD2	ENSSSCT00000062921;ENSSSCT00000059553	GO:0001669(acrosomal vesicle);GO:0003707(steroid hormone receptor activity);GO:0007340(acrosome reaction);GO:0008126(acetylesterase activity);GO:0009611(response to wounding);GO:0016787(hydrolase activity);GO:0030336(negative regulation of cell migration);GO:0032570(response to progesterone);GO:0033878(hormone-sensitive lipase activity);GO:0034338(short-chain carboxylesterase activity);GO:0036126…	NA	K13697	NA	abhydrolase domain containing 2, acylglycerol lipase [Source:VGNC Symbol;Acc:VGNC:84980]	protein_coding	3.71492	3.40157	2.61875	7.75459	8.52012	4.12576	0.477207	-1.06731	6.29345e-05	0.000691164	down	yes
ENSSSCG00000004145	ABRACL	ENSSSCT00000004581	GO:0032970(regulation of actin filament-based process)	NA	NA	NA	ABRA C-terminal like [Source:NCBI gene (formerly Entrezgene);Acc:100525723]	protein_coding	25.9041	11.1375	7.1657	0.795153	0.534115	0.857589	20.215	4.33735	2.19384e-09	7.95456e-08	up	yes
ENSSSCG00000013303	ABTB2	ENSSSCT00000014529;ENSSSCT00000073180	GO:0005654(nucleoplasm);GO:0046982(protein heterodimerization activity);GO:0097237(cellular response to toxic substance);GO:0097237(cellular response to toxic substance)	NA	K10521	NA	ankyrin repeat and BTB domain containing 2 [Source:VGNC Symbol;Acc:VGNC:84994]	protein_coding	3.03019	4.48177	3.92915	8.54134	8.44233	8.20575	0.454203	-1.13859	1.73395e-06	3.12702e-05	down	yes
ENSSSCG00000017694	ACACA	ENSSSCT00000042467;ENSSSCT00000019259;ENSSSCT00000055904;ENSSSCT00000056594	GO:0000166(nucleotide binding);GO:0001650(fibrillar center);GO:0001894(tissue homeostasis);GO:0003824(catalytic activity);GO:0003989(acetyl-CoA carboxylase activity);GO:0005524(ATP binding);GO:0005829(cytosol);GO:0006084(acetyl-CoA metabolic process);GO:0006629(lipid metabolic process);GO:0006631(fatty acid metabolic process);GO:0006633(fatty acid biosynthetic process);GO:0008152(metabolic proces…	00061(Fatty acid biosynthesis);00620(Pyruvate metabolism);00640(Propanoate metabolism);04152(AMPK signaling pathway);04910(Insulin signaling pathway);04922(Glucagon signaling pathway);04922(Glucagon signaling pathway)	K11262	2.1.3.15;6.3.4.14;EC:6.4.1.2	acetyl-CoA carboxylase alpha [Source:VGNC Symbol;Acc:VGNC:84997]	protein_coding	7.90014	4.21865	4.18839	14.9945	13.8024	12.748	0.392519	-1.34917	1.10789e-07	2.73333e-06	down	yes
ENSSSCG00000001832	ACAN	ENSSSCT00000064359;ENSSSCT00000051705;ENSSSCT00000002052;ENSSSCT00000042657;ENSSSCT00000076809;ENSSSCT00000067012	GO:0001502(cartilage condensation);GO:0002063(chondrocyte development);GO:0005509(calcium ion binding);GO:0005540(hyaluronic acid binding);GO:0005576(extracellular region);GO:0005604(basement membrane);GO:0007155(cell adhesion);GO:0007507(heart development);GO:0030166(proteoglycan biosynthetic process);GO:0030199(collagen fibril organization);GO:0030246(carbohydrate binding);GO:0031012(extracellu…	NA	K06792	NA	aggrecan [Source:NCBI gene (formerly Entrezgene);Acc:397255]	protein_coding	1.1328	3.14293	1.75484	9.23264	2.69953	3.74524	0.384667	-1.37832	0.000347283	0.00284069	down	yes
ENSSSCG00000017943	ACAP1	ENSSSCT00000029870;ENSSSCT00000019527	GO:0005096(GTPase activator activity);GO:0043547(positive regulation of GTPase activity);GO:0046872(metal ion binding);GO:0046872(metal ion binding)	04144(Endocytosis);04144(Endocytosis)	K12489	NA	ArfGAP with coiled-coil, ankyrin repeat and PH domains 1 [Source:VGNC Symbol;Acc:VGNC:85001]	protein_coding	4.62696	0.862216	1.33642	0.450527	0.330969	0.342738	6.07134	2.60201	0.000415955	0.00330217	up	yes
ENSSSCG00000011064	ACBD5	ENSSSCT00000063580;ENSSSCT00000063336;ENSSSCT00000050348;ENSSSCT00000038370;ENSSSCT00000012108	GO:0000062(fatty-acyl-CoA binding);GO:0005654(nucleoplasm);GO:0005777(peroxisome);GO:0005778(peroxisomal membrane);GO:0006914(autophagy);GO:0008289(lipid binding);GO:0016020(membrane);GO:0016021(integral component of membrane);GO:0030242(autophagy of peroxisome);GO:0030242(autophagy of peroxisome)	NA	NA	NA	acyl-CoA binding domain containing 5 [Source:VGNC Symbol;Acc:VGNC:95997]	protein_coding	10.2676	8.98276	7.69287	2.15102	0.825056	5.31119	3.25116	1.70096	0.00686255	0.0305987	up	yes
ENSSSCG00000012138	ACE2	ENSSSCT00000034032	GO:0001618(virus receptor activity);GO:0003051(angiotensin-mediated drinking behavior);GO:0003081(regulation of systemic arterial blood pressure by renin-angiotensin);GO:0004175(endopeptidase activity);GO:0004180(carboxypeptidase activity);GO:0005576(extracellular region);GO:0005615(extracellular space);GO:0005737(cytoplasm);GO:0005886(plasma membrane);GO:0006508(proteolysis);GO:0008233(peptidase…	04614(Renin-angiotensin system);04974(Protein digestion and absorption)	K09708	EC:3.4.17.23	angiotensin I converting enzyme 2 [Source:VGNC Symbol;Acc:VGNC:85008]	protein_coding	0.183154	0.0001	0.137672	2.039	3.51065	0.174231	0.0560679	-4.15668	0.00015599	0.00147429	down	yes
ENSSSCG00000016322	ACKR3	ENSSSCT00000017775	GO:0001525(angiogenesis);GO:0001570(vasculogenesis);GO:0004930(G protein-coupled receptor activity);GO:0005044(scavenger receptor activity);GO:0005768(endosome);GO:0005886(plasma membrane);GO:0005905(clathrin-coated pit);GO:0006935(chemotaxis);GO:0006955(immune response);GO:0007165(signal transduction);GO:0007186(G protein-coupled receptor signaling pathway);GO:0007204(positive regulation of cyto…	04060(Cytokine-cytokine receptor interaction)	K04304	NA	atypical chemokine receptor 3 [Source:VGNC Symbol;Acc:VGNC:96017]	protein_coding	24.3376	21.0586	24.7812	44.2826	95.8456	76.6721	0.323697	-1.62729	1.1688e-09	4.49905e-08	down	yes
ENSSSCG00000003377	ACOT7	ENSSSCT00000089915;ENSSSCT00000078280;ENSSSCT00000047562;ENSSSCT00000003747;ENSSSCT00000039994;ENSSSCT00000056129	GO:0000062(fatty-acyl-CoA binding);GO:0005654(nucleoplasm);GO:0005829(cytosol);GO:0006631(fatty acid metabolic process);GO:0006637(acyl-CoA metabolic process);GO:0015937(coenzyme A biosynthetic process);GO:0016290(palmitoyl-CoA hydrolase activity);GO:0016787(hydrolase activity);GO:0016790(thiolester hydrolase activity);GO:0036042(long-chain fatty acyl-CoA binding);GO:0036114(medium-chain fatty-ac…	00062(Fatty acid elongation);01040(Biosynthesis of unsaturated fatty acids);01040(Biosynthesis of unsaturated fatty acids)	K17360	EC:3.1.2.2	acyl-CoA thioesterase 7 [Source:VGNC Symbol;Acc:VGNC:96893]	protein_coding	0.796031	0.587246	0.286637	0.164707	0.101562	0.11667	4.36079	2.12459	0.007422	0.0325649	up	yes
ENSSSCG00000032282	ACP5	ENSSSCT00000014867	GO:0003993(acid phosphatase activity);GO:0005764(lysosome);GO:0008198(ferrous iron binding);GO:0008199(ferric iron binding);GO:0016311(dephosphorylation);GO:0016787(hydrolase activity);GO:0032496(response to lipopolysaccharide);GO:0032691(negative regulation of interleukin-1 beta production);GO:0032695(negative regulation of interleukin-12 production);GO:0032720(negative regulation of tumor necro…	00740(Riboflavin metabolism);04142(Lysosome);04380(Osteoclast differentiation);05323(Rheumatoid arthritis)	K14379	EC:3.1.3.2	acid phosphatase 5, tartrate resistant [Source:VGNC Symbol;Acc:VGNC:85027]	protein_coding	133.206	80.6614	49.3141	0.166122	0.32915	1.62744	123.984	6.95401	6.20383e-19	1.2179e-16	up	yes
ENSSSCG00000000700	ACRBP	ENSSSCT00000000762	GO:0001669(acrosomal vesicle);GO:0001675(acrosome assembly);GO:0002080(acrosomal membrane);GO:0005515(protein binding);GO:0005576(extracellular region);GO:0007286(spermatid development);GO:0009566(fertilization);GO:0031410(cytoplasmic vesicle);GO:0048240(sperm capacitation)	NA	NA	NA	acrosin binding protein [Source:VGNC Symbol;Acc:VGNC:85029]	protein_coding	9.98368	11.6277	8.26507	4.7694	3.86083	6.26763	2.00542	1.0039	0.0331819	0.100468	up	yes
ENSSSCG00000015784	ACSL1	ENSSSCT00000077757;ENSSSCT00000048379;ENSSSCT00000083178;ENSSSCT00000079076;ENSSSCT00000086506;ENSSSCT00000069724;ENSSSCT00000053587;ENSSSCT00000058100;ENSSSCT00000081816;ENSSSCT00000017187	GO:0000038(very long-chain fatty acid metabolic process);GO:0000166(nucleotide binding);GO:0001676(long-chain fatty acid metabolic process);GO:0003824(catalytic activity);GO:0004467(long-chain fatty acid-CoA ligase activity);GO:0005739(mitochondrion);GO:0005783(endoplasmic reticulum);GO:0008610(lipid biosynthetic process);GO:0016020(membrane);GO:0016021(integral component of membrane);GO:0016874(…	00061(Fatty acid biosynthesis);00071(Fatty acid degradation);03320(PPAR signaling pathway);04146(Peroxisome);04216(Ferroptosis);04714(Thermogenesis);04920(Adipocytokine signaling pathway);04920(Adipocytokine signaling pathway)	K01897	EC:6.2.1.3	acyl-CoA synthetase long chain family member 1 [Source:VGNC Symbol;Acc:VGNC:96294]	protein_coding	9.23767	7.10461	4.99714	3.32953	3.52624	2.27411	2.33731	1.22485	0.00848458	0.0359418	up	yes
ENSSSCG00000012583	ACSL4	ENSSSCT00000051623	GO:0000166(nucleotide binding);GO:0001676(long-chain fatty acid metabolic process);GO:0003824(catalytic activity);GO:0004467(long-chain fatty acid-CoA ligase activity);GO:0005737(cytoplasm);GO:0005739(mitochondrion);GO:0005783(endoplasmic reticulum);GO:0005811(lipid droplet);GO:0005886(plasma membrane);GO:0006629(lipid metabolic process);GO:0016020(membrane);GO:0016021(integral component of membr…	00061(Fatty acid biosynthesis);00071(Fatty acid degradation);03320(PPAR signaling pathway);04146(Peroxisome);04216(Ferroptosis);04714(Thermogenesis);04920(Adipocytokine signaling pathway)	K01897	EC:6.2.1.3	acyl-CoA synthetase long chain family member 4 [Source:VGNC Symbol;Acc:VGNC:85033]	protein_coding	10.4765	6.97196	6.46092	3.14045	4.70322	3.61506	2.08656	1.06113	0.0208291	0.0713264	up	yes
ENSSSCG00000007133	ACSS1	ENSSSCT00000056062;ENSSSCT00000044534;ENSSSCT00000063197	GO:0000166(nucleotide binding);GO:0003824(catalytic activity);GO:0003987(acetate-CoA ligase activity);GO:0005524(ATP binding);GO:0005759(mitochondrial matrix);GO:0006085(acetyl-CoA biosynthetic process);GO:0016208(AMP binding);GO:0016874(ligase activity);GO:0019427(acetyl-CoA biosynthetic process from acetate);GO:0050218(propionate-CoA ligase activity);GO:0050218(propionate-CoA ligase activity)	00010(Glycolysis / Gluconeogenesis);00620(Pyruvate metabolism);00630(Glyoxylate and dicarboxylate metabolism);00640(Propanoate metabolism);00640(Propanoate metabolism)	K01895	EC:6.2.1.1	acyl-CoA synthetase short chain family member 1 [Source:VGNC Symbol;Acc:VGNC:95732]	protein_coding	13.5883	9.75499	6.48678	4.70054	4.9677	3.15446	2.32635	1.21807	0.00872005	0.0367016	up	yes
ENSSSCG00000007585	ACTB	ENSSSCT00000042531;ENSSSCT00000049015;ENSSSCT00000048365	GO:0000166(nucleotide binding);GO:0005515(protein binding);GO:0005524(ATP binding);GO:0005634(nucleus);GO:0005737(cytoplasm);GO:0005856(cytoskeleton);GO:0005884(actin filament);GO:0005886(plasma membrane);GO:0005925(focal adhesion);GO:0007409(axonogenesis);GO:0015629(actin cytoskeleton);GO:0016020(membrane);GO:0019901(protein kinase binding);GO:0030424(axon);GO:0032991(protein-containing complex)…	04015(Rap1 signaling pathway);04145(Phagosome);04210(Apoptosis);04390(Hippo signaling pathway);04510(Focal adhesion);04520(Adherens junction);04530(Tight junction);04611(Platelet activation);04670(Leukocyte transendothelial migration);04714(Thermogenesis);04810(Regulation of actin cytoskeleton);04919(Thyroid hormone signaling pathway);04921(Oxytocin signaling pathway);05100(Bacterial invasion of …	K05692	NA	actin beta [Source:VGNC Symbol;Acc:VGNC:96915]	protein_coding	427.212	356.513	397.596	970.469	746.869	978.289	0.438236	-1.19022	6.02081e-08	1.57897e-06	down	yes
ENSSSCG00000008294	ACTG2	ENSSSCT00000076210;ENSSSCT00000079845;ENSSSCT00000064546;ENSSSCT00000075630;ENSSSCT00000053043;ENSSSCT00000009083;ENSSSCT00000052319;ENSSSCT00000068159	GO:0005737(cytoplasm);GO:0005869(dynactin complex);GO:0014829(vascular smooth muscle contraction);GO:0015629(actin cytoskeleton);GO:0071944(cell periphery);GO:0071944(cell periphery)	04270(Vascular smooth muscle contraction);04270(Vascular smooth muscle contraction)	K12315	NA	actin gamma 2, smooth muscle [Source:VGNC Symbol;Acc:VGNC:85041]	protein_coding	347.611	201.512	374.413	1094.55	737.652	498.782	0.3962	-1.3357	3.78139e-06	6.23067e-05	down	yes
ENSSSCG00000036702	ACTN1	ENSSSCT00000027004;ENSSSCT00000082067	GO:0001725(stress fiber);GO:0001726(ruffle);GO:0003725(double-stranded RNA binding);GO:0003779(actin binding);GO:0005178(integrin binding);GO:0005509(calcium ion binding);GO:0005737(cytoplasm);GO:0005884(actin filament);GO:0005903(brush border);GO:0005911(cell-cell junction);GO:0005916(fascia adherens);GO:0005925(focal adhesion);GO:0007015(actin filament organization);GO:0017166(vinculin binding)…	04510(Focal adhesion);04520(Adherens junction);04530(Tight junction);04670(Leukocyte transendothelial migration);04810(Regulation of actin cytoskeleton);05146(Amoebiasis);05203(Viral carcinogenesis);05322(Systemic lupus erythematosus);05322(Systemic lupus erythematosus)	K05699	NA	actinin alpha 1 [Source:NCBI gene (formerly Entrezgene);Acc:100513412]	protein_coding	163.905	196.942	191.508	517.644	434.859	416.491	0.403475	-1.30945	4.42788e-09	1.48409e-07	down	yes
ENSSSCG00000010144	ACTN2	ENSSSCT00000069068;ENSSSCT00000061348;ENSSSCT00000023830;ENSSSCT00000037537;ENSSSCT00000011106;ENSSSCT00000085409;ENSSSCT00000066734	GO:0003779(actin binding);GO:0005509(calcium ion binding);GO:0005546(phosphatidylinositol-4,5-bisphosphate binding);GO:0005886(plasma membrane);GO:0005925(focal adhesion);GO:0006936(muscle contraction);GO:0008092(cytoskeletal protein binding);GO:0019904(protein domain specific binding);GO:0030017(sarcomere);GO:0030018(Z disc);GO:0030035(microspike assembly);GO:0030175(filopodium);GO:0030274(LIM d…	05412(Arrhythmogenic right ventricular cardiomyopathy (ARVC));05412(Arrhythmogenic right ventricular cardiomyopathy (ARVC))	K21073	NA	actinin alpha 2 [Source:VGNC Symbol;Acc:VGNC:85046]	protein_coding	0.478658	2.02707	0.693232	0.773256	4.27878	4.0519	0.351382	-1.50889	0.00251504	0.0138746	down	yes
ENSSSCG00000002965	ACTN4	ENSSSCT00000063427;ENSSSCT00000003289;ENSSSCT00000057230;ENSSSCT00000052020;ENSSSCT00000063930;ENSSSCT00000060244	GO:0000977(RNA polymerase II regulatory region sequence-specific DNA binding);GO:0001725(stress fiber);GO:0001882(nucleoside binding);GO:0003713(transcription coactivator activity);GO:0003779(actin binding);GO:0005509(calcium ion binding);GO:0005634(nucleus);GO:0005737(cytoplasm);GO:0005829(cytosol);GO:0005903(brush border);GO:0005911(cell-cell junction);GO:0015629(actin cytoskeleton);GO:0016604(…	04510(Focal adhesion);04520(Adherens junction);04530(Tight junction);04670(Leukocyte transendothelial migration);04810(Regulation of actin cytoskeleton);05146(Amoebiasis);05203(Viral carcinogenesis);05322(Systemic lupus erythematosus);05322(Systemic lupus erythematosus)	K05699	NA	actinin alpha 4 [Source:VGNC Symbol;Acc:VGNC:85047]	protein_coding	119.541	130.84	98.1088	397.899	290.82	398.142	0.320638	-1.64098	1.22408e-11	6.89395e-10	down	yes
ENSSSCG00000025682	ACTR6	ENSSSCT00000000963;ENSSSCT00000080513;ENSSSCT00000088899;ENSSSCT00000073787;ENSSSCT00000080482	GO:0000812(Swr1 complex);GO:0005634(nucleus);GO:0006338(chromatin remodeling);GO:0031491(nucleosome binding);GO:0043486(histone exchange);GO:0043486(histone exchange)	NA	K11662	NA	actin related protein 6 [Source:VGNC Symbol;Acc:VGNC:85052]	protein_coding	4.78659	4.45551	4.05471	1.34555	2.01456	2.40384	2.30689	1.20595	0.034954	0.10437	up	yes
ENSSSCG00000000232	ACVRL1	ENSSSCT00000000251;ENSSSCT00000064488	GO:0000166(nucleotide binding);GO:0001525(angiogenesis);GO:0001701(in utero embryonic development);GO:0001937(negative regulation of endothelial cell proliferation);GO:0001938(positive regulation of endothelial cell proliferation);GO:0001946(lymphangiogenesis);GO:0001974(blood vessel remodeling);GO:0003203(endocardial cushion morphogenesis);GO:0004672(protein kinase activity);GO:0004674(protein s…	04060(Cytokine-cytokine receptor interaction);04060(Cytokine-cytokine receptor interaction)	K13594	EC:2.7.11.30	activin A receptor like type 1 [Source:VGNC Symbol;Acc:VGNC:85057]	protein_coding	18.2734	16.5599	8.71076	3.89709	5.50146	2.32577	3.71399	1.89297	2.28725e-05	0.000292385	up	yes
ENSSSCG00000035218	ADA2	ENSSSCT00000041303	GO:0004000(adenosine deaminase activity);GO:0005576(extracellular region);GO:0005615(extracellular space);GO:0006154(adenosine catabolic process);GO:0008270(zinc ion binding);GO:0019239(deaminase activity);GO:0031685(adenosine receptor binding);GO:0042803(protein homodimerization activity);GO:0043394(proteoglycan binding);GO:0046103(inosine biosynthetic process)	00230(Purine metabolism)	K19572	EC:3.5.4.4	adenosine deaminase 2 [Source:NCBI gene (formerly Entrezgene);Acc:397079]	protein_coding	32.9404	16.5605	14.0314	0.491992	0.186469	0.671608	47.0586	5.55639	1.46166e-22	4.89905e-20	up	yes
ENSSSCG00000004595	ADAM10	ENSSSCT00000088907;ENSSSCT00000005076;ENSSSCT00000068164;ENSSSCT00000075460;ENSSSCT00000032619;ENSSSCT00000082688	GO:0000139(Golgi membrane);GO:0001701(in utero embryonic development);GO:0004175(endopeptidase activity);GO:0004222(metalloendopeptidase activity);GO:0005634(nucleus);GO:0005737(cytoplasm);GO:0005794(Golgi apparatus);GO:0005798(Golgi-associated vesicle);GO:0005886(plasma membrane);GO:0005912(adherens junction);GO:0006468(protein phosphorylation);GO:0006508(proteolysis);GO:0006509(membrane protein…	05010(Alzheimer disease);05010(Alzheimer disease)	K06704	EC:3.4.24.81	ADAM metallopeptidase domain 10 [Source:VGNC Symbol;Acc:VGNC:85061]	protein_coding	5.54412	3.48625	3.87216	0.924598	1.21588	0.859444	4.30095	2.10466	9.96827e-08	2.4861e-06	up	yes
ENSSSCG00000017349	ADAM11	ENSSSCT00000060197;ENSSSCT00000075216;ENSSSCT00000072637;ENSSSCT00000082733;ENSSSCT00000018885	GO:0004222(metalloendopeptidase activity);GO:0006508(proteolysis);GO:0007229(integrin-mediated signaling pathway);GO:0008237(metallopeptidase activity);GO:0016020(membrane);GO:0016021(integral component of membrane);GO:0062023(collagen-containing extracellular matrix);GO:0062023(collagen-containing extracellular matrix)	NA	K16067	EC:3.4.24.-	ADAM metallopeptidase domain 11 [Source:VGNC Symbol;Acc:VGNC:85062]	protein_coding	0.105081	0.454175	0.263747	0.506699	0.755946	0.826481	0.393946	-1.34393	0.0106214	0.0425785	down	yes
ENSSSCG00000010746	ADAM12	ENSSSCT00000074893;ENSSSCT00000011758;ENSSSCT00000042367;ENSSSCT00000081949	GO:0004222(metalloendopeptidase activity);GO:0005654(nucleoplasm);GO:0005886(plasma membrane);GO:0006508(proteolysis);GO:0007229(integrin-mediated signaling pathway);GO:0008237(metallopeptidase activity);GO:0016020(membrane);GO:0016021(integral component of membrane);GO:0017124(SH3 domain binding);GO:0045766(positive regulation of angiogenesis);GO:0045766(positive regulation of angiogenesis)	NA	K06835	EC:3.4.24.-	ADAM metallopeptidase domain 12 [Source:VGNC Symbol;Acc:VGNC:85063]	protein_coding	2.36284	1.50073	1.15203	0.354018	0.393607	0.238918	5.08401	2.34597	1.87457e-05	0.000248412	up	yes
ENSSSCG00000009644	ADAM28	ENSSSCT00000010572;ENSSSCT00000055320;ENSSSCT00000070786;ENSSSCT00000043164;ENSSSCT00000075796;ENSSSCT00000074944	GO:0004222(metalloendopeptidase activity);GO:0005739(mitochondrion);GO:0005886(plasma membrane);GO:0006508(proteolysis);GO:0007229(integrin-mediated signaling pathway);GO:0008237(metallopeptidase activity);GO:0016020(membrane);GO:0016021(integral component of membrane);GO:0016021(integral component of membrane)	NA	K08614	EC:3.4.24.-	ADAM metallopeptidase domain 28 [Source:VGNC Symbol;Acc:VGNC:85068]	protein_coding	16.7473	10.8094	6.83477	0.0846909	0.0130378	0.405937	68.2823	6.09344	1.9117e-11	1.03427e-09	up	yes
ENSSSCG00000010772	ADAM8	ENSSSCT00000033889;ENSSSCT00000085234	GO:0000902(cell morphogenesis);GO:0001525(angiogenesis);GO:0002102(podosome);GO:0002523(leukocyte migration involved in inflammatory response);GO:0002675(positive regulation of acute inflammatory response);GO:0002693(positive regulation of cellular extravasation);GO:0004222(metalloendopeptidase activity);GO:0005509(calcium ion binding);GO:0005737(cytoplasm);GO:0005886(plasma membrane);GO:0005887(…	NA	K06540	EC:3.4.24.-	ADAM metallopeptidase domain 8 [Source:VGNC Symbol;Acc:VGNC:97866]	protein_coding	4.55388	1.49279	1.37754	0.379428	1.00121	0.971097	3.1569	1.65851	0.0283914	0.0893212	up	yes
ENSSSCG00000015808	ADAM9	ENSSSCT00000017216;ENSSSCT00000072768;ENSSSCT00000079034;ENSSSCT00000037135	GO:0000186(activation of MAPKK activity);GO:0004222(metalloendopeptidase activity);GO:0005178(integrin binding);GO:0005518(collagen binding);GO:0006508(proteolysis);GO:0006509(membrane protein ectodomain proteolysis);GO:0007155(cell adhesion);GO:0007160(cell-matrix adhesion);GO:0007179(transforming growth factor beta receptor signaling pathway);GO:0007229(integrin-mediated signaling pathway);GO:0…	NA	K06834	EC:3.4.24.-	ADAM metallopeptidase domain 9 [Source:VGNC Symbol;Acc:VGNC:95969]	protein_coding	12.8258	14.3037	9.9757	3.71525	5.07311	6.18275	2.47845	1.30944	0.000976524	0.00656333	up	yes
ENSSSCG00000006359	ADAMTS4	ENSSSCT00000006968	GO:0002020(protease binding);GO:0004222(metalloendopeptidase activity);GO:0005576(extracellular region);GO:0005615(extracellular space);GO:0006508(proteolysis);GO:0008233(peptidase activity);GO:0008237(metallopeptidase activity);GO:0016607(nuclear speck);GO:0016787(hydrolase activity);GO:0030198(extracellular matrix organization);GO:0031012(extracellular matrix);GO:0046872(metal ion binding)	NA	K07764	EC:3.4.24.82	ADAM metallopeptidase with thrombospondin type 1 motif 4 [Source:VGNC Symbol;Acc:VGNC:85084]	protein_coding	6.03894	3.4482	4.1169	7.64379	15.3873	20.9344	0.309425	-1.69234	1.39948e-07	3.33882e-06	down	yes
ENSSSCG00000015249	ADAMTS8	ENSSSCT00000042241;ENSSSCT00000016618	GO:0004222(metalloendopeptidase activity);GO:0005576(extracellular region);GO:0006508(proteolysis);GO:0008233(peptidase activity);GO:0008237(metallopeptidase activity);GO:0008270(zinc ion binding);GO:0016020(membrane);GO:0016021(integral component of membrane);GO:0016787(hydrolase activity);GO:0030198(extracellular matrix organization);GO:0031012(extracellular matrix);GO:0046872(metal ion binding…	NA	K08623	EC:3.4.24.-	ADAM metallopeptidase with thrombospondin type 1 motif 8 [Source:VGNC Symbol;Acc:VGNC:85088]	protein_coding	16.2255	12.9464	45.2332	50.3591	86.887	90.7757	0.326307	-1.6157	1.25569e-05	0.000175542	down	yes
ENSSSCG00000040366	ADAMTSL1	ENSSSCT00000037462;ENSSSCT00000054691;ENSSSCT00000069205;ENSSSCT00000080785;ENSSSCT00000091188	GO:0004222(metalloendopeptidase activity);GO:0006508(proteolysis);GO:0016020(membrane);GO:0016021(integral component of membrane);GO:0030198(extracellular matrix organization);GO:0031012(extracellular matrix);GO:0031012(extracellular matrix)	NA	NA	NA	ADAMTS like 1 [Source:VGNC Symbol;Acc:VGNC:85090]	protein_coding	3.09609	3.75264	6.42245	9.41705	10.3756	10.177	0.442819	-1.17521	4.4401e-06	7.14471e-05	down	yes
ENSSSCG00000006651	ADAMTSL4	ENSSSCT00000059881;ENSSSCT00000037797;ENSSSCT00000057808;ENSSSCT00000007287	GO:0002020(protease binding);GO:0002064(epithelial cell development);GO:0004222(metalloendopeptidase activity);GO:0005576(extracellular region);GO:0005614(interstitial matrix);GO:0006508(proteolysis);GO:0030198(extracellular matrix organization);GO:0031012(extracellular matrix);GO:0043065(positive regulation of apoptotic process);GO:0043065(positive regulation of apoptotic process)	NA	NA	NA	ADAMTS like 4 [Source:VGNC Symbol;Acc:VGNC:85093]	protein_coding	8.74734	37.5676	44.6994	83.9215	76.8572	58.2284	0.415577	-1.26681	0.000677183	0.00493417	down	yes
ENSSSCG00000013433	ADAMTSL5	ENSSSCT00000014677;ENSSSCT00000074591	GO:0004222(metalloendopeptidase activity);GO:0005576(extracellular region);GO:0006508(proteolysis);GO:0030198(extracellular matrix organization);GO:0031012(extracellular matrix);GO:0031012(extracellular matrix)	NA	NA	NA	ADAMTS like 5 [Source:VGNC Symbol;Acc:VGNC:85094]	protein_coding	6.94417	26.6087	20.4305	59.0395	25.1542	74.7534	0.339631	-1.55796	8.67822e-05	0.00090689	down	yes
ENSSSCG00000017738	ADAP2	ENSSSCT00000070609;ENSSSCT00000019305	GO:0005096(GTPase activator activity);GO:0005886(plasma membrane);GO:0043231(intracellular membrane-bounded organelle);GO:0043547(positive regulation of GTPase activity);GO:1902936(phosphatidylinositol bisphosphate binding);GO:1902936(phosphatidylinositol bisphosphate binding)	NA	NA	NA	ArfGAP with dual PH domains 2 [Source:VGNC Symbol;Acc:VGNC:85096]	protein_coding	11.6826	4.83507	4.02311	0.470278	0.552465	0.676602	12.0874	3.59544	1.87653e-11	1.01926e-09	up	yes
ENSSSCG00000002408	ADCK1	ENSSSCT00000048666;ENSSSCT00000002677;ENSSSCT00000045434;ENSSSCT00000081275	GO:0004672(protein kinase activity);GO:0005524(ATP binding);GO:0005743(mitochondrial inner membrane);GO:0006468(protein phosphorylation);GO:0007005(mitochondrion organization);GO:0010637(negative regulation of mitochondrial fusion);GO:0032592(integral component of mitochondrial membrane);GO:0055088(lipid homeostasis);GO:1903852(positive regulation of cristae formation);GO:1903852(positive regulat…	NA	K08869	NA	aarF domain containing kinase 1 [Source:VGNC Symbol;Acc:VGNC:85102]	protein_coding	0.152993	0.163634	0.107154	0.346377	0.344744	0.282629	0.435204	-1.20023	0.0238441	0.0787278	down	yes
ENSSSCG00000039408	ADCY7	ENSSSCT00000063912;ENSSSCT00000040670;ENSSSCT00000050322;ENSSSCT00000031919	GO:0000166(nucleotide binding);GO:0002819(regulation of adaptive immune response);GO:0004016(adenylate cyclase activity);GO:0005524(ATP binding);GO:0005886(plasma membrane);GO:0005887(integral component of plasma membrane);GO:0006171(cAMP biosynthetic process);GO:0007189(adenylate cyclase-activating G protein-coupled receptor signaling pathway);GO:0009190(cyclic nucleotide biosynthetic process);G…	00230(Purine metabolism);01522(Endocrine resistance);04015(Rap1 signaling pathway);04020(Calcium signaling pathway);04022(cGMP-PKG signaling pathway);04024(cAMP signaling pathway);04062(Chemokine signaling pathway);04072(Phospholipase D signaling pathway);04114(Oocyte meiosis);04211(Longevity regulating pathway);04213(Longevity regulating pathway - multiple species);04261(Adrenergic signaling in …	K08047	EC:4.6.1.1	adenylate cyclase 7 [Source:VGNC Symbol;Acc:VGNC:85111]	protein_coding	9.81064	7.59487	5.76022	3.09667	2.218	1.36593	3.46761	1.79394	6.38038e-05	0.000697528	up	yes
ENSSSCG00000016672	ADCYAP1R1	ENSSSCT00000045375;ENSSSCT00000042049;ENSSSCT00000030340;ENSSSCT00000018151	GO:0004888(transmembrane signaling receptor activity);GO:0004930(G protein-coupled receptor activity);GO:0004999(vasoactive intestinal polypeptide receptor activity);GO:0005886(plasma membrane);GO:0007166(cell surface receptor signaling pathway);GO:0007186(G protein-coupled receptor signaling pathway);GO:0007188(adenylate cyclase-modulating G protein-coupled receptor signaling pathway);GO:0008528…	04024(cAMP signaling pathway);04080(Neuroactive ligand-receptor interaction);04713(Circadian entrainment);04911(Insulin secretion);04924(Renin secretion);04924(Renin secretion)	K04587	NA	ADCYAP receptor type I [Source:VGNC Symbol;Acc:VGNC:85115]	protein_coding	0.0967352	0.0416048	0.171225	0.38099	0.979299	0.179847	0.200998	-2.31474	0.00169799	0.0102296	down	yes
ENSSSCG00000010621	ADD3	ENSSSCT00000060301;ENSSSCT00000011617;ENSSSCT00000037328;ENSSSCT00000054427	GO:0000794(condensed nuclear chromosome);GO:0005198(structural molecule activity);GO:0005200(structural constituent of cytoskeleton);GO:0005737(cytoplasm);GO:0005856(cytoskeleton);GO:0005886(plasma membrane);GO:0005903(brush border);GO:0005911(cell-cell junction);GO:0005938(cell cortex);GO:0007010(cytoskeleton organization);GO:0014069(postsynaptic density);GO:0016020(membrane);GO:0030507(spectrin…	NA	K18622	NA	adducin 3 [Source:VGNC Symbol;Acc:VGNC:85118]	protein_coding	11.1661	6.50049	11.3277	2.94169	5.43828	2.84958	2.58196	1.36847	0.00339333	0.0176762	up	yes
ENSSSCG00000002814	ADGRG3	ENSSSCT00000003114	GO:0004888(transmembrane signaling receptor activity);GO:0004930(G protein-coupled receptor activity);GO:0005886(plasma membrane);GO:0005887(integral component of plasma membrane);GO:0007166(cell surface receptor signaling pathway);GO:0007186(G protein-coupled receptor signaling pathway);GO:0007189(adenylate cyclase-activating G protein-coupled receptor signaling pathway);GO:0016020(membrane);GO:…	NA	K08452	NA	adhesion G protein-coupled receptor G3 [Source:VGNC Symbol;Acc:VGNC:85131]	protein_coding	4.39087	0.589013	0.79455	0.132602	0.170967	0.048678	16.3931	4.03502	4.88254e-05	0.000558666	up	yes
ENSSSCG00000004139	ADGRG6	ENSSSCT00000064165;ENSSSCT00000053391;ENSSSCT00000004574	GO:0004888(transmembrane signaling receptor activity);GO:0004930(G protein-coupled receptor activity);GO:0005737(cytoplasm);GO:0005886(plasma membrane);GO:0005887(integral component of plasma membrane);GO:0007005(mitochondrion organization);GO:0007166(cell surface receptor signaling pathway);GO:0007186(G protein-coupled receptor signaling pathway);GO:0007189(adenylate cyclase-activating G protein…	NA	K08463	NA	adhesion G protein-coupled receptor G6 [Source:VGNC Symbol;Acc:VGNC:85133]	protein_coding	6.00563	2.25008	1.81944	0.566773	0.650201	0.848455	4.87799	2.28629	4.61527e-05	0.000532967	up	yes
ENSSSCG00000003762	ADGRL4	ENSSSCT00000041037;ENSSSCT00000046464	GO:0004888(transmembrane signaling receptor activity);GO:0004930(G protein-coupled receptor activity);GO:0005509(calcium ion binding);GO:0005886(plasma membrane);GO:0005887(integral component of plasma membrane);GO:0007166(cell surface receptor signaling pathway);GO:0007186(G protein-coupled receptor signaling pathway);GO:0007189(adenylate cyclase-activating G protein-coupled receptor signaling p…	NA	K04595	NA	adhesion G protein-coupled receptor L4 [Source:VGNC Symbol;Acc:VGNC:85138]	protein_coding	10.7103	4.76259	3.60515	1.64523	2.48198	1.28091	3.52767	1.81872	0.00130677	0.00833301	up	yes
ENSSSCG00000007346	ADIG	ENSSSCT00000008038	GO:0005634(nucleus);GO:0005737(cytoplasm);GO:0005811(lipid droplet);GO:0007283(spermatogenesis);GO:0016020(membrane);GO:0016021(integral component of membrane);GO:0045444(fat cell differentiation);GO:0045600(positive regulation of fat cell differentiation);GO:0050872(white fat cell differentiation);GO:0050873(brown fat cell differentiation)	NA	K21409	NA	adipogenin [Source:VGNC Symbol;Acc:VGNC:96182]	protein_coding	0.0001	0.0001	0.210171	1.59366	2.0538	0.0001	0.0576745	-4.11592	0.0117012	0.045903	down	yes
ENSSSCG00000039103	ADIPOQ	ENSSSCT00000047495;ENSSSCT00000038265;ENSSSCT00000050445	GO:0001934(positive regulation of protein phosphorylation);GO:0005102(signaling receptor binding);GO:0005179(hormone activity);GO:0005576(extracellular region);GO:0005615(extracellular space);GO:0005783(endoplasmic reticulum);GO:0006006(glucose metabolic process);GO:0006635(fatty acid beta-oxidation);GO:0007165(signal transduction);GO:0009617(response to bacterium);GO:0009749(response to glucose)…	03320(PPAR signaling pathway);04152(AMPK signaling pathway);04211(Longevity regulating pathway);04920(Adipocytokine signaling pathway);04930(Type II diabetes mellitus);04932(Non-alcoholic fatty liver disease (NAFLD));04932(Non-alcoholic fatty liver disease (NAFLD))	K07296	NA	adiponectin, C1Q and collagen domain containing [Source:VGNC Symbol;Acc:VGNC:85140]	protein_coding	4.07954	0.301278	4.03935	39.1177	59.8619	1.22458	0.08403	-3.57295	0.000116617	0.00115624	down	yes
ENSSSCG00000037918	ADIRF	ENSSSCT00000064532	GO:0005634(nucleus);GO:0005654(nucleoplasm);GO:0005829(cytosol);GO:0045600(positive regulation of fat cell differentiation);GO:0045944(positive regulation of transcription by RNA polymerase II);GO:0071478(cellular response to radiation);GO:0072719(cellular response to cisplatin);GO:2001023(regulation of response to drug)	NA	K21408	NA	adipogenesis regulatory factor [Source:VGNC Symbol;Acc:VGNC:85142]	protein_coding	582.212	1039.35	1308.44	335.258	237.88	337.669	3.21694	1.68569	6.09918e-05	0.000671056	up	yes
ENSSSCG00000010315	ADK	ENSSSCT00000075864;ENSSSCT00000073177;ENSSSCT00000047969;ENSSSCT00000077295;ENSSSCT00000011292;ENSSSCT00000047518;ENSSSCT00000064781;ENSSSCT00000079892;ENSSSCT00000065961	GO:0004001(adenosine kinase activity);GO:0005634(nucleus);GO:0005654(nucleoplasm);GO:0005829(cytosol);GO:0006166(purine ribonucleoside salvage);GO:0006175(dATP biosynthetic process);GO:0016301(kinase activity);GO:0016310(phosphorylation);GO:0016740(transferase activity);GO:0016773(phosphotransferase activity, alcohol group as acceptor);GO:0044209(AMP salvage);GO:0044209(AMP salvage)	00230(Purine metabolism);00230(Purine metabolism)	K00856	EC:2.7.1.20	adenosine kinase [Source:VGNC Symbol;Acc:VGNC:85143]	protein_coding	0.808442	0.584152	0.531835	0.227641	0.247051	0.242432	2.68354	1.42414	0.020023	0.0690825	up	yes
ENSSSCG00000006788	ADORA3	ENSSSCT00000079834;ENSSSCT00000062350;ENSSSCT00000069134;ENSSSCT00000007435;ENSSSCT00000007436	GO:0001609(G protein-coupled adenosine receptor activity);GO:0001973(G protein-coupled adenosine receptor signaling pathway);GO:0004930(G protein-coupled receptor activity);GO:0005886(plasma membrane);GO:0007165(signal transduction);GO:0007186(G protein-coupled receptor signaling pathway);GO:0008285(negative regulation of cell population proliferation);GO:0016020(membrane);GO:0016021(integral com…	04022(cGMP-PKG signaling pathway);04071(Sphingolipid signaling pathway);04080(Neuroactive ligand-receptor interaction);04080(Neuroactive ligand-receptor interaction)	K04268	NA	transmembrane and immunoglobulin domain containing 3 [Source:NCBI gene (formerly Entrezgene);Acc:104564308]	protein_coding	4.27083	3.60703	5.31281	0.809748	0.565649	0.483114	7.09744	2.8273	1.38199e-10	6.26775e-09	up	yes
ENSSSCG00000009661	ADRA1A	ENSSSCT00000065003;ENSSSCT00000010593;ENSSSCT00000062869	GO:0001985(negative regulation of heart rate involved in baroreceptor response to increased systemic arterial blood pressure);GO:0001994(norepinephrine-epinephrine vasoconstriction involved in regulation of systemic arterial blood pressure);GO:0001996(positive regulation of heart rate by epinephrine-norepinephrine);GO:0001997(positive regulation of the force of heart contraction by epinephrine-no…	04020(Calcium signaling pathway);04022(cGMP-PKG signaling pathway);04080(Neuroactive ligand-receptor interaction);04152(AMPK signaling pathway);04261(Adrenergic signaling in cardiomyocytes);04270(Vascular smooth muscle contraction);04970(Salivary secretion);04970(Salivary secretion)	K04135	NA	adrenoceptor alpha 1A [Source:VGNC Symbol;Acc:VGNC:85154]	protein_coding	0.676684	0.160053	0.465821	3.02522	0.996202	0.96673	0.26113	-1.93716	0.000319782	0.00265967	down	yes
ENSSSCG00000017041	ADRA1B	ENSSSCT00000018554	GO:0001996(positive regulation of heart rate by epinephrine-norepinephrine);GO:0004930(G protein-coupled receptor activity);GO:0004935(adrenergic receptor activity);GO:0004937(alpha1-adrenergic receptor activity);GO:0005634(nucleus);GO:0005737(cytoplasm);GO:0005886(plasma membrane);GO:0005887(integral component of plasma membrane);GO:0005901(caveola);GO:0006937(regulation of muscle contraction);G…	04020(Calcium signaling pathway);04022(cGMP-PKG signaling pathway);04080(Neuroactive ligand-receptor interaction);04261(Adrenergic signaling in cardiomyocytes);04270(Vascular smooth muscle contraction);04970(Salivary secretion)	K04136	NA	adrenoceptor alpha 1B [Source:VGNC Symbol;Acc:VGNC:85155]	protein_coding	2.93833	4.37206	4.93874	11.5978	8.91681	4.17535	0.496118	-1.01125	0.00206056	0.0119126	down	yes
ENSSSCG00000007139	ADRA1D	ENSSSCT00000007811	GO:0001996(positive regulation of heart rate by epinephrine-norepinephrine);GO:0004930(G protein-coupled receptor activity);GO:0004935(adrenergic receptor activity);GO:0004937(alpha1-adrenergic receptor activity);GO:0005886(plasma membrane);GO:0005887(integral component of plasma membrane);GO:0007165(signal transduction);GO:0007186(G protein-coupled receptor signaling pathway);GO:0007200(phosphol…	04020(Calcium signaling pathway);04022(cGMP-PKG signaling pathway);04080(Neuroactive ligand-receptor interaction);04261(Adrenergic signaling in cardiomyocytes);04270(Vascular smooth muscle contraction);04970(Salivary secretion)	K04137	NA	adrenoceptor alpha 1D [Source:NCBI gene (formerly Entrezgene);Acc:552898]	protein_coding	1.98396	1.79127	3.12814	18.9146	7.5607	8.32601	0.198365	-2.33377	4.42621e-08	1.19265e-06	down	yes
ENSSSCG00000000587	AEBP2	ENSSSCT00000000632;ENSSSCT00000037031;ENSSSCT00000040914;ENSSSCT00000071537;ENSSSCT00000089424	GO:0000122(negative regulation of transcription by RNA polymerase II);GO:0000978(RNA polymerase II cis-regulatory region sequence-specific DNA binding);GO:0001227(DNA-binding transcription repressor activity, RNA polymerase II-specific);GO:0003677(DNA binding);GO:0005634(nucleus);GO:0005654(nucleoplasm);GO:0006355(regulation of transcription, DNA-templated);GO:0035098(ESC/E(Z) complex);GO:0035098…	NA	K17452	NA	AE binding protein 2 [Source:VGNC Symbol;Acc:VGNC:85163]	protein_coding	5.79216	4.22821	4.37536	1.50419	2.46068	1.83942	2.48019	1.31045	0.00445516	0.0219122	up	yes
ENSSSCG00000023907	AFAP1	ENSSSCT00000032392;ENSSSCT00000039817;ENSSSCT00000009536;ENSSSCT00000044439;ENSSSCT00000071758	GO:0005829(cytosol);GO:0005925(focal adhesion);GO:0009966(regulation of signal transduction);GO:0015629(actin cytoskeleton);GO:0017124(SH3 domain binding);GO:0042169(SH2 domain binding);GO:0051493(regulation of cytoskeleton organization);GO:0051493(regulation of cytoskeleton organization)	NA	K18616	NA	actin filament associated protein 1 [Source:VGNC Symbol;Acc:VGNC:85165]	protein_coding	3.98215	4.02794	10.6337	21.2818	25.6438	30.738	0.240058	-2.05855	3.26138e-09	1.12608e-07	down	yes
ENSSSCG00000040199	AFG1L	ENSSSCT00000056646;ENSSSCT00000022746;ENSSSCT00000046117	GO:0000166(nucleotide binding);GO:0005524(ATP binding);GO:0005737(cytoplasm);GO:0005739(mitochondrion);GO:0006123(mitochondrial electron transport, cytochrome c to oxygen);GO:0007005(mitochondrion organization);GO:0016887(ATPase activity);GO:0031966(mitochondrial membrane);GO:0035694(mitochondrial protein catabolic process);GO:0035694(mitochondrial protein catabolic process)	NA	K18798	EC:3.6.4.7	AFG1 like ATPase [Source:VGNC Symbol;Acc:VGNC:85170]	protein_coding	0.793285	0.752842	0.293414	0.16911	0.220659	0.174607	3.25942	1.70462	0.0415945	0.118612	up	yes
ENSSSCG00000038732	AGAP2	ENSSSCT00000041217;ENSSSCT00000039628;ENSSSCT00000000486	GO:0003924(GTPase activity);GO:0005096(GTPase activator activity);GO:0005525(GTP binding);GO:0005634(nucleus);GO:0005654(nucleoplasm);GO:0005829(cytosol);GO:0033601(positive regulation of mammary gland epithelial cell proliferation);GO:0043066(negative regulation of apoptotic process);GO:0043547(positive regulation of GTPase activity);GO:0045944(positive regulation of transcription by RNA polymer…	04068(FoxO signaling pathway);04144(Endocytosis);04144(Endocytosis)	K17848	NA	ArfGAP with GTPase domain, ankyrin repeat and PH domain 2 [Source:VGNC Symbol;Acc:VGNC:85174]	protein_coding	1.9504	0.76547	0.706019	0.37585	0.318214	0.13319	4.13645	2.04839	0.00761591	0.0331301	up	yes
ENSSSCG00000010184	AGT	ENSSSCT00000050329;ENSSSCT00000011150;ENSSSCT00000036625	GO:0000187(activation of MAPK activity);GO:0001822(kidney development);GO:0003014(renal system process);GO:0003081(regulation of systemic arterial blood pressure by renin-angiotensin);GO:0004867(serine-type endopeptidase inhibitor activity);GO:0005576(extracellular region);GO:0005615(extracellular space);GO:0007186(G protein-coupled receptor signaling pathway);GO:0008217(regulation of blood press…	04072(Phospholipase D signaling pathway);04080(Neuroactive ligand-receptor interaction);04261(Adrenergic signaling in cardiomyocytes);04270(Vascular smooth muscle contraction);04614(Renin-angiotensin system);04924(Renin secretion);04925(Aldosterone synthesis and secretion);04927(Cortisol synthesis and secretion);04931(Insulin resistance);04933(AGE-RAGE signaling pathway in diabetic complications)…	K09821	NA	angiotensinogen [Source:VGNC Symbol;Acc:VGNC:85190]	protein_coding	1.89489	0.755243	2.46559	4.48717	8.60308	0.661311	0.372011	-1.42658	0.0121266	0.047168	down	yes
ENSSSCG00000030484	AHR	ENSSSCT00000031031	GO:0000122(negative regulation of transcription by RNA polymerase II);GO:0003700(DNA-binding transcription factor activity);GO:0004879(nuclear receptor activity);GO:0005634(nucleus);GO:0005737(cytoplasm);GO:0006355(regulation of transcription, DNA-templated);GO:0006805(xenobiotic metabolic process);GO:0009410(response to xenobiotic stimulus);GO:0030522(intracellular receptor signaling pathway);GO…	04659(Th17 cell differentiation);04934(Cushing syndrome)	K09093	NA	aryl hydrocarbon receptor [Source:NCBI gene (formerly Entrezgene);Acc:396654]	protein_coding	8.87439	4.53813	3.50313	0.417722	0.717014	0.39791	11.0369	3.46426	1.12329e-11	6.43178e-10	up	yes
ENSSSCG00000010835	AIDA	ENSSSCT00000011854;ENSSSCT00000084096;ENSSSCT00000077116;ENSSSCT00000085724	GO:0005737(cytoplasm);GO:0007275(multicellular organism development);GO:0016020(membrane);GO:0019904(protein domain specific binding);GO:0031333(negative regulation of protein-containing complex assembly);GO:0035091(phosphatidylinositol binding);GO:0043254(regulation of protein-containing complex assembly);GO:0043508(negative regulation of JUN kinase activity);GO:0046329(negative regulation of JN…	NA	NA	NA	axin interactor, dorsalization associated [Source:VGNC Symbol;Acc:VGNC:96103]	protein_coding	6.90871	6.03755	5.06546	17.5405	21.5159	21.5029	0.297423	-1.74941	1.89707e-13	1.55176e-11	down	yes
ENSSSCG00000032341	AIF1	ENSSSCT00000061790;ENSSSCT00000069637	GO:0001726(ruffle);GO:0001891(phagocytic cup);GO:0005509(calcium ion binding);GO:0005634(nucleus);GO:0005737(cytoplasm);GO:0005829(cytosol);GO:0005884(actin filament);GO:0006911(phagocytosis, engulfment);GO:0008284(positive regulation of cell population proliferation);GO:0016601(Rac protein signal transduction);GO:0030027(lamellipodium);GO:0030041(actin filament polymerization);GO:0030046(paralle…	NA	K18617	NA	allograft inflammatory factor 1 [Source:VGNC Symbol;Acc:VGNC:85197]	protein_coding	66.0118	26.1117	26.7466	0.948061	0.885629	0.943025	42.8096	5.41986	7.7254e-29	6.63516e-26	up	yes
ENSSSCG00000023595	AK3	ENSSSCT00000027088;ENSSSCT00000076024;ENSSSCT00000082107	GO:0000166(nucleotide binding);GO:0004017(adenylate kinase activity);GO:0004550(nucleoside diphosphate kinase activity);GO:0005524(ATP binding);GO:0005525(GTP binding);GO:0005737(cytoplasm);GO:0005739(mitochondrion);GO:0005759(mitochondrial matrix);GO:0006139(nucleobase-containing compound metabolic process);GO:0006163(purine nucleotide metabolic process);GO:0006165(nucleoside diphosphate phospho…	00230(Purine metabolism);00230(Purine metabolism)	K00944	EC:2.7.4.10	adenylate kinase 3 [Source:VGNC Symbol;Acc:VGNC:97876]	protein_coding	8.56624	4.11246	6.12436	2.24661	2.92843	2.4816	2.45578	1.29618	0.00952559	0.0392623	up	yes
ENSSSCG00000040337	AK4	ENSSSCT00000036875;ENSSSCT00000042416	GO:0000166(nucleotide binding);GO:0002082(regulation of oxidative phosphorylation);GO:0004017(adenylate kinase activity);GO:0004550(nucleoside diphosphate kinase activity);GO:0005524(ATP binding);GO:0005525(GTP binding);GO:0005737(cytoplasm);GO:0005739(mitochondrion);GO:0005759(mitochondrial matrix);GO:0006139(nucleobase-containing compound metabolic process);GO:0006163(purine nucleotide metaboli…	00230(Purine metabolism);00730(Thiamine metabolism);00730(Thiamine metabolism)	K00939	EC:2.7.4.3	adenylate kinase 4 [Source:VGNC Symbol;Acc:VGNC:85209]	protein_coding	7.13	7.73693	8.73619	11.3643	18.1745	18.3668	0.492701	-1.02122	4.07788e-06	6.6396e-05	down	yes
ENSSSCG00000037053	AK6	ENSSSCT00000070506;ENSSSCT00000087527;ENSSSCT00000070015;ENSSSCT00000046334	GO:0000166(nucleotide binding);GO:0004017(adenylate kinase activity);GO:0005524(ATP binding);GO:0005634(nucleus);GO:0005654(nucleoplasm);GO:0005737(cytoplasm);GO:0005813(centrosome);GO:0005829(cytosol);GO:0015030(Cajal body);GO:0016301(kinase activity);GO:0016310(phosphorylation);GO:0016607(nuclear speck);GO:0016740(transferase activity);GO:0016887(ATPase activity);GO:0046940(nucleoside monophosp…	00230(Purine metabolism);03008(Ribosome biogenesis in eukaryotes);03008(Ribosome biogenesis in eukaryotes)	K18532	EC:2.7.4.3	adenylate kinase 6 [Source:VGNC Symbol;Acc:VGNC:85211]	protein_coding	3.95558	3.37328	5.14601	0.862429	1.49789	1.51164	3.22185	1.68789	0.00568213	0.0263529	up	yes
ENSSSCG00000002504	AK7	ENSSSCT00000080270;ENSSSCT00000002782	GO:0004017(adenylate kinase activity);GO:0004127(cytidylate kinase activity);GO:0004550(nucleoside diphosphate kinase activity);GO:0005524(ATP binding);GO:0005737(cytoplasm);GO:0006139(nucleobase-containing compound metabolic process);GO:0006163(purine nucleotide metabolic process);GO:0006165(nucleoside diphosphate phosphorylation);GO:0009142(nucleoside triphosphate biosynthetic process);GO:00163…	00230(Purine metabolism);00730(Thiamine metabolism);00730(Thiamine metabolism)	K00939	EC:2.7.4.3	adenylate kinase 7 [Source:VGNC Symbol;Acc:VGNC:85212]	protein_coding	0.052361	0.678939	0.375193	0.0212988	0.0001	0.114764	8.12623	3.02259	0.0249435	0.0812646	up	yes
ENSSSCG00000034994	AKAP1	ENSSSCT00000053504	GO:0003676(nucleic acid binding);GO:0003723(RNA binding);GO:0005739(mitochondrion);GO:0010738(regulation of protein kinase A signaling);GO:0016020(membrane);GO:0016021(integral component of membrane);GO:0034237(protein kinase A regulatory subunit binding);GO:0140374(antiviral innate immune response)	NA	K16518	NA	A-kinase anchoring protein 1 [Source:VGNC Symbol;Acc:VGNC:85214]	protein_coding	8.99289	11.0456	8.61023	22.9394	15.0051	24.6118	0.457967	-1.12669	1.36005e-06	2.53937e-05	down	yes
ENSSSCG00000040608	AKR1B1	ENSSSCT00000065341;ENSSSCT00000077521	GO:0001523(retinoid metabolic process);GO:0001758(retinal dehydrogenase activity);GO:0002070(epithelial cell maturation);GO:0003091(renal water homeostasis);GO:0004032(alditol:NADP+ 1-oxidoreductase activity);GO:0005654(nucleoplasm);GO:0005829(cytosol);GO:0008106(alcohol dehydrogenase (NADP+) activity);GO:0016491(oxidoreductase activity);GO:0035809(regulation of urine volume);GO:0043066(negative …	00040(Pentose and glucuronate interconversions);00051(Fructose and mannose metabolism);00052(Galactose metabolism);00561(Glycerolipid metabolism);00790(Folate biosynthesis);00790(Folate biosynthesis)	K00011	EC:1.1.1.21	aldo-keto reductase family 1 member B [Source:NCBI gene (formerly Entrezgene);Acc:396816]	protein_coding	115.821	88.1426	86.8104	26.268	25.3563	34.6723	3.36947	1.75252	4.78409e-07	9.94911e-06	up	yes
ENSSSCG00000012347	ALAS2	ENSSSCT00000013502;ENSSSCT00000034915	GO:0001666(response to hypoxia);GO:0003824(catalytic activity);GO:0003870(5-aminolevulinate synthase activity);GO:0005739(mitochondrion);GO:0005743(mitochondrial inner membrane);GO:0005759(mitochondrial matrix);GO:0006778(porphyrin-containing compound metabolic process);GO:0006782(protoporphyrinogen IX biosynthetic process);GO:0006783(heme biosynthetic process);GO:0006879(cellular iron ion homeos…	00260(Glycine, serine and threonine metabolism);00860(Porphyrin and chlorophyll metabolism);00860(Porphyrin and chlorophyll metabolism)	K00643	EC:2.3.1.37	5'-aminolevulinate synthase 2 [Source:VGNC Symbol;Acc:VGNC:85235]	protein_coding	37.1596	0.909208	1.62862	3.93211	0.727616	2.20811	5.78019	2.53112	0.0307337	0.0945897	up	yes
ENSSSCG00000008948	ALB	ENSSSCT00000050096;ENSSSCT00000057761;ENSSSCT00000064748;ENSSSCT00000050020;ENSSSCT00000009802	GO:0003677(DNA binding);GO:0005504(fatty acid binding);GO:0005576(extracellular region);GO:0005615(extracellular space);GO:0005737(cytoplasm);GO:0005783(endoplasmic reticulum);GO:0005794(Golgi apparatus);GO:0008144(drug binding);GO:0009267(cellular response to starvation);GO:0015643(toxic substance binding);GO:0019825(oxygen binding);GO:0030170(pyridoxal phosphate binding);GO:0032991(protein-cont…	04918(Thyroid hormone synthesis);04918(Thyroid hormone synthesis)	K16141	NA	albumin [Source:VGNC Symbol;Acc:VGNC:98911]	protein_coding	0.122021	3.17264	1.08143	0.52418	0.0919702	0.0924393	6.17579	2.62662	0.0180646	0.0638109	up	yes
ENSSSCG00000011946	ALCAM	ENSSSCT00000013072;ENSSSCT00000043034;ENSSSCT00000032688;ENSSSCT00000034028	GO:0001772(immunological synapse);GO:0005886(plasma membrane);GO:0007157(heterophilic cell-cell adhesion via plasma membrane cell adhesion molecules);GO:0007411(axon guidance);GO:0008045(motor neuron axon guidance);GO:0009897(external side of plasma membrane);GO:0016020(membrane);GO:0016021(integral component of membrane);GO:0030424(axon);GO:0030425(dendrite);GO:0031226(intrinsic component of pla…	04514(Cell adhesion molecules (CAMs));04514(Cell adhesion molecules (CAMs))	K06547	NA	activated leukocyte cell adhesion molecule [Source:VGNC Symbol;Acc:VGNC:85236]	protein_coding	7.73067	6.93547	3.50344	1.59889	2.05269	1.3335	3.64478	1.86583	2.04402e-05	0.000266246	up	yes
ENSSSCG00000030626	ALDH1L1	ENSSSCT00000057479;ENSSSCT00000088738;ENSSSCT00000028556	GO:0003824(catalytic activity);GO:0004029(aldehyde dehydrogenase (NAD+) activity);GO:0005737(cytoplasm);GO:0005829(cytosol);GO:0006730(one-carbon metabolic process);GO:0009058(biosynthetic process);GO:0009258(10-formyltetrahydrofolate catabolic process);GO:0016155(formyltetrahydrofolate dehydrogenase activity);GO:0016491(oxidoreductase activity);GO:0016620(oxidoreductase activity, acting on the a…	00670(One carbon pool by folate);00670(One carbon pool by folate)	K00289	EC:1.5.1.6	aldehyde dehydrogenase 1 family member L1 [Source:VGNC Symbol;Acc:VGNC:97881]	protein_coding	0.166492	0.428518	0.153668	1.39186	2.64988	0.122024	0.179808	-2.47547	0.00109573	0.00720801	down	yes
ENSSSCG00000000839	ALDH1L2	ENSSSCT00000000913	GO:0003824(catalytic activity);GO:0004029(aldehyde dehydrogenase (NAD+) activity);GO:0005654(nucleoplasm);GO:0005739(mitochondrion);GO:0006730(one-carbon metabolic process);GO:0009058(biosynthetic process);GO:0016155(formyltetrahydrofolate dehydrogenase activity);GO:0016491(oxidoreductase activity);GO:0016620(oxidoreductase activity, acting on the aldehyde or oxo group of donors, NAD or NADP as a…	00670(One carbon pool by folate)	K00289	EC:1.5.1.6	aldehyde dehydrogenase 1 family member L2 [Source:VGNC Symbol;Acc:VGNC:97882]	protein_coding	14.4682	8.77118	9.92855	4.75586	5.66781	5.69975	2.05713	1.04063	0.0127023	0.0490049	up	yes
ENSSSCG00000017759	ALDOC	ENSSSCT00000040239;ENSSSCT00000065042;ENSSSCT00000019331	GO:0003824(catalytic activity);GO:0004332(fructose-bisphosphate aldolase activity);GO:0005829(cytosol);GO:0006096(glycolytic process);GO:0008092(cytoskeletal protein binding);GO:0016829(lyase activity);GO:0030388(fructose 1,6-bisphosphate metabolic process);GO:0030855(epithelial cell differentiation);GO:0030855(epithelial cell differentiation)	00010(Glycolysis / Gluconeogenesis);00030(Pentose phosphate pathway);00051(Fructose and mannose metabolism);00051(Fructose and mannose metabolism)	K01623	EC:4.1.2.13	aldolase, fructose-bisphosphate C [Source:VGNC Symbol;Acc:VGNC:85246]	protein_coding	3.03253	3.58227	3.80087	1.82193	0.723943	2.23069	2.18058	1.12471	0.0414797	0.118334	up	yes
ENSSSCG00000009360	ALG5	ENSSSCT00000010257;ENSSSCT00000063775	GO:0004581(dolichyl-phosphate beta-glucosyltransferase activity);GO:0005789(endoplasmic reticulum membrane);GO:0006487(protein N-linked glycosylation);GO:0007368(determination of left/right symmetry);GO:0007368(determination of left/right symmetry)	00510(N-Glycan biosynthesis);00510(N-Glycan biosynthesis)	K00729	EC:2.4.1.117	ALG5 dolichyl-phosphate beta-glucosyltransferase [Source:VGNC Symbol;Acc:VGNC:85252]	protein_coding	16.6867	15.5145	17.096	6.9694	7.28669	8.02821	2.2122	1.14548	0.0232269	0.0775284	up	yes
ENSSSCG00000003815	ALG6	ENSSSCT00000004222;ENSSSCT00000059178	GO:0005783(endoplasmic reticulum);GO:0005789(endoplasmic reticulum membrane);GO:0006486(protein glycosylation);GO:0006487(protein N-linked glycosylation);GO:0006488(dolichol-linked oligosaccharide biosynthetic process);GO:0006490(oligosaccharide-lipid intermediate biosynthetic process);GO:0016020(membrane);GO:0016021(integral component of membrane);GO:0016740(transferase activity);GO:0016757(tran…	00510(N-Glycan biosynthesis);00510(N-Glycan biosynthesis)	K03848	EC:2.4.1.267	ALG6 alpha-1,3-glucosyltransferase [Source:VGNC Symbol;Acc:VGNC:85253]	protein_coding	1.03358	1.26571	0.944106	0.114621	0.192874	0.43728	4.35485	2.12262	0.00459105	0.0224281	up	yes
ENSSSCG00000014887	ALG8	ENSSSCT00000016241;ENSSSCT00000068660;ENSSSCT00000025247;ENSSSCT00000038397	GO:0000033(alpha-1,3-mannosyltransferase activity);GO:0005783(endoplasmic reticulum);GO:0005789(endoplasmic reticulum membrane);GO:0006486(protein glycosylation);GO:0006487(protein N-linked glycosylation);GO:0006490(oligosaccharide-lipid intermediate biosynthetic process);GO:0016020(membrane);GO:0016021(integral component of membrane);GO:0016740(transferase activity);GO:0016757(transferase activi…	00510(N-Glycan biosynthesis);00510(N-Glycan biosynthesis)	K03849	EC:2.4.1.265	ALG8 alpha-1,3-glucosyltransferase [Source:VGNC Symbol;Acc:VGNC:85254]	protein_coding	4.30338	2.69188	2.62981	0.965288	0.969261	1.27904	2.99512	1.58261	0.00685209	0.030562	up	yes
ENSSSCG00000010404	ALOX5	ENSSSCT00000033520	GO:0001937(negative regulation of endothelial cell proliferation);GO:0002232(leukocyte chemotaxis involved in inflammatory response);GO:0002523(leukocyte migration involved in inflammatory response);GO:0002540(leukotriene production involved in inflammatory response);GO:0004051(arachidonate 5-lipoxygenase activity);GO:0005506(iron ion binding);GO:0005634(nucleus);GO:0005635(nuclear envelope);GO:0…	00590(Arachidonic acid metabolism);04664(Fc epsilon RI signaling pathway);04726(Serotonergic synapse);04913(Ovarian steroidogenesis);05145(Toxoplasmosis)	K00461	EC:1.13.11.34	arachidonate 5-lipoxygenase [Source:VGNC Symbol;Acc:VGNC:85266]	protein_coding	13.4912	5.5609	6.26036	0.646993	0.910839	0.703726	11.1925	3.48446	1.54012e-11	8.46573e-10	up	yes
ENSSSCG00000009330	ALOX5AP	ENSSSCT00000010224	GO:0002540(leukotriene production involved in inflammatory response);GO:0005634(nucleus);GO:0005783(endoplasmic reticulum);GO:0005789(endoplasmic reticulum membrane);GO:0006691(leukotriene metabolic process);GO:0008047(enzyme activator activity);GO:0016020(membrane);GO:0016021(integral component of membrane);GO:0019370(leukotriene biosynthetic process);GO:0043085(positive regulation of catalytic …	04664(Fc epsilon RI signaling pathway)	K20735	NA	arachidonate 5-lipoxygenase activating protein [Source:NCBI gene (formerly Entrezgene);Acc:397392]	protein_coding	40.6591	21.1628	35.125	9.79986	8.11166	14.8615	2.95813	1.56469	0.0015149	0.00931173	up	yes
ENSSSCG00000031348	ALPK1	ENSSSCT00000009994;ENSSSCT00000009995	GO:0002753(cytoplasmic pattern recognition receptor signaling pathway);GO:0004674(protein serine/threonine kinase activity);GO:0005524(ATP binding);GO:0005829(cytosol);GO:0006468(protein phosphorylation);GO:0016301(kinase activity);GO:0016310(phosphorylation);GO:0016740(transferase activity);GO:0043123(positive regulation of I-kappaB kinase/NF-kappaB signaling);GO:0045087(innate immune response);…	NA	K08868	NA	alpha kinase 1 [Source:NCBI gene (formerly Entrezgene);Acc:100514116]	protein_coding	5.61203	2.9288	2.20667	0.904337	0.832961	1.65655	3.16676	1.66301	0.00596437	0.0273863	up	yes
ENSSSCG00000006812	ALX3	ENSSSCT00000007462;ENSSSCT00000081039	GO:0000977(RNA polymerase II regulatory region sequence-specific DNA binding);GO:0000981(DNA-binding transcription factor activity, RNA polymerase II-specific);GO:0003677(DNA binding);GO:0005634(nucleus);GO:0006355(regulation of transcription, DNA-templated);GO:0006357(regulation of transcription by RNA polymerase II);GO:0007389(pattern specification process);GO:0035115(embryonic forelimb morphog…	NA	K09323	NA	ALX homeobox 3 [Source:VGNC Symbol;Acc:VGNC:85272]	protein_coding	0.0001	0.149254	0.206907	0.694754	1.7051	0.178349	0.138182	-2.85536	0.00561851	0.0261196	down	yes
ENSSSCG00000008937	AMBN	ENSSSCT00000009789;ENSSSCT00000056703;ENSSSCT00000077591	GO:0005576(extracellular region);GO:0007155(cell adhesion);GO:0007165(signal transduction);GO:0008083(growth factor activity);GO:0030345(structural constituent of tooth enamel);GO:0031214(biomineral tissue development);GO:0042475(odontogenesis of dentin-containing tooth);GO:0042475(odontogenesis of dentin-containing tooth)	NA	NA	NA	ameloblastin [Source:VGNC Symbol;Acc:VGNC:85273]	protein_coding	43.9473	13.5896	19.2967	0.0304843	0.0132743	0.42377	164.34	7.36054	7.95719e-13	5.87891e-11	up	yes
ENSSSCG00000037591	AMMECR1	ENSSSCT00000050890	GO:0005634(nucleus);GO:0005654(nucleoplasm);GO:0005739(mitochondrion)	NA	NA	NA	AMMECR nuclear protein 1 [Source:VGNC Symbol;Acc:VGNC:96559]	protein_coding	1.77794	1.05497	1.12089	0.361824	0.555109	0.469925	2.8509	1.51142	0.045035	0.125992	up	yes
ENSSSCG00000011643	AMOTL2	ENSSSCT00000012744;ENSSSCT00000082049;ENSSSCT00000068334	GO:0001525(angiogenesis);GO:0003365(establishment of cell polarity involved in ameboidal cell migration);GO:0005886(plasma membrane);GO:0005923(bicellular tight junction);GO:0008150(biological_process);GO:0016324(apical plasma membrane);GO:0030036(actin cytoskeleton organization);GO:0030334(regulation of cell migration);GO:0031410(cytoplasmic vesicle);GO:0035329(hippo signaling);GO:0042802(identi…	04530(Tight junction);04530(Tight junction)	K06104	NA	angiomotin like 2 [Source:VGNC Symbol;Acc:VGNC:85285]	protein_coding	8.84151	32.56	26.1055	34.6194	56.5824	49.6832	0.479164	-1.06141	0.000809115	0.00569031	down	yes
ENSSSCG00000022492	AMPD3	ENSSSCT00000045384;ENSSSCT00000044142;ENSSSCT00000026707;ENSSSCT00000054636;ENSSSCT00000055623	GO:0003876(AMP deaminase activity);GO:0005829(cytosol);GO:0006188(IMP biosynthetic process);GO:0009168(purine ribonucleoside monophosphate biosynthetic process);GO:0016787(hydrolase activity);GO:0019239(deaminase activity);GO:0032264(IMP salvage);GO:0034101(erythrocyte homeostasis);GO:0046031(ADP metabolic process);GO:0046033(AMP metabolic process);GO:0046034(ATP metabolic process);GO:0046039(GTP…	00230(Purine metabolism);00230(Purine metabolism)	K01490	EC:3.5.4.6	adenosine monophosphate deaminase 3 [Source:VGNC Symbol;Acc:VGNC:85288]	protein_coding	1.654	1.79349	1.2599	3.54387	2.74585	5.22946	0.408657	-1.29104	9.60148e-06	0.000139623	down	yes
ENSSSCG00000033057	ANAPC13	ENSSSCT00000049560	GO:0005680(anaphase-promoting complex);GO:0007049(cell cycle);GO:0070979(protein K11-linked ubiquitination)	04110(Cell cycle);04114(Oocyte meiosis);04120(Ubiquitin mediated proteolysis);04914(Progesterone-mediated oocyte maturation)	K12456	NA	anaphase promoting complex subunit 13 [Source:VGNC Symbol;Acc:VGNC:85294]	protein_coding	19.5796	20.1214	25.2202	6.25754	7.92332	6.52509	3.13539	1.64865	0.000909364	0.00622748	up	yes
ENSSSCG00000014806	ANAPC15	ENSSSCT00000045153;ENSSSCT00000051873	GO:0005680(anaphase-promoting complex);GO:0090266(regulation of mitotic cell cycle spindle assembly checkpoint);GO:0090266(regulation of mitotic cell cycle spindle assembly checkpoint)	NA	NA	NA	anaphase promoting complex subunit 15 [Source:VGNC Symbol;Acc:VGNC:85295]	protein_coding	35.7534	45.2706	40.3749	16.086	14.2692	17.5638	2.53342	1.34109	0.00129401	0.00827854	up	yes
ENSSSCG00000025902	ANAPC4	ENSSSCT00000027484;ENSSSCT00000052951	GO:0005634(nucleus);GO:0005680(anaphase-promoting complex);GO:0007049(cell cycle);GO:0016567(protein ubiquitination);GO:0019903(protein phosphatase binding);GO:0030071(regulation of mitotic metaphase/anaphase transition);GO:0031145(anaphase-promoting complex-dependent catabolic process);GO:0034399(nuclear periphery);GO:0045842(positive regulation of mitotic metaphase/anaphase transition);GO:00513…	04110(Cell cycle);04114(Oocyte meiosis);04120(Ubiquitin mediated proteolysis);04914(Progesterone-mediated oocyte maturation);05166(Human T-cell leukemia virus 1 infection);05166(Human T-cell leukemia virus 1 infection)	K03351	NA	anaphase promoting complex subunit 4 [Source:VGNC Symbol;Acc:VGNC:85298]	protein_coding	0.475782	1.18309	0.710712	0.210762	0.272219	0.213297	3.40322	1.7669	0.024164	0.0795168	up	yes
ENSSSCG00000015588	ANGEL2	ENSSSCT00000016981;ENSSSCT00000042646;ENSSSCT00000038645;ENSSSCT00000062807;ENSSSCT00000049420	GO:0000175(3'-5'-exoribonuclease activity);GO:0003730(mRNA 3'-UTR binding);GO:0005737(cytoplasm);GO:0015030(Cajal body);GO:0045930(negative regulation of mitotic cell cycle);GO:0070935(3'-UTR-mediated mRNA stabilization);GO:0090503(RNA phosphodiester bond hydrolysis, exonucleolytic);GO:0090503(RNA phosphodiester bond hydrolysis, exonucleolytic)	NA	K18729	NA	angel homolog 2 [Source:VGNC Symbol;Acc:VGNC:85302]	protein_coding	4.76947	4.41091	4.39168	1.64403	1.67495	1.44355	2.84976	1.51084	0.000283299	0.00240463	up	yes
ENSSSCG00000006035	ANGPT1	ENSSSCT00000006624;ENSSSCT00000075145;ENSSSCT00000067730	GO:0001525(angiogenesis);GO:0001701(in utero embryonic development);GO:0001933(negative regulation of protein phosphorylation);GO:0001934(positive regulation of protein phosphorylation);GO:0002040(sprouting angiogenesis);GO:0002092(positive regulation of receptor internalization);GO:0002719(negative regulation of cytokine production involved in immune response);GO:0005102(signaling receptor bindi…	04010(MAPK signaling pathway);04014(Ras signaling pathway);04015(Rap1 signaling pathway);04066(HIF-1 signaling pathway);04151(PI3K-Akt signaling pathway);05323(Rheumatoid arthritis);05323(Rheumatoid arthritis)	K05465	NA	angiopoietin 1 [Source:VGNC Symbol;Acc:VGNC:98732]	protein_coding	1.64516	0.497457	0.985384	0.273769	0.232659	0.249593	4.13745	2.04874	0.00493227	0.0236	up	yes
ENSSSCG00000015753	ANGPT2	ENSSSCT00000078714;ENSSSCT00000017154	GO:0001525(angiogenesis);GO:0005102(signaling receptor binding);GO:0005576(extracellular region);GO:0005615(extracellular space);GO:0007275(multicellular organism development);GO:0010467(gene expression);GO:0010812(negative regulation of cell-substrate adhesion);GO:0016525(negative regulation of angiogenesis);GO:0030154(cell differentiation);GO:0030971(receptor tyrosine kinase binding);GO:0043537…	04010(MAPK signaling pathway);04014(Ras signaling pathway);04015(Rap1 signaling pathway);04066(HIF-1 signaling pathway);04151(PI3K-Akt signaling pathway);05167(Kaposi sarcoma-associated herpesvirus infection);05167(Kaposi sarcoma-associated herpesvirus infection)	K05466	NA	angiopoietin 2 [Source:NCBI gene (formerly Entrezgene);Acc:396730]	protein_coding	6.00304	4.63506	3.21088	2.16484	1.05518	1.7199	2.80348	1.48722	0.0032827	0.0171851	up	yes
ENSSSCG00000005608	ANGPTL2	ENSSSCT00000006167	GO:0001525(angiogenesis);GO:0005102(signaling receptor binding);GO:0005576(extracellular region);GO:0005615(extracellular space);GO:0062023(collagen-containing extracellular matrix)	NA	NA	NA	angiopoietin like 2 [Source:VGNC Symbol;Acc:VGNC:85304]	protein_coding	16.8474	17.1877	23.7834	53.1066	62.5464	90.2232	0.280841	-1.83217	6.03483e-12	3.67326e-10	down	yes
ENSSSCG00000014978	ANGPTL5	ENSSSCT00000016340	GO:0005576(extracellular region);GO:0005615(extracellular space);GO:0062023(collagen-containing extracellular matrix)	NA	NA	NA	angiopoietin like 5 [Source:VGNC Symbol;Acc:VGNC:85307]	protein_coding	0.592762	2.23802	3.02235	0.450917	0.220237	0.446582	5.23659	2.38863	0.00649208	0.0293759	up	yes
ENSSSCG00000003414	ANGPTL7	ENSSSCT00000058079;ENSSSCT00000003787	GO:0001525(angiogenesis);GO:0005102(signaling receptor binding);GO:0005576(extracellular region);GO:0005615(extracellular space);GO:0042802(identical protein binding);GO:0062023(collagen-containing extracellular matrix);GO:1901346(negative regulation of vasculature development involved in avascular cornea development in camera-type eye);GO:1903053(regulation of extracellular matrix organization);…	NA	NA	NA	angiopoietin like 7 [Source:VGNC Symbol;Acc:VGNC:85309]	protein_coding	23.6204	53.2699	32.034	65.1233	61.3045	125.087	0.433072	-1.20732	4.8203e-05	0.000552465	down	yes
ENSSSCG00000014083	ANKDD1B	ENSSSCT00000015384;ENSSSCT00000091243	GO:0007165(signal transduction);GO:0007165(signal transduction)	NA	NA	NA	ankyrin repeat and death domain containing 1B [Source:VGNC Symbol;Acc:VGNC:85312]	protein_coding	0.365121	0.604706	0.338292	0.012243	0.144859	0.074206	5.65531	2.49961	0.00803745	0.0343762	up	yes
ENSSSCG00000015314	ANKIB1	ENSSSCT00000055638	GO:0000151(ubiquitin ligase complex);GO:0000209(protein polyubiquitination);GO:0004842(ubiquitin-protein transferase activity);GO:0005737(cytoplasm);GO:0006511(ubiquitin-dependent protein catabolic process);GO:0016567(protein ubiquitination);GO:0016740(transferase activity);GO:0031624(ubiquitin conjugating enzyme binding);GO:0032436(positive regulation of proteasomal ubiquitin-dependent protein c…	NA	K11967	EC:2.3.2.31	ankyrin repeat and IBR domain containing 1 [Source:VGNC Symbol;Acc:VGNC:85316]	protein_coding	5.41425	4.818	4.29577	1.40158	1.66249	2.04885	2.84143	1.50662	0.000333072	0.00275065	up	yes
ENSSSCG00000010461	ANKRD1	ENSSSCT00000049949;ENSSSCT00000052592;ENSSSCT00000011447	GO:0001085(RNA polymerase II transcription factor binding);GO:0001650(fibrillar center);GO:0002039(p53 binding);GO:0003677(DNA binding);GO:0003713(transcription coactivator activity);GO:0003714(transcription corepressor activity);GO:0005634(nucleus);GO:0005654(nucleoplasm);GO:0005667(transcription factor complex);GO:0005737(cytoplasm);GO:0005829(cytosol);GO:0006357(regulation of transcription by …	NA	K21433	NA	ankyrin repeat domain 1 [Source:VGNC Symbol;Acc:VGNC:85321]	protein_coding	0.179927	0.170158	0.090194	0.247849	0.762868	0.204103	0.362424	-1.46425	0.0168031	0.0603914	down	yes
ENSSSCG00000010445	ANKRD22	ENSSSCT00000011430	GO:0016020(membrane);GO:0016021(integral component of membrane)	NA	NA	NA	ankyrin repeat domain 22 [Source:VGNC Symbol;Acc:VGNC:85329]	protein_coding	1.66916	1.30331	0.673395	0.0001	0.252567	0.060295	11.6495	3.5422	0.0018103	0.0107535	up	yes
ENSSSCG00000008200	ANKRD23	ENSSSCT00000008981	NA	NA	K21438	NA	ankyrin repeat domain 23 [Source:NCBI gene (formerly Entrezgene);Acc:100525457]	pseudogene	0.45288	0.176373	0.253911	1.86798	0.54973	2.79175	0.169531	-2.56038	0.000100248	0.00102273	down	yes
ENSSSCG00000011194	ANKRD28	ENSSSCT00000040406;ENSSSCT00000080460;ENSSSCT00000083470;ENSSSCT00000062689;ENSSSCT00000085216;ENSSSCT00000043002;ENSSSCT00000012259;ENSSSCT00000043480	NA	NA	K15502	NA	ankyrin repeat domain 28 [Source:VGNC Symbol;Acc:VGNC:85331]	protein_coding	2.53756	2.73072	1.86418	0.653086	1.21971	0.650009	2.82719	1.49937	0.00344862	0.0178766	up	yes
ENSSSCG00000039609	ANKRD33B	ENSSSCT00000063198	NA	NA	NA	NA	ankyrin repeat domain 33B [Source:VGNC Symbol;Acc:VGNC:85334]	protein_coding	2.71776	2.68201	3.2019	7.47017	6.26107	4.39038	0.474663	-1.07502	5.72101e-05	0.000637617	down	yes
ENSSSCG00000016074	ANKRD44	ENSSSCT00000041974;ENSSSCT00000051756;ENSSSCT00000078390;ENSSSCT00000017501;ENSSSCT00000059190;ENSSSCT00000046158	NA	NA	K15503	NA	ankyrin repeat domain 44 [Source:NCBI gene (formerly Entrezgene);Acc:100620944]	protein_coding	2.51856	1.4788	1.70794	0.535431	0.523519	0.425427	3.84357	1.94245	0.000169252	0.00157636	up	yes
ENSSSCG00000014956	ANKRD49	ENSSSCT00000016317	GO:0045893(positive regulation of transcription, DNA-templated)	NA	K21439	NA	ankyrin repeat domain 49 [Source:VGNC Symbol;Acc:VGNC:85340]	protein_coding	11.0829	10.551	10.0886	4.52854	4.80341	5.24778	2.17579	1.12154	0.0247734	0.0808717	up	yes
ENSSSCG00000022173	ANKRD50	ENSSSCT00000064453	GO:1990126(retrograde transport, endosome to plasma membrane)	NA	K21440	NA	ankyrin repeat domain 50 [Source:VGNC Symbol;Acc:VGNC:85341]	protein_coding	2.41923	1.95611	1.48622	0.443766	0.697083	0.67253	3.2324	1.6926	0.00097009	0.00653479	up	yes
ENSSSCG00000016658	ANLN	ENSSSCT00000072874;ENSSSCT00000018136;ENSSSCT00000057595;ENSSSCT00000053858;ENSSSCT00000050483;ENSSSCT00000060350	GO:0000281(mitotic cytokinesis);GO:0000915(actomyosin contractile ring assembly);GO:0002244(hematopoietic progenitor cell differentiation);GO:0003779(actin binding);GO:0005654(nucleoplasm);GO:0005826(actomyosin contractile ring);GO:0015629(actin cytoskeleton);GO:0017049(GTP-Rho binding);GO:0030496(midbody);GO:0030865(cortical cytoskeleton organization);GO:0031106(septin ring organization);GO:0032…	NA	K18621	NA	anillin actin binding protein [Source:VGNC Symbol;Acc:VGNC:85353]	protein_coding	2.1765	1.54992	1.02449	0.361084	0.149625	0.363104	5.43699	2.44281	0.000228155	0.00201757	up	yes
ENSSSCG00000013339	ANO3	ENSSSCT00000049311;ENSSSCT00000014567;ENSSSCT00000087757	GO:0005229(intracellular calcium activated chloride channel activity);GO:0005254(chloride channel activity);GO:0005886(plasma membrane);GO:0016020(membrane);GO:0016021(integral component of membrane);GO:0017128(phospholipid scramblase activity);GO:0046983(protein dimerization activity);GO:0055085(transmembrane transport);GO:0061588(calcium activated phospholipid scrambling);GO:0061590(calcium act…	NA	K19498	NA	anoctamin 3 [Source:VGNC Symbol;Acc:VGNC:85356]	protein_coding	0.341855	0.399466	0.289668	0.0713019	0.0816498	0.048768	5.111	2.35361	0.00212137	0.0121771	up	yes
ENSSSCG00000005267	ANXA1	ENSSSCT00000005802;ENSSSCT00000033404	GO:0001533(cornified envelope);GO:0001780(neutrophil homeostasis);GO:0001891(phagocytic cup);GO:0002250(adaptive immune response);GO:0002548(monocyte chemotaxis);GO:0002685(regulation of leukocyte migration);GO:0004859(phospholipase inhibitor activity);GO:0005509(calcium ion binding);GO:0005544(calcium-dependent phospholipid binding);GO:0005576(extracellular region);GO:0005615(extracellular space…	NA	K17091	NA	annexin A1 [Source:NCBI gene (formerly Entrezgene);Acc:396942]	protein_coding	84.8293	48.9479	48.9512	24.7966	30.7901	27.6986	2.19401	1.13357	0.00662856	0.029885	up	yes
ENSSSCG00000006643	ANXA9	ENSSSCT00000064954;ENSSSCT00000007279;ENSSSCT00000060028	GO:0001786(phosphatidylserine binding);GO:0002020(protease binding);GO:0005262(calcium channel activity);GO:0005509(calcium ion binding);GO:0005543(phospholipid binding);GO:0005544(calcium-dependent phospholipid binding);GO:0005546(phosphatidylinositol-4,5-bisphosphate binding);GO:0005615(extracellular space);GO:0005634(nucleus);GO:0005737(cytoplasm);GO:0005829(cytosol);GO:0005886(plasma membrane…	NA	K17090	NA	annexin A9 [Source:VGNC Symbol;Acc:VGNC:85373]	protein_coding	2.59846	2.17782	2.65724	0.21803	0.477333	0.392346	6.83411	2.77275	2.41067e-08	6.93041e-07	up	yes
ENSSSCG00000016657	AOAH	ENSSSCT00000034056;ENSSSCT00000039575;ENSSSCT00000033857	GO:0005509(calcium ion binding);GO:0008653(lipopolysaccharide metabolic process);GO:0016788(hydrolase activity, acting on ester bonds);GO:0050528(acyloxyacyl hydrolase activity);GO:0050728(negative regulation of inflammatory response);GO:0050728(negative regulation of inflammatory response)	NA	K01065	EC:3.1.1.77	acyloxyacyl hydrolase [Source:VGNC Symbol;Acc:VGNC:85374]	protein_coding	1.76401	0.528935	0.584748	0.073582	0.141452	0.099008	9.16342	3.19589	1.98296e-05	0.000260018	up	yes
ENSSSCG00000002015	AP1G2	ENSSSCT00000002254;ENSSSCT00000066171	GO:0005794(Golgi apparatus);GO:0005798(Golgi-associated vesicle);GO:0006886(intracellular protein transport);GO:0006896(Golgi to vacuole transport);GO:0006898(receptor-mediated endocytosis);GO:0015031(protein transport);GO:0016020(membrane);GO:0016192(vesicle-mediated transport);GO:0030117(membrane coat);GO:0030121(AP-1 adaptor complex);GO:0030133(transport vesicle);GO:0031410(cytoplasmic vesicle…	04142(Lysosome);05170(Human immunodeficiency virus 1 infection);05170(Human immunodeficiency virus 1 infection)	K12391	NA	adaptor related protein complex 1 subunit gamma 2 [Source:VGNC Symbol;Acc:VGNC:85379]	protein_coding	10.3062	11.2179	11.7004	4.4034	3.30306	4.68461	2.68133	1.42295	0.00125933	0.00809058	up	yes
ENSSSCG00000036074	AP1S2	ENSSSCT00000081951;ENSSSCT00000065448;ENSSSCT00000068080;ENSSSCT00000038550;ENSSSCT00000066682	GO:0006886(intracellular protein transport);GO:0015031(protein transport);GO:0016020(membrane);GO:0016192(vesicle-mediated transport);GO:0030117(membrane coat);GO:0043231(intracellular membrane-bounded organelle);GO:0043231(intracellular membrane-bounded organelle)	04142(Lysosome);05170(Human immunodeficiency virus 1 infection);05170(Human immunodeficiency virus 1 infection)	K12394	NA	adaptor related protein complex 1 subunit sigma 2 [Source:VGNC Symbol;Acc:VGNC:85382]	protein_coding	4.97712	2.51585	3.25412	0.677327	1.17945	0.980077	3.78838	1.92158	1.58276e-05	0.000214123	up	yes
ENSSSCG00000040847	AP1S3	ENSSSCT00000053618;ENSSSCT00000058586;ENSSSCT00000068421;ENSSSCT00000071903	GO:0006605(protein targeting);GO:0006886(intracellular protein transport);GO:0015031(protein transport);GO:0016020(membrane);GO:0016192(vesicle-mediated transport);GO:0030117(membrane coat);GO:0043231(intracellular membrane-bounded organelle);GO:0043231(intracellular membrane-bounded organelle)	04142(Lysosome);05170(Human immunodeficiency virus 1 infection);05170(Human immunodeficiency virus 1 infection)	K12395	NA	adaptor related protein complex 1 subunit sigma 3 [Source:VGNC Symbol;Acc:VGNC:95901]	protein_coding	1.17738	0.563703	1.00193	0.203824	0.309886	0.268937	3.50479	1.80933	0.0219845	0.0744482	up	yes
ENSSSCG00000003106	AP2S1	ENSSSCT00000040206;ENSSSCT00000073257;ENSSSCT00000082774;ENSSSCT00000072464;ENSSSCT00000080186;ENSSSCT00000029635	GO:0005886(plasma membrane);GO:0005905(clathrin-coated pit);GO:0006886(intracellular protein transport);GO:0015031(protein transport);GO:0016020(membrane);GO:0016192(vesicle-mediated transport);GO:0030117(membrane coat);GO:0030122(AP-2 adaptor complex);GO:0043231(intracellular membrane-bounded organelle);GO:0072583(clathrin-dependent endocytosis);GO:0072583(clathrin-dependent endocytosis)	04144(Endocytosis);04721(Synaptic vesicle cycle);04961(Endocrine and other factor-regulated calcium reabsorption);05016(Huntington disease);05016(Huntington disease)	K11827	NA	adaptor related protein complex 2 subunit sigma 1 [Source:VGNC Symbol;Acc:VGNC:96909]	protein_coding	105.439	90.6323	99.6151	27.3607	20.5475	21.9169	4.23466	2.08225	1.05989e-09	4.10283e-08	up	yes
ENSSSCG00000001807	AP3B2	ENSSSCT00000080895;ENSSSCT00000089909;ENSSSCT00000085197;ENSSSCT00000002023;ENSSSCT00000072468;ENSSSCT00000024280	GO:0006886(intracellular protein transport);GO:0008089(anterograde axonal transport);GO:0015031(protein transport);GO:0016020(membrane);GO:0016192(vesicle-mediated transport);GO:0030117(membrane coat);GO:0030123(AP-3 adaptor complex);GO:0030665(clathrin-coated vesicle membrane);GO:0048490(anterograde synaptic vesicle transport);GO:1904115(axon cytoplasm);GO:1904115(axon cytoplasm)	04142(Lysosome);04142(Lysosome)	K12397	NA	adaptor related protein complex 3 subunit beta 2 [Source:VGNC Symbol;Acc:VGNC:85388]	protein_coding	0.0773562	0.0164534	0.0407076	0.151926	0.209155	0.21112	0.235087	-2.08873	0.00244859	0.0136229	down	yes
ENSSSCG00000037595	AP3S1	ENSSSCT00000038543;ENSSSCT00000047844;ENSSSCT00000058971;ENSSSCT00000062758;ENSSSCT00000015538;ENSSSCT00000062841	GO:0006886(intracellular protein transport);GO:0008089(anterograde axonal transport);GO:0015031(protein transport);GO:0016020(membrane);GO:0016192(vesicle-mediated transport);GO:0030117(membrane coat);GO:0030123(AP-3 adaptor complex);GO:0043231(intracellular membrane-bounded organelle);GO:0048490(anterograde synaptic vesicle transport);GO:0048490(anterograde synaptic vesicle transport)	NA	NA	NA	adaptor related protein complex 3 subunit sigma 1 [Source:NCBI gene (formerly Entrezgene);Acc:100736866]	protein_coding	13.0528	11.078	10.7102	3.02056	3.84349	4.65284	3.0252	1.59703	6.29718e-05	0.000691164	up	yes
ENSSSCG00000005065	AP5M1	ENSSSCT00000037259;ENSSSCT00000072353;ENSSSCT00000052868;ENSSSCT00000005582	GO:0005764(lysosome);GO:0005765(lysosomal membrane);GO:0005770(late endosome);GO:0005829(cytosol);GO:0016020(membrane);GO:0016197(endosomal transport);GO:0030119(AP-type membrane coat adaptor complex);GO:0031902(late endosome membrane);GO:0031902(late endosome membrane)	NA	K19023	NA	adaptor related protein complex 5 subunit mu 1 [Source:VGNC Symbol;Acc:VGNC:85396]	protein_coding	2.28776	2.33564	2.16215	0.734135	0.664023	0.760323	3.14367	1.65245	0.00030726	0.00256835	up	yes
ENSSSCG00000030156	APBB1IP	ENSSSCT00000066108	GO:0002291(T cell activation via T cell receptor contact with antigen bound to MHC molecule on antigen presenting cell);GO:0005829(cytosol);GO:0005886(plasma membrane);GO:0007165(signal transduction);GO:0042101(T cell receptor complex);GO:0045785(positive regulation of cell adhesion)	04015(Rap1 signaling pathway);04611(Platelet activation)	K17704	NA	amyloid beta precursor protein binding family B member 1 interacting protein [Source:VGNC Symbol;Acc:VGNC:95848]	protein_coding	4.5542	2.60621	3.23324	0.468329	1.33335	0.601119	4.32565	2.11292	0.000933085	0.00635404	up	yes
ENSSSCG00000014207	APC	ENSSSCT00000066290;ENSSSCT00000089358;ENSSSCT00000046118;ENSSSCT00000053067;ENSSSCT00000057827;ENSSSCT00000057845;ENSSSCT00000058870;ENSSSCT00000063550;ENSSSCT00000062928	GO:0000281(mitotic cytokinesis);GO:0000776(kinetochore);GO:0005634(nucleus);GO:0005737(cytoplasm);GO:0005813(centrosome);GO:0005874(microtubule);GO:0005886(plasma membrane);GO:0005912(adherens junction);GO:0005923(bicellular tight junction);GO:0006974(cellular response to DNA damage stimulus);GO:0007026(negative regulation of microtubule depolymerization);GO:0007050(cell cycle arrest);GO:0007094(…	04310(Wnt signaling pathway);04390(Hippo signaling pathway);04550(Signaling pathways regulating pluripotency of stem cells);04810(Regulation of actin cytoskeleton);04934(Cushing syndrome);05165(Human papillomavirus infection);05200(Pathways in cancer);05206(MicroRNAs in cancer);05210(Colorectal cancer);05213(Endometrial cancer);05217(Basal cell carcinoma);05224(Breast cancer);05225(Hepatocellular…	K02085	NA	APC regulator of WNT signaling pathway [Source:VGNC Symbol;Acc:VGNC:99584]	protein_coding	4.96452	2.81483	2.77174	1.11439	1.04503	0.0456568	4.7849	2.25849	0.0080306	0.0343576	up	yes
ENSSSCG00000048443	APLN	ENSSSCT00000075387	GO:0001525(angiogenesis);GO:0005179(hormone activity);GO:0005576(extracellular region);GO:0005615(extracellular space);GO:0007165(signal transduction);GO:0007275(multicellular organism development);GO:0007369(gastrulation);GO:0010629(negative regulation of gene expression);GO:0031704(apelin receptor binding);GO:0040037(negative regulation of fibroblast growth factor receptor signaling pathway);GO…	04080(Neuroactive ligand-receptor interaction);04371(Apelin signaling pathway)	K05225	NA	apelin [Source:NCBI gene (formerly Entrezgene);Acc:100625006]	protein_coding	1.93349	4.75893	0.67547	0.071024	0.323698	0.044773	16.7644	4.06733	2.33748e-05	0.000298251	up	yes
ENSSSCG00000000091	APOBEC3B	ENSSSCT00000000097;ENSSSCT00000061182;ENSSSCT00000052388;ENSSSCT00000057047;ENSSSCT00000036902;ENSSSCT00000053908	GO:0003824(catalytic activity);GO:0008270(zinc ion binding);GO:0016787(hydrolase activity);GO:0046872(metal ion binding);GO:0046872(metal ion binding)	05170(Human immunodeficiency virus 1 infection);05170(Human immunodeficiency virus 1 infection)	K18750	EC:3.5.4.-	apolipoprotein B mRNA editing enzyme catalytic subunit 3B [Source:NCBI gene (formerly Entrezgene);Acc:100037939]	protein_coding	5.63209	4.00055	2.04463	1.02075	1.13217	1.42371	3.26489	1.70703	0.00291724	0.0155987	up	yes
ENSSSCG00000003088	APOE	ENSSSCT00000003426	GO:0001540(amyloid-beta binding);GO:0001937(negative regulation of endothelial cell proliferation);GO:0002021(response to dietary excess);GO:0005102(signaling receptor binding);GO:0005319(lipid transporter activity);GO:0005543(phospholipid binding);GO:0005576(extracellular region);GO:0005615(extracellular space);GO:0005783(endoplasmic reticulum);GO:0005794(Golgi apparatus);GO:0005886(plasma membr…	04979(Cholesterol metabolism);05010(Alzheimer disease)	K04524	NA	apolipoprotein E [Source:NCBI gene (formerly Entrezgene);Acc:397576]	protein_coding	1825.58	882.324	635.118	12.3514	16.757	13.6823	78.125	6.28771	1.35424e-41	3.10166e-38	up	yes
ENSSSCG00000032357	APPL1	ENSSSCT00000057301;ENSSSCT00000060109;ENSSSCT00000060859	GO:0001726(ruffle);GO:0001786(phosphatidylserine binding);GO:0005634(nucleus);GO:0005737(cytoplasm);GO:0005768(endosome);GO:0005769(early endosome);GO:0005829(cytosol);GO:0005886(plasma membrane);GO:0006606(protein import into nucleus);GO:0007049(cell cycle);GO:0007179(transforming growth factor beta receptor signaling pathway);GO:0008286(insulin receptor signaling pathway);GO:0010008(endosome me…	04211(Longevity regulating pathway);05200(Pathways in cancer);05210(Colorectal cancer);05210(Colorectal cancer)	K08733	NA	adaptor protein, phosphotyrosine interacting with PH domain and leucine zipper 1 [Source:VGNC Symbol;Acc:VGNC:85426]	protein_coding	5.40758	5.26973	5.72122	1.87836	2.6184	2.0889	2.49004	1.31617	0.00114691	0.00746959	up	yes
ENSSSCG00000004597	AQP9	ENSSSCT00000005078	GO:0005345(purine nucleobase transmembrane transporter activity);GO:0005350(pyrimidine nucleobase transmembrane transporter activity);GO:0005886(plasma membrane);GO:0005887(integral component of plasma membrane);GO:0006833(water transport);GO:0006863(purine nucleobase transport);GO:0010033(response to organic substance);GO:0015204(urea transmembrane transporter activity);GO:0015250(water channel …	04976(Bile secretion)	K09877	NA	aquaporin 9 [Source:VGNC Symbol;Acc:VGNC:85436]	protein_coding	0.370901	0.221146	0.394984	0.0001	0.06031	0.02318	11.808	3.56169	0.000909699	0.00622748	up	yes
ENSSSCG00000008768	ARAP2	ENSSSCT00000009593;ENSSSCT00000043895	GO:0005096(GTPase activator activity);GO:0005547(phosphatidylinositol-3,4,5-trisphosphate binding);GO:0005737(cytoplasm);GO:0007165(signal transduction);GO:0043547(positive regulation of GTPase activity);GO:0043547(positive regulation of GTPase activity)	04144(Endocytosis);04144(Endocytosis)	K18440	NA	ArfGAP with RhoGAP domain, ankyrin repeat and PH domain 2 [Source:VGNC Symbol;Acc:VGNC:85440]	protein_coding	0.271656	0.0418683	0.115097	0.0229002	0.0582912	0.0219802	4.15445	2.05466	0.0465104	0.128846	up	yes
ENSSSCG00000014391	ARAP3	ENSSSCT00000056738;ENSSSCT00000015728	GO:0001726(ruffle);GO:0005096(GTPase activator activity);GO:0005547(phosphatidylinositol-3,4,5-trisphosphate binding);GO:0005737(cytoplasm);GO:0007165(signal transduction);GO:0043325(phosphatidylinositol-3,4-bisphosphate binding);GO:0043547(positive regulation of GTPase activity);GO:0043547(positive regulation of GTPase activity)	04015(Rap1 signaling pathway);04024(cAMP signaling pathway);04144(Endocytosis);04144(Endocytosis)	K12490	NA	ArfGAP with RhoGAP domain, ankyrin repeat and PH domain 3 [Source:VGNC Symbol;Acc:VGNC:85441]	protein_coding	37.7963	21.9831	9.8553	10.7402	11.1567	7.11284	2.40039	1.26327	0.020868	0.0714064	up	yes
ENSSSCG00000009536	ARGLU1	ENSSSCT00000010454;ENSSSCT00000079262	GO:0005654(nucleoplasm);GO:0005739(mitochondrion);GO:0005829(cytosol);GO:0005829(cytosol)	NA	K13173	NA	arginine and glutamate rich 1 [Source:VGNC Symbol;Acc:VGNC:85456]	protein_coding	29.8644	37.8086	33.228	11.0856	13.0736	15.1502	2.56684	1.35999	0.000161246	0.00151562	up	yes
ENSSSCG00000011026	ARHGAP12	ENSSSCT00000056090;ENSSSCT00000045314;ENSSSCT00000045467;ENSSSCT00000042987;ENSSSCT00000062860;ENSSSCT00000012068;ENSSSCT00000050368;ENSSSCT00000066336;ENSSSCT00000041109	GO:0001891(phagocytic cup);GO:0002011(morphogenesis of an epithelial sheet);GO:0005096(GTPase activator activity);GO:0005737(cytoplasm);GO:0006911(phagocytosis, engulfment);GO:0007015(actin filament organization);GO:0007165(signal transduction);GO:0043087(regulation of GTPase activity);GO:0043547(positive regulation of GTPase activity);GO:0051058(negative regulation of small GTPase mediated signa…	NA	K20636	NA	Rho GTPase activating protein 12 [Source:VGNC Symbol;Acc:VGNC:95806]	protein_coding	6.45807	3.63468	3.8437	0.600821	1.07149	1.08925	5.04658	2.33531	1.19172e-06	2.25574e-05	up	yes
ENSSSCG00000015671	ARHGAP15	ENSSSCT00000027823;ENSSSCT00000017070;ENSSSCT00000050490	GO:0005096(GTPase activator activity);GO:0005737(cytoplasm);GO:0007165(signal transduction);GO:0008360(regulation of cell shape);GO:0043087(regulation of GTPase activity);GO:0043547(positive regulation of GTPase activity);GO:0043547(positive regulation of GTPase activity)	NA	K20637	NA	Rho GTPase activating protein 15 [Source:VGNC Symbol;Acc:VGNC:95959]	protein_coding	7.75125	2.77683	2.74092	0.183859	0.18496	0.129693	26.6171	4.73428	4.05385e-13	3.16523e-11	up	yes
ENSSSCG00000004205	ARHGAP18	ENSSSCT00000038797;ENSSSCT00000047609;ENSSSCT00000004646;ENSSSCT00000064357;ENSSSCT00000068000;ENSSSCT00000004647	GO:0001726(ruffle);GO:0005096(GTPase activator activity);GO:0005737(cytoplasm);GO:0005829(cytosol);GO:0005881(cytoplasmic microtubule);GO:0005886(plasma membrane);GO:0007165(signal transduction);GO:0007264(small GTPase mediated signal transduction);GO:0008360(regulation of cell shape);GO:0016607(nuclear speck);GO:0030833(regulation of actin filament polymerization);GO:0032956(regulation of actin …	NA	K20639	NA	Rho GTPase activating protein 18 [Source:VGNC Symbol;Acc:VGNC:85460]	protein_coding	8.71827	4.95926	3.42983	1.27185	1.55847	0.75459	4.77205	2.25461	1.00501e-05	0.00014492	up	yes
ENSSSCG00000010381	ARHGAP22	ENSSSCT00000044031;ENSSSCT00000088516;ENSSSCT00000045570;ENSSSCT00000022910;ENSSSCT00000011364;ENSSSCT00000073453	GO:0005096(GTPase activator activity);GO:0007165(signal transduction);GO:0043547(positive regulation of GTPase activity);GO:0090630(activation of GTPase activity);GO:0098978(glutamatergic synapse);GO:0099175(regulation of postsynapse organization);GO:0099175(regulation of postsynapse organization)	NA	K20642	NA	Rho GTPase activating protein 22 [Source:VGNC Symbol;Acc:VGNC:85461]	protein_coding	14.6597	9.1115	9.27578	2.28209	2.38679	2.75171	4.45342	2.15491	1.23787e-07	2.99486e-06	up	yes
ENSSSCG00000018058	ARHGAP23	ENSSSCT00000053573	GO:0005096(GTPase activator activity);GO:0007165(signal transduction);GO:0043547(positive regulation of GTPase activity)	NA	K20315	NA	Rho GTPase activating protein 23 [Source:VGNC Symbol;Acc:VGNC:85462]	protein_coding	4.34354	6.13842	4.68604	15.0075	14.4663	15.2347	0.339264	-1.55952	3.0235e-10	1.26674e-08	down	yes
ENSSSCG00000008344	ARHGAP25	ENSSSCT00000062874;ENSSSCT00000009138;ENSSSCT00000039146;ENSSSCT00000039831	GO:0001891(phagocytic cup);GO:0005096(GTPase activator activity);GO:0006911(phagocytosis, engulfment);GO:0007015(actin filament organization);GO:0007165(signal transduction);GO:0043547(positive regulation of GTPase activity);GO:0051058(negative regulation of small GTPase mediated signal transduction);GO:0051058(negative regulation of small GTPase mediated signal transduction)	NA	K20642	NA	Rho GTPase activating protein 25 [Source:VGNC Symbol;Acc:VGNC:85464]	protein_coding	15.6469	5.77194	3.9765	3.16686	2.13384	1.16333	3.92871	1.97406	0.00110591	0.00726107	up	yes
ENSSSCG00000017328	ARHGAP27	ENSSSCT00000018864;ENSSSCT00000043205	GO:0005096(GTPase activator activity);GO:0005737(cytoplasm);GO:0007165(signal transduction);GO:0043087(regulation of GTPase activity);GO:0043547(positive regulation of GTPase activity);GO:0043547(positive regulation of GTPase activity)	NA	K20636	NA	Rho GTPase activating protein 27 [Source:VGNC Symbol;Acc:VGNC:85466]	protein_coding	10.557	5.51911	4.04159	3.50953	3.04592	1.72248	2.43028	1.28112	0.022593	0.0759632	up	yes
ENSSSCG00000021612	ARHGAP28	ENSSSCT00000069626;ENSSSCT00000083595;ENSSSCT00000081292;ENSSSCT00000028129;ENSSSCT00000075862	GO:0005096(GTPase activator activity);GO:0005737(cytoplasm);GO:0007165(signal transduction);GO:0030833(regulation of actin filament polymerization);GO:0032956(regulation of actin cytoskeleton organization);GO:0043547(positive regulation of GTPase activity);GO:0051056(regulation of small GTPase mediated signal transduction);GO:0051497(negative regulation of stress fiber assembly);GO:1904425(negati…	NA	K20639	NA	Rho GTPase activating protein 28 [Source:VGNC Symbol;Acc:VGNC:85467]	protein_coding	1.34739	0.650855	0.462881	0.269596	0.320168	0.265369	2.87806	1.5251	0.0307577	0.094621	up	yes
ENSSSCG00000006372	ARHGAP30	ENSSSCT00000043112;ENSSSCT00000006982	GO:0007165(signal transduction);GO:0043231(intracellular membrane-bounded organelle);GO:0043231(intracellular membrane-bounded organelle)	NA	K20645	NA	Rho GTPase activating protein 30 [Source:VGNC Symbol;Acc:VGNC:85469]	protein_coding	24.404	9.0491	5.82775	0.431756	0.581147	0.916624	20.3577	4.34751	2.20105e-14	2.11517e-12	up	yes
ENSSSCG00000012790	ARHGAP4	ENSSSCT00000013982	GO:0005737(cytoplasm);GO:0007165(signal transduction)	NA	K20122	NA	Rho GTPase activating protein 4 [Source:VGNC Symbol;Acc:VGNC:85476]	protein_coding	19.6483	7.39001	8.17203	1.02797	0.595859	0.880689	14.0587	3.81339	4.44237e-14	4.09712e-12	up	yes
ENSSSCG00000027565	ARHGAP45	ENSSSCT00000043837;ENSSSCT00000074153;ENSSSCT00000042796;ENSSSCT00000031323	GO:0005096(GTPase activator activity);GO:0007165(signal transduction);GO:0035556(intracellular signal transduction);GO:0043547(positive regulation of GTPase activity);GO:0090630(activation of GTPase activity);GO:0090630(activation of GTPase activity)	NA	K20644	NA	Rho GTPase activating protein 45 [Source:VGNC Symbol;Acc:VGNC:85479]	protein_coding	37.6682	15.9917	11.1781	1.8347	1.56591	1.74007	12.6127	3.65681	3.93374e-15	4.32459e-13	up	yes
ENSSSCG00000001966	ARHGAP5	ENSSSCT00000002199;ENSSSCT00000065462;ENSSSCT00000060419	GO:0003924(GTPase activity);GO:0005525(GTP binding);GO:0005783(endoplasmic reticulum);GO:0005829(cytosol);GO:0007165(signal transduction);GO:0042169(SH2 domain binding);GO:0042169(SH2 domain binding)	04510(Focal adhesion);04670(Leukocyte transendothelial migration);04670(Leukocyte transendothelial migration)	K13709	NA	Rho GTPase activating protein 5 [Source:VGNC Symbol;Acc:VGNC:85480]	protein_coding	3.59393	2.26878	2.24653	1.07322	0.906819	1.03328	2.69113	1.42821	0.00377688	0.0192443	up	yes
ENSSSCG00000000437	ARHGAP9	ENSSSCT00000000472;ENSSSCT00000000473;ENSSSCT00000088959	GO:0005096(GTPase activator activity);GO:0005547(phosphatidylinositol-3,4,5-trisphosphate binding);GO:0005737(cytoplasm);GO:0007165(signal transduction);GO:0043087(regulation of GTPase activity);GO:0043547(positive regulation of GTPase activity);GO:0043547(positive regulation of GTPase activity)	NA	K20634	NA	Rho GTPase activating protein 9 [Source:VGNC Symbol;Acc:VGNC:85482]	protein_coding	4.84494	1.29569	1.37371	0.235308	0.303011	0.145119	10.9949	3.45876	4.8896e-06	7.72468e-05	up	yes
ENSSSCG00000033337	ARHGDIB	ENSSSCT00000059811	GO:0003924(GTPase activity);GO:0005094(Rho GDP-dissociation inhibitor activity);GO:0005096(GTPase activator activity);GO:0005737(cytoplasm);GO:0005829(cytosol);GO:0007266(Rho protein signal transduction);GO:0016020(membrane);GO:0035023(regulation of Rho protein signal transduction);GO:0043547(positive regulation of GTPase activity);GO:0048365(Rac GTPase binding);GO:0050790(regulation of catalytic…	04722(Neurotrophin signaling pathway);04962(Vasopressin-regulated water reabsorption)	K12462	NA	Rho GDP dissociation inhibitor beta [Source:VGNC Symbol;Acc:VGNC:85484]	protein_coding	158.453	89.7976	79.0716	29.6187	30.9095	39.5415	3.27094	1.70971	1.4692e-05	0.000201094	up	yes
ENSSSCG00000030359	ARHGEF3	ENSSSCT00000057110;ENSSSCT00000022976;ENSSSCT00000038289;ENSSSCT00000055049	GO:0005085(guanyl-nucleotide exchange factor activity);GO:0005089(Rho guanyl-nucleotide exchange factor activity);GO:0035025(positive regulation of Rho protein signal transduction);GO:0035556(intracellular signal transduction);GO:0035556(intracellular signal transduction)	NA	K20683	NA	Rho guanine nucleotide exchange factor 3 [Source:VGNC Symbol;Acc:VGNC:85496]	protein_coding	6.19003	2.01025	2.76744	1.22939	2.25051	0.793886	2.56627	1.35968	0.0356562	0.105874	up	yes
ENSSSCG00000021764	ARHGEF38	ENSSSCT00000030948	GO:0005085(guanyl-nucleotide exchange factor activity);GO:0005089(Rho guanyl-nucleotide exchange factor activity);GO:0005737(cytoplasm)	NA	K20711	NA	Rho guanine nucleotide exchange factor 38 [Source:VGNC Symbol;Acc:VGNC:85499]	protein_coding	0.344069	0.311368	0.373512	0.057492	0.048469	0.086126	5.35668	2.42134	0.00230517	0.0129561	up	yes
ENSSSCG00000004064	ARID1B	ENSSSCT00000049334;ENSSSCT00000058325;ENSSSCT00000043067;ENSSSCT00000004493;ENSSSCT00000053144	GO:0003677(DNA binding);GO:0005634(nucleus);GO:0005654(nucleoplasm);GO:0005829(cytosol);GO:0005886(plasma membrane);GO:0006338(chromatin remodeling);GO:0006357(regulation of transcription by RNA polymerase II);GO:0007270(neuron-neuron synaptic transmission);GO:0016514(SWI/SNF complex);GO:0031491(nucleosome binding);GO:0035060(brahma complex);GO:0043044(ATP-dependent chromatin remodeling);GO:00452…	04714(Thermogenesis);05225(Hepatocellular carcinoma);05225(Hepatocellular carcinoma)	K11653	NA	AT-rich interaction domain 1B [Source:VGNC Symbol;Acc:VGNC:85506]	protein_coding	2.94135	2.44671	2.81649	6.80793	5.55233	6.34959	0.438515	-1.1893	1.29848e-07	3.12498e-06	down	yes
ENSSSCG00000036810	ARL11	ENSSSCT00000063027	GO:0000166(nucleotide binding);GO:0002244(hematopoietic progenitor cell differentiation);GO:0005525(GTP binding);GO:0005737(cytoplasm);GO:0005886(plasma membrane);GO:0006886(intracellular protein transport);GO:0016192(vesicle-mediated transport)	NA	NA	NA	ADP ribosylation factor like GTPase 11 [Source:HGNC Symbol;Acc:HGNC:24046]	protein_coding	2.38739	1.94163	1.06081	0.173324	0.0001	0.046585	24.4982	4.6146	2.82289e-05	0.000347912	up	yes
ENSSSCG00000032709	ARL4A	ENSSSCT00000072139;ENSSSCT00000056123	GO:0000166(nucleotide binding);GO:0005525(GTP binding);GO:0005634(nucleus);GO:0005654(nucleoplasm);GO:0005730(nucleolus);GO:0005737(cytoplasm);GO:0005829(cytosol);GO:0005886(plasma membrane);GO:0006886(intracellular protein transport);GO:0016192(vesicle-mediated transport);GO:0050873(brown fat cell differentiation);GO:0050873(brown fat cell differentiation)	NA	K07945	NA	ADP ribosylation factor like GTPase 4A [Source:VGNC Symbol;Acc:VGNC:85522]	protein_coding	3.24391	1.92062	2.22054	1.2425	1.17246	0.535329	2.50317	1.32376	0.0312327	0.0958464	up	yes
ENSSSCG00000034293	ARL4C	ENSSSCT00000041906	GO:0000166(nucleotide binding);GO:0005525(GTP binding);GO:0005737(cytoplasm);GO:0005829(cytosol);GO:0005886(plasma membrane);GO:0006886(intracellular protein transport);GO:0016192(vesicle-mediated transport);GO:0032456(endocytic recycling);GO:0043014(alpha-tubulin binding)	NA	K07945	NA	ADP ribosylation factor like GTPase 4C [Source:VGNC Symbol;Acc:VGNC:96419]	protein_coding	28.3436	10.3513	8.85431	1.44588	1.38982	2.19064	9.46002	3.24184	7.70887e-09	2.45221e-07	up	yes
ENSSSCG00000031541	ARL5A	ENSSSCT00000047745;ENSSSCT00000038014	GO:0000166(nucleotide binding);GO:0005525(GTP binding);GO:0005737(cytoplasm);GO:0005802(trans-Golgi network);GO:0006886(intracellular protein transport);GO:0016192(vesicle-mediated transport);GO:1903292(protein localization to Golgi membrane);GO:1903292(protein localization to Golgi membrane)	NA	K07949	NA	ADP ribosylation factor like GTPase 5A [Source:VGNC Symbol;Acc:VGNC:96418]	protein_coding	11.7655	7.23476	5.65501	3.00919	4.75508	1.86627	2.56012	1.35621	0.0069589	0.0309279	up	yes
ENSSSCG00000031456	ARL5B	ENSSSCT00000059248;ENSSSCT00000066395	GO:0000166(nucleotide binding);GO:0005525(GTP binding);GO:0005737(cytoplasm);GO:0005802(trans-Golgi network);GO:0006886(intracellular protein transport);GO:0016192(vesicle-mediated transport);GO:1903292(protein localization to Golgi membrane);GO:1903292(protein localization to Golgi membrane)	NA	K07950	NA	ADP ribosylation factor like GTPase 5B [Source:VGNC Symbol;Acc:VGNC:95985]	protein_coding	5.64564	1.92727	2.892	1.06414	1.12829	0.881814	3.40405	1.76725	0.000438897	0.00345239	up	yes
ENSSSCG00000036967	ARL8A	ENSSSCT00000038003;ENSSSCT00000081596	GO:0000166(nucleotide binding);GO:0005525(GTP binding);GO:0005737(cytoplasm);GO:0005765(lysosomal membrane);GO:0005774(vacuolar membrane);GO:0008089(anterograde axonal transport);GO:0030496(midbody);GO:0051233(spindle midzone);GO:1904115(axon cytoplasm);GO:1904115(axon cytoplasm)	NA	K07955	NA	ADP ribosylation factor like GTPase 8A [Source:VGNC Symbol;Acc:VGNC:96067]	protein_coding	30.655	36.6871	27.3864	9.18822	11.4369	14.0498	2.73191	1.44991	0.000171694	0.00159313	up	yes
ENSSSCG00000006220	ARMC1	ENSSSCT00000006816	GO:0030001(metal ion transport);GO:0046872(metal ion binding)	NA	K17306	NA	armadillo repeat containing 1 [Source:VGNC Symbol;Acc:VGNC:85526]	protein_coding	8.41526	7.6734	8.46816	3.02251	2.62992	4.21871	2.48774	1.31483	0.00434508	0.0214862	up	yes
ENSSSCG00000001550	ARMC12	ENSSSCT00000087278;ENSSSCT00000001728	NA	NA	NA	NA	armadillo repeat containing 12 [Source:VGNC Symbol;Acc:VGNC:85528]	protein_coding	0.00726262	0.213097	0.241441	0.827245	0.575693	0.143557	0.298611	-1.74366	0.0304726	0.0939966	down	yes
ENSSSCG00000012518	ARMCX5	ENSSSCT00000042287;ENSSSCT00000055461;ENSSSCT00000076698;ENSSSCT00000076671;ENSSSCT00000013687	NA	NA	NA	NA	armadillo repeat containing X-linked 5 [Source:HGNC Symbol;Acc:HGNC:25772]	protein_coding	0.123797	0.127369	0.194368	0.394791	0.774683	0.786494	0.227782	-2.13428	2.54606e-05	0.000318943	down	yes
ENSSSCG00000012508	ARMCX6	ENSSSCT00000013677;ENSSSCT00000035571;ENSSSCT00000034205	GO:0016020(membrane);GO:0016021(integral component of membrane);GO:0016021(integral component of membrane)	NA	NA	NA	protein ARMCX6 [Source:NCBI gene (formerly Entrezgene);Acc:100520992]	protein_coding	10.118	8.13407	7.47086	2.34559	2.06807	3.869	3.10564	1.63489	0.00166835	0.0100998	up	yes
ENSSSCG00000004088	ARMT1	ENSSSCT00000004519;ENSSSCT00000091635	GO:0006479(protein methylation);GO:0008168(methyltransferase activity);GO:0008757(S-adenosylmethionine-dependent methyltransferase activity);GO:0016311(dephosphorylation);GO:0016787(hydrolase activity);GO:0016791(phosphatase activity);GO:0019899(enzyme binding);GO:0032259(methylation);GO:0046872(metal ion binding);GO:0051998(protein carboxyl O-methyltransferase activity);GO:2001020(regulation of …	NA	K23114	EC:2.1.1.-	acidic residue methyltransferase 1 [Source:VGNC Symbol;Acc:VGNC:85536]	protein_coding	1.61285	0.965369	1.44338	0.26941	0.21412	0.204454	5.84548	2.54732	4.24213e-05	0.00049361	up	yes
ENSSSCG00000040288	ARNT2	ENSSSCT00000044157;ENSSSCT00000048996;ENSSSCT00000001996;ENSSSCT00000061153;ENSSSCT00000083663	GO:0000978(RNA polymerase II cis-regulatory region sequence-specific DNA binding);GO:0000981(DNA-binding transcription factor activity, RNA polymerase II-specific);GO:0001228(DNA-binding transcription activator activity, RNA polymerase II-specific);GO:0001666(response to hypoxia);GO:0001701(in utero embryonic development);GO:0003677(DNA binding);GO:0003700(DNA-binding transcription factor activit…	05200(Pathways in cancer);05202(Transcriptional misregulation in cancer);05211(Renal cell carcinoma);05211(Renal cell carcinoma)	K15589	NA	aryl hydrocarbon receptor nuclear translocator 2 [Source:NCBI gene (formerly Entrezgene);Acc:100157219]	protein_coding	0.379638	0.872389	0.942996	2.12821	2.42166	1.89569	0.340548	-1.55407	2.71945e-05	0.000337281	down	yes
ENSSSCG00000007625	ARPC1B	ENSSSCT00000055470;ENSSSCT00000008365	GO:0003779(actin binding);GO:0005200(structural constituent of cytoskeleton);GO:0005634(nucleus);GO:0005737(cytoplasm);GO:0005856(cytoskeleton);GO:0005885(Arp2/3 protein complex);GO:0015629(actin cytoskeleton);GO:0030833(regulation of actin filament polymerization);GO:0034314(Arp2/3 complex-mediated actin nucleation);GO:0051015(actin filament binding);GO:0051015(actin filament binding)	04144(Endocytosis);04666(Fc gamma R-mediated phagocytosis);04810(Regulation of actin cytoskeleton);05100(Bacterial invasion of epithelial cells);05132(Salmonella infection);05132(Salmonella infection)	K05757	NA	actin related protein 2/3 complex subunit 1B [Source:VGNC Symbol;Acc:VGNC:85537]	protein_coding	156.961	102.73	73.943	46.6148	52.2006	53.4516	2.19111	1.13166	0.00877634	0.0368116	up	yes
ENSSSCG00000015560	ARPC5	ENSSSCT00000016950	GO:0005200(structural constituent of cytoskeleton);GO:0005737(cytoplasm);GO:0005856(cytoskeleton);GO:0005885(Arp2/3 protein complex);GO:0015629(actin cytoskeleton);GO:0016477(cell migration);GO:0030027(lamellipodium);GO:0030833(regulation of actin filament polymerization);GO:0034314(Arp2/3 complex-mediated actin nucleation);GO:0051015(actin filament binding)	04144(Endocytosis);04666(Fc gamma R-mediated phagocytosis);04810(Regulation of actin cytoskeleton);05100(Bacterial invasion of epithelial cells);05132(Salmonella infection)	K05754	NA	actin related protein 2/3 complex subunit 5 [Source:VGNC Symbol;Acc:VGNC:85539]	protein_coding	107.229	71.5044	70.2704	30.056	41.0925	34.6163	2.35432	1.23531	0.0014642	0.00907581	up	yes
ENSSSCG00000014852	ARRB1	ENSSSCT00000060023;ENSSSCT00000037787;ENSSSCT00000078702;ENSSSCT00000016204;ENSSSCT00000079624;ENSSSCT00000067266;ENSSSCT00000071078;ENSSSCT00000047738;ENSSSCT00000066592	GO:0000785(chromatin);GO:0001664(G protein-coupled receptor binding);GO:0001934(positive regulation of protein phosphorylation);GO:0002031(G protein-coupled receptor internalization);GO:0002092(positive regulation of receptor internalization);GO:0003713(transcription coactivator activity);GO:0005096(GTPase activator activity);GO:0005159(insulin-like growth factor receptor binding);GO:0005634(nucl…	04010(MAPK signaling pathway);04062(Chemokine signaling pathway);04144(Endocytosis);04340(Hedgehog signaling pathway);04740(Olfactory transduction);04926(Relaxin signaling pathway);04928(Parathyroid hormone synthesis, secretion and action);05032(Morphine addiction);05032(Morphine addiction)	K04439	NA	arrestin beta 1 [Source:VGNC Symbol;Acc:VGNC:85542]	protein_coding	27.8721	15.0076	10.8417	4.80574	5.15106	3.68181	3.93892	1.9778	3.0268e-06	5.10359e-05	up	yes
ENSSSCG00000017918	ARRB2	ENSSSCT00000019500;ENSSSCT00000090451;ENSSSCT00000063192	GO:0001664(G protein-coupled receptor binding);GO:0001932(regulation of protein phosphorylation);GO:0001933(negative regulation of protein phosphorylation);GO:0001934(positive regulation of protein phosphorylation);GO:0002031(G protein-coupled receptor internalization);GO:0002032(desensitization of G protein-coupled receptor signaling pathway by arrestin);GO:0002092(positive regulation of recepto…	04010(MAPK signaling pathway);04062(Chemokine signaling pathway);04144(Endocytosis);04340(Hedgehog signaling pathway);04740(Olfactory transduction);04926(Relaxin signaling pathway);04928(Parathyroid hormone synthesis, secretion and action);05032(Morphine addiction);05032(Morphine addiction)	K04439	NA	arrestin beta 2 [Source:VGNC Symbol;Acc:VGNC:85543]	protein_coding	55.2422	23.7455	30.4411	4.52038	5.29296	5.65247	7.07553	2.82284	3.03573e-12	1.95854e-10	up	yes
ENSSSCG00000002252	ARRDC4	ENSSSCT00000002508	GO:0005737(cytoplasm);GO:0005768(endosome);GO:0005886(plasma membrane);GO:0015031(protein transport);GO:0016567(protein ubiquitination);GO:0043231(intracellular membrane-bounded organelle);GO:0051443(positive regulation of ubiquitin-protein transferase activity);GO:0140112(extracellular vesicle biogenesis);GO:1903561(extracellular vesicle);GO:1990756(ubiquitin ligase-substrate adaptor activity)	NA	NA	NA	arrestin domain containing 4 [Source:VGNC Symbol;Acc:VGNC:85547]	protein_coding	11.1686	6.9877	6.97991	2.59175	3.44552	3.28576	2.69614	1.43089	0.00115338	0.00750104	up	yes
ENSSSCG00000014139	ARSK	ENSSSCT00000015443	GO:0003824(catalytic activity);GO:0008484(sulfuric ester hydrolase activity)	NA	K12376	EC:3.1.6.-	arylsulfatase family member K [Source:VGNC Symbol;Acc:VGNC:85550]	protein_coding	3.26417	2.23835	1.97464	0.623958	1.45816	0.91661	2.49344	1.31814	0.0287606	0.0902142	up	yes
ENSSSCG00000006995	ASAH1	ENSSSCT00000064630;ENSSSCT00000007660;ENSSSCT00000086781;ENSSSCT00000079288;ENSSSCT00000074398	GO:0005615(extracellular space);GO:0005634(nucleus);GO:0005764(lysosome);GO:0006629(lipid metabolic process);GO:0016787(hydrolase activity);GO:0016810(hydrolase activity, acting on carbon-nitrogen (but not peptide) bonds);GO:0016811(hydrolase activity, acting on carbon-nitrogen (but not peptide) bonds, in linear amides);GO:0017040(N-acylsphingosine amidohydrolase activity);GO:0030216(keratinocyte…	00600(Sphingolipid metabolism);04071(Sphingolipid signaling pathway);04142(Lysosome);04142(Lysosome)	K12348	EC:3.5.1.23	N-acylsphingosine amidohydrolase 1 [Source:VGNC Symbol;Acc:VGNC:96424]	protein_coding	53.5679	25.2948	21.9679	5.82077	8.18244	9.67561	4.25826	2.09026	1.08725e-06	2.07227e-05	up	yes
ENSSSCG00000016340	ASB1	ENSSSCT00000075151;ENSSSCT00000017795;ENSSSCT00000057209;ENSSSCT00000079594;ENSSSCT00000089269	GO:0000151(ubiquitin ligase complex);GO:0016567(protein ubiquitination);GO:0030539(male genitalia development);GO:0035556(intracellular signal transduction);GO:0061630(ubiquitin protein ligase activity);GO:0061630(ubiquitin protein ligase activity)	NA	K10323	NA	ankyrin repeat and SOCS box containing 1 [Source:VGNC Symbol;Acc:VGNC:95728]	protein_coding	0.272566	1.21839	0.267871	2.1675	1.98683	2.51579	0.263687	-1.9231	4.6977e-05	0.000541121	down	yes
ENSSSCG00000002467	ASB2	ENSSSCT00000049938;ENSSSCT00000002739	GO:0000151(ubiquitin ligase complex);GO:0006511(ubiquitin-dependent protein catabolic process);GO:0016567(protein ubiquitination);GO:0035914(skeletal muscle cell differentiation);GO:0061630(ubiquitin protein ligase activity);GO:0061630(ubiquitin protein ligase activity)	NA	K10324	NA	ankyrin repeat and SOCS box containing 2 [Source:VGNC Symbol;Acc:VGNC:85564]	protein_coding	6.58301	14.7176	11.3611	23.1156	16.2013	26.445	0.496665	-1.00965	0.00011697	0.00115884	down	yes
ENSSSCG00000013772	ASF1B	ENSSSCT00000045769;ENSSSCT00000015047	GO:0000785(chromatin);GO:0000790(nuclear chromatin);GO:0001835(blastocyst hatching);GO:0005634(nucleus);GO:0005654(nucleoplasm);GO:0006333(chromatin assembly or disassembly);GO:0006334(nucleosome assembly);GO:0006335(DNA replication-dependent nucleosome assembly);GO:0006336(DNA replication-independent nucleosome assembly);GO:0032991(protein-containing complex);GO:0042393(histone binding);GO:00423…	NA	K10753	NA	anti-silencing function 1B histone chaperone [Source:VGNC Symbol;Acc:VGNC:85574]	protein_coding	2.07523	1.35371	1.12177	0.547802	0.15889	0.292577	4.55404	2.18715	0.00804239	0.0343866	up	yes
ENSSSCG00000017861	ASPA	ENSSSCT00000037506;ENSSSCT00000056972;ENSSSCT00000019437	GO:0005829(cytosol);GO:0016787(hydrolase activity);GO:0016788(hydrolase activity, acting on ester bonds);GO:0016811(hydrolase activity, acting on carbon-nitrogen (but not peptide) bonds, in linear amides);GO:0042802(identical protein binding);GO:0046872(metal ion binding);GO:0046872(metal ion binding)	00250(Alanine, aspartate and glutamate metabolism);00340(Histidine metabolism);00340(Histidine metabolism)	K01437	EC:3.5.1.15	aspartoacylase [Source:VGNC Symbol;Acc:VGNC:85582]	protein_coding	1.7477	1.00053	1.04322	0.144096	0.0990171	0.0660127	12.2651	3.61649	2.80707e-07	6.21173e-06	up	yes
ENSSSCG00000015513	ASTN1	ENSSSCT00000026733;ENSSSCT00000079439;ENSSSCT00000068877;ENSSSCT00000016900	GO:0001764(neuron migration);GO:0005768(endosome);GO:0007158(neuron cell-cell adhesion);GO:0007626(locomotory behavior);GO:0009897(external side of plasma membrane);GO:0016020(membrane);GO:0016021(integral component of membrane);GO:0016477(cell migration);GO:0098609(cell-cell adhesion);GO:0098609(cell-cell adhesion)	NA	NA	NA	astrotactin 1 [Source:VGNC Symbol;Acc:VGNC:85593]	protein_coding	0.0270631	0.0001	0.0111677	0.242544	0.0993139	0.0108546	0.108675	-3.20191	0.0042213	0.0210407	down	yes
ENSSSCG00000008575	ASXL2	ENSSSCT00000062944;ENSSSCT00000086753;ENSSSCT00000009382	GO:0000790(nuclear chromatin);GO:0003677(DNA binding);GO:0003682(chromatin binding);GO:0005634(nucleus);GO:0005654(nucleoplasm);GO:0006351(transcription, DNA-templated);GO:0006355(regulation of transcription, DNA-templated);GO:0009887(animal organ morphogenesis);GO:0035360(positive regulation of peroxisome proliferator activated receptor signaling pathway);GO:0035517(PR-DUB complex);GO:0042975(pe…	NA	K11471	NA	ASXL transcriptional regulator 2 [Source:VGNC Symbol;Acc:VGNC:85595]	protein_coding	3.20399	2.19444	2.25997	1.13856	0.916883	1.25455	2.31372	1.21021	0.013916	0.0524072	up	yes
ENSSSCG00000010438	ATAD1	ENSSSCT00000011423	GO:0000166(nucleotide binding);GO:0002092(positive regulation of receptor internalization);GO:0005524(ATP binding);GO:0007612(learning);GO:0007613(memory);GO:0016887(ATPase activity);GO:0045211(postsynaptic membrane);GO:0051967(negative regulation of synaptic transmission, glutamatergic);GO:0098794(postsynapse);GO:0098978(glutamatergic synapse);GO:0099149(regulation of postsynaptic neurotransmitt…	NA	K22530	EC:3.6.1.-	ATPase family AAA domain containing 1 [Source:VGNC Symbol;Acc:VGNC:85598]	protein_coding	4.29233	3.40187	3.48606	1.12921	1.95778	1.88874	2.24695	1.16797	0.0117827	0.0461699	up	yes
ENSSSCG00000008591	ATAD2B	ENSSSCT00000066132	GO:0003682(chromatin binding);GO:0005524(ATP binding);GO:0005634(nucleus);GO:0005654(nucleoplasm);GO:0016887(ATPase activity);GO:0031936(negative regulation of chromatin silencing);GO:0042393(histone binding);GO:0045944(positive regulation of transcription by RNA polymerase II);GO:0070577(lysine-acetylated histone binding)	NA	K22531	EC:3.6.1.-	ATPase family AAA domain containing 2B [Source:VGNC Symbol;Acc:VGNC:85600]	protein_coding	2.18837	1.89324	1.99685	0.801633	1.0947	0.997299	2.10064	1.07083	0.0450327	0.125992	up	yes
ENSSSCG00000035954	ATAD5	ENSSSCT00000039682;ENSSSCT00000069931;ENSSSCT00000038407;ENSSSCT00000057511	GO:0002377(immunoglobulin production);GO:0003677(DNA binding);GO:0005524(ATP binding);GO:0005634(nucleus);GO:0006974(cellular response to DNA damage stimulus);GO:0008630(intrinsic apoptotic signaling pathway in response to DNA damage);GO:0030890(positive regulation of B cell proliferation);GO:0031391(Elg1 RFC-like complex);GO:0042770(signal transduction in response to DNA damage);GO:0042771(intri…	NA	NA	NA	ATPase family AAA domain containing 5 [Source:VGNC Symbol;Acc:VGNC:85601]	protein_coding	0.682354	0.306774	0.170758	0.0607872	0.0277424	0.0631137	7.64878	2.93523	0.000650842	0.00478671	up	yes
ENSSSCG00000038076	ATF2	ENSSSCT00000017391;ENSSSCT00000063886;ENSSSCT00000047269;ENSSSCT00000083765;ENSSSCT00000090882;ENSSSCT00000039068	GO:0000790(nuclear chromatin);GO:0000977(RNA polymerase II regulatory region sequence-specific DNA binding);GO:0000978(RNA polymerase II cis-regulatory region sequence-specific DNA binding);GO:0000987(cis-regulatory region sequence-specific DNA binding);GO:0001102(RNA polymerase II activating transcription factor binding);GO:0001228(DNA-binding transcription activator activity, RNA polymerase II-…	04010(MAPK signaling pathway);04022(cGMP-PKG signaling pathway);04151(PI3K-Akt signaling pathway);04211(Longevity regulating pathway);04261(Adrenergic signaling in cardiomyocytes);04668(TNF signaling pathway);04714(Thermogenesis);04728(Dopaminergic synapse);04911(Insulin secretion);04915(Estrogen signaling pathway);04918(Thyroid hormone synthesis);04922(Glucagon signaling pathway);04925(Aldostero…	K04450	NA	activating transcription factor 2 [Source:VGNC Symbol;Acc:VGNC:96446]	protein_coding	4.23813	2.61573	1.84439	0.518853	0.698917	0.751461	4.41708	2.14309	7.18835e-06	0.000108195	up	yes
ENSSSCG00000015595	ATF3	ENSSSCT00000080815;ENSSSCT00000016988;ENSSSCT00000033171;ENSSSCT00000080586	GO:0000122(negative regulation of transcription by RNA polymerase II);GO:0000976(transcription regulatory region sequence-specific DNA binding);GO:0000977(RNA polymerase II regulatory region sequence-specific DNA binding);GO:0000978(RNA polymerase II cis-regulatory region sequence-specific DNA binding);GO:0000981(DNA-binding transcription factor activity, RNA polymerase II-specific);GO:0001227(DN…	NA	K09032	NA	activating transcription factor 3 [Source:VGNC Symbol;Acc:VGNC:85606]	protein_coding	68.1365	15.0945	15.909	9.23401	16.8514	4.19493	3.27408	1.71109	0.0135984	0.0514476	up	yes
ENSSSCG00000003201	ATF5	ENSSSCT00000003556	GO:0000976(transcription regulatory region sequence-specific DNA binding);GO:0000977(RNA polymerase II regulatory region sequence-specific DNA binding);GO:0001228(DNA-binding transcription activator activity, RNA polymerase II-specific);GO:0003682(chromatin binding);GO:0003700(DNA-binding transcription factor activity);GO:0005634(nucleus);GO:0005654(nucleoplasm);GO:0005667(transcription factor co…	NA	K09044	NA	activating transcription factor 5 [Source:VGNC Symbol;Acc:VGNC:85608]	protein_coding	11.8888	16.3096	11.5578	7.91901	6.20473	3.34316	2.27609	1.18656	0.0332685	0.100633	up	yes
ENSSSCG00000000612	ATF7IP	ENSSSCT00000022782;ENSSSCT00000052005;ENSSSCT00000039361;ENSSSCT00000000658	GO:0000122(negative regulation of transcription by RNA polymerase II);GO:0003714(transcription corepressor activity);GO:0005634(nucleus);GO:0005654(nucleoplasm);GO:0005667(transcription factor complex);GO:0005829(cytosol);GO:0006306(DNA methylation);GO:0016604(nuclear body);GO:0016887(ATPase activity);GO:0031647(regulation of protein stability);GO:0045892(negative regulation of transcription, DNA…	NA	NA	NA	activating transcription factor 7 interacting protein [Source:VGNC Symbol;Acc:VGNC:85611]	protein_coding	6.50986	4.33841	5.23608	3.2266	2.02006	2.70059	2.02389	1.01713	0.0313862	0.0962099	up	yes
ENSSSCG00000033912	ATG12	ENSSSCT00000049974;ENSSSCT00000088479	GO:0000045(autophagosome assembly);GO:0000422(autophagy of mitochondrion);GO:0005737(cytoplasm);GO:0005776(autophagosome);GO:0006501(C-terminal protein lipidation);GO:0006914(autophagy);GO:0016020(membrane);GO:0019776(Atg8 ligase activity);GO:0034045(phagophore assembly site membrane);GO:0034274(Atg12-Atg5-Atg16 complex);GO:0044804(autophagy of nucleus);GO:0044804(autophagy of nucleus)	04068(FoxO signaling pathway);04136(Autophagy - other);04140(Autophagy - animal);04621(NOD-like receptor signaling pathway);04622(RIG-I-like receptor signaling pathway);04622(RIG-I-like receptor signaling pathway)	K08336	NA	autophagy related 12 [Source:VGNC Symbol;Acc:VGNC:85615]	protein_coding	8.50459	7.36598	8.38544	2.89044	3.40338	4.98058	2.15142	1.10529	0.00998831	0.0406815	up	yes
ENSSSCG00000011930	ATG3	ENSSSCT00000013054;ENSSSCT00000082594;ENSSSCT00000074195;ENSSSCT00000091171	GO:0000045(autophagosome assembly);GO:0000153(cytoplasmic ubiquitin ligase complex);GO:0000422(autophagy of mitochondrion);GO:0005737(cytoplasm);GO:0005829(cytosol);GO:0006464(cellular protein modification process);GO:0006914(autophagy);GO:0015031(protein transport);GO:0016236(macroautophagy);GO:0016567(protein ubiquitination);GO:0019776(Atg8 ligase activity);GO:0019777(Atg12 transferase activity…	04136(Autophagy - other);04140(Autophagy - animal);05167(Kaposi sarcoma-associated herpesvirus infection);05167(Kaposi sarcoma-associated herpesvirus infection)	K08343	NA	autophagy related 3 [Source:VGNC Symbol;Acc:VGNC:85621]	protein_coding	23.7868	19.866	19.4289	6.85429	7.71931	8.04536	2.78889	1.47969	0.000105775	0.00106723	up	yes
ENSSSCG00000003816	ATG4C	ENSSSCT00000050413;ENSSSCT00000004223	GO:0004197(cysteine-type endopeptidase activity);GO:0005737(cytoplasm);GO:0006508(proteolysis);GO:0006914(autophagy);GO:0008233(peptidase activity);GO:0008234(cysteine-type peptidase activity);GO:0015031(protein transport);GO:0016787(hydrolase activity);GO:0016787(hydrolase activity)	04136(Autophagy - other);04140(Autophagy - animal);04140(Autophagy - animal)	K08342	EC:3.4.22.-	autophagy related 4C cysteine peptidase [Source:VGNC Symbol;Acc:VGNC:85623]	protein_coding	0.967788	0.787026	0.681487	0.187378	0.221209	0.287471	3.50014	1.80741	0.00315974	0.016694	up	yes
ENSSSCG00000008812	ATP10D	ENSSSCT00000009642;ENSSSCT00000046466	GO:0000166(nucleotide binding);GO:0000287(magnesium ion binding);GO:0005524(ATP binding);GO:0005654(nucleoplasm);GO:0005783(endoplasmic reticulum);GO:0005886(plasma membrane);GO:0015914(phospholipid transport);GO:0016020(membrane);GO:0016021(integral component of membrane);GO:0034204(lipid translocation);GO:0045332(phospholipid translocation);GO:0046872(metal ion binding);GO:0140326(ATPase-couple…	NA	K01530	EC:7.6.2.1	ATPase phospholipid transporting 10D (putative) [Source:VGNC Symbol;Acc:VGNC:98913]	protein_coding	3.37654	3.62582	1.99819	0.736053	1.04347	1.48781	2.75471	1.4619	0.00530068	0.0249118	up	yes
ENSSSCG00000012713	ATP11C	ENSSSCT00000046314;ENSSSCT00000036522;ENSSSCT00000038310;ENSSSCT00000063255;ENSSSCT00000053041;ENSSSCT00000065618;ENSSSCT00000013899;ENSSSCT00000049594;ENSSSCT00000035711;ENSSSCT00000044077	GO:0000166(nucleotide binding);GO:0000287(magnesium ion binding);GO:0002329(pre-B cell differentiation);GO:0005524(ATP binding);GO:0005783(endoplasmic reticulum);GO:0005802(trans-Golgi network);GO:0005886(plasma membrane);GO:0015914(phospholipid transport);GO:0016020(membrane);GO:0016021(integral component of membrane);GO:0045332(phospholipid translocation);GO:0045579(positive regulation of B cel…	NA	K01530	EC:7.6.2.1	ATPase phospholipid transporting 11C [Source:VGNC Symbol;Acc:VGNC:85635]	protein_coding	3.1024	2.52985	0.589225	0.80084	0.907736	0.590117	2.70653	1.43644	0.0447769	0.125448	up	yes
ENSSSCG00000017951	ATP1B2	ENSSSCT00000019535	GO:0001671(ATPase activator activity);GO:0001895(retina homeostasis);GO:0001917(photoreceptor inner segment);GO:0005391(sodium:potassium-exchanging ATPase activity);GO:0005737(cytoplasm);GO:0005886(plasma membrane);GO:0005890(sodium:potassium-exchanging ATPase complex);GO:0006811(ion transport);GO:0006813(potassium ion transport);GO:0006814(sodium ion transport);GO:0006883(cellular sodium ion hom…	04022(cGMP-PKG signaling pathway);04024(cAMP signaling pathway);04260(Cardiac muscle contraction);04261(Adrenergic signaling in cardiomyocytes);04911(Insulin secretion);04918(Thyroid hormone synthesis);04919(Thyroid hormone signaling pathway);04925(Aldosterone synthesis and secretion);04960(Aldosterone-regulated sodium reabsorption);04961(Endocrine and other factor-regulated calcium reabsorption)…	K01540	NA	ATPase Na+/K+ transporting subunit beta 2 [Source:VGNC Symbol;Acc:VGNC:85643]	protein_coding	4.51378	1.55577	2.83627	7.94786	13.9041	10.6286	0.27419	-1.86675	1.44874e-07	3.44439e-06	down	yes
ENSSSCG00000027898	ATP2B1	ENSSSCT00000059392;ENSSSCT00000001006;ENSSSCT00000048359;ENSSSCT00000001005;ENSSSCT00000046212;ENSSSCT00000069086	GO:0000166(nucleotide binding);GO:0001772(immunological synapse);GO:0001818(negative regulation of cytokine production);GO:0003056(regulation of vascular smooth muscle contraction);GO:0005388(calcium transmembrane transporter activity, phosphorylative mechanism);GO:0005524(ATP binding);GO:0005654(nucleoplasm);GO:0005886(plasma membrane);GO:0006811(ion transport);GO:0006816(calcium ion transport);…	04020(Calcium signaling pathway);04022(cGMP-PKG signaling pathway);04024(cAMP signaling pathway);04261(Adrenergic signaling in cardiomyocytes);04925(Aldosterone synthesis and secretion);04970(Salivary secretion);04972(Pancreatic secretion);04972(Pancreatic secretion)	K05850	EC:7.2.2.10	ATPase plasma membrane Ca2+ transporting 1 [Source:NCBI gene (formerly Entrezgene);Acc:397636]	protein_coding	6.0914	3.83955	2.92225	0.337639	0.626645	0.799739	7.2863	2.86519	4.48857e-11	2.28452e-09	up	yes
ENSSSCG00000017544	ATP5MC1	ENSSSCT00000074300;ENSSSCT00000019098;ENSSSCT00000080701	GO:0000276(mitochondrial proton-transporting ATP synthase complex, coupling factor F(o));GO:0005739(mitochondrion);GO:0006811(ion transport);GO:0008289(lipid binding);GO:0015078(proton transmembrane transporter activity);GO:0015986(ATP synthesis coupled proton transport);GO:0016020(membrane);GO:0016021(integral component of membrane);GO:0033177(proton-transporting two-sector ATPase complex, proto…	00190(Oxidative phosphorylation);04714(Thermogenesis);05010(Alzheimer disease);05012(Parkinson disease);05016(Huntington disease);05016(Huntington disease)	K02128	NA	ATP synthase membrane subunit c locus 1 [Source:NCBI gene (formerly Entrezgene);Acc:574054]	protein_coding	34.9713	41.4247	35.6771	12.2096	10.5641	11.64	3.25664	1.70339	5.88639e-06	8.99786e-05	up	yes
ENSSSCG00000015973	ATP5MC3	ENSSSCT00000042612;ENSSSCT00000047000;ENSSSCT00000017392	GO:0000276(mitochondrial proton-transporting ATP synthase complex, coupling factor F(o));GO:0006811(ion transport);GO:0008289(lipid binding);GO:0015078(proton transmembrane transporter activity);GO:0015986(ATP synthesis coupled proton transport);GO:0016020(membrane);GO:0016021(integral component of membrane);GO:0033177(proton-transporting two-sector ATPase complex, proton-transporting domain);GO:…	00190(Oxidative phosphorylation);04714(Thermogenesis);05010(Alzheimer disease);05012(Parkinson disease);05016(Huntington disease);05016(Huntington disease)	K02128	NA	ATP synthase membrane subunit c locus 3 [Source:NCBI gene (formerly Entrezgene);Acc:100513629]	protein_coding	6.99228	7.1497	6.8266	3.22417	2.90301	3.04853	2.28523	1.19234	0.00200308	0.0116489	up	yes
ENSSSCG00000032165	ATP5MD	ENSSSCT00000010958	GO:0005739(mitochondrion);GO:0005753(mitochondrial proton-transporting ATP synthase complex);GO:0016020(membrane);GO:0016021(integral component of membrane)	NA	K18194	NA	ATP synthase membrane subunit DAPIT [Source:VGNC Symbol;Acc:VGNC:85657]	protein_coding	90.6685	115.132	109.493	19.1999	22.2798	23.7229	4.83559	2.27369	7.58821e-10	3.01379e-08	up	yes
ENSSSCG00000023903	ATP5ME	ENSSSCT00000025595	GO:0000276(mitochondrial proton-transporting ATP synthase complex, coupling factor F(o));GO:0005739(mitochondrion);GO:0005743(mitochondrial inner membrane);GO:0006811(ion transport);GO:0015078(proton transmembrane transporter activity);GO:0015986(ATP synthesis coupled proton transport);GO:0016020(membrane)	00190(Oxidative phosphorylation);04714(Thermogenesis)	K02129	NA	ATP synthase membrane subunit e [Source:VGNC Symbol;Acc:VGNC:85658]	protein_coding	24.4879	31.024	31.5124	3.8233	3.73753	2.43121	8.70936	3.12257	7.36517e-17	1.03278e-14	up	yes
ENSSSCG00000038399	ATP5PF	ENSSSCT00000045597;ENSSSCT00000066019	GO:0000276(mitochondrial proton-transporting ATP synthase complex, coupling factor F(o));GO:0005739(mitochondrion);GO:0005743(mitochondrial inner membrane);GO:0005753(mitochondrial proton-transporting ATP synthase complex);GO:0006811(ion transport);GO:0015078(proton transmembrane transporter activity);GO:0015986(ATP synthesis coupled proton transport);GO:0016020(membrane);GO:0042776(mitochondrial…	00190(Oxidative phosphorylation);04714(Thermogenesis);05010(Alzheimer disease);05012(Parkinson disease);05016(Huntington disease);05016(Huntington disease)	K02131	NA	ATP synthase peripheral stalk subunit F6 [Source:NCBI gene (formerly Entrezgene);Acc:100622245]	protein_coding	25.2348	30.5437	31.1846	9.46554	9.11795	9.45106	3.102	1.6332	1.65151e-06	3.00996e-05	up	yes
ENSSSCG00000018081	ATP6	ENSSSCT00000019676	GO:0005739(mitochondrion);GO:0005743(mitochondrial inner membrane);GO:0005753(mitochondrial proton-transporting ATP synthase complex);GO:0006754(ATP biosynthetic process);GO:0006811(ion transport);GO:0015078(proton transmembrane transporter activity);GO:0015986(ATP synthesis coupled proton transport);GO:0016020(membrane);GO:0016021(integral component of membrane);GO:0042776(mitochondrial ATP synt…	00190(Oxidative phosphorylation);04714(Thermogenesis);05010(Alzheimer disease);05012(Parkinson disease);05016(Huntington disease)	K02126	NA	ATP synthase F0 subunit 6 [Source:NCBI gene (formerly Entrezgene);Acc:808506]	protein_coding	3486.65	3097.03	2197.38	296.569	656.726	301.058	7.00046	2.80745	5.3944e-12	3.30937e-10	up	yes
ENSSSCG00000037310	ATP6AP1	ENSSSCT00000060452;ENSSSCT00000068747;ENSSSCT00000074254	GO:0006879(cellular iron ion homeostasis);GO:0016020(membrane);GO:0016021(integral component of membrane);GO:0017137(Rab GTPase binding);GO:0030641(regulation of cellular pH);GO:0033180(proton-transporting V-type ATPase, V1 domain);GO:0033181(plasma membrane proton-transporting V-type ATPase complex);GO:0036295(cellular response to increased oxygen levels);GO:0045669(positive regulation of osteob…	00190(Oxidative phosphorylation);04142(Lysosome);04145(Phagosome);05152(Tuberculosis);05161(Hepatitis B);05165(Human papillomavirus infection);05323(Rheumatoid arthritis);05323(Rheumatoid arthritis)	K03662	NA	ATPase H+ transporting accessory protein 1 [Source:VGNC Symbol;Acc:VGNC:85660]	protein_coding	72.2389	53.9477	41.0643	25.1152	25.4628	28.5508	2.11366	1.07974	0.00867287	0.0365506	up	yes
ENSSSCG00000012247	ATP6AP2	ENSSSCT00000065986;ENSSSCT00000067815;ENSSSCT00000013393;ENSSSCT00000083750;ENSSSCT00000083245;ENSSSCT00000090996	GO:0000421(autophagosome membrane);GO:0002003(angiotensin maturation);GO:0003824(catalytic activity);GO:0005764(lysosome);GO:0005783(endoplasmic reticulum);GO:0005789(endoplasmic reticulum membrane);GO:0005886(plasma membrane);GO:0007042(lysosomal lumen acidification);GO:0009897(external side of plasma membrane);GO:0016020(membrane);GO:0016021(integral component of membrane);GO:0016471(vacuolar p…	04614(Renin-angiotensin system);04614(Renin-angiotensin system)	K19514	NA	ATPase H+ transporting accessory protein 2 [Source:VGNC Symbol;Acc:VGNC:85662]	protein_coding	22.197	21.7911	19.8408	9.08717	9.65745	9.32342	2.27408	1.18528	0.00110703	0.00726497	up	yes
ENSSSCG00000017401	ATP6V0A1	ENSSSCT00000018941;ENSSSCT00000018946;ENSSSCT00000066140;ENSSSCT00000065605;ENSSSCT00000058628;ENSSSCT00000063144;ENSSSCT00000079907;ENSSSCT00000069817	GO:0000220(vacuolar proton-transporting V-type ATPase, V0 domain);GO:0005737(cytoplasm);GO:0005794(Golgi apparatus);GO:0005829(cytosol);GO:0005886(plasma membrane);GO:0006811(ion transport);GO:0007035(vacuolar acidification);GO:0015078(proton transmembrane transporter activity);GO:0016020(membrane);GO:0016021(integral component of membrane);GO:0016241(regulation of macroautophagy);GO:0016471(vacu…	00190(Oxidative phosphorylation);04142(Lysosome);04145(Phagosome);04721(Synaptic vesicle cycle);04966(Collecting duct acid secretion);05152(Tuberculosis);05165(Human papillomavirus infection);05323(Rheumatoid arthritis);05323(Rheumatoid arthritis)	K02154	NA	ATPase H+ transporting V0 subunit a1 [Source:VGNC Symbol;Acc:VGNC:85663]	protein_coding	22.5025	14.2197	12.2231	7.00294	7.79822	9.12804	2.04542	1.0324	0.0182041	0.064173	up	yes
ENSSSCG00000009766	ATP6V0A2	ENSSSCT00000010708	GO:0000220(vacuolar proton-transporting V-type ATPase, V0 domain);GO:0001669(acrosomal vesicle);GO:0005886(plasma membrane);GO:0006811(ion transport);GO:0006879(cellular iron ion homeostasis);GO:0007035(vacuolar acidification);GO:0015078(proton transmembrane transporter activity);GO:0016020(membrane);GO:0016021(integral component of membrane);GO:0016471(vacuolar proton-transporting V-type ATPase …	00190(Oxidative phosphorylation);04142(Lysosome);04145(Phagosome);04721(Synaptic vesicle cycle);04966(Collecting duct acid secretion);05152(Tuberculosis);05165(Human papillomavirus infection);05323(Rheumatoid arthritis)	K02154	NA	ATPase H+ transporting V0 subunit a2 [Source:VGNC Symbol;Acc:VGNC:85664]	protein_coding	2.72977	2.9175	2.90315	1.08662	1.50132	1.48811	2.09772	1.06882	0.0468097	0.129298	up	yes
ENSSSCG00000039267	ATP6V0B	ENSSSCT00000041877	GO:0006811(ion transport);GO:0015078(proton transmembrane transporter activity);GO:0016020(membrane);GO:0016021(integral component of membrane);GO:0033177(proton-transporting two-sector ATPase complex, proton-transporting domain);GO:0033179(proton-transporting V-type ATPase, V0 domain);GO:0046961(proton-transporting ATPase activity, rotational mechanism);GO:1902600(proton transmembrane transport)	00190(Oxidative phosphorylation);04142(Lysosome);04145(Phagosome);04721(Synaptic vesicle cycle);05152(Tuberculosis);05165(Human papillomavirus infection);05323(Rheumatoid arthritis)	K03661	NA	ATPase H+ transporting V0 subunit b [Source:VGNC Symbol;Acc:VGNC:85666]	protein_coding	84.4674	61.6059	64.1361	18.4767	20.2777	22.6044	3.4259	1.77649	1.95123e-07	4.49459e-06	up	yes
ENSSSCG00000006138	ATP6V0D2	ENSSSCT00000006731	GO:0005765(lysosomal membrane);GO:0005769(early endosome);GO:0006811(ion transport);GO:0007034(vacuolar transport);GO:0007035(vacuolar acidification);GO:0008553(proton-exporting ATPase activity, phosphorylative mechanism);GO:0015078(proton transmembrane transporter activity);GO:0016020(membrane);GO:0016324(apical plasma membrane);GO:0016471(vacuolar proton-transporting V-type ATPase complex);GO:0…	00190(Oxidative phosphorylation);04142(Lysosome);04145(Phagosome);04721(Synaptic vesicle cycle);04966(Collecting duct acid secretion);05152(Tuberculosis);05165(Human papillomavirus infection);05203(Viral carcinogenesis);05323(Rheumatoid arthritis)	K02146	NA	ATPase H+ transporting V0 subunit d2 [Source:VGNC Symbol;Acc:VGNC:85668]	protein_coding	9.22008	6.32849	3.72574	0.0001	0.0001	0.3235	59.5438	5.89588	1.40604e-05	0.0001938	up	yes
ENSSSCG00000011916	ATP6V1A	ENSSSCT00000080156;ENSSSCT00000013040;ENSSSCT00000042306;ENSSSCT00000039822	GO:0000166(nucleotide binding);GO:0005524(ATP binding);GO:0005829(cytosol);GO:0005886(plasma membrane);GO:0005902(microvillus);GO:0006811(ion transport);GO:0006879(cellular iron ion homeostasis);GO:0015986(ATP synthesis coupled proton transport);GO:0016324(apical plasma membrane);GO:0033180(proton-transporting V-type ATPase, V1 domain);GO:0036295(cellular response to increased oxygen levels);GO:0…	00190(Oxidative phosphorylation);04145(Phagosome);04150(mTOR signaling pathway);04721(Synaptic vesicle cycle);04966(Collecting duct acid secretion);05165(Human papillomavirus infection);05323(Rheumatoid arthritis);05323(Rheumatoid arthritis)	K02145	EC:7.1.2.2	ATPase H+ transporting V1 subunit A [Source:VGNC Symbol;Acc:VGNC:85669]	protein_coding	9.51784	5.20445	5.2988	1.22821	1.47156	2.11352	4.15955	2.05643	1.56836e-06	2.88135e-05	up	yes
ENSSSCG00000016577	ATP6V1F	ENSSSCT00000018047	GO:0006811(ion transport);GO:0016020(membrane);GO:0016471(vacuolar proton-transporting V-type ATPase complex);GO:0033180(proton-transporting V-type ATPase, V1 domain);GO:0034220(ion transmembrane transport);GO:0042625(ATPase-coupled ion transmembrane transporter activity);GO:0046961(proton-transporting ATPase activity, rotational mechanism);GO:1902600(proton transmembrane transport)	00190(Oxidative phosphorylation);04145(Phagosome);04150(mTOR signaling pathway);04721(Synaptic vesicle cycle);04966(Collecting duct acid secretion);05165(Human papillomavirus infection);05323(Rheumatoid arthritis)	K02151	NA	ATPase H+ transporting V1 subunit F [Source:VGNC Symbol;Acc:VGNC:85676]	protein_coding	78.6314	72.0587	62.919	34.5612	30.3957	22.3034	2.44795	1.29158	0.00183116	0.0108464	up	yes
ENSSSCG00000012437	ATP7A	ENSSSCT00000081432;ENSSSCT00000066838;ENSSSCT00000013601;ENSSSCT00000082081	GO:0000166(nucleotide binding);GO:0005507(copper ion binding);GO:0005524(ATP binding);GO:0005770(late endosome);GO:0005794(Golgi apparatus);GO:0005802(trans-Golgi network);GO:0005886(plasma membrane);GO:0006812(cation transport);GO:0006825(copper ion transport);GO:0006878(cellular copper ion homeostasis);GO:0016020(membrane);GO:0016021(integral component of membrane);GO:0016323(basolateral plasma…	01524(Platinum drug resistance);01524(Platinum drug resistance)	K17686	EC:7.2.2.8	ATPase copper transporting alpha [Source:VGNC Symbol;Acc:VGNC:85678]	protein_coding	1.24326	0.791642	0.250816	0.12983	0.180346	0.257705	4.025	2.00899	0.00657261	0.0296815	up	yes
ENSSSCG00000018080	ATP8	ENSSSCT00000019675	GO:0000276(mitochondrial proton-transporting ATP synthase complex, coupling factor F(o));GO:0005739(mitochondrion);GO:0005753(mitochondrial proton-transporting ATP synthase complex);GO:0006754(ATP biosynthetic process);GO:0006811(ion transport);GO:0015078(proton transmembrane transporter activity);GO:0015986(ATP synthesis coupled proton transport);GO:0016020(membrane);GO:0016021(integral componen…	00190(Oxidative phosphorylation);04714(Thermogenesis);05010(Alzheimer disease);05012(Parkinson disease);05016(Huntington disease)	K02125	NA	mitochondrially encoded ATP synthase membrane subunit 8 [Source:VGNC Symbol;Acc:VGNC:99789]	protein_coding	1130.1	1087.53	614.517	364.501	353.23	404.877	2.52284	1.33505	0.000808975	0.00569031	up	yes
ENSSSCG00000008803	ATP8A1	ENSSSCT00000073017;ENSSSCT00000073160;ENSSSCT00000088267;ENSSSCT00000044098;ENSSSCT00000072839;ENSSSCT00000009632;ENSSSCT00000084985;ENSSSCT00000087965;ENSSSCT00000069429	GO:0000166(nucleotide binding);GO:0000287(magnesium ion binding);GO:0005524(ATP binding);GO:0005783(endoplasmic reticulum);GO:0005794(Golgi apparatus);GO:0005802(trans-Golgi network);GO:0005886(plasma membrane);GO:0006869(lipid transport);GO:0007612(learning);GO:0015914(phospholipid transport);GO:0016020(membrane);GO:0016021(integral component of membrane);GO:0016887(ATPase activity);GO:0022857(t…	NA	K14802	EC:7.6.2.1	ATPase phospholipid transporting 8A1 [Source:VGNC Symbol;Acc:VGNC:97894]	protein_coding	1.58015	0.512361	0.61735	0.0647819	0.104759	0.150378	8.47047	3.08244	4.09844e-06	6.64944e-05	up	yes
ENSSSCG00000004646	ATP8B4	ENSSSCT00000005131;ENSSSCT00000061016	GO:0000166(nucleotide binding);GO:0000287(magnesium ion binding);GO:0005524(ATP binding);GO:0005794(Golgi apparatus);GO:0005802(trans-Golgi network);GO:0005886(plasma membrane);GO:0007030(Golgi organization);GO:0015914(phospholipid transport);GO:0016020(membrane);GO:0016021(integral component of membrane);GO:0034204(lipid translocation);GO:0045332(phospholipid translocation);GO:0046872(metal ion …	NA	K01530	EC:7.6.2.1	ATPase phospholipid transporting 8B4 (putative) [Source:NCBI gene (formerly Entrezgene);Acc:100154720]	protein_coding	4.34943	2.02417	1.9504	0.047912	0.135981	0.076486	31.9688	4.99859	1.53742e-15	1.80575e-13	up	yes
ENSSSCG00000011679	ATR	ENSSSCT00000012786	GO:0000077(DNA damage checkpoint);GO:0000166(nucleotide binding);GO:0000723(telomere maintenance);GO:0004672(protein kinase activity);GO:0004674(protein serine/threonine kinase activity);GO:0005524(ATP binding);GO:0005634(nucleus);GO:0005654(nucleoplasm);GO:0005794(Golgi apparatus);GO:0006281(DNA repair);GO:0006974(cellular response to DNA damage stimulus);GO:0008156(negative regulation of DNA re…	03460(Fanconi anemia pathway);04110(Cell cycle);04115(p53 signaling pathway);04218(Cellular senescence);05165(Human papillomavirus infection);05166(Human T-cell leukemia virus 1 infection);05170(Human immunodeficiency virus 1 infection)	K06640	EC:2.7.11.1	ATR serine/threonine kinase [Source:VGNC Symbol;Acc:VGNC:85684]	protein_coding	1.06925	0.885348	1.02402	0.337792	0.354826	0.484943	2.52948	1.33884	0.0257024	0.082994	up	yes
ENSSSCG00000006828	ATXN7L2	ENSSSCT00000007479	NA	NA	K11318	NA	ataxin 7 like 2 [Source:VGNC Symbol;Acc:VGNC:85693]	protein_coding	14.9423	12.6287	13.6136	4.16425	5.57709	3.37202	3.14066	1.65107	9.576e-05	0.000985718	up	yes
ENSSSCG00000033383	AVPR1A	ENSSSCT00000044768;ENSSSCT00000071080	GO:0001992(regulation of systemic arterial blood pressure by vasopressin);GO:0004930(G protein-coupled receptor activity);GO:0005000(vasopressin receptor activity);GO:0005768(endosome);GO:0005886(plasma membrane);GO:0005887(integral component of plasma membrane);GO:0007165(signal transduction);GO:0007186(G protein-coupled receptor signaling pathway);GO:0008284(positive regulation of cell populati…	04020(Calcium signaling pathway);04072(Phospholipase D signaling pathway);04080(Neuroactive ligand-receptor interaction);04270(Vascular smooth muscle contraction);04270(Vascular smooth muscle contraction)	K04226	NA	arginine vasopressin receptor 1A [Source:VGNC Symbol;Acc:VGNC:85703]	protein_coding	0.370469	1.21671	0.73201	4.19119	3.14078	4.00271	0.20461	-2.28905	7.19845e-08	1.85942e-06	down	yes
ENSSSCG00000017265	AXIN2	ENSSSCT00000018794;ENSSSCT00000055385	GO:0001756(somitogenesis);GO:0001934(positive regulation of protein phosphorylation);GO:0001957(intramembranous ossification);GO:0003139(secondary heart field specification);GO:0003413(chondrocyte differentiation involved in endochondral bone morphogenesis);GO:0005634(nucleus);GO:0005737(cytoplasm);GO:0005813(centrosome);GO:0008283(cell population proliferation);GO:0008285(negative regulation of …	04310(Wnt signaling pathway);04390(Hippo signaling pathway);04550(Signaling pathways regulating pluripotency of stem cells);04934(Cushing syndrome);05165(Human papillomavirus infection);05200(Pathways in cancer);05210(Colorectal cancer);05213(Endometrial cancer);05217(Basal cell carcinoma);05224(Breast cancer);05225(Hepatocellular carcinoma);05226(Gastric cancer);05226(Gastric cancer)	K04385	NA	axin 2 [Source:VGNC Symbol;Acc:VGNC:85708]	protein_coding	2.64805	1.85367	3.465	6.6334	3.97187	5.59068	0.491895	-1.02358	0.000441459	0.00347056	down	yes
ENSSSCG00000004687	B2M	ENSSSCT00000084189;ENSSSCT00000087633;ENSSSCT00000059196;ENSSSCT00000061969;ENSSSCT00000005176;ENSSSCT00000005170;ENSSSCT00000068772;ENSSSCT00000047804;ENSSSCT00000039009;ENSSSCT00000039226	GO:0002376(immune system process);GO:0002474(antigen processing and presentation of peptide antigen via MHC class I);GO:0002726(positive regulation of T cell cytokine production);GO:0005576(extracellular region);GO:0005794(Golgi apparatus);GO:0005829(cytosol);GO:0005886(plasma membrane);GO:0006955(immune response);GO:0007611(learning or memory);GO:0019885(antigen processing and presentation of en…	04612(Antigen processing and presentation);05163(Human cytomegalovirus infection);05166(Human T-cell leukemia virus 1 infection);05168(Herpes simplex virus 1 infection);05169(Epstein-Barr virus infection);05170(Human immunodeficiency virus 1 infection);05170(Human immunodeficiency virus 1 infection)	K08055	NA	beta-2-microglobulin [Source:NCBI gene (formerly Entrezgene);Acc:110255236]	protein_coding	347.801	299.082	288.803	56.7195	87.4523	111.142	3.66484	1.87375	2.65304e-07	5.88983e-06	up	yes
ENSSSCG00000026246	B3GAT2	ENSSSCT00000024170	GO:0000139(Golgi membrane);GO:0005794(Golgi apparatus);GO:0005975(carbohydrate metabolic process);GO:0006486(protein glycosylation);GO:0015018(galactosylgalactosylxylosylprotein 3-beta-glucuronosyltransferase activity);GO:0016020(membrane);GO:0016021(integral component of membrane);GO:0016740(transferase activity);GO:0046872(metal ion binding);GO:0050650(chondroitin sulfate proteoglycan biosynthe…	00515(Mannose type O-glycan biosynthesis)	K10157	EC:2.4.1.135	beta-1,3-glucuronyltransferase 2 [Source:VGNC Symbol;Acc:VGNC:85720]	protein_coding	2.75602	1.14305	1.96405	0.863448	0.776317	0.863788	2.34192	1.22769	0.0480902	0.13154	up	yes
ENSSSCG00000013886	B3GNT3	ENSSSCT00000048608	GO:0000139(Golgi membrane);GO:0005794(Golgi apparatus);GO:0006486(protein glycosylation);GO:0008375(acetylglucosaminyltransferase activity);GO:0008376(acetylgalactosaminyltransferase activity);GO:0008532(N-acetyllactosaminide beta-1,3-N-acetylglucosaminyltransferase activity);GO:0016020(membrane);GO:0016021(integral component of membrane);GO:0016757(transferase activity, transferring glycosyl gro…	00601(Glycosphingolipid biosynthesis - lacto and neolacto series)	K07970	2.4.1.149;EC:2.4.1.146	UDP-GlcNAc:betaGal beta-1,3-N-acetylglucosaminyltransferase 3 [Source:VGNC Symbol;Acc:VGNC:85724]	protein_coding	30.8483	22.3581	19.7656	11.058	9.87141	3.5462	2.98141	1.576	0.00169084	0.0102089	up	yes
ENSSSCG00000024393	B3GNT5	ENSSSCT00000040962;ENSSSCT00000067752;ENSSSCT00000053206;ENSSSCT00000030536;ENSSSCT00000044554	GO:0000139(Golgi membrane);GO:0005794(Golgi apparatus);GO:0006486(protein glycosylation);GO:0007275(multicellular organism development);GO:0007417(central nervous system development);GO:0007420(brain development);GO:0008375(acetylglucosaminyltransferase activity);GO:0008376(acetylgalactosaminyltransferase activity);GO:0008457(beta-galactosyl-N-acetylglucosaminylgalactosylglucosyl-ceramide beta-1,…	00601(Glycosphingolipid biosynthesis - lacto and neolacto series);00601(Glycosphingolipid biosynthesis - lacto and neolacto series)	K03766	EC:2.4.1.206	UDP-GlcNAc:betaGal beta-1,3-N-acetylglucosaminyltransferase 5 [Source:VGNC Symbol;Acc:VGNC:85726]	protein_coding	0.566456	0.240017	0.13492	0.123451	0.0402401	0.0539985	4.32448	2.11253	0.0283588	0.0892728	up	yes
ENSSSCG00000004332	BACH2	ENSSSCT00000064722	GO:0000122(negative regulation of transcription by RNA polymerase II);GO:0000978(RNA polymerase II cis-regulatory region sequence-specific DNA binding);GO:0001227(DNA-binding transcription repressor activity, RNA polymerase II-specific);GO:0003677(DNA binding);GO:0003700(DNA-binding transcription factor activity);GO:0005634(nucleus);GO:0005654(nucleoplasm);GO:0005829(cytosol);GO:0006355(regulatio…	NA	K09042	NA	BTB domain and CNC homolog 2 [Source:VGNC Symbol;Acc:VGNC:85742]	protein_coding	0.38869	0.065961	0.590968	1.49949	3.52447	0.328085	0.195368	-2.35573	0.00103541	0.00688705	down	yes
ENSSSCG00000013033	BAD	ENSSSCT00000063471	GO:0001836(release of cytochrome c from mitochondria);GO:0005543(phospholipid binding);GO:0005737(cytoplasm);GO:0005739(mitochondrion);GO:0005741(mitochondrial outer membrane);GO:0005829(cytosol);GO:0006007(glucose catabolic process);GO:0006915(apoptotic process);GO:0006919(activation of cysteine-type endopeptidase activity involved in apoptotic process);GO:0008283(cell population proliferation);…	01521(EGFR tyrosine kinase inhibitor resistance);01522(Endocrine resistance);01524(Platinum drug resistance);04012(ErbB signaling pathway);04014(Ras signaling pathway);04022(cGMP-PKG signaling pathway);04024(cAMP signaling pathway);04062(Chemokine signaling pathway);04140(Autophagy - animal);04151(PI3K-Akt signaling pathway);04210(Apoptosis);04370(VEGF signaling pathway);04510(Focal adhesion);047…	K02158	NA	BCL2 associated agonist of cell death [Source:VGNC Symbol;Acc:VGNC:85743]	protein_coding	28.4369	38.4504	34.3747	9.919	11.3492	10.2557	3.21223	1.68358	3.37039e-05	0.000405569	up	yes
ENSSSCG00000022361	BANK1	ENSSSCT00000090381;ENSSSCT00000025850;ENSSSCT00000085752;ENSSSCT00000080224	GO:0005102(signaling receptor binding);GO:0009617(response to bacterium);GO:0032715(negative regulation of interleukin-6 production);GO:0042113(B cell activation);GO:0043410(positive regulation of MAPK cascade);GO:0045947(negative regulation of translational initiation);GO:0050731(positive regulation of peptidyl-tyrosine phosphorylation);GO:0050869(negative regulation of B cell activation);GO:005…	NA	NA	NA	B cell scaffold protein with ankyrin repeats 1 [Source:NCBI gene (formerly Entrezgene);Acc:100525061]	protein_coding	8.37117	3.54249	3.37641	0.158479	0.254984	0.296675	21.5311	4.42835	4.57273e-15	4.98718e-13	up	yes
ENSSSCG00000026587	BATF3	ENSSSCT00000023780	GO:0000122(negative regulation of transcription by RNA polymerase II);GO:0000978(RNA polymerase II cis-regulatory region sequence-specific DNA binding);GO:0000981(DNA-binding transcription factor activity, RNA polymerase II-specific);GO:0001227(DNA-binding transcription repressor activity, RNA polymerase II-specific);GO:0003677(DNA binding);GO:0003700(DNA-binding transcription factor activity);GO…	NA	K09034	NA	basic leucine zipper ATF-like transcription factor 3 [Source:VGNC Symbol;Acc:VGNC:85760]	protein_coding	2.2299	2.55628	2.4015	0.148161	0.193827	0.248775	12.1668	3.60488	1.07564e-06	2.05298e-05	up	yes
ENSSSCG00000009093	BBS7	ENSSSCT00000009960;ENSSSCT00000081990;ENSSSCT00000009959;ENSSSCT00000065035;ENSSSCT00000037761	GO:0001103(RNA polymerase II repressing transcription factor binding);GO:0001654(eye development);GO:0001750(photoreceptor outer segment);GO:0005634(nucleus);GO:0005813(centrosome);GO:0005930(axoneme);GO:0006357(regulation of transcription by RNA polymerase II);GO:0007224(smoothened signaling pathway);GO:0007420(brain development);GO:0007507(heart development);GO:0008104(protein localization);GO:…	NA	NA	NA	Bardet-Biedl syndrome 7 [Source:HGNC Symbol;Acc:HGNC:18758]	protein_coding	2.66339	2.89871	2.35222	1.05974	1.00715	1.61558	2.14919	1.10379	0.0439403	0.123669	up	yes
ENSSSCG00000029163	BCAT1	ENSSSCT00000037021;ENSSSCT00000054392;ENSSSCT00000058014;ENSSSCT00000074558;ENSSSCT00000087245;ENSSSCT00000076526;ENSSSCT00000050111;ENSSSCT00000046099;ENSSSCT00000026706	GO:0003824(catalytic activity);GO:0004084(branched-chain-amino-acid transaminase activity);GO:0005739(mitochondrion);GO:0008483(transaminase activity);GO:0008652(cellular amino acid biosynthetic process);GO:0009081(branched-chain amino acid metabolic process);GO:0009082(branched-chain amino acid biosynthetic process);GO:0009098(leucine biosynthetic process);GO:0009099(valine biosynthetic process)…	00270(Cysteine and methionine metabolism);00280(Valine, leucine and isoleucine degradation);00290(Valine, leucine and isoleucine biosynthesis);00770(Pantothenate and CoA biosynthesis);00770(Pantothenate and CoA biosynthesis)	K00826	EC:2.6.1.42	branched chain amino acid transaminase 1 [Source:VGNC Symbol;Acc:VGNC:85773]	protein_coding	4.79593	3.14658	2.52166	0.25677	0.178566	0.876476	7.97688	2.99583	9.25985e-07	1.78972e-05	up	yes
ENSSSCG00000004465	BCKDHB	ENSSSCT00000075996;ENSSSCT00000004932	GO:0003824(catalytic activity);GO:0003826(alpha-ketoacid dehydrogenase activity);GO:0005730(nucleolus);GO:0005739(mitochondrion);GO:0005947(mitochondrial alpha-ketoglutarate dehydrogenase complex);GO:0007584(response to nutrient);GO:0009083(branched-chain amino acid catabolic process);GO:0055114(oxidation-reduction process);GO:0055114(oxidation-reduction process)	00280(Valine, leucine and isoleucine degradation);00640(Propanoate metabolism);00640(Propanoate metabolism)	K00167	EC:1.2.4.4	branched chain keto acid dehydrogenase E1 subunit beta [Source:VGNC Symbol;Acc:VGNC:85777]	protein_coding	4.16197	3.85142	5.27609	10.1386	10.6482	15.1436	0.369867	-1.43492	3.41413e-07	7.42356e-06	down	yes
ENSSSCG00000003177	BCL2L12	ENSSSCT00000003528;ENSSSCT00000082562;ENSSSCT00000061857;ENSSSCT00000072992;ENSSSCT00000043787	GO:0002039(p53 binding);GO:0005634(nucleus);GO:0042981(regulation of apoptotic process);GO:0045944(positive regulation of transcription by RNA polymerase II);GO:1902166(negative regulation of intrinsic apoptotic signaling pathway in response to DNA damage by p53 class mediator);GO:1990001(inhibition of cysteine-type endopeptidase activity involved in apoptotic process);GO:2000773(negative regulat…	NA	NA	NA	BCL2 like 12 [Source:VGNC Symbol;Acc:VGNC:85780]	protein_coding	4.70565	5.03276	5.92294	2.04484	1.92406	2.70611	2.34626	1.23037	0.0389025	0.112856	up	yes
ENSSSCG00000000623	BCL2L14	ENSSSCT00000000669	GO:0005829(cytosol);GO:0006915(apoptotic process);GO:0019901(protein kinase binding);GO:0042981(regulation of apoptotic process);GO:0043229(intracellular organelle);GO:2001236(regulation of extrinsic apoptotic signaling pathway)	NA	NA	NA	BCL2 like 14 [Source:VGNC Symbol;Acc:VGNC:85782]	protein_coding	1.46161	0.434017	0.891076	0.0001	0.0001	0.059035	47.0449	5.55597	1.26924e-05	0.000176896	up	yes
ENSSSCG00000007776	BCL7C	ENSSSCT00000008523;ENSSSCT00000071431	NA	NA	NA	NA	BAF chromatin remodeling complex subunit BCL7C [Source:VGNC Symbol;Acc:VGNC:85786]	protein_coding	7.51294	10.0841	10.5979	4.15712	4.75817	4.18764	2.15181	1.10555	0.00640721	0.0290683	up	yes
ENSSSCG00000004163	BCLAF1	ENSSSCT00000080467;ENSSSCT00000058049;ENSSSCT00000004602;ENSSSCT00000043883;ENSSSCT00000074568;ENSSSCT00000037556;ENSSSCT00000060649;ENSSSCT00000048439	GO:0003677(DNA binding);GO:0003712(transcription coregulator activity);GO:0005634(nucleus);GO:0005654(nucleoplasm);GO:0006915(apoptotic process);GO:0016592(mediator complex);GO:0016607(nuclear speck);GO:0043065(positive regulation of apoptotic process);GO:0043620(regulation of DNA-templated transcription in response to stress);GO:0045892(negative regulation of transcription, DNA-templated);GO:004…	NA	K13087	NA	BCL2 associated transcription factor 1 [Source:VGNC Symbol;Acc:VGNC:85787]	protein_coding	8.57018	7.40467	6.90117	1.92772	2.83786	2.15837	3.3039	1.72417	5.824e-07	1.18043e-05	up	yes
ENSSSCG00000002501	BDKRB1	ENSSSCT00000002779	NA	04020(Calcium signaling pathway);04080(Neuroactive ligand-receptor interaction);04610(Complement and coagulation cascades);04750(Inflammatory mediator regulation of TRP channels);04810(Regulation of actin cytoskeleton);05200(Pathways in cancer)	K03915	NA	bradykinin receptor B1 [Source:NCBI gene (formerly Entrezgene);Acc:100127469]	pseudogene	1.52493	3.63219	1.91879	5.10586	9.67789	3.85295	0.379676	-1.39716	0.0028411	0.0152927	down	yes
ENSSSCG00000023090	BEST1	ENSSSCT00000023752;ENSSSCT00000079858	GO:0005254(chloride channel activity);GO:0005886(plasma membrane);GO:0006811(ion transport);GO:0006821(chloride transport);GO:0009925(basal plasma membrane);GO:0016020(membrane);GO:0016021(integral component of membrane);GO:0016323(basolateral plasma membrane);GO:0030321(transepithelial chloride transport);GO:0034707(chloride channel complex);GO:0042802(identical protein binding);GO:0050908(detec…	NA	K13878	NA	bestrophin 1 [Source:VGNC Symbol;Acc:VGNC:85803]	protein_coding	0.652784	0.350874	0.461479	1.13519	0.819346	1.15064	0.471838	-1.08364	0.0130119	0.0499051	down	yes
ENSSSCG00000036385	BET1	ENSSSCT00000058374;ENSSSCT00000038212;ENSSSCT00000070053;ENSSSCT00000075095	GO:0000138(Golgi trans cisterna);GO:0005484(SNAP receptor activity);GO:0005794(Golgi apparatus);GO:0006888(endoplasmic reticulum to Golgi vesicle-mediated transport);GO:0015031(protein transport);GO:0016020(membrane);GO:0016021(integral component of membrane);GO:0030173(integral component of Golgi membrane);GO:0031201(SNARE complex);GO:0048280(vesicle fusion with Golgi apparatus);GO:0048280(vesic…	04130(SNARE interactions in vesicular transport);04130(SNARE interactions in vesicular transport)	K08504	NA	Bet1 golgi vesicular membrane trafficking protein [Source:VGNC Symbol;Acc:VGNC:85807]	protein_coding	1.45712	3.02369	3.65152	0.640823	0.635989	0.531367	4.49752	2.16913	0.000225371	0.00199681	up	yes
ENSSSCG00000028552	BHLHE41	ENSSSCT00000076919;ENSSSCT00000030248;ENSSSCT00000056533	GO:0000122(negative regulation of transcription by RNA polymerase II);GO:0000977(RNA polymerase II regulatory region sequence-specific DNA binding);GO:0000978(RNA polymerase II cis-regulatory region sequence-specific DNA binding);GO:0000981(DNA-binding transcription factor activity, RNA polymerase II-specific);GO:0001102(RNA polymerase II activating transcription factor binding);GO:0001227(DNA-bi…	04710(Circadian rhythm);04710(Circadian rhythm)	K03730	NA	basic helix-loop-helix family member e41 [Source:VGNC Symbol;Acc:VGNC:85815]	protein_coding	4.36182	1.70881	2.44623	0.679136	1.27892	1.33181	2.58882	1.37229	0.0249041	0.0811747	up	yes
ENSSSCG00000040486	BIRC5	ENSSSCT00000043788	GO:0000086(G2/M transition of mitotic cell cycle);GO:0000226(microtubule cytoskeleton organization);GO:0000281(mitotic cytokinesis);GO:0000775(chromosome, centromeric region);GO:0000776(kinetochore);GO:0000777(condensed chromosome kinetochore);GO:0004869(cysteine-type endopeptidase inhibitor activity);GO:0005634(nucleus);GO:0005694(chromosome);GO:0005737(cytoplasm);GO:0005814(centriole);GO:000581…	01524(Platinum drug resistance);04210(Apoptosis);04215(Apoptosis - multiple species);04390(Hippo signaling pathway);05161(Hepatitis B);05200(Pathways in cancer);05210(Colorectal cancer)	K08731	NA	baculoviral IAP repeat containing 5 [Source:VGNC Symbol;Acc:VGNC:85827]	protein_coding	5.48726	2.26136	1.9746	1.18247	1.45756	0.687512	2.92204	1.54698	0.0485093	0.132475	up	yes
ENSSSCG00000010504	BLNK	ENSSSCT00000075374;ENSSSCT00000079366;ENSSSCT00000011493	GO:0005737(cytoplasm);GO:0005829(cytosol);GO:0005886(plasma membrane);GO:0007169(transmembrane receptor protein tyrosine kinase signaling pathway);GO:0016020(membrane);GO:0019899(enzyme binding);GO:0035556(intracellular signal transduction);GO:0035591(signaling adaptor activity);GO:0036464(cytoplasmic ribonucleoprotein granule);GO:0042169(SH2 domain binding);GO:0050853(B cell receptor signaling p…	04064(NF-kappa B signaling pathway);04380(Osteoclast differentiation);04662(B cell receptor signaling pathway);05169(Epstein-Barr virus infection);05340(Primary immunodeficiency);05340(Primary immunodeficiency)	K07371	NA	B cell linker [Source:VGNC Symbol;Acc:VGNC:85829]	protein_coding	3.74534	2.4299	2.14585	0.0659731	0.123864	0.167662	23.2758	4.54076	8.2912e-16	9.90762e-14	up	yes
ENSSSCG00000010551	BLOC1S2	ENSSSCT00000079748;ENSSSCT00000011543	GO:0000930(gamma-tubulin complex);GO:0005739(mitochondrion);GO:0005829(cytosol);GO:0008089(anterograde axonal transport);GO:0008625(extrinsic apoptotic signaling pathway via death domain receptors);GO:0016197(endosomal transport);GO:0031083(BLOC-1 complex);GO:0032418(lysosome localization);GO:0043015(gamma-tubulin binding);GO:0048490(anterograde synaptic vesicle transport);GO:0097345(mitochondria…	NA	K16750	NA	biogenesis of lysosomal organelles complex 1 subunit 2 [Source:VGNC Symbol;Acc:VGNC:85830]	protein_coding	4.11714	2.82982	3.40042	1.04158	1.30435	1.54622	2.65853	1.41063	0.0176218	0.0626057	up	yes
ENSSSCG00000035284	BMF	ENSSSCT00000063022;ENSSSCT00000047289	GO:0006915(apoptotic process);GO:0010507(negative regulation of autophagy);GO:0016459(myosin complex);GO:0034644(cellular response to UV);GO:0043065(positive regulation of apoptotic process);GO:0043276(anoikis);GO:0043276(anoikis)	05206(MicroRNAs in cancer);05206(MicroRNAs in cancer)	K17460	NA	Bcl2 modifying factor [Source:VGNC Symbol;Acc:VGNC:85837]	protein_coding	18.6981	8.30812	9.46096	3.72481	3.90569	4.71628	2.95358	1.56246	0.000272372	0.00232481	up	yes
ENSSSCG00000016665	BMPER	ENSSSCT00000023205;ENSSSCT00000075758;ENSSSCT00000086931;ENSSSCT00000070981;ENSSSCT00000087619;ENSSSCT00000029081;ENSSSCT00000075551;ENSSSCT00000066728	GO:0001657(ureteric bud development);GO:0002043(blood vessel endothelial cell proliferation involved in sprouting angiogenesis);GO:0005576(extracellular region);GO:0005615(extracellular space);GO:0010594(regulation of endothelial cell migration);GO:0030514(negative regulation of BMP signaling pathway);GO:0042118(endothelial cell activation);GO:0048839(inner ear development);GO:0060393(regulation …	NA	NA	NA	BMP binding endothelial regulator [Source:VGNC Symbol;Acc:VGNC:97902]	protein_coding	3.17796	9.83343	9.17833	3.51915	3.16441	1.47186	2.72085	1.44406	0.0165906	0.0597922	up	yes
ENSSSCG00000021466	BMT2	ENSSSCT00000038521	GO:0005730(nucleolus);GO:0008168(methyltransferase activity);GO:0016433(rRNA (adenine) methyltransferase activity);GO:0016740(transferase activity);GO:0031167(rRNA methylation);GO:0032259(methylation);GO:0034198(cellular response to amino acid starvation);GO:0140007(KICSTOR complex);GO:1904047(S-adenosyl-L-methionine binding);GO:1904262(negative regulation of TORC1 signaling);GO:1990130(GATOR1 co…	NA	K18849	EC:2.1.1.286	base methyltransferase of 25S rRNA 2 homolog [Source:VGNC Symbol;Acc:VGNC:85849]	protein_coding	2.91445	2.059	2.06288	0.702391	1.04906	0.936754	2.61748	1.38818	0.0208039	0.0712758	up	yes
ENSSSCG00000001560	BNIP5	ENSSSCT00000058810;ENSSSCT00000001739	NA	NA	NA	NA	BCL2 interacting protein 5 [Source:VGNC Symbol;Acc:VGNC:85857]	protein_coding	6.40478	0.67421	1.10599	0.0544293	0.0127502	0.128547	41.8184	5.38607	1.42132e-07	3.38505e-06	up	yes
ENSSSCG00000001008	BPHL	ENSSSCT00000001100;ENSSSCT00000088760	GO:0005739(mitochondrion);GO:0005739(mitochondrion)	NA	K18399	EC:3.1.-.-	biphenyl hydrolase like [Source:VGNC Symbol;Acc:VGNC:85864]	protein_coding	12.044	14.2582	15.9225	4.73949	3.48943	4.19388	3.39896	1.76509	3.90042e-05	0.000459687	up	yes
ENSSSCG00000010822	BPNT1	ENSSSCT00000060420;ENSSSCT00000011840;ENSSSCT00000042178;ENSSSCT00000037357;ENSSSCT00000041811;ENSSSCT00000057863;ENSSSCT00000071349	GO:0008441(3'(2'),5'-bisphosphate nucleotidase activity);GO:0046854(phosphatidylinositol phosphorylation);GO:0046855(inositol phosphate dephosphorylation);GO:0046872(metal ion binding);GO:0046872(metal ion binding)	00920(Sulfur metabolism);00920(Sulfur metabolism)	K01082	EC:3.1.3.7	3'(2'), 5'-bisphosphate nucleotidase 1 [Source:VGNC Symbol;Acc:VGNC:96673]	protein_coding	5.3715	5.87675	4.92251	12.5243	11.8568	18.0141	0.381429	-1.39051	7.66423e-08	1.9504e-06	down	yes
ENSSSCG00000037605	BRI3	ENSSSCT00000052133	GO:0005764(lysosome);GO:0005765(lysosomal membrane);GO:0016020(membrane);GO:0016021(integral component of membrane);GO:0042802(identical protein binding)	NA	NA	NA	brain protein I3 [Source:NCBI gene (formerly Entrezgene);Acc:100627181]	protein_coding	71.1392	59.8082	62.76	17.1461	18.7113	18.1432	3.58713	1.84283	2.51666e-07	5.61429e-06	up	yes
ENSSSCG00000032831	BRI3BP	ENSSSCT00000062659	GO:0005739(mitochondrion);GO:0016020(membrane);GO:0016021(integral component of membrane)	NA	NA	NA	BRI3 binding protein [Source:VGNC Symbol;Acc:VGNC:85879]	protein_coding	0.543526	0.657364	0.353436	0.090033	0.191548	0.066676	4.46316	2.15806	0.00729615	0.0320891	up	yes
ENSSSCG00000033453	BST2	ENSSSCT00000037675;ENSSSCT00000052305	GO:0005794(Golgi apparatus);GO:0008191(metalloendopeptidase inhibitor activity);GO:0009986(cell surface);GO:0010951(negative regulation of endopeptidase activity);GO:0016020(membrane);GO:0016021(integral component of membrane);GO:0045087(innate immune response);GO:0051607(defense response to virus);GO:0051607(defense response to virus)	05168(Herpes simplex virus 1 infection);05170(Human immunodeficiency virus 1 infection);05170(Human immunodeficiency virus 1 infection)	K06731	NA	bone marrow stromal cell antigen 2 [Source:VGNC Symbol;Acc:VGNC:85897]	protein_coding	20.1595	15.4269	14.54	1.6414	1.44465	3.48453	7.6289	2.93147	1.37707e-10	6.26612e-09	up	yes
ENSSSCG00000002461	BTBD7	ENSSSCT00000068038;ENSSSCT00000002732;ENSSSCT00000085117;ENSSSCT00000076750;ENSSSCT00000084387;ENSSSCT00000079195	GO:0005634(nucleus);GO:0060693(regulation of branching involved in salivary gland morphogenesis);GO:0061138(morphogenesis of a branching epithelium);GO:0061138(morphogenesis of a branching epithelium)	NA	K10479	NA	BTB domain containing 7 [Source:VGNC Symbol;Acc:VGNC:85908]	protein_coding	4.0457	2.78488	2.23831	0.95593	1.07707	1.20307	2.80244	1.48668	0.00152562	0.00936778	up	yes
ENSSSCG00000026742	BTK	ENSSSCT00000025835;ENSSSCT00000013662	GO:0000166(nucleotide binding);GO:0001818(negative regulation of cytokine production);GO:0002250(adaptive immune response);GO:0002344(B cell affinity maturation);GO:0002376(immune system process);GO:0004672(protein kinase activity);GO:0004713(protein tyrosine kinase activity);GO:0004715(non-membrane spanning protein tyrosine kinase activity);GO:0005524(ATP binding);GO:0005547(phosphatidylinositol…	04064(NF-kappa B signaling pathway);04380(Osteoclast differentiation);04611(Platelet activation);04662(B cell receptor signaling pathway);04664(Fc epsilon RI signaling pathway);05169(Epstein-Barr virus infection);05340(Primary immunodeficiency);05340(Primary immunodeficiency)	K07370	EC:2.7.10.2	Bruton tyrosine kinase [Source:VGNC Symbol;Acc:VGNC:85914]	protein_coding	16.033	8.15562	6.74805	0.428206	0.4731	0.557661	21.2045	4.4063	6.88826e-18	1.18323e-15	up	yes
ENSSSCG00000016094	BZW1	ENSSSCT00000017522;ENSSSCT00000082928;ENSSSCT00000064308	GO:0005737(cytoplasm);GO:0005737(cytoplasm)	NA	NA	NA	basic leucine zipper and W2 domains 1 [Source:VGNC Symbol;Acc:VGNC:95885]	protein_coding	16.5806	8.24102	10.4681	5.96958	5.45772	5.9009	2.03655	1.02613	0.0263544	0.0845382	up	yes
ENSSSCG00000014634	C11orf42	ENSSSCT00000015985	NA	NA	NA	NA	chromosome 9 C11orf42 homolog [Source:VGNC Symbol;Acc:VGNC:86084]	protein_coding	1.56214	1.09887	1.31215	3.16199	2.61228	2.83264	0.461625	-1.11521	0.00713312	0.0315695	down	yes
ENSSSCG00000015035	C11orf52	ENSSSCT00000016400	NA	NA	NA	NA	chromosome 9 C11orf52 homolog [Source:VGNC Symbol;Acc:VGNC:86085]	protein_coding	2.18859	1.65428	1.30581	0.390474	0.346259	0.15159	5.79596	2.53505	0.00162035	0.00987004	up	yes
ENSSSCG00000014948	C11orf54	ENSSSCT00000016307;ENSSSCT00000081595;ENSSSCT00000084117	GO:0005634(nucleus);GO:0005654(nucleoplasm);GO:0008270(zinc ion binding);GO:0016604(nuclear body);GO:0016787(hydrolase activity);GO:0016788(hydrolase activity, acting on ester bonds);GO:0016788(hydrolase activity, acting on ester bonds)	NA	NA	NA	chromosome 9 C11orf54 homolog [Source:VGNC Symbol;Acc:VGNC:86087]	protein_coding	5.87209	5.81506	3.93955	1.35628	1.26852	3.39685	2.59509	1.37578	0.0302591	0.0935435	up	yes
ENSSSCG00000000925	C12orf29	ENSSSCT00000001010;ENSSSCT00000046326	GO:0002244(hematopoietic progenitor cell differentiation);GO:0002244(hematopoietic progenitor cell differentiation)	NA	NA	NA	chromosome 5 C12orf29 homolog [Source:VGNC Symbol;Acc:VGNC:86040]	protein_coding	3.52348	3.36925	3.48421	0.905933	0.884535	0.882192	3.88263	1.95703	0.000199832	0.00180427	up	yes
ENSSSCG00000000723	C12orf4	ENSSSCT00000000786	NA	NA	NA	NA	chromosome 5 C12orf4 homolog [Source:VGNC Symbol;Acc:VGNC:86041]	protein_coding	3.90991	4.07315	4.0967	1.43914	1.79029	2.33192	2.17209	1.11909	0.0178555	0.063207	up	yes
ENSSSCG00000040186	C12orf57	ENSSSCT00000037991;ENSSSCT00000068839	GO:0005737(cytoplasm);GO:0009791(post-embryonic development);GO:0014819(regulation of skeletal muscle contraction);GO:0016607(nuclear speck);GO:0021540(corpus callosum morphogenesis);GO:0021678(third ventricle development);GO:0036343(psychomotor behavior);GO:0048593(camera-type eye morphogenesis);GO:0050890(cognition);GO:0050890(cognition)	NA	NA	NA	chromosome 5 C12orf57 homolog [Source:VGNC Symbol;Acc:VGNC:86045]	protein_coding	31.4907	34.8272	39.5333	14.7791	12.9096	16.625	2.38868	1.25621	0.00491886	0.0235523	up	yes
ENSSSCG00000030679	C14orf28	ENSSSCT00000005509;ENSSSCT00000082728	NA	NA	NA	NA	chromosome 1 C14orf28 homolog [Source:VGNC Symbol;Acc:VGNC:85958]	protein_coding	4.13784	4.5719	3.92986	1.53068	2.35525	1.63484	2.28946	1.19501	0.0322771	0.0982831	up	yes
ENSSSCG00000030131	C15orf40	ENSSSCT00000026762;ENSSSCT00000085226	GO:0005737(cytoplasm);GO:0005737(cytoplasm)	NA	K09131	NA	chromosome 7 C15orf40 homolog [Source:NCBI gene (formerly Entrezgene);Acc:100152820]	protein_coding	7.55895	8.32488	8.04259	1.57752	3.39054	3.76926	2.73842	1.45334	0.00893193	0.0372964	up	yes
ENSSSCG00000004670	C15orf48	ENSSSCT00000005156	GO:0004129(cytochrome-c oxidase activity);GO:0005634(nucleus);GO:0005751(mitochondrial respiratory chain complex IV);GO:0009617(response to bacterium);GO:0022900(electron transport chain);GO:1902600(proton transmembrane transport)	NA	NA	NA	chromosome 1 C15orf48 homolog [Source:VGNC Symbol;Acc:VGNC:85961]	protein_coding	1.36232	0.728466	0.767555	0.105117	0.116009	0.038126	11.0253	3.46275	1.55122e-05	0.000210573	up	yes
ENSSSCG00000030002	C18orf21	ENSSSCT00000054865;ENSSSCT00000031519;ENSSSCT00000085467	NA	NA	NA	NA	chromosome 6 C18orf21 homolog [Source:NCBI gene (formerly Entrezgene);Acc:100621141]	protein_coding	13.7581	13.4714	17.0726	6.46428	6.79197	5.80187	2.32458	1.21697	0.0101905	0.0412617	up	yes
ENSSSCG00000004531	C18orf54	ENSSSCT00000005005;ENSSSCT00000054889;ENSSSCT00000043978	GO:0008285(negative regulation of cell population proliferation);GO:0008285(negative regulation of cell population proliferation)	NA	NA	NA	chromosome 1 C18orf54 homolog [Source:VGNC Symbol;Acc:VGNC:85965]	protein_coding	0.677117	0.727952	0.58207	0.16468	0.150387	0.151851	4.25587	2.08945	0.000582891	0.00435805	up	yes
ENSSSCG00000013632	C19orf38	ENSSSCT00000014887	GO:0016020(membrane);GO:0016021(integral component of membrane)	NA	NA	NA	chromosome 2 C19orf38 homolog [Source:VGNC Symbol;Acc:VGNC:86003]	protein_coding	16.4938	5.42947	7.65763	0.184974	0.265783	0.66917	26.4132	4.72319	6.7812e-11	3.28124e-09	up	yes
ENSSSCG00000013757	C19orf53	ENSSSCT00000015031	NA	NA	NA	NA	chromosome 2 C19orf53 homolog [Source:VGNC Symbol;Acc:VGNC:86005]	protein_coding	55.9496	84.7492	82.6111	41.1127	34.1489	34.9176	2.02679	1.01919	0.017209	0.0615047	up	yes
ENSSSCG00000044884	C19orf71	ENSSSCT00000070405	NA	NA	NA	NA	chromosome 2 C19orf71 homolog [Source:NCBI gene (formerly Entrezgene);Acc:100519760]	protein_coding	0.0001	0.0001	0.0001	0.0001	1.46163	1.76291	9.30336e-05	-13.3919	7.44963e-08	1.90284e-06	down	yes
ENSSSCG00000013991	C1orf35	ENSSSCT00000015282	NA	NA	NA	NA	chromosome 2 C1orf35 homolog [Source:VGNC Symbol;Acc:VGNC:86008]	protein_coding	35.7147	42.9383	38.8597	10.7204	15.8899	15.8089	2.77026	1.47002	0.000395803	0.00318078	up	yes
ENSSSCG00000045950	C1orf54	ENSSSCT00000083951	NA	NA	NA	NA	chromosome 4 C1orf54 homolog [Source:NCBI gene (formerly Entrezgene);Acc:100155802]	protein_coding	9.17258	8.18388	4.67312	1.03263	2.06334	1.24942	5.06965	2.34189	0.000194331	0.00176504	up	yes
ENSSSCG00000015613	C1orf74	ENSSSCT00000063537;ENSSSCT00000085653;ENSSSCT00000089957;ENSSSCT00000017007;ENSSSCT00000076718;ENSSSCT00000068670	NA	NA	NA	NA	chromosome 9 C1orf74 homolog [Source:VGNC Symbol;Acc:VGNC:86095]	protein_coding	4.45055	3.66892	2.31543	1.1281	1.68753	1.57441	2.37694	1.24911	0.0115948	0.0456028	up	yes
ENSSSCG00000003524	C1QA	ENSSSCT00000062481	GO:0001774(microglial cell activation);GO:0005576(extracellular region);GO:0006958(complement activation, classical pathway);GO:0007568(aging);GO:0016322(neuron remodeling);GO:0045202(synapse);GO:0048143(astrocyte activation);GO:0050808(synapse organization);GO:0098794(postsynapse);GO:0098883(synapse pruning);GO:0150062(complement-mediated synapse pruning);GO:0150064(vertebrate eye-specific patte…	04610(Complement and coagulation cascades);05020(Prion diseases);05133(Pertussis);05142(Chagas disease (American trypanosomiasis));05150(Staphylococcus aureus infection);05322(Systemic lupus erythematosus)	K03986	NA	complement C1q A chain [Source:VGNC Symbol;Acc:VGNC:96926]	protein_coding	137.882	73.1829	64.0135	4.82936	5.36807	6.29391	16.6802	4.06006	1.6116e-25	8.85865e-23	up	yes
ENSSSCG00000033512	C1QB	ENSSSCT00000064269;ENSSSCT00000074878;ENSSSCT00000084461	GO:0005576(extracellular region);GO:0006958(complement activation, classical pathway);GO:0045202(synapse);GO:0048839(inner ear development);GO:0098794(postsynapse);GO:0098883(synapse pruning);GO:0098883(synapse pruning)	04610(Complement and coagulation cascades);05020(Prion diseases);05133(Pertussis);05142(Chagas disease (American trypanosomiasis));05150(Staphylococcus aureus infection);05322(Systemic lupus erythematosus);05322(Systemic lupus erythematosus)	K03987	NA	complement C1q B chain [Source:VGNC Symbol;Acc:VGNC:85977]	protein_coding	405.626	173.584	164.733	9.87047	9.74747	11.7049	23.7508	4.5699	1.22887e-26	8.88795e-24	up	yes
ENSSSCG00000038706	C1QC	ENSSSCT00000065650	GO:0005576(extracellular region);GO:0030853(negative regulation of granulocyte differentiation);GO:0045202(synapse);GO:0045650(negative regulation of macrophage differentiation);GO:0098794(postsynapse);GO:0098883(synapse pruning)	04610(Complement and coagulation cascades);05020(Prion diseases);05133(Pertussis);05142(Chagas disease (American trypanosomiasis));05150(Staphylococcus aureus infection);05322(Systemic lupus erythematosus)	K03988	NA	complement C1q C chain [Source:VGNC Symbol;Acc:VGNC:85978]	protein_coding	770.716	339.218	272.73	15.7161	11.8489	20.8117	28.5812	4.837	5.03189e-25	2.46958e-22	up	yes
ENSSSCG00000001422	C2	ENSSSCT00000001563;ENSSSCT00000071648;ENSSSCT00000090014	GO:0002376(immune system process);GO:0004252(serine-type endopeptidase activity);GO:0005576(extracellular region);GO:0006508(proteolysis);GO:0006956(complement activation);GO:0006958(complement activation, classical pathway);GO:0008233(peptidase activity);GO:0008236(serine-type peptidase activity);GO:0016787(hydrolase activity);GO:0045087(innate immune response);GO:2000427(positive regulation of …	04610(Complement and coagulation cascades);05133(Pertussis);05150(Staphylococcus aureus infection);05322(Systemic lupus erythematosus);05322(Systemic lupus erythematosus)	K01332	EC:3.4.21.43	complement C2 [Source:VGNC Symbol;Acc:VGNC:85989]	protein_coding	67.4605	33.467	35.907	7.56818	11.6073	5.89973	5.45697	2.4481	3.60186e-09	1.23433e-07	up	yes
ENSSSCG00000033025	C21orf91	ENSSSCT00000053190;ENSSSCT00000085247;ENSSSCT00000071053;ENSSSCT00000075909	GO:0021895(cerebral cortex neuron differentiation);GO:0060999(positive regulation of dendritic spine development);GO:0060999(positive regulation of dendritic spine development)	NA	NA	NA	chromosome 13 C21orf91 homolog [Source:VGNC Symbol;Acc:VGNC:85930]	protein_coding	2.41628	0.99668	1.72545	0.572546	0.819738	0.373863	2.90939	1.54071	0.0128441	0.0493603	up	yes
ENSSSCG00000015111	C2CD2L	ENSSSCT00000016477;ENSSSCT00000064254	GO:0008526(phosphatidylinositol transfer activity);GO:0015914(phospholipid transport);GO:0016020(membrane);GO:0016021(integral component of membrane);GO:0032541(cortical endoplasmic reticulum);GO:0035091(phosphatidylinositol binding);GO:0035774(positive regulation of insulin secretion involved in cellular response to glucose stimulus);GO:0043559(insulin binding);GO:0098592(cytoplasmic side of api…	NA	NA	NA	C2CD2 like [Source:VGNC Symbol;Acc:VGNC:85991]	protein_coding	11.5802	7.80924	7.61328	3.58438	3.7112	5.72448	2.07393	1.05237	0.0375983	0.110142	up	yes
ENSSSCG00000000570	C2CD5	ENSSSCT00000058783;ENSSSCT00000038815;ENSSSCT00000054563;ENSSSCT00000064561;ENSSSCT00000072005;ENSSSCT00000000613;ENSSSCT00000061175;ENSSSCT00000067681;ENSSSCT00000038149	GO:0005509(calcium ion binding);GO:0005544(calcium-dependent phospholipid binding);GO:0005829(cytosol);GO:0005886(plasma membrane);GO:0005938(cell cortex);GO:0006906(vesicle fusion);GO:0010828(positive regulation of glucose transmembrane transport);GO:0030659(cytoplasmic vesicle membrane);GO:0031340(positive regulation of vesicle fusion);GO:0032587(ruffle membrane);GO:0032869(cellular response to…	NA	NA	NA	C2 calcium dependent domain containing 5 [Source:VGNC Symbol;Acc:VGNC:85995]	protein_coding	8.02729	5.28752	4.92446	1.26496	1.84124	2.40743	3.30803	1.72597	0.000169314	0.00157636	up	yes
ENSSSCG00000016086	C2orf69	ENSSSCT00000074170;ENSSSCT00000017514	NA	NA	NA	NA	chromosome 2 open reading frame 69 [Source:HGNC Symbol;Acc:HGNC:26799]	protein_coding	2.26571	1.5835	0.467038	0.142223	0.455521	0.562958	3.71865	1.89478	0.00959501	0.0395011	up	yes
ENSSSCG00000015718	C2orf76	ENSSSCT00000057987;ENSSSCT00000017118	NA	NA	NA	NA	chromosome 15 C2orf76 homolog [Source:VGNC Symbol;Acc:VGNC:96149]	protein_coding	2.86854	2.27284	2.74422	0.824261	0.334614	0.823797	3.97726	1.99177	0.00794377	0.0340922	up	yes
ENSSSCG00000013551	C3	ENSSSCT00000087825;ENSSSCT00000073360;ENSSSCT00000014800;ENSSSCT00000078048;ENSSSCT00000023681;ENSSSCT00000087663	GO:0001798(positive regulation of type IIa hypersensitivity);GO:0001934(positive regulation of protein phosphorylation);GO:0001970(positive regulation of activation of membrane attack complex);GO:0002376(immune system process);GO:0004866(endopeptidase inhibitor activity);GO:0005576(extracellular region);GO:0005615(extracellular space);GO:0006954(inflammatory response);GO:0006956(complement activa…	04080(Neuroactive ligand-receptor interaction);04145(Phagosome);04610(Complement and coagulation cascades);05133(Pertussis);05134(Legionellosis);05140(Leishmaniasis);05142(Chagas disease (American trypanosomiasis));05150(Staphylococcus aureus infection);05152(Tuberculosis);05167(Kaposi sarcoma-associated herpesvirus infection);05168(Herpes simplex virus 1 infection);05203(Viral carcinogenesis);05…	K03990	NA	complement C3 [Source:VGNC Symbol;Acc:VGNC:99600]	protein_coding	1088.02	350.767	312.027	29.4846	132.418	70.1386	7.54528	2.91557	1.3581e-06	2.53937e-05	up	yes
ENSSSCG00000034645	C3orf38	ENSSSCT00000059044;ENSSSCT00000039968	GO:0005634(nucleus);GO:0043065(positive regulation of apoptotic process);GO:0043065(positive regulation of apoptotic process)	NA	NA	NA	chromosome 13 C3orf38 homolog [Source:VGNC Symbol;Acc:VGNC:85934]	protein_coding	4.75903	3.19866	3.32509	1.13806	1.86002	1.6767	2.41354	1.27115	0.00455366	0.0222753	up	yes
ENSSSCG00000036636	C3orf62	ENSSSCT00000050757;ENSSSCT00000057843;ENSSSCT00000074970	GO:0005634(nucleus);GO:0005634(nucleus)	NA	NA	NA	chromosome 13 C3orf62 homolog [Source:VGNC Symbol;Acc:VGNC:85936]	protein_coding	0.482687	0.985095	0.456693	0.0861291	0.1319	0.259842	4.02718	2.00977	0.00861353	0.0363647	up	yes
ENSSSCG00000035935	C3orf80	ENSSSCT00000047657	GO:0016020(membrane);GO:0016021(integral component of membrane)	NA	NA	NA	chromosome 13 C3orf80 homolog [Source:VGNC Symbol;Acc:VGNC:85938]	protein_coding	0.725503	0.325083	0.213528	0.092466	0.135286	0.046229	4.61387	2.20598	0.0181617	0.0640766	up	yes
ENSSSCG00000015662	C4BPA	ENSSSCT00000017061;ENSSSCT00000044614;ENSSSCT00000017060;ENSSSCT00000039273;ENSSSCT00000038832;ENSSSCT00000064716	NA	04610(Complement and coagulation cascades);05133(Pertussis);05133(Pertussis)	K04002	NA	complement component 4 binding protein, alpha [Source:NCBI gene (formerly Entrezgene);Acc:396982]	protein_coding	51.0836	25.3413	22.8862	3.04829	4.87126	2.8431	9.22739	3.20592	1.10193e-14	1.13006e-12	up	yes
ENSSSCG00000015794	C4orf47	ENSSSCT00000061654;ENSSSCT00000017197	GO:0005737(cytoplasm);GO:0005813(centrosome);GO:0005815(microtubule organizing center);GO:0005856(cytoskeleton);GO:0005881(cytoplasmic microtubule);GO:0097731(9+0 non-motile cilium);GO:0097731(9+0 non-motile cilium)	NA	NA	NA	chromosome 15 C4orf47 homolog [Source:VGNC Symbol;Acc:VGNC:96285]	protein_coding	0.490566	0.340434	0.151049	0.0226931	0.0530397	0.0897025	5.93615	2.56953	0.00652144	0.0294734	up	yes
ENSSSCG00000029371	C5AR1	ENSSSCT00000027942	GO:0001774(microglial cell activation);GO:0002430(complement receptor mediated signaling pathway);GO:0004875(complement receptor activity);GO:0004878(complement component C5a receptor activity);GO:0004930(G protein-coupled receptor activity);GO:0005886(plasma membrane);GO:0006935(chemotaxis);GO:0006954(inflammatory response);GO:0007165(signal transduction);GO:0007186(G protein-coupled receptor si…	04080(Neuroactive ligand-receptor interaction);04610(Complement and coagulation cascades);05150(Staphylococcus aureus infection)	K04010	NA	complement C5a receptor 1 [Source:VGNC Symbol;Acc:VGNC:86038]	protein_coding	27.6209	10.8808	7.6225	0.480347	0.660385	0.856755	23.0911	4.52927	1.80087e-19	3.69366e-17	up	yes
ENSSSCG00000032323	C5orf15	ENSSSCT00000068326;ENSSSCT00000038477	GO:0016020(membrane);GO:0016021(integral component of membrane);GO:0016021(integral component of membrane)	NA	NA	NA	chromosome 2 C5orf15 homolog [Source:VGNC Symbol;Acc:VGNC:86009]	protein_coding	11.4522	10.3572	8.33682	4.42742	5.47524	4.1068	2.15185	1.10558	0.00991032	0.0404478	up	yes
ENSSSCG00000034954	C5orf24	ENSSSCT00000047815;ENSSSCT00000082051;ENSSSCT00000039433	NA	NA	NA	NA	chromosome 2 C5orf24 homolog [Source:VGNC Symbol;Acc:VGNC:86010]	protein_coding	7.28176	6.45585	5.25176	1.66744	2.3987	2.7942	2.76799	1.46884	0.000175942	0.00162699	up	yes
ENSSSCG00000035341	C6orf89	ENSSSCT00000059917;ENSSSCT00000050587;ENSSSCT00000083780	GO:0000139(Golgi membrane);GO:0005737(cytoplasm);GO:0005794(Golgi apparatus);GO:0005886(plasma membrane);GO:0016020(membrane);GO:0016021(integral component of membrane);GO:0030496(midbody);GO:0042060(wound healing);GO:0045787(positive regulation of cell cycle);GO:0050673(epithelial cell proliferation);GO:1901727(positive regulation of histone deacetylase activity);GO:1901727(positive regulation o…	NA	NA	NA	chromosome 7 C6orf89 homolog [Source:VGNC Symbol;Acc:VGNC:86075]	protein_coding	6.68939	6.09843	4.7176	2.26201	1.62493	2.07141	2.93796	1.55482	4.99943e-05	0.000568257	up	yes
ENSSSCG00000030668	C7H6orf125	ENSSSCT00000030529;ENSSSCT00000075283;ENSSSCT00000058543	GO:0005739(mitochondrion);GO:0034551(mitochondrial respiratory chain complex III assembly);GO:0042645(mitochondrial nucleoid);GO:0042645(mitochondrial nucleoid)	NA	K17682	NA	uncharacterized protein C6orf125 homolog [Source:NCBI gene (formerly Entrezgene);Acc:100153818]	protein_coding	7.52519	6.93998	8.43619	2.96911	2.34	1.97731	3.14302	1.65215	0.000228823	0.00202088	up	yes
ENSSSCG00000011010	C9orf72	ENSSSCT00000047297;ENSSSCT00000052740;ENSSSCT00000012052;ENSSSCT00000051717	GO:0000932(P-body);GO:0001933(negative regulation of protein phosphorylation);GO:0005085(guanyl-nucleotide exchange factor activity);GO:0005615(extracellular space);GO:0005634(nucleus);GO:0005737(cytoplasm);GO:0005764(lysosome);GO:0005768(endosome);GO:0005776(autophagosome);GO:0006897(endocytosis);GO:0006914(autophagy);GO:0010494(cytoplasmic stress granule);GO:0010506(regulation of autophagy);GO:…	NA	NA	NA	chromosome 10 C9orf72 homolog [Source:VGNC Symbol;Acc:VGNC:96173]	protein_coding	5.11135	3.14532	4.04071	1.33129	2.20567	2.00089	2.22061	1.15095	0.0454187	0.126755	up	yes
ENSSSCG00000031105	C9orf85	ENSSSCT00000079039;ENSSSCT00000050062;ENSSSCT00000067091	NA	NA	NA	NA	chromosome 1 C9orf85 homolog [Source:VGNC Symbol;Acc:VGNC:85976]	protein_coding	0.574154	0.626848	0.58942	0.0918912	0.120487	0.237362	3.98101	1.99313	0.00918923	0.0381053	up	yes
ENSSSCG00000006143	CA13	ENSSSCT00000057817;ENSSSCT00000006736;ENSSSCT00000043037;ENSSSCT00000060972;ENSSSCT00000073326	GO:0004089(carbonate dehydratase activity);GO:0005737(cytoplasm);GO:0005829(cytosol);GO:0006730(one-carbon metabolic process);GO:0008270(zinc ion binding);GO:0016829(lyase activity);GO:0016836(hydro-lyase activity);GO:0043209(myelin sheath);GO:0043231(intracellular membrane-bounded organelle);GO:0046872(metal ion binding);GO:0046872(metal ion binding)	00910(Nitrogen metabolism);00910(Nitrogen metabolism)	K01672	EC:4.2.1.1	carbonic anhydrase 13 [Source:VGNC Symbol;Acc:VGNC:98745]	protein_coding	2.57152	0.855452	0.794507	0.111508	0.140977	0.0716834	13.0225	3.70293	6.46692e-08	1.68311e-06	up	yes
ENSSSCG00000006141	CA3	ENSSSCT00000041006;ENSSSCT00000006734	GO:0004089(carbonate dehydratase activity);GO:0005737(cytoplasm);GO:0005829(cytosol);GO:0008270(zinc ion binding);GO:0009617(response to bacterium);GO:0016151(nickel cation binding);GO:0016829(lyase activity);GO:0046872(metal ion binding);GO:0046872(metal ion binding)	00910(Nitrogen metabolism);00910(Nitrogen metabolism)	K01672	EC:4.2.1.1	carbonic anhydrase 3 [Source:VGNC Symbol;Acc:VGNC:86099]	protein_coding	1.37365	0.0612189	3.09347	11.8689	19.8151	0.186127	0.142088	-2.81515	0.00723172	0.0318827	down	yes
ENSSSCG00000023186	CA4	ENSSSCT00000032087;ENSSSCT00000090910	GO:0004089(carbonate dehydratase activity);GO:0005791(rough endoplasmic reticulum);GO:0005793(endoplasmic reticulum-Golgi intermediate compartment);GO:0005794(Golgi apparatus);GO:0005802(trans-Golgi network);GO:0005886(plasma membrane);GO:0006730(one-carbon metabolic process);GO:0008270(zinc ion binding);GO:0009986(cell surface);GO:0015701(bicarbonate transport);GO:0016020(membrane);GO:0016324(ap…	00910(Nitrogen metabolism);04964(Proximal tubule bicarbonate reclamation);04964(Proximal tubule bicarbonate reclamation)	K18246	EC:4.2.1.1	carbonic anhydrase 4 [Source:VGNC Symbol;Acc:VGNC:86100]	protein_coding	7.42778	5.35177	3.89382	0.877268	1.60097	0.59866	5.4189	2.438	0.000314253	0.00261883	up	yes
ENSSSCG00000012141	CA5B	ENSSSCT00000013280;ENSSSCT00000091410;ENSSSCT00000033163	GO:0004089(carbonate dehydratase activity);GO:0005737(cytoplasm);GO:0005739(mitochondrion);GO:0006730(one-carbon metabolic process);GO:0008270(zinc ion binding);GO:0009617(response to bacterium);GO:0016020(membrane);GO:0016021(integral component of membrane);GO:0016829(lyase activity);GO:0016836(hydro-lyase activity);GO:0046872(metal ion binding);GO:0046872(metal ion binding)	00910(Nitrogen metabolism);00910(Nitrogen metabolism)	K01672	EC:4.2.1.1	carbonic anhydrase 5B [Source:VGNC Symbol;Acc:VGNC:86102]	protein_coding	1.39486	1.68046	1.80495	0.705883	0.753043	0.477161	2.52069	1.33382	0.018944	0.0662245	up	yes
ENSSSCG00000000082	CACNA1I	ENSSSCT00000000088	GO:0001518(voltage-gated sodium channel complex);GO:0005216(ion channel activity);GO:0005244(voltage-gated ion channel activity);GO:0005245(voltage-gated calcium channel activity);GO:0005248(voltage-gated sodium channel activity);GO:0005261(cation channel activity);GO:0005262(calcium channel activity);GO:0005886(plasma membrane);GO:0005891(voltage-gated calcium channel complex);GO:0006811(ion tra…	04010(MAPK signaling pathway);04020(Calcium signaling pathway);04713(Circadian entrainment);04925(Aldosterone synthesis and secretion);04927(Cortisol synthesis and secretion);04934(Cushing syndrome)	K04856	NA	calcium voltage-gated channel subunit alpha1 I [Source:VGNC Symbol;Acc:VGNC:97908]	protein_coding	3.99032	0.687223	0.69801	0.144173	0.88521	0.215397	4.31847	2.11052	0.0170761	0.0611732	up	yes
ENSSSCG00000015402	CACNA2D1	ENSSSCT00000059421;ENSSSCT00000050104;ENSSSCT00000062250;ENSSSCT00000016777;ENSSSCT00000058929	GO:0005244(voltage-gated ion channel activity);GO:0005245(voltage-gated calcium channel activity);GO:0005262(calcium channel activity);GO:0005891(voltage-gated calcium channel complex);GO:0006811(ion transport);GO:0006816(calcium ion transport);GO:0016020(membrane);GO:0016021(integral component of membrane);GO:0016529(sarcoplasmic reticulum);GO:0030315(T-tubule);GO:0034765(regulation of ion trans…	04010(MAPK signaling pathway);04260(Cardiac muscle contraction);04261(Adrenergic signaling in cardiomyocytes);04921(Oxytocin signaling pathway);05410(Hypertrophic cardiomyopathy (HCM));05412(Arrhythmogenic right ventricular cardiomyopathy (ARVC));05414(Dilated cardiomyopathy (DCM));05414(Dilated cardiomyopathy (DCM))	K04858	NA	calcium voltage-gated channel auxiliary subunit alpha2delta 1 [Source:VGNC Symbol;Acc:VGNC:86120]	protein_coding	4.31103	4.98148	5.27003	1.68728	2.62477	2.90384	2.01812	1.01301	0.0272393	0.0866487	up	yes
ENSSSCG00000011040	CACNB2	ENSSSCT00000038059;ENSSSCT00000070943;ENSSSCT00000046405;ENSSSCT00000052242;ENSSSCT00000057605;ENSSSCT00000075442;ENSSSCT00000049791;ENSSSCT00000012084;ENSSSCT00000061976;ENSSSCT00000054693	GO:0005244(voltage-gated ion channel activity);GO:0005245(voltage-gated calcium channel activity);GO:0005262(calcium channel activity);GO:0005891(voltage-gated calcium channel complex);GO:0006811(ion transport);GO:0006816(calcium ion transport);GO:0007268(chemical synaptic transmission);GO:0007528(neuromuscular junction development);GO:0007601(visual perception);GO:0008331(high voltage-gated calc…	04010(MAPK signaling pathway);04260(Cardiac muscle contraction);04261(Adrenergic signaling in cardiomyocytes);04921(Oxytocin signaling pathway);05410(Hypertrophic cardiomyopathy (HCM));05412(Arrhythmogenic right ventricular cardiomyopathy (ARVC));05414(Dilated cardiomyopathy (DCM));05414(Dilated cardiomyopathy (DCM))	K04863	NA	calcium voltage-gated channel auxiliary subunit beta 2 [Source:VGNC Symbol;Acc:VGNC:95599]	protein_coding	0.87399	0.762585	1.1435	2.37401	2.10762	1.63572	0.454457	-1.13778	0.00142524	0.00889933	down	yes
ENSSSCG00000029073	CACNB4	ENSSSCT00000047147;ENSSSCT00000023642;ENSSSCT00000081529;ENSSSCT00000052162;ENSSSCT00000073925;ENSSSCT00000051892	GO:0005245(voltage-gated calcium channel activity);GO:0005891(voltage-gated calcium channel complex);GO:0006816(calcium ion transport);GO:0007214(gamma-aminobutyric acid signaling pathway);GO:0007268(chemical synaptic transmission);GO:0007528(neuromuscular junction development);GO:0007628(adult walking behavior);GO:0008331(high voltage-gated calcium channel activity);GO:0014051(gamma-aminobutyric…	04010(MAPK signaling pathway);04260(Cardiac muscle contraction);04261(Adrenergic signaling in cardiomyocytes);04921(Oxytocin signaling pathway);05410(Hypertrophic cardiomyopathy (HCM));05412(Arrhythmogenic right ventricular cardiomyopathy (ARVC));05414(Dilated cardiomyopathy (DCM));05414(Dilated cardiomyopathy (DCM))	K04865	NA	calcium voltage-gated channel auxiliary subunit beta 4 [Source:NCBI gene (formerly Entrezgene);Acc:396585]	protein_coding	0.235461	0.165379	0.136241	0.00540295	0.0529835	0.00638511	8.29193	3.05171	0.00345714	0.0179073	up	yes
ENSSSCG00000025532	CACNG7	ENSSSCT00000023281;ENSSSCT00000061698	GO:0005244(voltage-gated ion channel activity);GO:0005245(voltage-gated calcium channel activity);GO:0005246(calcium channel regulator activity);GO:0005262(calcium channel activity);GO:0006811(ion transport);GO:0006816(calcium ion transport);GO:0016020(membrane);GO:0016021(integral component of membrane);GO:0016247(channel regulator activity);GO:0019226(transmission of nerve impulse);GO:0032281(A…	04010(MAPK signaling pathway);04260(Cardiac muscle contraction);04261(Adrenergic signaling in cardiomyocytes);04921(Oxytocin signaling pathway);05410(Hypertrophic cardiomyopathy (HCM));05412(Arrhythmogenic right ventricular cardiomyopathy (ARVC));05414(Dilated cardiomyopathy (DCM));05414(Dilated cardiomyopathy (DCM))	K04872	NA	calcium voltage-gated channel auxiliary subunit gamma 7 [Source:VGNC Symbol;Acc:VGNC:86130]	protein_coding	0.342635	0.300234	0.642365	2.0876	1.60652	0.566997	0.301619	-1.7292	0.00168532	0.0101845	down	yes
ENSSSCG00000031831	CADM1	ENSSSCT00000039284;ENSSSCT00000039502;ENSSSCT00000084702;ENSSSCT00000016429;ENSSSCT00000082417;ENSSSCT00000079986;ENSSSCT00000059344	GO:0005102(signaling receptor binding);GO:0005886(plasma membrane);GO:0008037(cell recognition);GO:0016020(membrane);GO:0016021(integral component of membrane);GO:0042271(susceptibility to natural killer cell mediated cytotoxicity);GO:0045954(positive regulation of natural killer cell mediated cytotoxicity);GO:0050715(positive regulation of cytokine secretion);GO:0051606(detection of stimulus);GO…	04514(Cell adhesion molecules (CAMs));04514(Cell adhesion molecules (CAMs))	K06781	NA	cell adhesion molecule 1 [Source:VGNC Symbol;Acc:VGNC:86134]	protein_coding	3.96182	1.73028	1.71424	0.439839	0.469453	0.226154	6.52285	2.7055	4.203e-07	8.98253e-06	up	yes
ENSSSCG00000006415	CADM3	ENSSSCT00000053737;ENSSSCT00000042275;ENSSSCT00000007028;ENSSSCT00000079356	GO:0005911(cell-cell junction);GO:0007156(homophilic cell adhesion via plasma membrane adhesion molecules);GO:0007157(heterophilic cell-cell adhesion via plasma membrane cell adhesion molecules);GO:0008104(protein localization);GO:0016020(membrane);GO:0016021(integral component of membrane);GO:0042803(protein homodimerization activity);GO:0098688(parallel fiber to Purkinje cell synapse);GO:009905…	04514(Cell adhesion molecules (CAMs));04514(Cell adhesion molecules (CAMs))	K06780	NA	cell adhesion molecule 3 [Source:VGNC Symbol;Acc:VGNC:86135]	protein_coding	3.49428	0.889712	3.16894	3.76414	9.7963	2.03589	0.484276	-1.0461	0.0178478	0.0631962	down	yes
ENSSSCG00000016611	CADPS2	ENSSSCT00000018085;ENSSSCT00000055766;ENSSSCT00000055343;ENSSSCT00000067156;ENSSSCT00000066495;ENSSSCT00000048177;ENSSSCT00000059705	GO:0005654(nucleoplasm);GO:0006887(exocytosis);GO:0009267(cellular response to starvation);GO:0015031(protein transport);GO:0016079(synaptic vesicle exocytosis);GO:0016082(synaptic vesicle priming);GO:0031410(cytoplasmic vesicle);GO:0042734(presynaptic membrane);GO:0043231(intracellular membrane-bounded organelle);GO:0045202(synapse);GO:0045211(postsynaptic membrane);GO:0045921(positive regulatio…	NA	K19933	NA	calcium dependent secretion activator 2 [Source:VGNC Symbol;Acc:VGNC:86137]	protein_coding	3.24335	2.14369	2.2866	1.22325	1.35099	0.882434	2.21995	1.15053	0.0472565	0.130088	up	yes
[truncated: 3,097 more rows]
[truncated: 1 more columns]

## Sheet: Table S5
Pathway_ID	KEGG_Level_1	KEGG_Level_2	Pathway_Name	IDs	S	TS	B	TB	Rich.Factor	P.value	Sig.Sign.P	Q.value	Sig.Sign.Q	S_Up_ID	S_Up_Num	S_Down_ID	S_Down_Num	MapID_Count	ZScore
[truncated: 313 more rows]

## Sheet: Table S6
GO_ID	GO_Term	GO_Category	IDs	S	TS	B	TB	Rich.Factor	P.value	Sig.Sign.P	Q.value	Sig.Sign.Q	S_Up_ID	S_Up_Num	S_Down_ID	S_Down_Num	MapID_Count	ZScore
[truncated: 8,762 more rows]
